# Supplementary material for: Collision Cross Section Prediction with Molecular Fingerprint Using Machine Learning
Source: Molecules. 2022 Sep 29;27(19):6424. doi: 10.3390/molecules27196424 (PMC9572128; doi:10.3390/molecules27196424)
Supplement: Supplementary file 1 [file molecules-27-06424-s001.zip]

Archive with 4 entries (4 files):
- CCSPredictedData.csv
- molecules-1915961-supplementary.pdf
- SuperClassModeling.csv
- SusDatCCSprediction.csv
