# Supplementary material for: Collision Cross Section Prediction with Molecular Fingerprint Using Machine Learning
Source: Molecules. 2022 Sep 29;27(19):6424. doi: 10.3390/molecules27196424 (PMC9572128; doi:10.3390/molecules27196424)
Supplement: Supplementary file 1 [file molecules-27-06424-s001.zip › CCSPredictedData.csv]

CID	SMILES	adduct	CCS	Super.Class	Source
14410	C1(=C(C(=C(C(=C1Br)Br)Br)Br)Br)OC2=C(C(=C(C(=C2Br)Br)Br)Br)Br	[M+H]+	205.23	Benzenoids	1-s2.0-S0003267018302824-mmc2.csv
16318	C1(=C(C(=C(C(=C1Cl)Cl)Cl)Cl)Cl)C2=C(C(=C(C(=C2Cl)Cl)Cl)Cl)Cl	[M+H]+	185.88	Benzenoids	1-s2.0-S0003267018302824-mmc2.csv
45472	C1=C(C(=C(C(=C1Br)Br)Br)Br)OC2=C(C(=C(C(=C2Br)Br)Br)Br)Br	[M+H]+	202.77	Benzenoids	1-s2.0-S0003267018302824-mmc2.csv
40484	C1=C(C(=C(C(=C1Cl)Cl)C2=C(C(=C(C(=C2Cl)Cl)Cl)Cl)Cl)Cl)Cl	[M+H]+	182.07	Benzenoids	1-s2.0-S0003267018302824-mmc2.csv
16495	C1=C(C(=C(C(=C1Cl)Cl)C2=C(C(=CC(=C2Cl)Cl)Cl)Cl)Cl)Cl	[M+H]+	176.9	Benzenoids	1-s2.0-S0003267018302824-mmc2.csv
91648	C1=C(C(=C(C(=C1Cl)Cl)Cl)C2=C(C(=C(C(=C2Cl)Cl)Cl)Cl)Cl)Cl	[M+H]+	181.7	Benzenoids	1-s2.0-S0003267018302824-mmc2.csv
38411	C1=C(C(=C(C(=C1Cl)Cl)Cl)Cl)C2=C(C(=C(C(=C2Cl)Cl)Cl)Cl)Cl	[M+H]+	183.47	Benzenoids	1-s2.0-S0003267018302824-mmc2.csv
37251	C1=C(C(=C(C(=C1Cl)Cl)Cl)Cl)C2=CC(=C(C(=C2Cl)Cl)Cl)Cl	[M+H]+	180.33	Benzenoids	1-s2.0-S0003267018302824-mmc2.csv
178006	C1=C(C(=C(C(=C1Cl)O)Cl)Cl)C2=CC(=C(C(=C2Cl)Cl)Cl)Cl	[M+H]+	180.4	Benzenoids	1-s2.0-S0003267018302824-mmc2.csv
36160	C1=C(C(=CC(=C1Br)Br)Br)OC2=C(C(=C(C(=C2Br)Br)Br)Br)Br	[M+H]+	195.7	Benzenoids	1-s2.0-S0003267018302824-mmc2.csv
15509899	C1=C(C(=CC(=C1Br)Br)Br)OC2=C(C(=C(C=C2Br)Br)Br)Br	[M+H]+	189.87	Benzenoids	1-s2.0-S0003267018302824-mmc2.csv
155166	C1=C(C(=CC(=C1Br)Br)Br)OC2=CC(=C(C=C2Br)Br)Br	[M+H]+	183.53	Benzenoids	1-s2.0-S0003267018302824-mmc2.csv
102457011	C1=C(C(=CC(=C1Br)OC2=CC(=C(C=C2Br)Br)Br)Br)O	[M+H]+	185.4	Benzenoids	1-s2.0-S0003267018302824-mmc2.csv
86256374	C1=C(C(=CC(=C1OC2=CC(=C(C=C2Br)Br)Br)Br)Br)O	[M+H]+	184.3	Benzenoids	1-s2.0-S0003267018302824-mmc2.csv
15509898	C1=C(C=C(C(=C1Br)OC2=CC(=C(C=C2Br)Br)Br)Br)Br	[M+H]+	183.57	Benzenoids	1-s2.0-S0003267018302824-mmc2.csv
633844	C1=C(C=C(C(=C1Cl)Cl)Cl)C2=C(C(=CC(=C2Cl)Cl)Cl)Cl	[M+H]+	173.87	Benzenoids	1-s2.0-S0003267018302824-mmc2.csv
36231	C1=C(C=C(C(=C1Cl)Cl)Cl)C2=CC(=C(C(=C2)Cl)Cl)Cl	[M+H]+	169.97	Benzenoids	1-s2.0-S0003267018302824-mmc2.csv
38306	C1=C(C=C(C(=C1Cl)Cl)Cl)C2=CC(=C(C(=C2Cl)Cl)Cl)Cl	[M+H]+	173.93	Benzenoids	1-s2.0-S0003267018302824-mmc2.csv
40479	C1=C(C=C(C(=C1Cl)Cl)Cl)C2=CC(=C(C=C2Cl)Cl)Cl	[M+H]+	167.83	Benzenoids	1-s2.0-S0003267018302824-mmc2.csv
85823092	C1=C(C=C(C(=C1Cl)O)Cl)C2=C(C(=CC(=C2Cl)Cl)Cl)Cl	[M+H]+	175.7	Benzenoids	1-s2.0-S0003267018302824-mmc2.csv
178005	C1=C(C=C(C(=C1Cl)O)Cl)C2=CC(=C(C(=C2Cl)Cl)Cl)Cl	[M+H]+	175.3	Benzenoids	1-s2.0-S0003267018302824-mmc2.csv
86256375	C1=C(C=C(C(=C1O)OC2=CC(=C(C=C2Br)Br)Br)Br)Br	[M+H]+	183.27	Benzenoids	1-s2.0-S0003267018302824-mmc2.csv
40485	C1=CC(=C(C(=C1C2=C(C(=C(C(=C2Cl)Cl)Cl)Cl)Cl)Cl)Cl)Cl	[M+H]+	178.03	Benzenoids	1-s2.0-S0003267018302824-mmc2.csv
37035	C1=CC(=C(C(=C1C2=CC(=C(C=C2Cl)Cl)Cl)Cl)Cl)Cl	[M+H]+	167.98	Benzenoids	1-s2.0-S0003267018302824-mmc2.csv
13828347	C1=CC(=C(C(=C1OC2=C(C(=C(C=C2)Br)Br)Br)Br)Br)Br	[M+H]+	184.57	Benzenoids	1-s2.0-S0003267018302824-mmc2.csv
15254861	C1=CC(=C(C(=C1OC2=CC(=C(C=C2Br)Br)Br)Br)Br)Br	[M+H]+	184.87	Benzenoids	1-s2.0-S0003267018302824-mmc2.csv
177368	C1=CC(=C(C=C1Br)Br)OC2=C(C(=C(C=C2)Br)Br)Br	[M+H]+	176.97	Benzenoids	1-s2.0-S0003267018302824-mmc2.csv
10885611	C1=CC(=C(C=C1Br)Br)OC2=C(C(=C(C=C2)Br)O)Br	[M+H]+	177.23	Benzenoids	1-s2.0-S0003267018302824-mmc2.csv
71374219	C1=CC(=C(C=C1Br)Br)OC2=C(C(=C(C=C2)O)Br)Br	[M+H]+	176.9	Benzenoids	1-s2.0-S0003267018302824-mmc2.csv
11952901	C1=CC(=C(C=C1Br)Br)OC2=C(C(=C(C=C2O)Br)Br)Br	[M+H]+	183.53	Benzenoids	1-s2.0-S0003267018302824-mmc2.csv
4563	C1=CC(=C(C=C1Br)Br)OC2=C(C(=CC(=C2)Br)Br)O	[M+H]+	176.07	Benzenoids	1-s2.0-S0003267018302824-mmc2.csv
11730812	C1=CC(=C(C=C1Br)Br)OC2=C(C=C(C(=C2)O)Br)Br	[M+H]+	177.53	Benzenoids	1-s2.0-S0003267018302824-mmc2.csv
101558844	C1=CC(=C(C=C1Br)Br)OC2=C(C=C(C(=C2Br)O)Br)Br	[M+H]+	181.73	Benzenoids	1-s2.0-S0003267018302824-mmc2.csv
95170	C1=CC(=C(C=C1Br)Br)OC2=C(C=C(C=C2)Br)Br	[M+H]+	169.73	Benzenoids	1-s2.0-S0003267018302824-mmc2.csv
154083	C1=CC(=C(C=C1Br)Br)OC2=C(C=C(C=C2Br)Br)Br	[M+H]+	175.37	Benzenoids	1-s2.0-S0003267018302824-mmc2.csv
3086109	C1=CC(=C(C=C1Br)Br)OC2=C(C=C(C=C2Br)Br)O	[M+H]+	175.53	Benzenoids	1-s2.0-S0003267018302824-mmc2.csv
11026242	C1=CC(=C(C=C1Br)O)OC2=C(C=C(C=C2)Br)Br	[M+H]+	169.13	Benzenoids	1-s2.0-S0003267018302824-mmc2.csv
38857	C1=CC(=C(C=C1C2=C(C(=C(C(=C2Cl)Cl)Cl)Cl)Cl)Cl)Cl	[M+H]+	173.33	Benzenoids	1-s2.0-S0003267018302824-mmc2.csv
36188	C1=CC(=C(C=C1C2=C(C(=C(C=C2)Cl)Cl)Cl)Cl)Cl	[M+H]+	161.63	Benzenoids	1-s2.0-S0003267018302824-mmc2.csv
36186	C1=CC(=C(C=C1C2=C(C=CC(=C2)Cl)Cl)Cl)Cl	[M+H]+	155.63	Benzenoids	1-s2.0-S0003267018302824-mmc2.csv
63090	C1=CC(=C(C=C1C2=CC(=C(C(=C2)Cl)Cl)Cl)Cl)Cl	[M+H]+	164.43	Benzenoids	1-s2.0-S0003267018302824-mmc2.csv
38019	C1=CC(=C(C=C1C2=CC(=C(C(=C2Cl)Cl)Cl)Cl)Cl)Cl	[M+H]+	168.23	Benzenoids	1-s2.0-S0003267018302824-mmc2.csv
644180	C1=CC(=C(C=C1C2=CC(=C(C(=C2Cl)Cl)Cl)Cl)Cl)O	[M+H]+	170	Benzenoids	1-s2.0-S0003267018302824-mmc2.csv
36187	C1=CC(=C(C=C1C2=CC(=C(C=C2)Cl)Cl)Cl)Cl	[M+H]+	156.8	Benzenoids	1-s2.0-S0003267018302824-mmc2.csv
63086	C1=CC(=C(C=C1Cl)C2=C(C=C(C=C2Cl)Cl)Cl)Cl	[M+H]+	160.74	Benzenoids	1-s2.0-S0003267018302824-mmc2.csv
37248	C1=CC(=C(C=C1Cl)C2=C(C=CC(=C2)Cl)Cl)Cl	[M+H]+	156.69	Benzenoids	1-s2.0-S0003267018302824-mmc2.csv
119518	C1=CC(=C(C=C1Cl)C2=CC(=C(C(=C2Cl)Cl)Cl)Cl)O	[M+H]+	166.8	Benzenoids	1-s2.0-S0003267018302824-mmc2.csv
37807	C1=CC(=C(C=C1Cl)C2=CC(=C(C=C2Cl)Cl)Cl)Cl	[M+H]+	162.55	Benzenoids	1-s2.0-S0003267018302824-mmc2.csv
11026243	C1=CC(=C(C=C1O)Br)OC2=C(C=C(C=C2)Br)Br	[M+H]+	169.87	Benzenoids	1-s2.0-S0003267018302824-mmc2.csv
153963	C1=CC(=C(C=C1O)Cl)C2=C(C=C(C=C2Cl)Cl)Cl	[M+H]+	163.2	Benzenoids	1-s2.0-S0003267018302824-mmc2.csv
119106	C1=CC(=C(C=C1O)Cl)C2=C(C=CC(=C2)Cl)Cl	[M+H]+	158.9	Benzenoids	1-s2.0-S0003267018302824-mmc2.csv
12110099	C1=CC(=C(C=C1OC2=C(C(=C(C(=C2Br)Br)Br)Br)Br)Br)Br	[M+H]+	191.03	Benzenoids	1-s2.0-S0003267018302824-mmc2.csv
15509893	C1=CC(=C(C=C1OC2=C(C=C(C=C2)Br)Br)Br)Br	[M+H]+	170.3	Benzenoids	1-s2.0-S0003267018302824-mmc2.csv
13283771	C1=CC(=C(C=C1OC2=CC(=C(C=C2)Br)Br)Br)Br	[M+H]+	172.07	Benzenoids	1-s2.0-S0003267018302824-mmc2.csv
92346	C1=CC(=CC(=C1)O)C2=C(C=CC(=C2)Cl)Cl	[M+H]+	155.4	Benzenoids	1-s2.0-S0003267018302824-mmc2.csv
11067897	C1=CC(=CC(=C1)OC2=C(C=C(C=C2)Br)Br)O	[M+H]+	164.6	Benzenoids	1-s2.0-S0003267018302824-mmc2.csv
181087	C1=CC(=CC=C1C2=C(C(=CC(=C2Cl)Cl)Cl)Cl)O	[M+H]+	163.97	Benzenoids	1-s2.0-S0003267018302824-mmc2.csv
23448	C1=CC(=CC=C1C2=C(C=C(C=C2)Cl)Cl)Cl	[M+H]+	149.67	Benzenoids	1-s2.0-S0003267018302824-mmc2.csv
105036	C1=CC(=CC=C1C2=C(C=C(C=C2Cl)Cl)Cl)O	[M+H]+	159.83	Benzenoids	1-s2.0-S0003267018302824-mmc2.csv
91653	C1=CC(=CC=C1C2=C(C=CC(=C2)Cl)Cl)O	[M+H]+	153.13	Benzenoids	1-s2.0-S0003267018302824-mmc2.csv
51043	C1=CC(=CC=C1C2=CC(=C(C(=C2)Cl)Cl)Cl)Cl	[M+H]+	158.57	Benzenoids	1-s2.0-S0003267018302824-mmc2.csv
53036	C1=CC(=CC=C1C2=CC(=C(C(=C2Cl)Cl)Cl)Cl)Cl	[M+H]+	162.13	Benzenoids	1-s2.0-S0003267018302824-mmc2.csv
105101	C1=CC(=CC=C1C2=CC(=C(C(=C2Cl)Cl)Cl)Cl)O	[M+H]+	163.67	Benzenoids	1-s2.0-S0003267018302824-mmc2.csv
91589	C1=CC(=CC=C1C2=CC=C(C=C2)Cl)O	[M+H]+	148.3	Benzenoids	1-s2.0-S0003267018302824-mmc2.csv
92347	C1=CC=C(C(=C1)C2=C(C=CC(=C2)Cl)Cl)O	[M+H]+	151.6	Benzenoids	1-s2.0-S0003267018302824-mmc2.csv
14274807	C1=CC=C(C(=C1)OC2=C(C=C(C=C2)Br)Br)Br	[M+H]+	160.63	Benzenoids	1-s2.0-S0003267018302824-mmc2.csv
79688	C1=CC=C(C=C1)C2=C(C=C(C=C2)O)Cl	[M+H]+	147.5	Benzenoids	1-s2.0-S0003267018302824-mmc2.csv
37247	C1=CC=C(C=C1)C2=C(C=C(C=C2Cl)Cl)Cl	[M+H]+	150.1	Benzenoids	1-s2.0-S0003267018302824-mmc2.csv
11827	C1=CC=C(C=C1)C2=C(C=CC(=C2)Cl)O	[M+H]+	144.03	Benzenoids	1-s2.0-S0003267018302824-mmc2.csv
70820	C1=CC=C(C=C1)C2=CC(=C(C(=C2)Cl)O)Cl	[M+H]+	151.5	Benzenoids	1-s2.0-S0003267018302824-mmc2.csv
7074	C1=CC=C(C=C1)C2=CC(=C(C=C2)O)Cl	[M+H]+	146.53	Benzenoids	1-s2.0-S0003267018302824-mmc2.csv
27514	C1=CC=C(C=C1)C2=CC(=C(C=C2Cl)Cl)Cl	[M+H]+	150.67	Benzenoids	1-s2.0-S0003267018302824-mmc2.csv
13766702	C1=CC=C(C=C1)OC2=C(C(=C(C(=C2Br)Br)Br)Br)Br	[M+H]+	172	Benzenoids	1-s2.0-S0003267018302824-mmc2.csv
6780	C1=CC=C2C(=C1)C(=O)C3=CC=CC=C3C2=O	[M+H]+	141.89	Benzenoids	1-s2.0-S0003267018302824-mmc2.csv
42030	C1=CC=C2C(=C1)C=C3C=CC4=C5C3=C2C=C(C5=CC=C4)O	[M+H]+	163.1	Benzenoids	1-s2.0-S0003267018302824-mmc2.csv
37766	C1=CC=C2C(=C1)C=CC3=C2C=C(C4=CC=CC=C34)O	[M+H]+	157.83	Benzenoids	1-s2.0-S0003267018302824-mmc2.csv
104987	C1=CC=C2C(=C1)C=CC3=C2C=C4C=CC=C5C4=C3C=C5	[M+H]+	155.08	Benzenoids	1-s2.0-S0003267018302824-mmc2.csv
104987	C1=CC=C2C(=C1)C=CC3=C2C=C4C=CC=C5C4=C3C=C5	[M]	152.68	Benzenoids	1-s2.0-S0003267018302824-mmc2.csv
185736	C1=CC=C2C(=C1)C=CC3=C2C4=C(C=C3)C5=CC=CC=C5C6=CC=CC=C64	[M+H]+	166.69	Benzenoids	1-s2.0-S0003267018302824-mmc2.csv
185736	C1=CC=C2C(=C1)C=CC3=C2C4=C(C=C3)C5=CC=CC=C5C6=CC=CC=C64	[M]	165.45	Benzenoids	1-s2.0-S0003267018302824-mmc2.csv
5889	C1=CC=C2C(=C1)C=CC3=CC4=C(C=CC5=CC=CC=C54)C=C32	[M+H]+	164.07	Benzenoids	1-s2.0-S0003267018302824-mmc2.csv
5889	C1=CC=C2C(=C1)C=CC3=CC4=C(C=CC5=CC=CC=C54)C=C32	[M]	162.87	Benzenoids	1-s2.0-S0003267018302824-mmc2.csv
9131	C1=CC=C2C(=C1)C3=C4C2=CC5=CC=CC6=C5C4=C(C=C6)C=C3	[M+H]+	159.65	Benzenoids	1-s2.0-S0003267018302824-mmc2.csv
9131	C1=CC=C2C(=C1)C3=C4C2=CC5=CC=CC6=C5C4=C(C=C6)C=C3	[M]	158.15	Benzenoids	1-s2.0-S0003267018302824-mmc2.csv
9170	C1=CC=C2C(=C1)C3=CC=CC=C3C4=CC=CC=C24	[M]	144.81	Benzenoids	1-s2.0-S0003267018302824-mmc2.csv
3023	C1=CC=C2C(=C1)C3=CC=CC=C3S2	[M]	132.3	Benzenoids	1-s2.0-S0003267018302824-mmc2.csv
6697	C1=CC=C2C(=C1)C3=CC=CC4=C3C(=CC=C4)C2=O	[M+H]+	145.71	Benzenoids	1-s2.0-S0003267018302824-mmc2.csv
6697	C1=CC=C2C(=C1)C3=CC=CC4=C3C(=CC=C4)C2=O	[M]	144.61	Benzenoids	1-s2.0-S0003267018302824-mmc2.csv
9154	C1=CC=C2C(=C1)C3=CC=CC4=C3C2=CC=C4	[M+H]+	138.84	Benzenoids	1-s2.0-S0003267018302824-mmc2.csv
9154	C1=CC=C2C(=C1)C3=CC=CC4=C3C2=CC=C4	[M]	138.34	Benzenoids	1-s2.0-S0003267018302824-mmc2.csv
7091	C1=CC=C2C=C(C(=CC2=C1)O)O	[M+H]+	131.73	Benzenoids	1-s2.0-S0003267018302824-mmc2.csv
14160	C1=CC=C2C=C3C(=CC2=C1)C(=O)C4=CC=CC=C4C3=O	[M+H]+	157.54	Benzenoids	1-s2.0-S0003267018302824-mmc2.csv
8418	C1=CC=C2C=C3C=CC=CC3=CC2=C1	[M]	133.1	Benzenoids	1-s2.0-S0003267018302824-mmc2.csv
9158	C1=CC=C2C=C3C4=CC=CC5=C4C(=CC=C5)C3=CC2=C1	[M+H]+	154.36	Benzenoids	1-s2.0-S0003267018302824-mmc2.csv
9158	C1=CC=C2C=C3C4=CC=CC5=C4C(=CC=C5)C3=CC2=C1	[M]	152.98	Benzenoids	1-s2.0-S0003267018302824-mmc2.csv
931	C1=CC=C2C=CC=CC2=C1	[M+H]+	120.28	Benzenoids	1-s2.0-S0003267018302824-mmc2.csv
931	C1=CC=C2C=CC=CC2=C1	[M]	118.84	Benzenoids	1-s2.0-S0003267018302824-mmc2.csv
9153	C1=CC=C2C3=C4C(=CC=C3)C5=CC=CC=C5C4=CC2=C1	[M]	151.95	Benzenoids	1-s2.0-S0003267018302824-mmc2.csv
2336	C1=CC=C2C3=C4C(=CC2=C1)C=CC5=C4C(=CC=C5)C=C3	[M+H]+	152.05	Benzenoids	1-s2.0-S0003267018302824-mmc2.csv
9108	C1=CC=C2C3=C4C(=CC2=C1)C=CC5=C4C(=CC6=CC=CC=C56)C=C3	[M+H]+	166.49	Benzenoids	1-s2.0-S0003267018302824-mmc2.csv
9108	C1=CC=C2C3=C4C(=CC2=C1)C=CC5=C4C(=CC6=CC=CC=C56)C=C3	[M]	165.22	Benzenoids	1-s2.0-S0003267018302824-mmc2.csv
93552	C1=CC2=C(C=CC(=C2)O)C=C1O	[M+H]+	137.47	Benzenoids	1-s2.0-S0003267018302824-mmc2.csv
6749	C1=CC2=C(C=CC=C2O)C(=C1)O	[M+H]+	133.63	Benzenoids	1-s2.0-S0003267018302824-mmc2.csv
6724	C1=CC2=C3C(=C1)C(=O)C(=O)C3=CC=C2	[M+H]+	144.02	Benzenoids	1-s2.0-S0003267018302824-mmc2.csv
160814	C1=CC2=C3C(=C1)C(=O)C(=O)C4=CC=CC(=C43)C=C2	[M+H]+	144.3	Benzenoids	1-s2.0-S0003267018302824-mmc2.csv
11050	C1=CC2=C3C(=C1)C=CC(=O)C3=CC=C2	[M+H]+	134.59	Benzenoids	1-s2.0-S0003267018302824-mmc2.csv
9161	C1=CC2=C3C(=C1)C=CC3=CC=C2	[M+H]+	125.71	Benzenoids	1-s2.0-S0003267018302824-mmc2.csv
21387	C1=CC2=C3C(=C1)C=CC4=C(C=CC(=C43)C=C2)O	[M+H]+	148.47	Benzenoids	1-s2.0-S0003267018302824-mmc2.csv
37880	C1=CC2=C3C(=C1)C=CC4=C3C(=CC5=C4C=CC=C5O)C=C2	[M+H]+	163.2	Benzenoids	1-s2.0-S0003267018302824-mmc2.csv
31423	C1=CC2=C3C(=C1)C=CC4=CC=CC(=C43)C=C2	[M+H]+	137.97	Benzenoids	1-s2.0-S0003267018302824-mmc2.csv
31423	C1=CC2=C3C(=C1)C=CC4=CC=CC(=C43)C=C2	[M]	137.5	Benzenoids	1-s2.0-S0003267018302824-mmc2.csv
9117	C1=CC2=C3C(=C1)C4=CC=CC5=C4C6=C(C=C5)C=CC(=C36)C=C2	[M+H]+	157.31	Benzenoids	1-s2.0-S0003267018302824-mmc2.csv
9117	C1=CC2=C3C(=C1)C4=CC=CC5=C4C6=C(C=C5)C=CC(=C36)C=C2	[M]	155.83	Benzenoids	1-s2.0-S0003267018302824-mmc2.csv
9115	C1=CC2=C3C4=C1C=CC5=C4C6=C(C=C5)C=CC7=C6C3=C(C=C2)C=C7	[M]	161.87	Benzenoids	1-s2.0-S0003267018302824-mmc2.csv
6853	C1C2=CC=CC=C2C3=CC=CC=C31	[M]	130.9	Benzenoids	1-s2.0-S0003267018302824-mmc2.csv
6734	C1CC2=CC=CC3=C2C1=CC=C3	[M]	128.5	Benzenoids	1-s2.0-S0003267018302824-mmc2.csv
11317	CC1=C(C2=CC=CC=C2C=C1)C	[M+H]+	130.93	Benzenoids	1-s2.0-S0003267018302824-mmc2.csv
11317	CC1=C(C2=CC=CC=C2C=C1)C	[M]	128.35	Benzenoids	1-s2.0-S0003267018302824-mmc2.csv
13068	CC1=C2C=CC=CC2=CC3=CC=CC=C13	[M]	136.43	Benzenoids	1-s2.0-S0003267018302824-mmc2.csv
13257	CC1=C2C=CC3=CC=CC=C3C2=CC=C1	[M]	137.83	Benzenoids	1-s2.0-S0003267018302824-mmc2.csv
7002	CC1=CC=CC2=CC=CC=C12	[M+H]+	125.2	Benzenoids	1-s2.0-S0003267018302824-mmc2.csv
7002	CC1=CC=CC2=CC=CC=C12	[M]	123.49	Benzenoids	1-s2.0-S0003267018302824-mmc2.csv
11396	CC1=CC2=C(C=C1)C=CC(=C2)C	[M+H]+	131	Benzenoids	1-s2.0-S0003267018302824-mmc2.csv
15304	CC1=CC2=C(C=C1)C=CC3=C2C=C(C=C3)C	[M+H]+	145.58	Benzenoids	1-s2.0-S0003267018302824-mmc2.csv
15304	CC1=CC2=C(C=C1)C=CC3=C2C=C(C=C3)C	[M]	144.44	Benzenoids	1-s2.0-S0003267018302824-mmc2.csv
11328	CC1=CC2=CC=CC(=C2C=C1)C	[M+H]+	130.13	Benzenoids	1-s2.0-S0003267018302824-mmc2.csv
11328	CC1=CC2=CC=CC(=C2C=C1)C	[M]	127.82	Benzenoids	1-s2.0-S0003267018302824-mmc2.csv
7055	CC1=CC2=CC=CC=C2C=C1	[M+H]+	124.57	Benzenoids	1-s2.0-S0003267018302824-mmc2.csv
7055	CC1=CC2=CC=CC=C2C=C1	[M]	123.19	Benzenoids	1-s2.0-S0003267018302824-mmc2.csv
11936	CC1=CC2=CC3=CC=CC=C3C=C2C=C1	[M+H]+	138.61	Benzenoids	1-s2.0-S0003267018302824-mmc2.csv
11936	CC1=CC2=CC3=CC=CC=C3C=C2C=C1	[M]	137.27	Benzenoids	1-s2.0-S0003267018302824-mmc2.csv
69170	CC1=CC2=CC3=CC=CC=C3C=C2C=C1C	[M+H]+	146.15	Benzenoids	1-s2.0-S0003267018302824-mmc2.csv
529436	CC1CCCC2=C(C=C(C=C12)C)C	[M]	134.67	Benzenoids	1-s2.0-S0003267018302824-mmc2.csv
3037582	[C@@H]([C@@H]([C@H](C(=O)O)O)O)([C@@H](C(=O)O)O)O	[M-H]	132.9	Organic oxygen compounds	20190304JAP_CCSdatabase_final.csv
447315	[C@@H]([C@@H](C(=O)O)O)(C(=O)O)O	[M-H]	118.4	Organic acids and derivatives	20190304JAP_CCSdatabase_final.csv
444305	[C@@H]([C@H](C(=O)O)O)(C(=O)O)O	[M-H]	118.3	Organic acids and derivatives	20190304JAP_CCSdatabase_final.csv
445929	[C@@H]1([C@H]([C@H](O[C@@H]([C@@H]1O)O)C(=O)O)O)O	[M-H]	131.4	Organic oxygen compounds	20190304JAP_CCSdatabase_final.csv
439655	[C@H]([C@@H](C(=O)O)O)(C(=O)O)O	[M-H]	118.3	Organic acids and derivatives	20190304JAP_CCSdatabase_final.csv
16219611	[Li].CC(=CC(=O)SCCNC(=O)CCNC(=O)C(C(C)(C)COP(=O)(O)OP(=O)(O)OCC1C(C(C(O1)N2C=NC3=C(N=CN=C32)N)O)OP(=O)(O)O)O)C	[M-H]	256.4	Organoheterocyclic compounds	20190304JAP_CCSdatabase_final.csv
16219611	[Li].CC(=CC(=O)SCCNC(=O)CCNC(=O)C(C(C)(C)COP(=O)(O)OP(=O)(O)OCC1C(C(C(O1)N2C=NC3=C(N=CN=C32)N)O)OP(=O)(O)O)O)C	[M+H]	256	Organoheterocyclic compounds	20190304JAP_CCSdatabase_final.csv
129011240	[Li+].C([C@H]([C@@H]([C@H](C=O)O)O)O)OP(=O)(O)O	[M-H]	138.9	Organic oxygen compounds	20190304JAP_CCSdatabase_final.csv
444212	C(/C(=C\C(=O)O)/C(=O)O)C(=O)O	[M-H]	131.4	Organic acids and derivatives	20190304JAP_CCSdatabase_final.csv
444212	C(/C(=C\C(=O)O)/C(=O)O)C(=O)O	[M+H]	152	Organic acids and derivatives	20190304JAP_CCSdatabase_final.csv
6602426	C([C@@H]([C@@H]([C@H](C(=O)O)O)O)O)O	[M-H]	127.9	Organic oxygen compounds	20190304JAP_CCSdatabase_final.csv
161227	C([C@@H]([C@@H](CO)O)O)C(=O)C(=O)O	[M-H]	133.9	Organic oxygen compounds	20190304JAP_CCSdatabase_final.csv
3080745	C([C@@H]([C@@H](COP(=O)(O)O)O)O)C(=O)C(=O)O	[M-H]	143.6	Organic oxygen compounds	20190304JAP_CCSdatabase_final.csv
439373	C([C@@H]([C@@H]1[C@@H]([C@@H](C(=O)O1)O)O)O)O	[M-H]	129.9	Organic oxygen compounds	20190304JAP_CCSdatabase_final.csv
54670067	C([C@@H]([C@@H]1C(=C(C(=O)O1)O)O)O)O	[M-H]	127.9	Lipids and lipid-like molecules	20190304JAP_CCSdatabase_final.csv
440667	C([C@@H]([C@@H]1C(=O)C(=O)C(=O)O1)O)O	[M-H]	128.2	Lipids and lipid-like molecules	20190304JAP_CCSdatabase_final.csv
5460407	C([C@@H]([C@H](C(=O)O)O)O)O	[M-H]	121.8	Organic acids and derivatives	20190304JAP_CCSdatabase_final.csv
5460407	C([C@@H]([C@H](C(=O)O)O)O)O	[M+H]	136.1	Organic acids and derivatives	20190304JAP_CCSdatabase_final.csv
439255	C([C@@H](C([C@H](CO)O)O)O)O	[M-H]	125.2	Organic oxygen compounds	20190304JAP_CCSdatabase_final.csv
6267	C([C@@H](C(=O)O)N)C(=O)N	[M-H]	124.2	Organic acids and derivatives	20190304JAP_CCSdatabase_final.csv
6267	C([C@@H](C(=O)O)N)C(=O)N	[M+H]	130.7	Organic acids and derivatives	20190304JAP_CCSdatabase_final.csv
5960	C([C@@H](C(=O)O)N)C(=O)O	[M-H]	119.8	Organic acids and derivatives	20190304JAP_CCSdatabase_final.csv
5960	C([C@@H](C(=O)O)N)C(=O)O	[M-H]	120.1	Organic acids and derivatives	20190304JAP_CCSdatabase_final.csv
5951	C([C@@H](C(=O)O)N)O	[M-H]	136.2	Organic acids and derivatives	20190304JAP_CCSdatabase_final.csv
68841	C([C@@H](C(=O)O)N)OP(=O)(O)O	[M-H]	127.8	Organic acids and derivatives	20190304JAP_CCSdatabase_final.csv
5862	C([C@@H](C(=O)O)N)S	[M-H]	144	Organic acids and derivatives	20190304JAP_CCSdatabase_final.csv
5862	C([C@@H](C(=O)O)N)S	[M+H]	148.6	Organic acids and derivatives	20190304JAP_CCSdatabase_final.csv
12308854	C([C@@H](C(=O)O)N)S(=O)(=O)O.O	[M-H]	123.3	Organic acids and derivatives	20190304JAP_CCSdatabase_final.csv
12308854	C([C@@H](C(=O)O)N)S(=O)(=O)O.O	[M+H]	140.3	Organic acids and derivatives	20190304JAP_CCSdatabase_final.csv
193653	C([C@@H](C(=O)O)N)SCC(=O)O	[M-H]	130	Organic acids and derivatives	20190304JAP_CCSdatabase_final.csv
193653	C([C@@H](C(=O)O)N)SCC(=O)O	[M+H]	137.1	Organic acids and derivatives	20190304JAP_CCSdatabase_final.csv
67678	C([C@@H](C(=O)O)N)SSC[C@@H](C(=O)O)N	[M-H]	143.3	Organic acids and derivatives	20190304JAP_CCSdatabase_final.csv
67678	C([C@@H](C(=O)O)N)SSC[C@@H](C(=O)O)N	[M-H]	144	Organic acids and derivatives	20190304JAP_CCSdatabase_final.csv
67678	C([C@@H](C(=O)O)N)SSC[C@@H](C(=O)O)N	[M+H]	149.1	Organic acids and derivatives	20190304JAP_CCSdatabase_final.csv
67678	C([C@@H](C(=O)O)N)SSC[C@@H](C(=O)O)N	[M+H]	149.8	Organic acids and derivatives	20190304JAP_CCSdatabase_final.csv
439918	C([C@@H](C(=O)O)N=C(N)N)C(=O)O	[M-H]	130.4	Organic acids and derivatives	20190304JAP_CCSdatabase_final.csv
439918	C([C@@H](C(=O)O)N=C(N)N)C(=O)O	[M+H]	136.9	Organic acids and derivatives	20190304JAP_CCSdatabase_final.csv
11333	C([C@@H]1[C@@H]([C@@H]([C@H]([C@@H](O1)O[C@@H]2[C@H](O[C@@]([C@H]2O)(CO)O)CO)O)O)O)O	[M-H]	177.7	Organic oxygen compounds	20190304JAP_CCSdatabase_final.csv
104938	C([C@@H]1[C@@H]([C@@H]([C@H]([C@@H](O1)O[C@@H]2[C@H](O[C@@H]([C@@H]([C@H]2O)O)O)CO)O)O)O)O.O	[M-H]	176.8	Organic oxygen compounds	20190304JAP_CCSdatabase_final.csv
439531	C([C@@H]1[C@@H]([C@@H]([C@H]([C@H](O1)OC[C@@H]2[C@@H]([C@@H]([C@H]([C@H](O2)OC[C@@H]3[C@H]([C@@H]([C@H]([C@H](O3)O[C@]4([C@H]([C@@H]([C@H](O4)CO)O)O)CO)O)O)O)O)O)O)O)O)O)O	[M-H]	223.8	Organic oxygen compounds	20190304JAP_CCSdatabase_final.csv
439242	C([C@@H]1[C@@H]([C@@H]([C@H]([C@H](O1)OC[C@@H]2[C@H]([C@@H]([C@H]([C@H](O2)O[C@]3([C@H]([C@@H]([C@H](O3)CO)O)O)CO)O)O)O)O)O)O)O	[M-H]	197	Organic oxygen compounds	20190304JAP_CCSdatabase_final.csv
440658	C([C@@H]1[C@@H]([C@@H]([C@H]([C@H](O1)OC[C@@H]2[C@H]([C@@H]([C@H](C(O2)O)O)O)O)O)O)O)O	[M-H]	178	Organic oxygen compounds	20190304JAP_CCSdatabase_final.csv
440658	C([C@@H]1[C@@H]([C@@H]([C@H]([C@H](O1)OC[C@@H]2[C@H]([C@@H]([C@H](C(O2)O)O)O)O)O)O)O)O	[M+H]	180.3	Organic oxygen compounds	20190304JAP_CCSdatabase_final.csv
87916	C([C@@H]1[C@@H]([C@@H]([C@H]([C@H](O1)OP(=O)([O-])[O-])O)O)O)O.[K+].[K+]	[M-H]	148.2	Organic oxygen compounds	20190304JAP_CCSdatabase_final.csv
126963632	C([C@@H]1[C@H]([C@@H]([C@@H]([C@H](O1)O[C@H]2[C@@H]([C@H](O[C@@]2(CO)O[C@@H]3[C@@H]([C@H]([C@@H]([C@H](O3)CO)O)O)O)CO)O)O)O)O)O.O	[M-H]	202.8	Organic oxygen compounds	20190304JAP_CCSdatabase_final.csv
65127	C([C@@H]1[C@H]([C@@H]([C@@H](C(O1)O)O)O)O)OP(=O)(O)O	[M-H]	146.2	Organic oxygen compounds	20190304JAP_CCSdatabase_final.csv
441477	C([C@@H]1[C@H]([C@@H]([C@H]([C@@H](O1)O)N)O)O)O	[M+H]	134.7	Organic oxygen compounds	20190304JAP_CCSdatabase_final.csv
72361	C([C@@H]1[C@H]([C@@H]([C@H]([C@@H](O1)O)N)O)O)OS(=O)(=O)O	[M-H]	149.5	Organic oxygen compounds	20190304JAP_CCSdatabase_final.csv
92797	C([C@@H]1[C@H]([C@@H]([C@H]([C@@H](O1)O[C@@H](C=O)[C@H]([C@@H]([C@@H](CO)O)O)O)O)O)O)O	[M-H]	186.5	Organic oxygen compounds	20190304JAP_CCSdatabase_final.csv
10712	C([C@@H]1[C@H]([C@@H]([C@H]([C@@H](O1)O[C@@H]2[C@H](O[C@H]([C@@H]([C@H]2O)O)O)CO)O)O)O)O	[M-H]	179.7	Organic oxygen compounds	20190304JAP_CCSdatabase_final.csv
52940142	C([C@@H]1[C@H]([C@@H]([C@H]([C@@H](O1)O[C@@H]2[C@H](O[C@H]([C@@H]([C@H]2O)O)O[C@@H]3[C@H](O[C@H]([C@@H]([C@H]3O)O)O[C@@H]4[C@H](O[C@H]([C@@H]([C@H]4O)O)O[C@H]([C@@H](CO)O)[C@@H]([C@H](C=O)O)O)CO)CO)CO)O)O)O)O	[M-H]	246.4	Organic oxygen compounds	20190304JAP_CCSdatabase_final.csv
52940142	C([C@@H]1[C@H]([C@@H]([C@H]([C@@H](O1)O[C@@H]2[C@H](O[C@H]([C@@H]([C@H]2O)O)O[C@@H]3[C@H](O[C@H]([C@@H]([C@H]3O)O)O[C@@H]4[C@H](O[C@H]([C@@H]([C@H]4O)O)O[C@H]([C@@H](CO)O)[C@@H]([C@H](C=O)O)O)CO)CO)CO)O)O)O)O	[M+H]	250.4	Organic oxygen compounds	20190304JAP_CCSdatabase_final.csv
441422	C([C@@H]1[C@H]([C@@H]([C@H]([C@@H](O1)OC[C@@H]2[C@H]([C@@H]([C@H]([C@@H](O2)O)O)O)O)O)O)O)O	[M-H]	180.2	Organic oxygen compounds	20190304JAP_CCSdatabase_final.csv
5460935	C([C@@H]1[C@H]([C@@H]([C@H]([C@H](O1)O[C@@H]([C@@H]([C@@H](CO)O)O)C(=O)CO)O)O)O)O	[M-H]	178.4	Organic oxygen compounds	20190304JAP_CCSdatabase_final.csv
7427	C([C@@H]1[C@H]([C@@H]([C@H]([C@H](O1)O[C@@H]2[C@@H]([C@H]([C@@H]([C@H](O2)CO)O)O)O)O)O)O)O	[M-H]	169.9	Organic oxygen compounds	20190304JAP_CCSdatabase_final.csv
13489094	C([C@@H]1[C@H]([C@@H]([C@H]([C@H](O1)O[C@@H]2[C@H](O[C@@H]([C@@H]([C@H]2O)O)O[C@@H]3[C@H](O[C@@H]([C@@H]([C@H]3O)O)O[C@@H]4[C@H](O[C@@H]([C@@H]([C@H]4O)O)O[C@@H]5[C@H](O[C@@H]([C@@H]([C@H]5O)O)O)CO)CO)CO)CO)O)O)O)O	[M-H]	256.4	Organic oxygen compounds	20190304JAP_CCSdatabase_final.csv
6255	C([C@@H]1[C@H]([C@@H]([C@H]([C@H](O1)O[C@@H]2[C@H](O[C@H]([C@@H]([C@H]2O)O)O)CO)O)O)O)O	[M-H]	190.9	Organic oxygen compounds	20190304JAP_CCSdatabase_final.csv
5988	C([C@@H]1[C@H]([C@@H]([C@H]([C@H](O1)O[C@]2([C@H]([C@@H]([C@H](O2)CO)O)O)CO)O)O)O)O	[M-H]	168.2	Organic oxygen compounds	20190304JAP_CCSdatabase_final.csv
440080	C([C@@H]1[C@H]([C@@H]([C@H]([C@H](O1)O[C@]2([C@H]([C@@H]([C@H](O2)CO)O)O)CO[C@]3([C@H]([C@@H]([C@H](O3)CO)O)O)CO)O)O)O)O	[M-H]	204.1	Organic oxygen compounds	20190304JAP_CCSdatabase_final.csv
67584262	C([C@@H]1[C@H]([C@@H]([C@H]([C@H](O1)O[C@H]([C@@H](CO)O)[C@@H](C(=O)CO)O)O)O)O)O.O	[M-H]	180	Organic oxygen compounds	20190304JAP_CCSdatabase_final.csv
439193	C([C@@H]1[C@H]([C@@H]([C@H]([C@H](O1)OC[C@@H]2[C@H]([C@@H]([C@H](C(O2)O)O)O)O)O)O)O)O	[M-H]	180.1	Organic oxygen compounds	20190304JAP_CCSdatabase_final.csv
52994241	C([C@@H]1[C@H]([C@@H]([C@H]([C@H](O1)OC[C@@H]2[C@H]([C@@H](C(O2)(CO)O)O)O)O)O)O)O.O	[M-H]	175.4	Organic oxygen compounds	20190304JAP_CCSdatabase_final.csv
16213556	C([C@@H]1[C@H]([C@@H]([C@H]([C@H](O1)OP(=O)([O-])[O-])O)O)O)O.O.O.O.O.[Na+].[Na+]	[M-H]	149.4	Organic oxygen compounds	20190304JAP_CCSdatabase_final.csv
65533	C([C@@H]1[C@H]([C@@H]([C@H]([C@H](O1)OP(=O)(O)O)O)O)O)O	[M-H]	150.5	Organic oxygen compounds	20190304JAP_CCSdatabase_final.csv
	C([C@@H]1[C@H]([C@@H]([C@H](C(O1)O)N)O)O)O	[M+H]	138.3	Organic oxygen compounds	20190304JAP_CCSdatabase_final.csv
	C([C@@H]1[C@H]([C@@H]([C@H](C(O1)O)N)O)O)O	[M+H]	141.5	Organic oxygen compounds	20190304JAP_CCSdatabase_final.csv
440997	C([C@@H]1[C@H]([C@@H]([C@H](C(O1)O)N)O)O)OP(=O)(O)O	[M-H]	150.3	Organic oxygen compounds	20190304JAP_CCSdatabase_final.csv
440997	C([C@@H]1[C@H]([C@@H]([C@H](C(O1)O)N)O)O)OP(=O)(O)O	[M+H]	155.6	Organic oxygen compounds	20190304JAP_CCSdatabase_final.csv
5958	C([C@@H]1[C@H]([C@@H]([C@H](C(O1)O)O)O)O)OP(=O)(O)O	[M-H]	146.7	Organic oxygen compounds	20190304JAP_CCSdatabase_final.csv
439394	C([C@@H]1[C@H]([C@@H](C(O1)(COP(=O)(O)O)O)O)O)O	[M-H]	146.3	Organic oxygen compounds	20190304JAP_CCSdatabase_final.csv
441483	C([C@@H]1[C@H]([C@H]([C@@H]([C@](O1)(CO)O)O)O)O)O	[M-H]	145	Organic oxygen compounds	20190304JAP_CCSdatabase_final.csv
16211858	C([C@@H]1[C@H]([C@H](C(O1)O)O)O)OP(=O)([O-])[O-].O.O.[Na+].[Na+]	[M-H]	141.2	Organic oxygen compounds	20190304JAP_CCSdatabase_final.csv
11850	C([C@H]([C@@H]([C@@H]([C@H](CO)O)O)O)O)O	[M-H]	130.8	Organic oxygen compounds	20190304JAP_CCSdatabase_final.csv
9899264	C([C@H]([C@H]([C@@H]([C@@H](C=O)N)O)O)O)O.Cl	[M+H]	138	Organic oxygen compounds	20190304JAP_CCSdatabase_final.csv
6251	C([C@H]([C@H]([C@@H]([C@@H](CO)O)O)O)O)O	[M-H]	131.9	Organic oxygen compounds	20190304JAP_CCSdatabase_final.csv
84687	C([C@H]([C@H]([C@@H]([C@H](C(=O)[O-])O)O)O)O)O.[Na+]	[M-H]	132.6	Organic oxygen compounds	20190304JAP_CCSdatabase_final.csv
73563	C([C@H]([C@H]([C@@H]([C@H](C(=O)O)N)O)O)O)O	[M-H]	136.1	Organic oxygen compounds	20190304JAP_CCSdatabase_final.csv
73563	C([C@H]([C@H]([C@@H]([C@H](C(=O)O)N)O)O)O)O	[M+H]	141.8	Organic oxygen compounds	20190304JAP_CCSdatabase_final.csv
10690	C([C@H]([C@H]([C@@H]([C@H](C(=O)O)O)O)O)O)O	[M-H]	133.2	Organic oxygen compounds	20190304JAP_CCSdatabase_final.csv
10690	C([C@H]([C@H]([C@@H]([C@H](C(=O)O)O)O)O)O)O	[M+H]	141	Organic oxygen compounds	20190304JAP_CCSdatabase_final.csv
91493	C([C@H]([C@H]([C@@H]([C@H](C(=O)O)O)O)O)O)OP(=O)(O)O	[M-H]	145.2	Organic oxygen compounds	20190304JAP_CCSdatabase_final.csv
5780	C([C@H]([C@H]([C@@H]([C@H](CO)O)O)O)O)O	[M-H]	131.9	Organic oxygen compounds	20190304JAP_CCSdatabase_final.csv
16217552	C([C@H]([C@H]([C@@H](C(=O)C(=O)[O-])O)O)O)O.C([C@H]([C@H]([C@@H](C(=O)C(=O)[O-])O)O)O)O.O.[Ca+2]	[M-H]	133	Organic oxygen compounds	20190304JAP_CCSdatabase_final.csv
22812950	C([C@H]([C@H]([C@@H](C(=O)CO)O)O)O)OP(=O)([O-])[O-].[Na+].[Na+]	[M-H]	146.1	Organic oxygen compounds	20190304JAP_CCSdatabase_final.csv
22812950	C([C@H]([C@H]([C@@H](C(=O)CO)O)O)O)OP(=O)([O-])[O-].[Na+].[Na+]	[M-H]	144.3	Organic oxygen compounds	20190304JAP_CCSdatabase_final.csv
15756092	C([C@H]([C@H](C(=O)CO)O)O)OP(=O)([O-])[O-].[Na+].[Na+]	[M-H]	140.4	Organic oxygen compounds	20190304JAP_CCSdatabase_final.csv
	C([C@H](C([C@H](CO)O)O)O)O	[M-H]	126.2	Organic oxygen compounds	20190304JAP_CCSdatabase_final.csv
	C([C@H](C([C@H](CO)O)O)O)O	[M-H]	126.1	Organic oxygen compounds	20190304JAP_CCSdatabase_final.csv
16219906	C([C@H](C(=O)[O-])O)OP(=O)(O)[O-].[Na+].[Na+]	[M-H]	124.8	Organic oxygen compounds	20190304JAP_CCSdatabase_final.csv
16219906	C([C@H](C(=O)[O-])O)OP(=O)(O)[O-].[Na+].[Na+]	[M+H]	136.3	Organic oxygen compounds	20190304JAP_CCSdatabase_final.csv
	C([C@H](C(=O)[O-])OP(=O)([O-])[O-])O.[Na+].[Na+].[Na+]	[M-H]	127	Organic oxygen compounds	20190304JAP_CCSdatabase_final.csv
83887	C([C@H](C(=O)O)N)C(=O)O	[M-H]	120.1	Organic acids and derivatives	20190304JAP_CCSdatabase_final.csv
	C([C@H](C(=O)O)O)C(=O)O	[M-H]	116.3	Organic acids and derivatives	20190304JAP_CCSdatabase_final.csv
439194	C([C@H](C(=O)O)O)O	[M-H]	112.8	Organic acids and derivatives	20190304JAP_CCSdatabase_final.csv
	C(=C\C(=O)O)\C(=O)O	[M-H]	112.5	Organic acids and derivatives	20190304JAP_CCSdatabase_final.csv
71299604	C(=O)(C(F)(F)F)[O-].[NH2+]	[M-H]	108.4	Organic acids and derivatives	20190304JAP_CCSdatabase_final.csv
24892836	C(=O)[C@@H]([C@H]([C@@H]([C@@H](C(=O)[O-])O)O)O)O.O.[Na+]	[M-H]	131.8	Organic oxygen compounds	20190304JAP_CCSdatabase_final.csv
65041	C(=O)[C@@H]([C@H]([C@@H]([C@@H](C(=O)O)O)O)O)O	[M-H]	133.8	Organic oxygen compounds	20190304JAP_CCSdatabase_final.csv
71474	C(C(=O)[O-])C(CC(=O)[O-])(C(=O)[O-])O.O.O.[Na+].[Na+].[Na+]	[M-H]	129	Organic acids and derivatives	20190304JAP_CCSdatabase_final.csv
311	C(C(=O)O)C(CC(=O)O)(C(=O)O)O	[M-H]	127.4	Organic acids and derivatives	20190304JAP_CCSdatabase_final.csv
763	C(C(=O)O)N=C(N)N	[M+H]	125.4	Organic acids and derivatives	20190304JAP_CCSdatabase_final.csv
3496	C(C(=O)O)NCP(=O)(O)O	[M-H]	128.6	Organic acids and derivatives	20190304JAP_CCSdatabase_final.csv
16219408	C(C(C(=O)[O-])O)O.C(C(C(=O)[O-])O)O.O.O.[Ca+2]	[M-H]	112.8	Organic acids and derivatives	20190304JAP_CCSdatabase_final.csv
108638	C(C(C(=O)O)N)N.Cl	[M-H]	118.5	Organic acids and derivatives	20190304JAP_CCSdatabase_final.csv
108638	C(C(C(=O)O)N)N.Cl	[M+H]	138.1	Organic acids and derivatives	20190304JAP_CCSdatabase_final.csv
109	C(C(C(=O)O)N)S(=O)O	[M+H]	133.4	Organic acids and derivatives	20190304JAP_CCSdatabase_final.csv
	C(C(C(=O)O)O)C(=O)O	[M-H]	116.3	Organic acids and derivatives	20190304JAP_CCSdatabase_final.csv
59	C(C(C(=O)O)OP(=O)(O)O)O	[M-H]	124.4	Organic oxygen compounds	20190304JAP_CCSdatabase_final.csv
59	C(C(C(=O)O)OP(=O)(O)O)O	[M+H]	134.4	Organic oxygen compounds	20190304JAP_CCSdatabase_final.csv
168942	C(C(C(C(=O)[O-])O)C(=O)[O-])C(=O)[O-].[Na+].[Na+].[Na+]	[M-H]	127.3	Organic acids and derivatives	20190304JAP_CCSdatabase_final.csv
54606561	C(C(C(C(=O)O)O)O)(C(C(=O)O)O)O.[K+]	[M-H]	133.4	Organic oxygen compounds	20190304JAP_CCSdatabase_final.csv
45075663	C(C(C(C(C(C(C(C(C(F)F)(F)F)(F)F)(F)F)(F)F)(F)F)(F)F)(F)F)OP1(=NP(=NP(=N1)(OCC(C(C(C(C(C(C(C(F)F)(F)F)(F)F)(F)F)(F)F)(F)F)(F)F)(F)F)OCC(C(C(C(C(C(C(C(F)F)(F)F)(F)F)(F)F)(F)F)(F)F)(F)F)(F)F)(OCC(C(C(C(C(C(C(C(F)F)(F)F)(F)F)(F)F)(F)F)(F)F)(F)F)(F)F)OCC(C(C(C(C(C(C(C(F)F)(F)F)(F)F)(F)F)(F)F)(F)F)(F)F)(F)F)OCC(C(C(C(C(C(C(C(F)F)(F)F)(F)F)(F)F)(F)F)(F)F)(F)F)(F)F	[M+H]	441.2	Organoheterocyclic compounds	20190304JAP_CCSdatabase_final.csv
45075663	C(C(C(C(C(C(C(C(C(F)F)(F)F)(F)F)(F)F)(F)F)(F)F)(F)F)(F)F)OP1(=NP(=NP(=N1)(OCC(C(C(C(C(C(C(C(F)F)(F)F)(F)F)(F)F)(F)F)(F)F)(F)F)(F)F)OCC(C(C(C(C(C(C(C(F)F)(F)F)(F)F)(F)F)(F)F)(F)F)(F)F)(F)F)(OCC(C(C(C(C(C(C(C(F)F)(F)F)(F)F)(F)F)(F)F)(F)F)(F)F)(F)F)OCC(C(C(C(C(C(C(C(F)F)(F)F)(F)F)(F)F)(F)F)(F)F)(F)F)(F)F)OCC(C(C(C(C(C(C(C(F)F)(F)F)(F)F)(F)F)(F)F)(F)F)(F)F)(F)F	[M+H]	439.8	Organoheterocyclic compounds	20190304JAP_CCSdatabase_final.csv
2775073	C(C(C(C(C(C(C(F)F)(F)F)(F)F)(F)F)(F)F)(F)F)OP1(=NP(=NP(=N1)(OCC(C(C(C(C(C(F)F)(F)F)(F)F)(F)F)(F)F)(F)F)OCC(C(C(C(C(C(F)F)(F)F)(F)F)(F)F)(F)F)(F)F)(OCC(C(C(C(C(C(F)F)(F)F)(F)F)(F)F)(F)F)(F)F)OCC(C(C(C(C(C(F)F)(F)F)(F)F)(F)F)(F)F)(F)F)OCC(C(C(C(C(C(F)F)(F)F)(F)F)(F)F)(F)F)(F)F	[M+H]	382.7	Organoheterocyclic compounds	20190304JAP_CCSdatabase_final.csv
2775073	C(C(C(C(C(C(C(F)F)(F)F)(F)F)(F)F)(F)F)(F)F)OP1(=NP(=NP(=N1)(OCC(C(C(C(C(C(F)F)(F)F)(F)F)(F)F)(F)F)(F)F)OCC(C(C(C(C(C(F)F)(F)F)(F)F)(F)F)(F)F)(F)F)(OCC(C(C(C(C(C(F)F)(F)F)(F)F)(F)F)(F)F)(F)F)OCC(C(C(C(C(C(F)F)(F)F)(F)F)(F)F)(F)F)(F)F)OCC(C(C(C(C(C(F)F)(F)F)(F)F)(F)F)(F)F)(F)F	[M+H]	383	Organoheterocyclic compounds	20190304JAP_CCSdatabase_final.csv
16219416	C(C(C(C(C(C=O)N)O)O)O)OP(=O)(O)O.[Na]	[M-H]	148.2	Organic oxygen compounds	20190304JAP_CCSdatabase_final.csv
2775070	C(C(C(C(C(F)F)(F)F)(F)F)(F)F)OP1(=NP(=NP(=N1)(OCC(C(C(C(F)F)(F)F)(F)F)(F)F)OCC(C(C(C(F)F)(F)F)(F)F)(F)F)(OCC(C(C(C(F)F)(F)F)(F)F)(F)F)OCC(C(C(C(F)F)(F)F)(F)F)(F)F)OCC(C(C(C(F)F)(F)F)(F)F)(F)F	[M+H]	316.5	Organoheterocyclic compounds	20190304JAP_CCSdatabase_final.csv
2775070	C(C(C(C(C(F)F)(F)F)(F)F)(F)F)OP1(=NP(=NP(=N1)(OCC(C(C(C(F)F)(F)F)(F)F)(F)F)OCC(C(C(C(F)F)(F)F)(F)F)(F)F)(OCC(C(C(C(F)F)(F)F)(F)F)(F)F)OCC(C(C(C(F)F)(F)F)(F)F)(F)F)OCC(C(C(C(F)F)(F)F)(F)F)(F)F	[M+H]	318.9	Organoheterocyclic compounds	20190304JAP_CCSdatabase_final.csv
22646445	C(C(C(C(C=O)O)O)O)OP(=O)([O-])[O-].[Na+].[Na+]	[M-H]	139.4	Organic oxygen compounds	20190304JAP_CCSdatabase_final.csv
74764317	C(C(C(C=O)O)O)OP(=O)(O)[O-].[Na+]	[M-H]	148.7	Organic oxygen compounds	20190304JAP_CCSdatabase_final.csv
2775076	C(C(C(F)F)(F)F)OP1(=NP(=NP(=N1)(OCC(C(F)F)(F)F)OCC(C(F)F)(F)F)(OCC(C(F)F)(F)F)OCC(C(F)F)(F)F)OCC(C(F)F)(F)F	[M+H]	243.5	Organoheterocyclic compounds	20190304JAP_CCSdatabase_final.csv
2775076	C(C(C(F)F)(F)F)OP1(=NP(=NP(=N1)(OCC(C(F)F)(F)F)OCC(C(F)F)(F)F)(OCC(C(F)F)(F)F)OCC(C(F)F)(F)F)OCC(C(F)F)(F)F	[M+H]	243.9	Organoheterocyclic compounds	20190304JAP_CCSdatabase_final.csv
44828775	C(C(C[O-])OP(=O)(O)O)[O-].O.[Na+].[Na+]	[M-H]	126.5	Organic acids and derivatives	20190304JAP_CCSdatabase_final.csv
44717242	C(C(F)F)OP1(=NP(=NP(=N1)(OCC(F)F)OCC(F)F)(OCC(F)F)OCC(F)F)OCC(F)F	[M+H]	202.8	Organoheterocyclic compounds	20190304JAP_CCSdatabase_final.csv
44717242	C(C(F)F)OP1(=NP(=NP(=N1)(OCC(F)F)OCC(F)F)(OCC(F)F)OCC(F)F)OCC(F)F	[M+H]	203	Organoheterocyclic compounds	20190304JAP_CCSdatabase_final.csv
	C(C[C@@H](C(=O)O)N)[C@H](CN)O	[M-H]	134.2	Organic acids and derivatives	20190304JAP_CCSdatabase_final.csv
	C(C[C@@H](C(=O)O)N)[C@H](CN)O	[M+H]	135	Organic acids and derivatives	20190304JAP_CCSdatabase_final.csv
439283	C(C[C@@H](C(=O)O)N)C[C@@H](C(=O)O)N	[M-H]	138.2	Organic acids and derivatives	20190304JAP_CCSdatabase_final.csv
439283	C(C[C@@H](C(=O)O)N)C[C@@H](C(=O)O)N	[M+H]	141.4	Organic acids and derivatives	20190304JAP_CCSdatabase_final.csv
92136	C(C[C@@H](C(=O)O)N)CC(=O)O	[M-H]	130.8	Organic acids and derivatives	20190304JAP_CCSdatabase_final.csv
92136	C(C[C@@H](C(=O)O)N)CC(=O)O	[M+H]	135	Organic acids and derivatives	20190304JAP_CCSdatabase_final.csv
6322	C(C[C@@H](C(=O)O)N)CN=C(N)N	[M-H]	137.2	Organic acids and derivatives	20190304JAP_CCSdatabase_final.csv
6322	C(C[C@@H](C(=O)O)N)CN=C(N)N	[M-H]	137.6	Organic acids and derivatives	20190304JAP_CCSdatabase_final.csv
6322	C(C[C@@H](C(=O)O)N)CN=C(N)N	[M+H]	136.3	Organic acids and derivatives	20190304JAP_CCSdatabase_final.csv
6322	C(C[C@@H](C(=O)O)N)CN=C(N)N	[M+H]	136.6	Organic acids and derivatives	20190304JAP_CCSdatabase_final.csv
9750	C(C[C@@H](C(=O)O)N)CNC(=O)N	[M-H]	135.5	Organic acids and derivatives	20190304JAP_CCSdatabase_final.csv
9750	C(C[C@@H](C(=O)O)N)CNC(=O)N	[M+H]	137.7	Organic acids and derivatives	20190304JAP_CCSdatabase_final.csv
	C(C[C@H](C(=O)O)N)CN.Cl	[M-H]	128.7	Organic acids and derivatives	20190304JAP_CCSdatabase_final.csv
	C(C[C@H](C(=O)O)N)CN.Cl	[M+H]	127.9	Organic acids and derivatives	20190304JAP_CCSdatabase_final.csv
115119	C(C[Se][Se]CCN)N	[M+H]	135.9	Organic acids and derivatives	20190304JAP_CCSdatabase_final.csv
70640512	C(C1[C@H]([C@@H](C([C@@H](O1)OC(CO)CO)O)O)O)O	[M-H]	156.7	Organic oxygen compounds	20190304JAP_CCSdatabase_final.csv
16219431	C(C1C(C(C(C(O1)O)O)O)O)OP(=O)(O)O.[K]	[M-H]	146.7	Organic oxygen compounds	20190304JAP_CCSdatabase_final.csv
75612980	C(C1C(C(C(C(O1)OC2C(C(C(C(O2)COP(=O)([O-])[O-])O)O)O)O)O)O)O.[K+].[K+]	[M-H]	180.9	Organic oxygen compounds	20190304JAP_CCSdatabase_final.csv
31040	C(CC(=O)[O-])C(=O)C(=O)[O-].[Na+].[Na+]	[M-H]	121.1	Organic acids and derivatives	20190304JAP_CCSdatabase_final.csv
71	C(CC(=O)C(=O)O)CC(=O)O	[M-H]	126.8	Organic acids and derivatives	20190304JAP_CCSdatabase_final.csv
5961	C(CC(=O)N)[C@@H](C(=O)O)N	[M-H]	127.7	Organic acids and derivatives	20190304JAP_CCSdatabase_final.csv
5961	C(CC(=O)N)[C@@H](C(=O)O)N	[M+H]	130.9	Organic acids and derivatives	20190304JAP_CCSdatabase_final.csv
124886	C(CC(=O)N[C@@H](CS)C(=O)NCC(=O)O)[C@@H](C(=O)O)N	[M-H]	162.8	Organic acids and derivatives	20190304JAP_CCSdatabase_final.csv
124886	C(CC(=O)N[C@@H](CS)C(=O)NCC(=O)O)[C@@H](C(=O)O)N	[M+H]	167.9	Organic acids and derivatives	20190304JAP_CCSdatabase_final.csv
33032	C(CC(=O)O)[C@@H](C(=O)O)N	[M-H]	125.1	Organic acids and derivatives	20190304JAP_CCSdatabase_final.csv
33032	C(CC(=O)O)[C@@H](C(=O)O)N	[M-H]	125.2	Organic acids and derivatives	20190304JAP_CCSdatabase_final.csv
33032	C(CC(=O)O)[C@@H](C(=O)O)N	[M+H]	130.9	Organic acids and derivatives	20190304JAP_CCSdatabase_final.csv
51	C(CC(=O)O)C(=O)C(=O)O	[M-H]	125.2	Organic acids and derivatives	20190304JAP_CCSdatabase_final.csv
137	C(CC(=O)O)C(=O)CN	[M+H]	130.7	Organic acids and derivatives	20190304JAP_CCSdatabase_final.csv
1110	C(CC(=O)O)C(=O)O	[M-H]	119.1	Organic acids and derivatives	20190304JAP_CCSdatabase_final.csv
1110	C(CC(=O)O)C(=O)O	[M+H]	121.9	Organic acids and derivatives	20190304JAP_CCSdatabase_final.csv
743	C(CC(=O)O)CC(=O)O	[M-H]	121.7	Organic acids and derivatives	20190304JAP_CCSdatabase_final.csv
	C(CC(=O)O)CN=C(N)N	[M+H]	129.9	Organic acids and derivatives	20190304JAP_CCSdatabase_final.csv
389	C(CC(C(=O)O)N)CN	[M-H]	136.3	Organic acids and derivatives	20190304JAP_CCSdatabase_final.csv
389	C(CC(C(=O)O)N)CN	[M+H]	128.1	Organic acids and derivatives	20190304JAP_CCSdatabase_final.csv
200164	C(CCC(=O)[O-])CC(=O)[O-]	[M-H]	127.5	Organic acids and derivatives	20190304JAP_CCSdatabase_final.csv
385	C(CCC(=O)O)CCC(=O)O	[M-H]	131.2	Lipids and lipid-like molecules	20190304JAP_CCSdatabase_final.csv
564	C(CCC(=O)O)CCN	[M+H]	130.2	Organic acids and derivatives	20190304JAP_CCSdatabase_final.csv
10457	C(CCCC(=O)O)CCC(=O)O	[M-H]	136	Lipids and lipid-like molecules	20190304JAP_CCSdatabase_final.csv
2266	C(CCCC(=O)O)CCCC(=O)O	[M-H]	140.1	Lipids and lipid-like molecules	20190304JAP_CCSdatabase_final.csv
5192	C(CCCCC(=O)O)CCCC(=O)O	[M-H]	144.2	Lipids and lipid-like molecules	20190304JAP_CCSdatabase_final.csv
74300	C(CCCCC(=O)O)CCCCO	[M-H]	144.5	Lipids and lipid-like molecules	20190304JAP_CCSdatabase_final.csv
79034	C(CCCCCC(=O)O)CCCCCO	[M-H]	152.7	Lipids and lipid-like molecules	20190304JAP_CCSdatabase_final.csv
5962	C(CCN)C[C@@H](C(=O)O)N	[M-H]	135.9	Organic acids and derivatives	20190304JAP_CCSdatabase_final.csv
5962	C(CCN)C[C@@H](C(=O)O)N	[M+H]	131.1	Organic acids and derivatives	20190304JAP_CCSdatabase_final.csv
5962	C(CCN)C[C@@H](C(=O)O)N	[M+H]	131.5	Organic acids and derivatives	20190304JAP_CCSdatabase_final.csv
199	C(CCN=C(N)N)CN	[M+H]	128.5	Organic acids and derivatives	20190304JAP_CCSdatabase_final.csv
1102	C(CCNCCCN)CN	[M+H]	131.3	Organic acids and derivatives	20190304JAP_CCSdatabase_final.csv
1103	C(CCNCCCN)CNCCCN	[M+H]	148.6	Organic acids and derivatives	20190304JAP_CCSdatabase_final.csv
5942	C(CN)CNCCCN	[M+H]	127.6	Organic acids and derivatives	20190304JAP_CCSdatabase_final.csv
12647	C(CO)[C@@H](C(=O)O)N	[M-H]	120.8	Organic acids and derivatives	20190304JAP_CCSdatabase_final.csv
12647	C(CO)[C@@H](C(=O)O)N	[M+H]	126.1	Organic acids and derivatives	20190304JAP_CCSdatabase_final.csv
8113	C(CO)NCCO	[M+H]	122.2	Organic acids and derivatives	20190304JAP_CCSdatabase_final.csv
439406	C(COC(=O)CCC(=O)O)[C@@H](C(=O)O)N	[M+H]	146.2	Organic acids and derivatives	20190304JAP_CCSdatabase_final.csv
1015	C(COP(=O)(O)O)N	[M-H]	123.4	Organic acids and derivatives	20190304JAP_CCSdatabase_final.csv
339	C(CP(=O)(O)O)N	[M-H]	120.3	Organic acids and derivatives	20190304JAP_CCSdatabase_final.csv
339	C(CP(=O)(O)O)N	[M+H]	130.1	Organic acids and derivatives	20190304JAP_CCSdatabase_final.csv
2734570	C(CP(CCC(=O)O)CCC(=O)O)C(=O)O.Cl	[M-H]	149.1	Organic acids and derivatives	20190304JAP_CCSdatabase_final.csv
1123	C(CS(=O)(=O)O)N	[M-H]	118.5	Organic acids and derivatives	20190304JAP_CCSdatabase_final.csv
1123	C(CS(=O)(=O)O)N	[M+H]	127.9	Organic acids and derivatives	20190304JAP_CCSdatabase_final.csv
1123	C(CS(=O)(=O)O)N	[M+H]	134.3	Organic acids and derivatives	20190304JAP_CCSdatabase_final.csv
107812	C(CS(=O)O)N	[M-H]	132.9	Organic acids and derivatives	20190304JAP_CCSdatabase_final.csv
107812	C(CS(=O)O)N	[M+H]	125.5	Organic acids and derivatives	20190304JAP_CCSdatabase_final.csv
778	C(CS)C(C(=O)O)N	[M-H]	143.8	Organic acids and derivatives	20190304JAP_CCSdatabase_final.csv
778	C(CS)C(C(=O)O)N	[M+H]	130.2	Organic acids and derivatives	20190304JAP_CCSdatabase_final.csv
439258	C(CSC[C@@H](C(=O)O)N)[C@@H](C(=O)O)N	[M-H]	142.1	Organic acids and derivatives	20190304JAP_CCSdatabase_final.csv
439258	C(CSC[C@@H](C(=O)O)N)[C@@H](C(=O)O)N	[M+H]	147.4	Organic acids and derivatives	20190304JAP_CCSdatabase_final.csv
834	C(CSCC(C(=O)O)N)C(C(=O)O)N	[M-H]	143.9	Organic acids and derivatives	20190304JAP_CCSdatabase_final.csv
10010	C(CSSCCC(C(=O)O)N)C(C(=O)O)N	[M-H]	151.7	Organic acids and derivatives	20190304JAP_CCSdatabase_final.csv
10010	C(CSSCCC(C(=O)O)N)C(C(=O)O)N	[M+H]	157.7	Organic acids and derivatives	20190304JAP_CCSdatabase_final.csv
643798	C/C(=C/C(=O)O)/C(=O)O	[M-H]	118.6	Organic acids and derivatives	20190304JAP_CCSdatabase_final.csv
6441567	C/C=C(\C)/C(=O)NCC(=O)O	[M-H]	142.4	Organic acids and derivatives	20190304JAP_CCSdatabase_final.csv
439230	C[C@@](CCO)(CC(=O)O)O	[M-H]	129	Organic acids and derivatives	20190304JAP_CCSdatabase_final.csv
51580080	C[C@@]1([C@H]2C[C@H]3[C@@H](C(=O)C(=C([C@]3(C(=O)C2=C(C4=C1C=CC=C4O)O)O)[O-])C(=O)N)[NH+](C)C)O	[M-H]	200.2	Organoheterocyclic compounds	20190304JAP_CCSdatabase_final.csv
99289	C[C@@H]([C@@H](C(=O)O)N)O	[M-H]	119.7	Organic acids and derivatives	20190304JAP_CCSdatabase_final.csv
119055	C[C@@H]([C@@H](C1=NC2=C(NC1)NC(=NC2=O)N)O)O	[M-H]	150.9	Organoheterocyclic compounds	20190304JAP_CCSdatabase_final.csv
119055	C[C@@H]([C@@H](C1=NC2=C(NC1)NC(=NC2=O)N)O)O	[M+H]	154.2	Organoheterocyclic compounds	20190304JAP_CCSdatabase_final.csv
156391	C[C@@H](C1=CC2=C(C=C1)C=C(C=C2)OC)C(=O)O	[M+H]	153.9	Benzenoids	20190304JAP_CCSdatabase_final.csv
439182	C[C@@H]1[C@H]([C@H]([C@@H](O1)N2C=NC3=C(N=CN=C32)N)O)O	[M-H]	154.9	Organoheterocyclic compounds	20190304JAP_CCSdatabase_final.csv
439182	C[C@@H]1[C@H]([C@H]([C@@H](O1)N2C=NC3=C(N=CN=C32)N)O)O	[M+H]	152.3	Organoheterocyclic compounds	20190304JAP_CCSdatabase_final.csv
439182	C[C@@H]1[C@H]([C@H]([C@@H](O1)N2C=NC3=C(N=CN=C32)N)O)O	[M+H]	159.6	Organoheterocyclic compounds	20190304JAP_CCSdatabase_final.csv
261491	C[C@@H]1[C@H]2C[C@]2(CC1=O)C(C)C	[M+H]	140.9	Lipids and lipid-like molecules	20190304JAP_CCSdatabase_final.csv
60464	C[C@@H]1CN(C[C@@H](N1)C)C2=C(C(=C3C(=C2F)N(C=C(C3=O)C(=O)O)C4CC4)N)F	[M+H]	190.2	Organoheterocyclic compounds	20190304JAP_CCSdatabase_final.csv
60464	C[C@@H]1CN(C[C@@H](N1)C)C2=C(C(=C3C(=C2F)N(C=C(C3=O)C(=O)O)C4CC4)N)F	[M+H]	214.5	Organoheterocyclic compounds	20190304JAP_CCSdatabase_final.csv
	C[C@](CCOP(=O)(O)OP(=O)(O)O)(CC(=O)O)O	[M-H]	139.5	Organic acids and derivatives	20190304JAP_CCSdatabase_final.csv
246164	C[C@]12CC[C@H](C[C@H]1CC[C@@H]3[C@@H]2[C@H](C[C@]4([C@H]3CC[C@@]4([C@@H](CO)O)O)C)O)O	[M-H]	202	Lipids and lipid-like molecules	20190304JAP_CCSdatabase_final.csv
150891	C[C@]12CC[C@H]3[C@H]([C@@H]1CC[C@@H]2C(=O)CO)CC=C4[C@@]3(CCC(C4)O)C	[M+H]	189.3	Lipids and lipid-like molecules	20190304JAP_CCSdatabase_final.csv
440624	C[C@]12CC[C@H]3[C@H]([C@@H]1CCC2=O)CCC4=CC(=C(C=C34)OC)O	[M-H]	183.9	Lipids and lipid-like molecules	20190304JAP_CCSdatabase_final.csv
440624	C[C@]12CC[C@H]3[C@H]([C@@H]1CCC2=O)CCC4=CC(=C(C=C34)OC)O	[M+H]	173.4	Lipids and lipid-like molecules	20190304JAP_CCSdatabase_final.csv
5754	C[C@]12CCC(=O)C=C1CC[C@@H]3[C@@H]2[C@H](C[C@]4([C@H]3CC[C@@]4(C(=O)CO)O)C)O	[M-H]	192.1	Lipids and lipid-like molecules	20190304JAP_CCSdatabase_final.csv
5754	C[C@]12CCC(=O)C=C1CC[C@@H]3[C@@H]2[C@H](C[C@]4([C@H]3CC[C@@]4(C(=O)CO)O)C)O	[M+H]	188.9	Lipids and lipid-like molecules	20190304JAP_CCSdatabase_final.csv
5753	C[C@]12CCC(=O)C=C1CC[C@@H]3[C@@H]2[C@H](C[C@]4([C@H]3CC[C@@H]4C(=O)CO)C)O	[M-H]	186.8	Lipids and lipid-like molecules	20190304JAP_CCSdatabase_final.csv
5753	C[C@]12CCC(=O)C=C1CC[C@@H]3[C@@H]2[C@H](C[C@]4([C@H]3CC[C@@H]4C(=O)CO)C)O	[M+H]	187	Lipids and lipid-like molecules	20190304JAP_CCSdatabase_final.csv
5839	C[C@]12CCC(=O)C=C1CC[C@@H]3[C@@H]2[C@H](C[C@]4([C@H]3CC[C@@H]4C(=O)CO)C=O)O	[M-H]	187.7	Lipids and lipid-like molecules	20190304JAP_CCSdatabase_final.csv
5839	C[C@]12CCC(=O)C=C1CC[C@@H]3[C@@H]2[C@H](C[C@]4([C@H]3CC[C@@H]4C(=O)CO)C=O)O	[M+H]	194.8	Lipids and lipid-like molecules	20190304JAP_CCSdatabase_final.csv
222786	C[C@]12CCC(=O)C=C1CC[C@@H]3[C@@H]2C(=O)C[C@]4([C@H]3CC[C@@]4(C(=O)CO)O)C	[M-H]	191.4	Lipids and lipid-like molecules	20190304JAP_CCSdatabase_final.csv
222786	C[C@]12CCC(=O)C=C1CC[C@@H]3[C@@H]2C(=O)C[C@]4([C@H]3CC[C@@]4(C(=O)CO)O)C	[M+H]	188.4	Lipids and lipid-like molecules	20190304JAP_CCSdatabase_final.csv
440707	C[C@]12CCC(=O)C=C1CC[C@@H]3[C@@H]2CC[C@]4([C@H]3CC[C@@]4(C(=O)CO)O)C	[M+H]	187.8	Lipids and lipid-like molecules	20190304JAP_CCSdatabase_final.csv
6128	C[C@]12CCC(=O)C=C1CC[C@@H]3[C@@H]2CC[C@]4([C@H]3CCC4=O)C	[M+H]	182.8	Lipids and lipid-like molecules	20190304JAP_CCSdatabase_final.csv
6288	C[C@H]([C@@H](C(=O)O)N)O	[M-H]	129.2	Organic acids and derivatives	20190304JAP_CCSdatabase_final.csv
6288	C[C@H]([C@@H](C(=O)O)N)O	[M+H]	127.3	Organic acids and derivatives	20190304JAP_CCSdatabase_final.csv
91448	C[C@H](CCC(=O)[O-])[C@H]1CC[C@@H]2[C@@]1([C@H](C[C@H]3[C@H]2CC[C@H]4[C@@]3(CC[C@H](C4)O)C)O)C.[Na+]	[M-H]	202.1	Lipids and lipid-like molecules	20190304JAP_CCSdatabase_final.csv
13037677	C[C@H](CCC(=O)NCC(=O)[O-])[C@H]1CC[C@@H]2[C@@]1([C@H](C[C@H]3[C@H]2CC[C@H]4[C@@]3(CC[C@H](C4)O)C)O)C.[Na+]	[M-H]	218.2	Lipids and lipid-like molecules	20190304JAP_CCSdatabase_final.csv
10140	C[C@H](CCC(=O)NCC(=O)O)[C@H]1CC[C@@H]2[C@@]1([C@H](C[C@H]3[C@H]2[C@@H](C[C@H]4[C@@]3(CC[C@H](C4)O)C)O)O)C	[M-H]	202.2	Lipids and lipid-like molecules	20190304JAP_CCSdatabase_final.csv
10140	C[C@H](CCC(=O)NCC(=O)O)[C@H]1CC[C@@H]2[C@@]1([C@H](C[C@H]3[C@H]2[C@@H](C[C@H]4[C@@]3(CC[C@H](C4)O)C)O)O)C	[M+H]	199.7	Lipids and lipid-like molecules	20190304JAP_CCSdatabase_final.csv
24856164	C[C@H](CCC(=O)NCC(=O)O)[C@H]1CC[C@@H]2[C@@]1([C@H](C[C@H]3[C@H]2[C@@H](C[C@H]4[C@@]3(CC[C@H](C4)O)C)O)O)C.O	[M-H]	218.6	Lipids and lipid-like molecules	20190304JAP_CCSdatabase_final.csv
16218626	C[C@H](CCC(=O)NCCS(=O)(=O)[O-])[C@H]1CC[C@@H]2[C@@]1([C@H](C[C@H]3[C@H]2[C@@H](C[C@H]4[C@@]3(CC[C@H](C4)O)C)O)O)C.O.[Na+]	[M-H]	221.2	Lipids and lipid-like molecules	20190304JAP_CCSdatabase_final.csv
16219994	C[C@H](CCC(=O)NCCS(=O)(=O)[O-])[C@H]1CC[C@@H]2[C@@]1([C@H](C[C@H]3[C@H]2CC[C@H]4[C@@]3(CC[C@H](C4)O)C)O)C.O.[Na+]	[M-H]	221	Lipids and lipid-like molecules	20190304JAP_CCSdatabase_final.csv
54608447	C[C@H](CCC(=O)NCCS(=O)(=O)O)[C@H]1CC[C@@H]2[C@@]1(CC[C@H]3[C@H]2[C@@H](C[C@H]4[C@@]3(CC[C@H](C4)O)C)O)C.[Na+]	[M-H]	221	Lipids and lipid-like molecules	20190304JAP_CCSdatabase_final.csv
54608445	C[C@H](CCC(=O)NCCS(=O)(=O)O)[C@H]1CC[C@@H]2[C@@]1(CC[C@H]3[C@H]2CC[C@H]4[C@@]3(CC[C@H](C4)O)C)C.[Na+]	[M-H]	206.5	Lipids and lipid-like molecules	20190304JAP_CCSdatabase_final.csv
221493	C[C@H](CCC(=O)O)[C@H]1CC[C@@H]2[C@@]1([C@H](C[C@H]3[C@H]2[C@@H](C[C@H]4[C@@]3(CC[C@H](C4)O)C)O)O)C	[M-H]	203.1	Lipids and lipid-like molecules	20190304JAP_CCSdatabase_final.csv
122340	C[C@H](CCC(=O)O)[C@H]1CC[C@@H]2[C@@]1([C@H](C[C@H]3[C@H]2[C@H](C[C@H]4[C@@]3(CC[C@H](C4)O)C)O)O)C	[M-H]	203.3	Lipids and lipid-like molecules	20190304JAP_CCSdatabase_final.csv
222528	C[C@H](CCC(=O)O)[C@H]1CC[C@@H]2[C@@]1([C@H](C[C@H]3[C@H]2CC[C@H]4[C@@]3(CC[C@H](C4)O)C)O)C	[M-H]	202.1	Lipids and lipid-like molecules	20190304JAP_CCSdatabase_final.csv
92805	C[C@H](CCC(=O)O)[C@H]1CC[C@@H]2[C@@]1(CC[C@H]3[C@H]2[C@@H]([C@@H]([C@H]4[C@@]3(CC[C@H](C4)O)C)O)O)C	[M-H]	204.2	Lipids and lipid-like molecules	20190304JAP_CCSdatabase_final.csv
5283852	C[C@H](CCC(=O)O)[C@H]1CC[C@@H]2[C@@]1(CC[C@H]3[C@H]2[C@@H]([C@H]([C@H]4[C@@]3(CC[C@H](C4)O)C)O)O)C	[M-H]	205.6	Lipids and lipid-like molecules	20190304JAP_CCSdatabase_final.csv
10133	C[C@H](CCC(=O)O)[C@H]1CC[C@@H]2[C@@]1(CC[C@H]3[C@H]2[C@@H](C[C@H]4[C@@]3(CC[C@H](C4)O)C)O)C	[M-H]	205.9	Lipids and lipid-like molecules	20190304JAP_CCSdatabase_final.csv
5283853	C[C@H](CCC(=O)O)[C@H]1CC[C@@H]2[C@@]1(CC[C@H]3[C@H]2[C@H]([C@H]([C@H]4[C@@]3(CC[C@H](C4)O)C)O)O)C	[M-H]	201.2	Lipids and lipid-like molecules	20190304JAP_CCSdatabase_final.csv
9903	C[C@H](CCC(=O)O)[C@H]1CC[C@@H]2[C@@]1(CC[C@H]3[C@H]2CC[C@H]4[C@@]3(CC[C@H](C4)O)C)C	[M-H]	201.4	Lipids and lipid-like molecules	20190304JAP_CCSdatabase_final.csv
442428	C[C@H]1[C@@H]([C@H]([C@H]([C@@H](O1)O[C@@H]2[C@H]([C@@H]([C@H](O[C@H]2OC3=CC(=C4C(=O)C[C@H](OC4=C3)C5=CC=C(C=C5)O)O)CO)O)O)O)O)O	[M-H]	216.6	Organoheterocyclic compounds	20190304JAP_CCSdatabase_final.csv
442428	C[C@H]1[C@@H]([C@H]([C@H]([C@@H](O1)O[C@@H]2[C@H]([C@@H]([C@H](O[C@H]2OC3=CC(=C4C(=O)C[C@H](OC4=C3)C5=CC=C(C=C5)O)O)CO)O)O)O)O)O	[M+H]	239.1	Organoheterocyclic compounds	20190304JAP_CCSdatabase_final.csv
119258	C[C@H]1[C@@H]([C@H]([C@H]([C@@H](O1)O[C@@H]2[C@H](OC3=CC(=CC(=C3C2=O)O)O)C4=CC(=C(C=C4)O)O)O)O)O	[M-H]	197.7	Organoheterocyclic compounds	20190304JAP_CCSdatabase_final.csv
119258	C[C@H]1[C@@H]([C@H]([C@H]([C@@H](O1)O[C@@H]2[C@H](OC3=CC(=CC(=C3C2=O)O)O)C4=CC(=C(C=C4)O)O)O)O)O	[M+H]	204.6	Organoheterocyclic compounds	20190304JAP_CCSdatabase_final.csv
5280805	C[C@H]1[C@@H]([C@H]([C@H]([C@@H](O1)OC[C@@H]2[C@H]([C@@H]([C@H]([C@@H](O2)OC3=C(OC4=CC(=CC(=C4C3=O)O)O)C5=CC(=C(C=C5)O)O)O)O)O)O)O)O	[M-H]	234.7	Organoheterocyclic compounds	20190304JAP_CCSdatabase_final.csv
5280805	C[C@H]1[C@@H]([C@H]([C@H]([C@@H](O1)OC[C@@H]2[C@H]([C@@H]([C@H]([C@@H](O2)OC3=C(OC4=CC(=CC(=C4C3=O)O)O)C5=CC(=C(C=C5)O)O)O)O)O)O)O)O	[M+H]	234.7	Organoheterocyclic compounds	20190304JAP_CCSdatabase_final.csv
44146693	C[C@H]1CC2=C([C@@H]1NC3=NC(=NC(=N3)N)C(C)F)C=C(C=C2)C	[M-H]	180	Benzenoids	20190304JAP_CCSdatabase_final.csv
44146693	C[C@H]1CC2=C([C@@H]1NC3=NC(=NC(=N3)N)C(C)F)C=C(C=C2)C	[M+H]	168.2	Benzenoids	20190304JAP_CCSdatabase_final.csv
71317118	C[N+](C)(C)C[C@@H](CC(=O)[O-])OC(=O)CCCC(=O)O	[M-H]	165.5	Lipids and lipid-like molecules	20190304JAP_CCSdatabase_final.csv
71317118	C[N+](C)(C)C[C@@H](CC(=O)[O-])OC(=O)CCCC(=O)O	[M+H]	161.1	Lipids and lipid-like molecules	20190304JAP_CCSdatabase_final.csv
247	C[N+](C)(C)CC(=O)[O-]	[M+H]	121.1	Organic acids and derivatives	20190304JAP_CCSdatabase_final.csv
5970	C[N+](C)(C)CC(CC(=O)O)O.[Cl-]	[M+H]	132.9	Organic acids and derivatives	20190304JAP_CCSdatabase_final.csv
134	C[N+](C)(C)CCCC(=O)O	[M+H]	129.6	Organic acids and derivatives	20190304JAP_CCSdatabase_final.csv
22620	C[N+](C)(C)CCCC(=O)O.[Cl-]	[M+H]	129.7	Organic acids and derivatives	20190304JAP_CCSdatabase_final.csv
159660	C[N+](C)(C)CCCCC(C(=O)O)N	[M+H]	141.8	Organic acids and derivatives	20190304JAP_CCSdatabase_final.csv
305	C[N+](C)(C)CCO	[M*]	118.7	Organic acids and derivatives	20190304JAP_CCSdatabase_final.csv
305	C[N+](C)(C)CCO	[M+H]	117.4	Organic acids and derivatives	20190304JAP_CCSdatabase_final.csv
20968	C[N+](C)(C)CCOP(=O)([O-])[O-].[Cl-].[Ca+2]	[M+H]	136.7	Organic acids and derivatives	20190304JAP_CCSdatabase_final.csv
36605	C[N+](C)(C)CCOP(=O)([O-])OP(=O)([O-])OC[C@@H]1[C@H]([C@H]([C@@H](O1)N2C=CC(=NC2=O)N)O)O.[Na+]	[M-H]	205.9	Organic oxygen compounds	20190304JAP_CCSdatabase_final.csv
36605	C[N+](C)(C)CCOP(=O)([O-])OP(=O)([O-])OC[C@@H]1[C@H]([C@H]([C@@H](O1)N2C=CC(=NC2=O)N)O)O.[Na+]	[M+H]	198.5	Organic oxygen compounds	20190304JAP_CCSdatabase_final.csv
13804	C[N+](C)(C)CCOP(=O)([O-])OP(=O)(O)OC[C@@H]1[C@H]([C@H]([C@@H](O1)N2C=CC(=NC2=O)N)O)O	[M-H]	207.7	Organic oxygen compounds	20190304JAP_CCSdatabase_final.csv
13804	C[N+](C)(C)CCOP(=O)([O-])OP(=O)(O)OC[C@@H]1[C@H]([C@H]([C@@H](O1)N2C=CC(=NC2=O)N)O)O	[M+H]	197.6	Organic oxygen compounds	20190304JAP_CCSdatabase_final.csv
1014	C[N+](C)(C)CCOP(=O)(O)O	[M+H]	137.7	Organic acids and derivatives	20190304JAP_CCSdatabase_final.csv
70495	C[N+]1=CC=CC(=C1)C(=O)N.[Cl-]	[M*]	126.1	Organoheterocyclic compounds	20190304JAP_CCSdatabase_final.csv
134606	C[N+]1=CC=CC(=C1)C(=O)O.[Cl-]	[M+H]	124.1	Organoheterocyclic compounds	20190304JAP_CCSdatabase_final.csv
34755	C[S+](CC[C@@H](C(=O)[O-])N)C[C@@H]1[C@H]([C@H]([C@@H](O1)N2C=NC3=C(N=CN=C32)N)O)O	[M+H]	185.6	Organoheterocyclic compounds	20190304JAP_CCSdatabase_final.csv
105024	C[Se]CC[C@@H](C(=O)O)N	[M-H]	150	Organic acids and derivatives	20190304JAP_CCSdatabase_final.csv
105024	C[Se]CC[C@@H](C(=O)O)N	[M+H]	135.4	Organic acids and derivatives	20190304JAP_CCSdatabase_final.csv
77950	C=C(C(=O)O)OP(=O)(O)[O-].[K+]	[M-H]	163.7	Organic acids and derivatives	20190304JAP_CCSdatabase_final.csv
811	C=C(CC(=O)O)C(=O)O	[M-H]	119.1	Organic acids and derivatives	20190304JAP_CCSdatabase_final.csv
15965	C1(=C(C(=NC(=C1Cl)Cl)C(=O)O)Cl)N	[M-H]	136.4	Organoheterocyclic compounds	20190304JAP_CCSdatabase_final.csv
15965	C1(=C(C(=NC(=C1Cl)Cl)C(=O)O)Cl)N	[M+H]	141.9	Organoheterocyclic compounds	20190304JAP_CCSdatabase_final.csv
204	C1(C(=O)NC(=O)N1)NC(=O)N	[M-H]	126.7	Organic acids and derivatives	20190304JAP_CCSdatabase_final.csv
	C1(C(C(C(C(C1O)O)O)O)O)O	[M-H]	131.5	Organic oxygen compounds	20190304JAP_CCSdatabase_final.csv
	C1(C(C(C(C(C1OP(=O)(O)O)OP(=O)(O)O)OP(=O)(O)O)OP(=O)(O)O)OP(=O)(O)O)OP(=O)(O)O	[M-H]	195.5	Organic oxygen compounds	20190304JAP_CCSdatabase_final.csv
	C1(C(C(C(C(C1OP(=O)(O)O)OP(=O)(O)O)OP(=O)(O)O)OP(=O)(O)O)OP(=O)(O)O)OP(=O)(O)O	[M+H]	215.5	Organic oxygen compounds	20190304JAP_CCSdatabase_final.csv
13711	C1[C@@H]([C@H](O[C@H]1N2C=CC(=NC2=O)N)CO)O	[M-H]	149.1	Organic oxygen compounds	20190304JAP_CCSdatabase_final.csv
71315445	C1[C@@H]([C@H](O[C@H]1N2C=CC(=NC2=O)N)COP(=O)([O-])OP(=O)([O-])[O-])O.[Na+].[Na+].[Na+]	[M-H]	174	Organic oxygen compounds	20190304JAP_CCSdatabase_final.csv
71315445	C1[C@@H]([C@H](O[C@H]1N2C=CC(=NC2=O)N)COP(=O)([O-])OP(=O)([O-])[O-])O.[Na+].[Na+].[Na+]	[M+H]	172.1	Organic oxygen compounds	20190304JAP_CCSdatabase_final.csv
13945	C1[C@@H]([C@H](O[C@H]1N2C=CC(=NC2=O)N)COP(=O)(O)O)O	[M-H]	163.7	Organic oxygen compounds	20190304JAP_CCSdatabase_final.csv
13945	C1[C@@H]([C@H](O[C@H]1N2C=CC(=NC2=O)N)COP(=O)(O)O)O	[M+H]	164.5	Organic oxygen compounds	20190304JAP_CCSdatabase_final.csv
13712	C1[C@@H]([C@H](O[C@H]1N2C=CC(=O)NC2=O)CO)O	[M-H]	150	Organic oxygen compounds	20190304JAP_CCSdatabase_final.csv
13957223	C1[C@@H]([C@H](O[C@H]1N2C=CC(=O)NC2=O)COP(=O)([O-])[O-])O.[Na+].[Na+]	[M-H]	159.2	Organic oxygen compounds	20190304JAP_CCSdatabase_final.csv
65070	C1[C@@H]([C@H](O[C@H]1N2C=CC(=O)NC2=O)COP(=O)(O)OP(=O)(O)OP(=O)(O)O)O	[M-H]	178.5	Organic oxygen compounds	20190304JAP_CCSdatabase_final.csv
13730	C1[C@@H]([C@H](O[C@H]1N2C=NC3=C(N=CN=C32)N)CO)O	[M-H]	155.4	Organoheterocyclic compounds	20190304JAP_CCSdatabase_final.csv
13730	C1[C@@H]([C@H](O[C@H]1N2C=NC3=C(N=CN=C32)N)CO)O	[M+H]	152.3	Organoheterocyclic compounds	20190304JAP_CCSdatabase_final.csv
13730	C1[C@@H]([C@H](O[C@H]1N2C=NC3=C(N=CN=C32)N)CO)O	[M+H]	158.2	Organoheterocyclic compounds	20190304JAP_CCSdatabase_final.csv
18601695	C1[C@@H]([C@H](O[C@H]1N2C=NC3=C(N=CN=C32)N)COP(=O)([O-])OP(=O)(O)OP(=O)(O)[O-])O.[Na+].[Na+]	[M-H]	186.4	Organoheterocyclic compounds	20190304JAP_CCSdatabase_final.csv
18601695	C1[C@@H]([C@H](O[C@H]1N2C=NC3=C(N=CN=C32)N)COP(=O)([O-])OP(=O)(O)OP(=O)(O)[O-])O.[Na+].[Na+]	[M+H]	195	Organoheterocyclic compounds	20190304JAP_CCSdatabase_final.csv
12599	C1[C@@H]([C@H](O[C@H]1N2C=NC3=C(N=CN=C32)N)COP(=O)(O)O)O	[M-H]	168.8	Organoheterocyclic compounds	20190304JAP_CCSdatabase_final.csv
12599	C1[C@@H]([C@H](O[C@H]1N2C=NC3=C(N=CN=C32)N)COP(=O)(O)O)O	[M+H]	168.6	Organoheterocyclic compounds	20190304JAP_CCSdatabase_final.csv
	C1[C@@H]([C@H](O[C@H]1N2C=NC3=C2N=C(NC3=O)N)COP(=O)(O)O)O	[M-H]	169.4	Organoheterocyclic compounds	20190304JAP_CCSdatabase_final.csv
	C1[C@@H]([C@H](O[C@H]1N2C=NC3=C2N=C(NC3=O)N)COP(=O)(O)O)O	[M+H]	177.3	Organoheterocyclic compounds	20190304JAP_CCSdatabase_final.csv
187790	C1[C@@H]([C@H](O[C@H]1N2C=NC3=C2NC(=NC3=O)N)CO)O	[M-H]	159.2	Organoheterocyclic compounds	20190304JAP_CCSdatabase_final.csv
25245673	C1[C@@H]([C@H](O[C@H]1N2C=NC3=C2NC(=NC3=O)N)COP(=O)([O-])OP(=O)([O-])[O-])O	[M-H]	180.8	Organoheterocyclic compounds	20190304JAP_CCSdatabase_final.csv
25245673	C1[C@@H]([C@H](O[C@H]1N2C=NC3=C2NC(=NC3=O)N)COP(=O)([O-])OP(=O)([O-])[O-])O	[M+H]	188.5	Organoheterocyclic compounds	20190304JAP_CCSdatabase_final.csv
65103	C1[C@@H]([C@H](O[C@H]1N2C=NC3=C2NC(=NC3=O)N)COP(=O)(O)OP(=O)(O)OP(=O)(O)O)O	[M-H]	191.9	Organoheterocyclic compounds	20190304JAP_CCSdatabase_final.csv
9064	C1[C@@H]([C@H](OC2=CC(=CC(=C21)O)O)C3=CC(=C(C=C3)O)O)O	[M-H]	159.4	Organoheterocyclic compounds	20190304JAP_CCSdatabase_final.csv
9064	C1[C@@H]([C@H](OC2=CC(=CC(=C21)O)O)C3=CC(=C(C=C3)O)O)O	[M+H]	164.1	Organoheterocyclic compounds	20190304JAP_CCSdatabase_final.csv
216877	C1[C@@H]2[C@H]([C@H]([C@@H](O2)N3C=NC4=C(N=CN=C43)N)O)OP(=O)(O1)[O-].[Na+]	[M-H]	171.9	Organic oxygen compounds	20190304JAP_CCSdatabase_final.csv
216877	C1[C@@H]2[C@H]([C@H]([C@@H](O2)N3C=NC4=C(N=CN=C43)N)O)OP(=O)(O1)[O-].[Na+]	[M+H]	172.6	Organic oxygen compounds	20190304JAP_CCSdatabase_final.csv
216877	C1[C@@H]2[C@H]([C@H]([C@@H](O2)N3C=NC4=C(N=CN=C43)N)O)OP(=O)(O1)[O-].[Na+]	[M+H]	177	Organic oxygen compounds	20190304JAP_CCSdatabase_final.csv
6076	C1[C@@H]2[C@H]([C@H]([C@@H](O2)N3C=NC4=C(N=CN=C43)N)O)OP(=O)(O1)O	[M-H]	171.9	Organic oxygen compounds	20190304JAP_CCSdatabase_final.csv
6076	C1[C@@H]2[C@H]([C@H]([C@@H](O2)N3C=NC4=C(N=CN=C43)N)O)OP(=O)(O1)O	[M+H]	172.7	Organic oxygen compounds	20190304JAP_CCSdatabase_final.csv
6076	C1[C@@H]2[C@H]([C@H]([C@@H](O2)N3C=NC4=C(N=CN=C43)N)O)OP(=O)(O1)O	[M+H]	177	Organic oxygen compounds	20190304JAP_CCSdatabase_final.csv
16219426	C1[C@@H]2[C@H]([C@H]([C@@H](O2)N3C=NC4=C3NC(=NC4=O)N)O)OP(=O)(O1)[O-].[Na+]	[M-H]	167.8	Organoheterocyclic compounds	20190304JAP_CCSdatabase_final.csv
16219426	C1[C@@H]2[C@H]([C@H]([C@@H](O2)N3C=NC4=C3NC(=NC4=O)N)O)OP(=O)(O1)[O-].[Na+]	[M+H]	172.4	Organoheterocyclic compounds	20190304JAP_CCSdatabase_final.csv
8742	C1[C@H]([C@@H]([C@@H](C=C1C(=O)O)O)O)O	[M-H]	137.7	Organic oxygen compounds	20190304JAP_CCSdatabase_final.csv
8742	C1[C@H]([C@@H]([C@@H](C=C1C(=O)O)O)O)O	[M+H]	148.6	Organic oxygen compounds	20190304JAP_CCSdatabase_final.csv
439538	C1[C@H]([C@@H]([C@H]([C@@H](O1)O[C@@H]2COC([C@@H]([C@H]2O)O)O)O)O)O	[M-H]	166.4	Organic oxygen compounds	20190304JAP_CCSdatabase_final.csv
439774	C1[C@H]([C@@H](C(=O)C=C1C(=O)O)O)O	[M-H]	132.2	Organic oxygen compounds	20190304JAP_CCSdatabase_final.csv
439774	C1[C@H]([C@@H](C(=O)C=C1C(=O)O)O)O	[M+H]	131.9	Organic oxygen compounds	20190304JAP_CCSdatabase_final.csv
	C1[C@H](C([C@@H](CC1(C(=O)O)O)O)O)O	[M-H]	134.8	Organic oxygen compounds	20190304JAP_CCSdatabase_final.csv
	C1[C@H](C([C@@H](CC1(C(=O)O)O)O)O)O	[M+H]	145	Organic oxygen compounds	20190304JAP_CCSdatabase_final.csv
5810	C1[C@H](CN[C@@H]1C(=O)O)O	[M-H]	126.7	Organic acids and derivatives	20190304JAP_CCSdatabase_final.csv
5810	C1[C@H](CN[C@@H]1C(=O)O)O	[M+H]	127.9	Organic acids and derivatives	20190304JAP_CCSdatabase_final.csv
440014	C1[C@H](CN[C@H]1C(=O)O)O	[M-H]	124.6	Organic acids and derivatives	20190304JAP_CCSdatabase_final.csv
440014	C1[C@H](CN[C@H]1C(=O)O)O	[M+H]	128.4	Organic acids and derivatives	20190304JAP_CCSdatabase_final.csv
439216	C1[C@H](NC(=O)NC1=O)C(=O)O	[M-H]	125.5	Organic acids and derivatives	20190304JAP_CCSdatabase_final.csv
440735	C1[C@H](OC2=CC(=CC(=C2C1=O)O)O)C3=CC(=C(C=C3)O)O	[M+H]	169.4	Organoheterocyclic compounds	20190304JAP_CCSdatabase_final.csv
439246	C1[C@H](OC2=CC(=CC(=C2C1=O)O)O)C3=CC=C(C=C3)O	[M-H]	166.8	Organoheterocyclic compounds	20190304JAP_CCSdatabase_final.csv
439246	C1[C@H](OC2=CC(=CC(=C2C1=O)O)O)C3=CC=C(C=C3)O	[M+H]	166.9	Organoheterocyclic compounds	20190304JAP_CCSdatabase_final.csv
171548	C1[C@H]2[C@@H]([C@@H](S1)CCCCC(=O)O)NC(=O)N2	[M-H]	157.1	Organic oxygen compounds	20190304JAP_CCSdatabase_final.csv
171548	C1[C@H]2[C@@H]([C@@H](S1)CCCCC(=O)O)NC(=O)N2	[M+H]	151.4	Organic oxygen compounds	20190304JAP_CCSdatabase_final.csv
	C1=C(C(=C(C(=C1Cl)O)Cl)Cl)C2=CC(=C(C(=C2Cl)Cl)Cl)Cl	[M-H]	179.8	Benzenoids	20190304JAP_CCSdatabase_final.csv
160157	C1=C(C(=CC(=C1O)O)O)CCN.Cl	[M+H]	143.2	Benzenoids	20190304JAP_CCSdatabase_final.csv
15047	C1=C(C(=O)NC(=O)N1)[C@H]2[C@@H]([C@@H]([C@H](O2)CO)O)O	[M-H]	150.3	Organoheterocyclic compounds	20190304JAP_CCSdatabase_final.csv
90301	C1=C(C(=O)NC(=O)N1)C(=O)O	[M-H]	119.3	Organoheterocyclic compounds	20190304JAP_CCSdatabase_final.csv
78168	C1=C(C(=O)NC(=O)N1)CO	[M-H]	124.1	Organoheterocyclic compounds	20190304JAP_CCSdatabase_final.csv
67532	C1=C(C=C(C(=C1Br)O)Br)C[C@@H](C(=O)O)N	[M-H]	155.1	Organic acids and derivatives	20190304JAP_CCSdatabase_final.csv
67532	C1=C(C=C(C(=C1Br)O)Br)C[C@@H](C(=O)O)N	[M+H]	167.5	Organic acids and derivatives	20190304JAP_CCSdatabase_final.csv
178005	C1=C(C=C(C(=C1Cl)O)Cl)C2=CC(=C(C(=C2Cl)Cl)Cl)Cl	[M-H]	174.7	Benzenoids	20190304JAP_CCSdatabase_final.csv
6181	C1=C(C=C(C(=C1I)O)I)CC(C(=O)O)N	[M-H]	159.4	Organic acids and derivatives	20190304JAP_CCSdatabase_final.csv
6181	C1=C(C=C(C(=C1I)O)I)CC(C(=O)O)N	[M+H]	171.4	Organic acids and derivatives	20190304JAP_CCSdatabase_final.csv
5819	C1=C(C=C(C(=C1I)OC2=CC(=C(C(=C2)I)O)I)I)C[C@@H](C(=O)O)N	[M-H]	208	Organic acids and derivatives	20190304JAP_CCSdatabase_final.csv
5819	C1=C(C=C(C(=C1I)OC2=CC(=C(C(=C2)I)O)I)I)C[C@@H](C(=O)O)N	[M+H]	216.6	Organic acids and derivatives	20190304JAP_CCSdatabase_final.csv
128853	C1=C(C=C(C(=C1O)O)O)C2=[O+]C3=CC(=CC(=C3C=C2O)O)O	[M*]	170.3	Benzenoids	20190304JAP_CCSdatabase_final.csv
5281672	C1=C(C=C(C(=C1O)O)O)C2=C(C(=O)C3=C(C=C(C=C3O2)O)O)O	[M+H]	192.7	Benzenoids	20190304JAP_CCSdatabase_final.csv
597	C1=C(NC(=O)N=C1)N	[M+H]	117.4	Organoheterocyclic compounds	20190304JAP_CCSdatabase_final.csv
597	C1=C(NC(=O)N=C1)N	[M+H]	122.6	Organoheterocyclic compounds	20190304JAP_CCSdatabase_final.csv
967	C1=C(NC(=O)NC1=O)C(=O)O	[M-H]	121.7	Organoheterocyclic compounds	20190304JAP_CCSdatabase_final.csv
967	C1=C(NC(=O)NC1=O)C(=O)O	[M+H]	138	Organoheterocyclic compounds	20190304JAP_CCSdatabase_final.csv
736715	C1=C(NC=N1)/C=C/C(=O)O	[M-H]	121.3	Organoheterocyclic compounds	20190304JAP_CCSdatabase_final.csv
736715	C1=C(NC=N1)/C=C/C(=O)O	[M+H]	134.8	Organoheterocyclic compounds	20190304JAP_CCSdatabase_final.csv
6274	C1=C(NC=N1)C[C@@H](C(=O)O)N	[M-H]	128.9	Organic acids and derivatives	20190304JAP_CCSdatabase_final.csv
6274	C1=C(NC=N1)C[C@@H](C(=O)O)N	[M-H]	129.4	Organic acids and derivatives	20190304JAP_CCSdatabase_final.csv
6274	C1=C(NC=N1)C[C@@H](C(=O)O)N	[M+H]	131.9	Organic acids and derivatives	20190304JAP_CCSdatabase_final.csv
6274	C1=C(NC=N1)C[C@@H](C(=O)O)N	[M+H]	132.3	Organic acids and derivatives	20190304JAP_CCSdatabase_final.csv
165377	C1=C(NC=N1)C[C@@H](C(=O)O)N.O.Cl	[M-H]	128.6	Organic acids and derivatives	20190304JAP_CCSdatabase_final.csv
165377	C1=C(NC=N1)C[C@@H](C(=O)O)N.O.Cl	[M+H]	132	Organic acids and derivatives	20190304JAP_CCSdatabase_final.csv
439224	C1=C(NC=N1)C[C@@H](C(=O)O)NC(=O)CCN	[M-H]	153.1	Organic acids and derivatives	20190304JAP_CCSdatabase_final.csv
439224	C1=C(NC=N1)C[C@@H](C(=O)O)NC(=O)CCN	[M+H]	150.8	Organic acids and derivatives	20190304JAP_CCSdatabase_final.csv
197743	C1=C(NC=N1)C[C@@H](CO)N.Cl.Cl	[M-H]	127.9	Organic acids and derivatives	20190304JAP_CCSdatabase_final.csv
197743	C1=C(NC=N1)C[C@@H](CO)N.Cl.Cl	[M+H]	128.8	Organic acids and derivatives	20190304JAP_CCSdatabase_final.csv
145685	C1=C(NC=N1)CC(=O)O.Cl	[M+H]	124	Organic acids and derivatives	20190304JAP_CCSdatabase_final.csv
774	C1=C(NC=N1)CCN	[M+H]	120.4	Organic acids and derivatives	20190304JAP_CCSdatabase_final.csv
5281647	C1=C2C(=CC(=C1O)O)OC3=C(C2=O)C(=C(C(=C3)O)[C@H]4[C@@H]([C@H]([C@@H]([C@H](O4)CO)O)O)O)O	[M-H]	195.1	Organoheterocyclic compounds	20190304JAP_CCSdatabase_final.csv
5281647	C1=C2C(=CC(=C1O)O)OC3=C(C2=O)C(=C(C(=C3)O)[C@H]4[C@@H]([C@H]([C@@H]([C@H](O4)CO)O)O)O)O	[M+H]	195.4	Organoheterocyclic compounds	20190304JAP_CCSdatabase_final.csv
1044	C1=C2C(=NC=N1)N=CN2	[M-H]	114.6	Organoheterocyclic compounds	20190304JAP_CCSdatabase_final.csv
1044	C1=C2C(=NC=N1)N=CN2	[M+H]	121.7	Organoheterocyclic compounds	20190304JAP_CCSdatabase_final.csv
86	C1=CC(=C(C(=C1)O)N)C(=O)O	[M-H]	128.4	Benzenoids	20190304JAP_CCSdatabase_final.csv
86	C1=CC(=C(C(=C1)O)N)C(=O)O	[M+H]	131.3	Benzenoids	20190304JAP_CCSdatabase_final.csv
19	C1=CC(=C(C(=C1)O)O)C(=O)O	[M-H]	120.9	Benzenoids	20190304JAP_CCSdatabase_final.csv
178004	C1=CC(=C(C(=C1C2=CC(=C(C(=C2Cl)Cl)O)Cl)Cl)Cl)Cl	[M-H]	175.1	Benzenoids	20190304JAP_CCSdatabase_final.csv
689043	C1=CC(=C(C=C1/C=C/C(=O)O)O)O	[M-H]	133.2	Benzenoids	20190304JAP_CCSdatabase_final.csv
439260	C1=CC(=C(C=C1[C@H](CN)O)O)O	[M-H]	134.4	Benzenoids	20190304JAP_CCSdatabase_final.csv
	C1=CC(=C(C=C1Br)Br)OC2=C(C(=C(C=C2Br)Br)Br)O	[M-H]	182.6	Benzenoids	20190304JAP_CCSdatabase_final.csv
3086109	C1=CC(=C(C=C1Br)Br)OC2=C(C=C(C=C2Br)Br)O	[M-H]	174.9	Benzenoids	20190304JAP_CCSdatabase_final.csv
65083	C1=CC(=C(C=C1C(=O)O)N)O	[M-H]	126.1	Benzenoids	20190304JAP_CCSdatabase_final.csv
65083	C1=CC(=C(C=C1C(=O)O)N)O	[M+H]	140	Benzenoids	20190304JAP_CCSdatabase_final.csv
72	C1=CC(=C(C=C1C(=O)O)O)O	[M-H]	122.9	Benzenoids	20190304JAP_CCSdatabase_final.csv
85782	C1=CC(=C(C=C1C(C(=O)O)O)O)O	[M-H]	137.7	Benzenoids	20190304JAP_CCSdatabase_final.csv
6047	C1=CC(=C(C=C1C[C@@H](C(=O)O)N)O)O	[M-H]	142.2	Organic acids and derivatives	20190304JAP_CCSdatabase_final.csv
6047	C1=CC(=C(C=C1C[C@@H](C(=O)O)N)O)O	[M+H]	151	Organic acids and derivatives	20190304JAP_CCSdatabase_final.csv
5281792	C1=CC(=C(C=C1C[C@H](C(=O)O)OC(=O)/C=C/C2=CC(=C(C=C2)O)O)O)O	[M-H]	172.6	Benzenoids	20190304JAP_CCSdatabase_final.csv
128861	C1=CC(=C(C=C1C2=[O+]C3=CC(=CC(=C3C=C2O)O)O)O)O	[M*]	167.1	Benzenoids	20190304JAP_CCSdatabase_final.csv
644180	C1=CC(=C(C=C1C2=CC(=C(C(=C2Cl)Cl)Cl)Cl)Cl)O	[M-H]	169.4	Benzenoids	20190304JAP_CCSdatabase_final.csv
681	C1=CC(=C(C=C1CCN)O)O	[M-H]	133.3	Benzenoids	20190304JAP_CCSdatabase_final.csv
681	C1=CC(=C(C=C1CCN)O)O	[M+H]	134.9	Benzenoids	20190304JAP_CCSdatabase_final.csv
119518	C1=CC(=C(C=C1Cl)C2=CC(=C(C(=C2Cl)Cl)Cl)Cl)O	[M-H]	166.3	Benzenoids	20190304JAP_CCSdatabase_final.csv
3469	C1=CC(=C(C=C1O)C(=O)O)O	[M-H]	125	Benzenoids	20190304JAP_CCSdatabase_final.csv
780	C1=CC(=C(C=C1O)CC(=O)O)O	[M-H]	132.7	Benzenoids	20190304JAP_CCSdatabase_final.csv
153963	C1=CC(=C(C=C1O)Cl)C2=C(C=C(C=C2Cl)Cl)Cl	[M-H]	162.7	Benzenoids	20190304JAP_CCSdatabase_final.csv
119106	C1=CC(=C(C=C1O)Cl)C2=C(C=CC(=C2)Cl)Cl	[M-H]	158.4	Benzenoids	20190304JAP_CCSdatabase_final.csv
16218759	C1=CC(=C(C=C1OC2=C(C=C(C=C2I)C[C@@H](C(=O)[O-])N)I)I)O.O.[Na+]	[M+H]	209.3	Organic acids and derivatives	20190304JAP_CCSdatabase_final.csv
1066	C1=CC(=C(N=C1)C(=O)O)C(=O)O	[M-H]	128	Organoheterocyclic compounds	20190304JAP_CCSdatabase_final.csv
1066	C1=CC(=C(N=C1)C(=O)O)C(=O)O	[M+H]	134.9	Organoheterocyclic compounds	20190304JAP_CCSdatabase_final.csv
14180	C1=CC(=C[N+](=C1)[C@H]2[C@@H]([C@@H]([C@H](O2)COP(=O)(O)[O-])O)O)C(=O)N	[M+H]	165.8	Organoheterocyclic compounds	20190304JAP_CCSdatabase_final.csv
5893	C1=CC(=C[N+](=C1)[C@H]2[C@@H]([C@@H]([C@H](O2)COP(=O)(O)OP(=O)(O)OC[C@@H]3[C@H]([C@H]([C@@H](O3)N4C=NC5=C(N=CN=C54)N)O)O)O)O)C(=O)N	[M-H]	225.2	Organoheterocyclic compounds	20190304JAP_CCSdatabase_final.csv
5893	C1=CC(=C[N+](=C1)[C@H]2[C@@H]([C@@H]([C@H](O2)COP(=O)(O)OP(=O)(O)OC[C@@H]3[C@H]([C@H]([C@@H](O3)N4C=NC5=C(N=CN=C54)N)O)O)O)O)C(=O)N	[M+H]	227.7	Organoheterocyclic compounds	20190304JAP_CCSdatabase_final.csv
123953	C1=CC(=C[N+](=C1)[C@H]2[C@@H]([C@@H]([C@H](O2)COP(=O)(O)OP(=O)(O)OC[C@@H]3[C@H]([C@H]([C@@H](O3)N4C=NC5=C(N=CN=C54)N)OP(=O)(O)O)O)O)O)C(=O)O	[M-H]	230.5	Organoheterocyclic compounds	20190304JAP_CCSdatabase_final.csv
123953	C1=CC(=C[N+](=C1)[C@H]2[C@@H]([C@@H]([C@H](O2)COP(=O)(O)OP(=O)(O)OC[C@@H]3[C@H]([C@H]([C@@H](O3)N4C=NC5=C(N=CN=C54)N)OP(=O)(O)O)O)O)O)C(=O)O	[M+H]	230.8	Organoheterocyclic compounds	20190304JAP_CCSdatabase_final.csv
440334	C1=CC(=C[N+](=C1)[C@H]2[C@@H]([C@@H]([C@H](O2)COP(=O)(O)OP(=O)(O)OC[C@@H]3[C@H]([C@H]([C@@H](O3)N4C=NC5=C4NC=NC5=O)O)O)O)O)C(=O)N	[M+H]	221.4	Organoheterocyclic compounds	20190304JAP_CCSdatabase_final.csv
925	C1=CC(=C[N+](=C1)C2C(C(C(O2)COP(=O)([O-])OP(=O)(O)OCC3C(C(C(O3)N4C=NC5=C(N=CN=C54)N)O)O)O)O)C(=O)N	[M-H]	226.4	Organoheterocyclic compounds	20190304JAP_CCSdatabase_final.csv
925	C1=CC(=C[N+](=C1)C2C(C(C(O2)COP(=O)([O-])OP(=O)(O)OCC3C(C(C(O3)N4C=NC5=C(N=CN=C54)N)O)O)O)O)C(=O)N	[M+H]	240.4	Organoheterocyclic compounds	20190304JAP_CCSdatabase_final.csv
18530242	C1=CC(=C[N+](=C1)C2C(C(C(O2)COP(=O)([O-])OP(=O)(O)OCC3C(C(C(O3)N4C=NC5=C(N=CN=C54)N)OP(=O)(O)[O-])O)O)O)C(=O)N.[Na+]	[M-H]	230.7	Organoheterocyclic compounds	20190304JAP_CCSdatabase_final.csv
18530242	C1=CC(=C[N+](=C1)C2C(C(C(O2)COP(=O)([O-])OP(=O)(O)OCC3C(C(C(O3)N4C=NC5=C(N=CN=C54)N)OP(=O)(O)[O-])O)O)O)C(=O)N.[Na+]	[M+H]	232.7	Organoheterocyclic compounds	20190304JAP_CCSdatabase_final.csv
71308718	C1=CC(=C[N+](=C1)C2C(C(C(O2)COP(=O)([O-])OP(=O)(O)OCC3C(C(C(O3)N4C=NC5=C4NC=NC5=O)O)O)O)O)C(=O)N.[Na]	[M-H]	217.7	Organoheterocyclic compounds	20190304JAP_CCSdatabase_final.csv
71308718	C1=CC(=C[N+](=C1)C2C(C(C(O2)COP(=O)([O-])OP(=O)(O)OCC3C(C(C(O3)N4C=NC5=C4NC=NC5=O)O)O)O)O)C(=O)N.[Na]	[M+H]	220.8	Organoheterocyclic compounds	20190304JAP_CCSdatabase_final.csv
86398	C1=CC(=C2C(=C1)OC(O2)(F)F)C3=CNC=C3C#N	[M-H]	147.8	Organoheterocyclic compounds	20190304JAP_CCSdatabase_final.csv
92346	C1=CC(=CC(=C1)O)C2=C(C=CC(=C2)Cl)Cl	[M-H]	154.9	Benzenoids	20190304JAP_CCSdatabase_final.csv
102	C1=CC(=CC(=C1)O)CO	[M-H]	123	Benzenoids	20190304JAP_CCSdatabase_final.csv
638278	C1=CC(=CC=C1/C=C/C(=O)C2=C(C=C(C=C2)O)O)O	[M-H]	163.7	Benzenoids	20190304JAP_CCSdatabase_final.csv
638278	C1=CC(=CC=C1/C=C/C(=O)C2=C(C=C(C=C2)O)O)O	[M+H]	164	Benzenoids	20190304JAP_CCSdatabase_final.csv
637542	C1=CC(=CC=C1/C=C/C(=O)O)O	[M-H]	131.3	Benzenoids	20190304JAP_CCSdatabase_final.csv
6037	C1=CC(=CC=C1C(=O)N[C@@H](CCC(=O)O)C(=O)O)NCC2=CN=C3C(=N2)C(=O)N=C(N3)N	[M-H]	192.1	Organoheterocyclic compounds	20190304JAP_CCSdatabase_final.csv
6037	C1=CC(=CC=C1C(=O)N[C@@H](CCC(=O)O)C(=O)O)NCC2=CN=C3C(=N2)C(=O)N=C(N3)N	[M+H]	195.8	Organoheterocyclic compounds	20190304JAP_CCSdatabase_final.csv
978	C1=CC(=CC=C1C(=O)O)N	[M+H]	127.3	Benzenoids	20190304JAP_CCSdatabase_final.csv
135	C1=CC(=CC=C1C(=O)O)O	[M-H]	121.6	Benzenoids	20190304JAP_CCSdatabase_final.csv
6057	C1=CC(=CC=C1C[C@@H](C(=O)O)N)O	[M-H]	144.5	Organic acids and derivatives	20190304JAP_CCSdatabase_final.csv
6057	C1=CC(=CC=C1C[C@@H](C(=O)O)N)O	[M-H]	145	Organic acids and derivatives	20190304JAP_CCSdatabase_final.csv
6057	C1=CC(=CC=C1C[C@@H](C(=O)O)N)O	[M+H]	145.5	Organic acids and derivatives	20190304JAP_CCSdatabase_final.csv
6057	C1=CC(=CC=C1C[C@@H](C(=O)O)N)O	[M+H]	146	Organic acids and derivatives	20190304JAP_CCSdatabase_final.csv
126	C1=CC(=CC=C1C=O)O	[M-H]	121.6	Benzenoids	20190304JAP_CCSdatabase_final.csv
181087	C1=CC(=CC=C1C2=C(C(=CC(=C2Cl)Cl)Cl)Cl)O	[M-H]	163.4	Benzenoids	20190304JAP_CCSdatabase_final.csv
5280863	C1=CC(=CC=C1C2=C(C(=O)C3=C(C=C(C=C3O2)O)O)O)O	[M-H]	165.4	Benzenoids	20190304JAP_CCSdatabase_final.csv
5280863	C1=CC(=CC=C1C2=C(C(=O)C3=C(C=C(C=C3O2)O)O)O)O	[M+H]	164.9	Benzenoids	20190304JAP_CCSdatabase_final.csv
105036	C1=CC(=CC=C1C2=C(C=C(C=C2Cl)Cl)Cl)O	[M-H]	159.3	Benzenoids	20190304JAP_CCSdatabase_final.csv
91653	C1=CC(=CC=C1C2=C(C=CC(=C2)Cl)Cl)O	[M-H]	152.6	Benzenoids	20190304JAP_CCSdatabase_final.csv
105101	C1=CC(=CC=C1C2=CC(=C(C(=C2Cl)Cl)Cl)Cl)O	[M-H]	163.1	Benzenoids	20190304JAP_CCSdatabase_final.csv
5281600	C1=CC(=CC=C1C2=CC(=O)C3=C(O2)C(=C(C=C3O)O)C4=C(C=CC(=C4)C5=CC(=O)C6=C(C=C(C=C6O5)O)O)O)O	[M-H]	216.5	Benzenoids	20190304JAP_CCSdatabase_final.csv
5281600	C1=CC(=CC=C1C2=CC(=O)C3=C(O2)C(=C(C=C3O)O)C4=C(C=CC(=C4)C5=CC(=O)C6=C(C=C(C=C6O5)O)O)O)O	[M+H]	228.7	Benzenoids	20190304JAP_CCSdatabase_final.csv
91589	C1=CC(=CC=C1C2=CC=C(C=C2)Cl)O	[M-H]	147.8	Benzenoids	20190304JAP_CCSdatabase_final.csv
5281708	C1=CC(=CC=C1C2=COC3=C(C2=O)C=CC(=C3)O)O	[M-H]	161.8	Organoheterocyclic compounds	20190304JAP_CCSdatabase_final.csv
5281708	C1=CC(=CC=C1C2=COC3=C(C2=O)C=CC(=C3)O)O	[M+H]	156.2	Organoheterocyclic compounds	20190304JAP_CCSdatabase_final.csv
5280961	C1=CC(=CC=C1C2=COC3=CC(=CC(=C3C2=O)O)O)O	[M-H]	163.6	Organoheterocyclic compounds	20190304JAP_CCSdatabase_final.csv
5280961	C1=CC(=CC=C1C2=COC3=CC(=CC(=C3C2=O)O)O)O	[M+H]	162.3	Organoheterocyclic compounds	20190304JAP_CCSdatabase_final.csv
979	C1=CC(=CC=C1CC(=O)C(=O)O)O	[M-H]	147.1	Benzenoids	20190304JAP_CCSdatabase_final.csv
127	C1=CC(=CC=C1CC(=O)O)O	[M-H]	128.9	Benzenoids	20190304JAP_CCSdatabase_final.csv
9378	C1=CC(=CC=C1CC(C(=O)O)O)O	[M-H]	142.2	Benzenoids	20190304JAP_CCSdatabase_final.csv
5610	C1=CC(=CC=C1CCN)O	[M+H]	122.6	Benzenoids	20190304JAP_CCSdatabase_final.csv
10393	C1=CC(=CC=C1CCO)O	[M-H]	138.2	Benzenoids	20190304JAP_CCSdatabase_final.csv
5333	C1=CC(=CC=C1N)S(=O)(=O)N	[M-H]	141.2	Benzenoids	20190304JAP_CCSdatabase_final.csv
5333	C1=CC(=CC=C1N)S(=O)(=O)N	[M+H]	155.1	Benzenoids	20190304JAP_CCSdatabase_final.csv
5324	C1=CC(=CC=C1N)S(=O)(=O)N=C(N)N	[M-H]	146.6	Benzenoids	20190304JAP_CCSdatabase_final.csv
5324	C1=CC(=CC=C1N)S(=O)(=O)N=C(N)N	[M+H]	149	Benzenoids	20190304JAP_CCSdatabase_final.csv
785	C1=CC(=CC=C1O)O	[M-H]	118.7	Benzenoids	20190304JAP_CCSdatabase_final.csv
785	C1=CC(=CC=C1O)O	[M+H]	113.9	Benzenoids	20190304JAP_CCSdatabase_final.csv
92859	C1=CC(=CC=C1O)OC2=C(C=C(C=C2I)C[C@@H](C(=O)O)N)I	[M-H]	188.2	Organic acids and derivatives	20190304JAP_CCSdatabase_final.csv
92859	C1=CC(=CC=C1O)OC2=C(C=C(C=C2I)C[C@@H](C(=O)O)N)I	[M+H]	198.4	Organic acids and derivatives	20190304JAP_CCSdatabase_final.csv
5281426	C1=CC(=CC2=C1C=CC(=O)O2)O	[M-H]	130.1	Benzenoids	20190304JAP_CCSdatabase_final.csv
936	C1=CC(=CN=C1)C(=O)N	[M+H]	126.7	Organoheterocyclic compounds	20190304JAP_CCSdatabase_final.csv
938	C1=CC(=CN=C1)C(=O)O	[M-H]	121.3	Organoheterocyclic compounds	20190304JAP_CCSdatabase_final.csv
938	C1=CC(=CN=C1)C(=O)O	[M+H]	123.9	Organoheterocyclic compounds	20190304JAP_CCSdatabase_final.csv
69371	C1=CC(=O)NC(=C1)O	[M-H]	114.2	Organoheterocyclic compounds	20190304JAP_CCSdatabase_final.csv
69371	C1=CC(=O)NC(=C1)O	[M+H]	119.7	Organoheterocyclic compounds	20190304JAP_CCSdatabase_final.csv
8871	C1=CC(=O)NC=C1	[M+H]	115.5	Organoheterocyclic compounds	20190304JAP_CCSdatabase_final.csv
72924	C1=CC(=O)NC=C1C(=O)O	[M+H]	129.1	Organoheterocyclic compounds	20190304JAP_CCSdatabase_final.csv
5900	C1=CC=C(C(=C1)C(=O)[O-])O.[Na+]	[M-H]	122.9	Benzenoids	20190304JAP_CCSdatabase_final.csv
161166	C1=CC=C(C(=C1)C(=O)C[C@@H](C(=O)O)N)N	[M+H]	149.8	Organic acids and derivatives	20190304JAP_CCSdatabase_final.csv
	C1=CC=C(C(=C1)C(=O)CC(C(=O)O)N)N	[M+H]	149.6	Organic acids and derivatives	20190304JAP_CCSdatabase_final.csv
5147	C1=CC=C(C(=C1)C(=O)N)O	[M-H]	121.5	Benzenoids	20190304JAP_CCSdatabase_final.csv
5147	C1=CC=C(C(=C1)C(=O)N)O	[M+H]	124.5	Benzenoids	20190304JAP_CCSdatabase_final.csv
10253	C1=CC=C(C(=C1)C(=O)NCC(=O)O)O	[M-H]	137.5	Benzenoids	20190304JAP_CCSdatabase_final.csv
227	C1=CC=C(C(=C1)C(=O)O)N	[M-H]	126.1	Benzenoids	20190304JAP_CCSdatabase_final.csv
338	C1=CC=C(C(=C1)C(=O)O)O	[M-H]	120.2	Benzenoids	20190304JAP_CCSdatabase_final.csv
6998	C1=CC=C(C(=C1)C=O)O	[M-H]	118.7	Benzenoids	20190304JAP_CCSdatabase_final.csv
92347	C1=CC=C(C(=C1)C2=C(C=CC(=C2)Cl)Cl)O	[M-H]	151.1	Benzenoids	20190304JAP_CCSdatabase_final.csv
11970	C1=CC=C(C(=C1)CC(=O)O)O	[M-H]	130.7	Benzenoids	20190304JAP_CCSdatabase_final.csv
873	C1=CC=C(C(=C1)CCC(=O)O)O	[M-H]	133.6	Benzenoids	20190304JAP_CCSdatabase_final.csv
7243	C1=CC=C(C(=C1)N)N	[M+H]	129.1	Benzenoids	20190304JAP_CCSdatabase_final.csv
5801	C1=CC=C(C(=C1)N)O	[M-H]	118.3	Benzenoids	20190304JAP_CCSdatabase_final.csv
5801	C1=CC=C(C(=C1)N)O	[M+H]	118.3	Benzenoids	20190304JAP_CCSdatabase_final.csv
5801	C1=CC=C(C(=C1)N)O	[M+H]	125.1	Benzenoids	20190304JAP_CCSdatabase_final.csv
6926	C1=CC=C(C(=C1)N)S(=O)(=O)O	[M-H]	131.9	Benzenoids	20190304JAP_CCSdatabase_final.csv
289	C1=CC=C(C(=C1)O)O	[M-H]	115.1	Benzenoids	20190304JAP_CCSdatabase_final.csv
444539	C1=CC=C(C=C1)/C=C/C(=O)O	[M+H]	144.4	Benzenoids	20190304JAP_CCSdatabase_final.csv
637511	C1=CC=C(C=C1)/C=C/C=O	[M+H]	121.5	Benzenoids	20190304JAP_CCSdatabase_final.csv
439616	C1=CC=C(C=C1)[C@@H](C(=O)O)O	[M-H]	130.6	Benzenoids	20190304JAP_CCSdatabase_final.csv
1608346	C1=CC=C(C=C1)C(=O)CC[NH2+]CC(=O)[O-]	[M-H]	160.2	Organic acids and derivatives	20190304JAP_CCSdatabase_final.csv
1608346	C1=CC=C(C=C1)C(=O)CC[NH2+]CC(=O)[O-]	[M+H]	148.5	Organic acids and derivatives	20190304JAP_CCSdatabase_final.csv
10773	C1=CC=C(C=C1)C(=O)NCC(=O)[O-].[Na+]	[M-H]	147.7	Benzenoids	20190304JAP_CCSdatabase_final.csv
10773	C1=CC=C(C=C1)C(=O)NCC(=O)[O-].[Na+]	[M+H]	145.9	Benzenoids	20190304JAP_CCSdatabase_final.csv
464	C1=CC=C(C=C1)C(=O)NCC(=O)O	[M-H]	142.4	Benzenoids	20190304JAP_CCSdatabase_final.csv
6140	C1=CC=C(C=C1)C[C@@H](C(=O)O)N	[M-H]	140.1	Organic acids and derivatives	20190304JAP_CCSdatabase_final.csv
6140	C1=CC=C(C=C1)C[C@@H](C(=O)O)N	[M-H]	140.6	Organic acids and derivatives	20190304JAP_CCSdatabase_final.csv
6140	C1=CC=C(C=C1)C[C@@H](C(=O)O)N	[M+H]	140.1	Organic acids and derivatives	20190304JAP_CCSdatabase_final.csv
6140	C1=CC=C(C=C1)C[C@@H](C(=O)O)N	[M+H]	140.8	Organic acids and derivatives	20190304JAP_CCSdatabase_final.csv
79688	C1=CC=C(C=C1)C2=C(C=C(C=C2)O)Cl	[M-H]	147	Benzenoids	20190304JAP_CCSdatabase_final.csv
11827	C1=CC=C(C=C1)C2=C(C=CC(=C2)Cl)O	[M-H]	143.5	Benzenoids	20190304JAP_CCSdatabase_final.csv
288439	C1=CC=C(C=C1)C2=C(N=NC(=N2)Cl)C3=CC=CC=C3	[M+H]	247.4	Organoheterocyclic compounds	20190304JAP_CCSdatabase_final.csv
70820	C1=CC=C(C=C1)C2=CC(=C(C(=C2)Cl)O)Cl	[M-H]	150.9	Benzenoids	20190304JAP_CCSdatabase_final.csv
7074	C1=CC=C(C=C1)C2=CC(=C(C=C2)O)Cl	[M-H]	146	Benzenoids	20190304JAP_CCSdatabase_final.csv
92258	C1=CC=C(C=C1)CC(=O)N[C@@H](CCC(=O)N)C(=O)O	[M-H]	168.6	Organic acids and derivatives	20190304JAP_CCSdatabase_final.csv
92258	C1=CC=C(C=C1)CC(=O)N[C@@H](CCC(=O)N)C(=O)O	[M+H]	159.9	Organic acids and derivatives	20190304JAP_CCSdatabase_final.csv
10243	C1=CC=C2C(=C1)C(=CC=N2)C(=O)O	[M-H]	134.6	Organoheterocyclic compounds	20190304JAP_CCSdatabase_final.csv
10243	C1=CC=C2C(=C1)C(=CC=N2)C(=O)O	[M+H]	133.5	Organoheterocyclic compounds	20190304JAP_CCSdatabase_final.csv
6452180	C1=CC=C2C(=C1)C(=CN2)C[C@@H](C(=O)N)N.Cl	[M-H]	143.5	Organoheterocyclic compounds	20190304JAP_CCSdatabase_final.csv
6452180	C1=CC=C2C(=C1)C(=CN2)C[C@@H](C(=O)N)N.Cl	[M+H]	151	Organoheterocyclic compounds	20190304JAP_CCSdatabase_final.csv
6305	C1=CC=C2C(=C1)C(=CN2)C[C@@H](C(=O)O)N	[M-H]	149.1	Organoheterocyclic compounds	20190304JAP_CCSdatabase_final.csv
6305	C1=CC=C2C(=C1)C(=CN2)C[C@@H](C(=O)O)N	[M+H]	151.3	Organoheterocyclic compounds	20190304JAP_CCSdatabase_final.csv
9060	C1=CC=C2C(=C1)C(=CN2)C[C@H](C(=O)O)N	[M-H]	142.6	Organoheterocyclic compounds	20190304JAP_CCSdatabase_final.csv
9060	C1=CC=C2C(=C1)C(=CN2)C[C@H](C(=O)O)N	[M-H]	151.7	Organoheterocyclic compounds	20190304JAP_CCSdatabase_final.csv
9060	C1=CC=C2C(=C1)C(=CN2)C[C@H](C(=O)O)N	[M+H]	150.6	Organoheterocyclic compounds	20190304JAP_CCSdatabase_final.csv
803	C1=CC=C2C(=C1)C(=CN2)CC(=O)C(=O)O	[M-H]	137.8	Organoheterocyclic compounds	20190304JAP_CCSdatabase_final.csv
397	C1=CC=C2C(=C1)C(=CN2)CC(=O)N	[M-H]	135.8	Organoheterocyclic compounds	20190304JAP_CCSdatabase_final.csv
397	C1=CC=C2C(=C1)C(=CN2)CC(=O)N	[M+H]	136.2	Organoheterocyclic compounds	20190304JAP_CCSdatabase_final.csv
802	C1=CC=C2C(=C1)C(=CN2)CC(=O)O	[M+H]	136.4	Organoheterocyclic compounds	20190304JAP_CCSdatabase_final.csv
71308323	C1=CC=C2C(=C1)C(=CN2)CC(O)S(=O)(=O)[O-].[Na+]	[M-H]	131	Organoheterocyclic compounds	20190304JAP_CCSdatabase_final.csv
71308323	C1=CC=C2C(=C1)C(=CN2)CC(O)S(=O)(=O)[O-].[Na+]	[M+H]	132.4	Organoheterocyclic compounds	20190304JAP_CCSdatabase_final.csv
1150	C1=CC=C2C(=C1)C(=CN2)CCN	[M+H]	127.6	Organoheterocyclic compounds	20190304JAP_CCSdatabase_final.csv
10685	C1=CC=C2C(=C1)C(=CN2)CCO	[M-H]	133	Organoheterocyclic compounds	20190304JAP_CCSdatabase_final.csv
10685	C1=CC=C2C(=C1)C(=CN2)CCO	[M+H]	133.8	Organoheterocyclic compounds	20190304JAP_CCSdatabase_final.csv
17530	C1=CC=C2C(=C1)C(=CN2)OS(=O)(=O)[O-].[K+]	[M-H]	143.4	Organoheterocyclic compounds	20190304JAP_CCSdatabase_final.csv
3845	C1=CC=C2C(=C1)C(=O)C=C(N2)C(=O)O	[M-H]	135.3	Organoheterocyclic compounds	20190304JAP_CCSdatabase_final.csv
3845	C1=CC=C2C(=C1)C(=O)C=C(N2)C(=O)O	[M+H]	136.6	Organoheterocyclic compounds	20190304JAP_CCSdatabase_final.csv
9215	C1=CC=C2C(=C1)C=C3C=CC=CC3=N2	[M*]	132	Organoheterocyclic compounds	20190304JAP_CCSdatabase_final.csv
9215	C1=CC=C2C(=C1)C=C3C=CC=CC3=N2	[M+H]	133.7	Organoheterocyclic compounds	20190304JAP_CCSdatabase_final.csv
42030	C1=CC=C2C(=C1)C=C3C=CC4=C5C3=C2C=C(C5=CC=C4)O	[M-H]	162.5	Benzenoids	20190304JAP_CCSdatabase_final.csv
7124	C1=CC=C2C(=C1)C=CC(=N2)C(=O)O	[M+H]	132.3	Organoheterocyclic compounds	20190304JAP_CCSdatabase_final.csv
37766	C1=CC=C2C(=C1)C=CC3=C2C=C(C4=CC=CC=C34)O	[M-H]	157.3	Benzenoids	20190304JAP_CCSdatabase_final.csv
104987	C1=CC=C2C(=C1)C=CC3=C2C=C4C=CC=C5C4=C3C=C5	[M*]	150.9	Benzenoids	20190304JAP_CCSdatabase_final.csv
9171	C1=CC=C2C(=C1)C=CC3=C2C=CC4=CC=CC=C43	[M*]	144.9	Benzenoids	20190304JAP_CCSdatabase_final.csv
9171	C1=CC=C2C(=C1)C=CC3=C2C=CC4=CC=CC=C43	[M+H]	147.2	Benzenoids	20190304JAP_CCSdatabase_final.csv
995	C1=CC=C2C(=C1)C=CC3=CC=CC=C32	[M*]	131.2	Benzenoids	20190304JAP_CCSdatabase_final.csv
995	C1=CC=C2C(=C1)C=CC3=CC=CC=C32	[M+H]	132.6	Benzenoids	20190304JAP_CCSdatabase_final.csv
9170	C1=CC=C2C(=C1)C3=CC=CC=C3C4=CC=CC=C24	[M*]	143.6	Benzenoids	20190304JAP_CCSdatabase_final.csv
9170	C1=CC=C2C(=C1)C3=CC=CC=C3C4=CC=CC=C24	[M+H]	147.5	Benzenoids	20190304JAP_CCSdatabase_final.csv
6697	C1=CC=C2C(=C1)C3=CC=CC4=C3C(=CC=C4)C2=O	[M*]	142.9	Benzenoids	20190304JAP_CCSdatabase_final.csv
6697	C1=CC=C2C(=C1)C3=CC=CC4=C3C(=CC=C4)C2=O	[M+H]	144	Benzenoids	20190304JAP_CCSdatabase_final.csv
9154	C1=CC=C2C(=C1)C3=CC=CC4=C3C2=CC=C4	[M*]	136.7	Benzenoids	20190304JAP_CCSdatabase_final.csv
9154	C1=CC=C2C(=C1)C3=CC=CC4=C3C2=CC=C4	[M+H]	137.2	Benzenoids	20190304JAP_CCSdatabase_final.csv
5430	C1=CC=C2C(=C1)NC(=N2)C3=CSC=N3	[M-H]	144.1	Organoheterocyclic compounds	20190304JAP_CCSdatabase_final.csv
7091	C1=CC=C2C=C(C(=CC2=C1)O)O	[M-H]	131.3	Benzenoids	20190304JAP_CCSdatabase_final.csv
14160	C1=CC=C2C=C3C(=CC2=C1)C(=O)C4=CC=CC=C4C3=O	[M+H]	155.7	Benzenoids	20190304JAP_CCSdatabase_final.csv
8418	C1=CC=C2C=C3C=CC=CC3=CC2=C1	[M*]	132.3	Benzenoids	20190304JAP_CCSdatabase_final.csv
8418	C1=CC=C2C=C3C=CC=CC3=CC2=C1	[M+H]	133.3	Benzenoids	20190304JAP_CCSdatabase_final.csv
9158	C1=CC=C2C=C3C4=CC=CC5=C4C(=CC=C5)C3=CC2=C1	[M*]	151.2	Benzenoids	20190304JAP_CCSdatabase_final.csv
9158	C1=CC=C2C=C3C4=CC=CC5=C4C(=CC=C5)C3=CC2=C1	[M+H]	152.6	Benzenoids	20190304JAP_CCSdatabase_final.csv
931	C1=CC=C2C=CC=CC2=C1	[M+H]	119.2	Benzenoids	20190304JAP_CCSdatabase_final.csv
931	C1=CC=C2C=CC=CC2=C1	[M*]	117.7	Benzenoids	20190304JAP_CCSdatabase_final.csv
9153	C1=CC=C2C3=C4C(=CC=C3)C5=CC=CC=C5C4=CC2=C1	[M*]	150.2	Benzenoids	20190304JAP_CCSdatabase_final.csv
2336	C1=CC=C2C3=C4C(=CC2=C1)C=CC5=C4C(=CC=C5)C=C3	[M*]	149.5	Benzenoids	20190304JAP_CCSdatabase_final.csv
2336	C1=CC=C2C3=C4C(=CC2=C1)C=CC5=C4C(=CC=C5)C=C3	[M+H]	150.3	Benzenoids	20190304JAP_CCSdatabase_final.csv
9108	C1=CC=C2C3=C4C(=CC2=C1)C=CC5=C4C(=CC6=CC=CC=C56)C=C3	[M+H]	164.6	Benzenoids	20190304JAP_CCSdatabase_final.csv
5699	C1=CC2=C(C(=C1)O)NC(=CC2=O)C(=O)O	[M-H]	134.6	Organoheterocyclic compounds	20190304JAP_CCSdatabase_final.csv
5699	C1=CC2=C(C(=C1)O)NC(=CC2=O)C(=O)O	[M+H]	140.4	Organoheterocyclic compounds	20190304JAP_CCSdatabase_final.csv
3806	C1=CC2=C(C(=O)C=CC2=O)C(=C1)O	[M-H]	130.8	Benzenoids	20190304JAP_CCSdatabase_final.csv
439280	C1=CC2=C(C=C1O)C(=CN2)C[C@@H](C(=O)O)N	[M-H]	147	Organoheterocyclic compounds	20190304JAP_CCSdatabase_final.csv
439280	C1=CC2=C(C=C1O)C(=CN2)C[C@@H](C(=O)O)N	[M-H]	151.9	Organoheterocyclic compounds	20190304JAP_CCSdatabase_final.csv
439280	C1=CC2=C(C=C1O)C(=CN2)C[C@@H](C(=O)O)N	[M+H]	155.6	Organoheterocyclic compounds	20190304JAP_CCSdatabase_final.csv
1826	C1=CC2=C(C=C1O)C(=CN2)CC(=O)O	[M-H]	137.3	Organoheterocyclic compounds	20190304JAP_CCSdatabase_final.csv
1826	C1=CC2=C(C=C1O)C(=CN2)CC(=O)O	[M+H]	141.1	Organoheterocyclic compounds	20190304JAP_CCSdatabase_final.csv
5202	C1=CC2=C(C=C1O)C(=CN2)CCN	[M-H]	147.1	Organoheterocyclic compounds	20190304JAP_CCSdatabase_final.csv
5202	C1=CC2=C(C=C1O)C(=CN2)CCN	[M+H]	150.9	Organoheterocyclic compounds	20190304JAP_CCSdatabase_final.csv
93552	C1=CC2=C(C=CC(=C2)O)C=C1O	[M-H]	137	Benzenoids	20190304JAP_CCSdatabase_final.csv
6749	C1=CC2=C(C=CC=C2O)C(=C1)O	[M-H]	133.2	Benzenoids	20190304JAP_CCSdatabase_final.csv
6724	C1=CC2=C3C(=C1)C(=O)C(=O)C3=CC=C2	[M+H]	143.8	Benzenoids	20190304JAP_CCSdatabase_final.csv
160814	C1=CC2=C3C(=C1)C(=O)C(=O)C4=CC=CC(=C43)C=C2	[M+H]	142.6	Benzenoids	20190304JAP_CCSdatabase_final.csv
11050	C1=CC2=C3C(=C1)C=CC(=O)C3=CC=C2	[M+H]	133	Benzenoids	20190304JAP_CCSdatabase_final.csv
9161	C1=CC2=C3C(=C1)C=CC3=CC=C2	[M*]	123.3	Benzenoids	20190304JAP_CCSdatabase_final.csv
9161	C1=CC2=C3C(=C1)C=CC3=CC=C2	[M+H]	124.2	Benzenoids	20190304JAP_CCSdatabase_final.csv
21387	C1=CC2=C3C(=C1)C=CC4=C(C=CC(=C43)C=C2)O	[M-H]	148	Benzenoids	20190304JAP_CCSdatabase_final.csv
37880	C1=CC2=C3C(=C1)C=CC4=C3C(=CC5=C4C=CC=C5O)C=C2	[M-H]	162.6	Benzenoids	20190304JAP_CCSdatabase_final.csv
31423	C1=CC2=C3C(=C1)C=CC4=CC=CC(=C43)C=C2	[M*]	136.1	Benzenoids	20190304JAP_CCSdatabase_final.csv
31423	C1=CC2=C3C(=C1)C=CC4=CC=CC(=C43)C=C2	[M+H]	137	Benzenoids	20190304JAP_CCSdatabase_final.csv
9142	C1=CC2=C3C(=C1)C4=CC=CC5=C4C(=CC=C5)C3=CC=C2	[M*]	149.6	Benzenoids	20190304JAP_CCSdatabase_final.csv
9142	C1=CC2=C3C(=C1)C4=CC=CC5=C4C(=CC=C5)C3=CC=C2	[M+H]	151.5	Benzenoids	20190304JAP_CCSdatabase_final.csv
9117	C1=CC2=C3C(=C1)C4=CC=CC5=C4C6=C(C=C5)C=CC(=C36)C=C2	[M*]	154	Benzenoids	20190304JAP_CCSdatabase_final.csv
9117	C1=CC2=C3C(=C1)C4=CC=CC5=C4C6=C(C=C5)C=CC(=C36)C=C2	[M+H]	155.5	Benzenoids	20190304JAP_CCSdatabase_final.csv
9115	C1=CC2=C3C4=C1C=CC5=C4C6=C(C=C5)C=CC7=C6C3=C(C=C2)C=C7	[M*]	159.9	Benzenoids	20190304JAP_CCSdatabase_final.csv
9115	C1=CC2=C3C4=C1C=CC5=C4C6=C(C=C5)C=CC7=C6C3=C(C=C2)C=C7	[M+H]	162.6	Benzenoids	20190304JAP_CCSdatabase_final.csv
6175	C1=CN(C(=O)N=C1N)[C@H]2[C@@H]([C@@H]([C@H](O2)CO)O)O	[M-H]	150	Organic oxygen compounds	20190304JAP_CCSdatabase_final.csv
6175	C1=CN(C(=O)N=C1N)[C@H]2[C@@H]([C@@H]([C@H](O2)CO)O)O	[M+H]	151.6	Organic oxygen compounds	20190304JAP_CCSdatabase_final.csv
66535	C1=CN(C(=O)N=C1N)[C@H]2[C@@H]([C@@H]([C@H](O2)CO)OP(=O)(O)O)O	[M-H]	169.8	Organic oxygen compounds	20190304JAP_CCSdatabase_final.csv
66535	C1=CN(C(=O)N=C1N)[C@H]2[C@@H]([C@@H]([C@H](O2)CO)OP(=O)(O)O)O	[M+H]	169.9	Organic oxygen compounds	20190304JAP_CCSdatabase_final.csv
16219084	C1=CN(C(=O)N=C1N)[C@H]2[C@@H]([C@@H]([C@H](O2)COP(=O)([O-])OP(=O)(O)OP(=O)(O)[O-])O)O.[Na+].[Na+]	[M-H]	185.6	Organic oxygen compounds	20190304JAP_CCSdatabase_final.csv
16219084	C1=CN(C(=O)N=C1N)[C@H]2[C@@H]([C@@H]([C@H](O2)COP(=O)([O-])OP(=O)(O)OP(=O)(O)[O-])O)O.[Na+].[Na+]	[M+H]	188.5	Organic oxygen compounds	20190304JAP_CCSdatabase_final.csv
6131	C1=CN(C(=O)N=C1N)[C@H]2[C@@H]([C@@H]([C@H](O2)COP(=O)(O)O)O)O	[M-H]	165.1	Organic oxygen compounds	20190304JAP_CCSdatabase_final.csv
6131	C1=CN(C(=O)N=C1N)[C@H]2[C@@H]([C@@H]([C@H](O2)COP(=O)(O)O)O)O	[M+H]	167.1	Organic oxygen compounds	20190304JAP_CCSdatabase_final.csv
6132	C1=CN(C(=O)N=C1N)[C@H]2[C@@H]([C@@H]([C@H](O2)COP(=O)(O)OP(=O)(O)O)O)O	[M-H]	174.2	Organic oxygen compounds	20190304JAP_CCSdatabase_final.csv
6132	C1=CN(C(=O)N=C1N)[C@H]2[C@@H]([C@@H]([C@H](O2)COP(=O)(O)OP(=O)(O)O)O)O	[M+H]	175.6	Organic oxygen compounds	20190304JAP_CCSdatabase_final.csv
123727	C1=CN(C(=O)N=C1N)[C@H]2[C@@H]([C@@H]([C@H](O2)COP(=O)(O)OP(=O)(O)OCCN)O)O	[M-H]	188.1	Organic oxygen compounds	20190304JAP_CCSdatabase_final.csv
417654	C1=CN(C(=O)N=C1N)C2C3C(C(O2)CO)OP(=O)(O3)O	[M-H]	164.6	Organic oxygen compounds	20190304JAP_CCSdatabase_final.csv
417654	C1=CN(C(=O)N=C1N)C2C3C(C(O2)CO)OP(=O)(O3)O	[M+H]	163.2	Organic oxygen compounds	20190304JAP_CCSdatabase_final.csv
56845789	C1=CN(C(=O)NC1=O)[C@@H]2[C@H]([C@H]([C@@H](O2)COP(=O)([O-])OP(=O)([O-])O[C@H]3[C@H]([C@@H]([C@@H]([C@@H](O3)CO)O)O)O)O)O.[Na+].[Na+]	[M-H]	207.3	Organic oxygen compounds	20190304JAP_CCSdatabase_final.csv
6029	C1=CN(C(=O)NC1=O)[C@H]2[C@@H]([C@@H]([C@H](O2)CO)O)O	[M-H]	152	Organic oxygen compounds	20190304JAP_CCSdatabase_final.csv
6029	C1=CN(C(=O)NC1=O)[C@H]2[C@@H]([C@@H]([C@H](O2)CO)O)O	[M+H]	161.1	Organic oxygen compounds	20190304JAP_CCSdatabase_final.csv
16220076	C1=CN(C(=O)NC1=O)[C@H]2[C@@H]([C@@H]([C@H](O2)COP(=O)([O-])OP(=O)([O-])O[C@@H]3[C@@H]([C@H]([C@@H]([C@H](O3)C(=O)[O-])O)O)O)O)O.[Na+].[Na+].[Na+]	[M-H]	211.9	Organic oxygen compounds	20190304JAP_CCSdatabase_final.csv
88265	C1=CN(C(=O)NC1=O)[C@H]2[C@@H]([C@@H]([C@H](O2)COP(=O)([O-])OP(=O)([O-])OP(=O)(O)[O-])O)O.[Na+].[Na+].[Na+]	[M-H]	180.1	Organic oxygen compounds	20190304JAP_CCSdatabase_final.csv
88265	C1=CN(C(=O)NC1=O)[C@H]2[C@@H]([C@@H]([C@H](O2)COP(=O)([O-])OP(=O)([O-])OP(=O)(O)[O-])O)O.[Na+].[Na+].[Na+]	[M+H]	186.9	Organic oxygen compounds	20190304JAP_CCSdatabase_final.csv
11957711	C1=CN(C(=O)NC1=O)[C@H]2[C@@H]([C@@H]([C@H](O2)COP(=O)([O-])OP(=O)(O)[O-])O)O.[Na+].[Na+]	[M-H]	172.9	Organic oxygen compounds	20190304JAP_CCSdatabase_final.csv
11957711	C1=CN(C(=O)NC1=O)[C@H]2[C@@H]([C@@H]([C@H](O2)COP(=O)([O-])OP(=O)(O)[O-])O)O.[Na+].[Na+]	[M+H]	176.5	Organic oxygen compounds	20190304JAP_CCSdatabase_final.csv
6030	C1=CN(C(=O)NC1=O)[C@H]2[C@@H]([C@@H]([C@H](O2)COP(=O)(O)O)O)O	[M-H]	162.3	Organic oxygen compounds	20190304JAP_CCSdatabase_final.csv
6030	C1=CN(C(=O)NC1=O)[C@H]2[C@@H]([C@@H]([C@H](O2)COP(=O)(O)O)O)O	[M+H]	167	Organic oxygen compounds	20190304JAP_CCSdatabase_final.csv
8629	C1=CN(C(=O)NC1=O)[C@H]2[C@@H]([C@@H]([C@H](O2)COP(=O)(O)OP(=O)(O)O[C@@H]3[C@@H]([C@H]([C@@H]([C@H](O3)CO)O)O)O)O)O	[M-H]	207.3	Organic oxygen compounds	20190304JAP_CCSdatabase_final.csv
71308627	C1=CN(C(=O)NC1=O)[C@H]2[C@@H]([C@@H]([C@H](O2)COP(=O)(O)OP(=O)(O)OP(=O)(O)O)O)O.C(C(CO)(CO)N)O	[M-H]	180.1	Organic oxygen compounds	20190304JAP_CCSdatabase_final.csv
71308627	C1=CN(C(=O)NC1=O)[C@H]2[C@@H]([C@@H]([C@H](O2)COP(=O)(O)OP(=O)(O)OP(=O)(O)O)O)O.C(C(CO)(CO)N)O	[M+H]	186.9	Organic oxygen compounds	20190304JAP_CCSdatabase_final.csv
73000	C1=CN=C2C(=N1)C(=O)N=C(N2)N	[M-H]	128.7	Organoheterocyclic compounds	20190304JAP_CCSdatabase_final.csv
73000	C1=CN=C2C(=N1)C(=O)N=C(N2)N	[M+H]	128.8	Organoheterocyclic compounds	20190304JAP_CCSdatabase_final.csv
10250	C1=CN=C2C(=N1)C(=O)NC(=O)N2	[M-H]	126.6	Organoheterocyclic compounds	20190304JAP_CCSdatabase_final.csv
10250	C1=CN=C2C(=N1)C(=O)NC(=O)N2	[M+H]	134.6	Organoheterocyclic compounds	20190304JAP_CCSdatabase_final.csv
12473	C1=CNC(=C1)C(=O)O	[M-H]	114.3	Organoheterocyclic compounds	20190304JAP_CCSdatabase_final.csv
1174	C1=CNC(=O)NC1=O	[M-H]	113.5	Organoheterocyclic compounds	20190304JAP_CCSdatabase_final.csv
1174	C1=CNC(=O)NC1=O	[M+H]	126.2	Organoheterocyclic compounds	20190304JAP_CCSdatabase_final.csv
105085	C1=CNC=C(C1=O)O	[M+H]	125.9	Organoheterocyclic compounds	20190304JAP_CCSdatabase_final.csv
65110	C1=NC(=C(N1[C@H]2[C@@H]([C@@H]([C@H](O2)COP(=O)(O)O)O)O)N)C(=O)N	[M-H]	170.5	Organic oxygen compounds	20190304JAP_CCSdatabase_final.csv
65110	C1=NC(=C(N1[C@H]2[C@@H]([C@@H]([C@H](O2)COP(=O)(O)O)O)O)N)C(=O)N	[M+H]	171.9	Organic oxygen compounds	20190304JAP_CCSdatabase_final.csv
60961	C1=NC(=C2C(=N1)N(C=N2)[C@H]3[C@@H]([C@@H]([C@H](O3)CO)O)O)N	[M-H]	157.7	Organoheterocyclic compounds	20190304JAP_CCSdatabase_final.csv
60961	C1=NC(=C2C(=N1)N(C=N2)[C@H]3[C@@H]([C@@H]([C@H](O3)CO)O)O)N	[M+H]	155.5	Organoheterocyclic compounds	20190304JAP_CCSdatabase_final.csv
60961	C1=NC(=C2C(=N1)N(C=N2)[C@H]3[C@@H]([C@@H]([C@H](O3)CO)O)O)N	[M+H]	161.6	Organoheterocyclic compounds	20190304JAP_CCSdatabase_final.csv
20712	C1=NC(=C2C(=N1)N(C=N2)[C@H]3[C@@H]([C@@H]([C@H](O3)COP(=O)([O-])[O-])O)O)N.[Na+].[Na+]	[M-H]	174.1	Organoheterocyclic compounds	20190304JAP_CCSdatabase_final.csv
20712	C1=NC(=C2C(=N1)N(C=N2)[C@H]3[C@@H]([C@@H]([C@H](O3)COP(=O)([O-])[O-])O)O)N.[Na+].[Na+]	[M+H]	171.5	Organoheterocyclic compounds	20190304JAP_CCSdatabase_final.csv
16218834	C1=NC(=C2C(=N1)N(C=N2)[C@H]3[C@@H]([C@@H]([C@H](O3)COP(=O)([O-])OP(=O)([O-])OC4[C@@H]([C@H]([C@@H]([C@H](O4)CO)O)O)O)O)O)N.[Na+].[Na+]	[M-H]	217.8	Organic oxygen compounds	20190304JAP_CCSdatabase_final.csv
16218834	C1=NC(=C2C(=N1)N(C=N2)[C@H]3[C@@H]([C@@H]([C@H](O3)COP(=O)([O-])OP(=O)([O-])OC4[C@@H]([C@H]([C@@H]([C@H](O4)CO)O)O)O)O)O)N.[Na+].[Na+]	[M+H]	216.5	Organic oxygen compounds	20190304JAP_CCSdatabase_final.csv
6022	C1=NC(=C2C(=N1)N(C=N2)[C@H]3[C@@H]([C@@H]([C@H](O3)COP(=O)(O)OP(=O)(O)O)O)O)N	[M-H]	184.8	Organic oxygen compounds	20190304JAP_CCSdatabase_final.csv
6022	C1=NC(=C2C(=N1)N(C=N2)[C@H]3[C@@H]([C@@H]([C@H](O3)COP(=O)(O)OP(=O)(O)O)O)O)N	[M+H]	187.2	Organic oxygen compounds	20190304JAP_CCSdatabase_final.csv
5957	C1=NC(=C2C(=N1)N(C=N2)[C@H]3[C@@H]([C@@H]([C@H](O3)COP(=O)(O)OP(=O)(O)OP(=O)(O)O)O)O)N	[M-H]	188.3	Organic oxygen compounds	20190304JAP_CCSdatabase_final.csv
5957	C1=NC(=C2C(=N1)N(C=N2)[C@H]3[C@@H]([C@@H]([C@H](O3)COP(=O)(O)OP(=O)(O)OP(=O)(O)O)O)O)N	[M+H]	196.7	Organic oxygen compounds	20190304JAP_CCSdatabase_final.csv
439155	C1=NC(=C2C(=N1)N(C=N2)[C@H]3[C@@H]([C@@H]([C@H](O3)CSCC[C@@H](C(=O)O)N)O)O)N	[M-H]	186.4	Organoheterocyclic compounds	20190304JAP_CCSdatabase_final.csv
439155	C1=NC(=C2C(=N1)N(C=N2)[C@H]3[C@@H]([C@@H]([C@H](O3)CSCC[C@@H](C(=O)O)N)O)O)N	[M+H]	183	Organoheterocyclic compounds	20190304JAP_CCSdatabase_final.csv
16218837	C1=NC(=C2C(=N1)N(C=N2)C3C(C(C(O3)COP(=O)(O)OP(=O)(O)OCC(C(C(C=O)O)O)O)O)O)N.[Na]	[M-H]	202.1	Organic oxygen compounds	20190304JAP_CCSdatabase_final.csv
16218837	C1=NC(=C2C(=N1)N(C=N2)C3C(C(C(O3)COP(=O)(O)OP(=O)(O)OCC(C(C(C=O)O)O)O)O)O)N.[Na]	[M-H]	206.8	Organic oxygen compounds	20190304JAP_CCSdatabase_final.csv
16218837	C1=NC(=C2C(=N1)N(C=N2)C3C(C(C(O3)COP(=O)(O)OP(=O)(O)OCC(C(C(C=O)O)O)O)O)O)N.[Na]	[M+H]	212.5	Organic oxygen compounds	20190304JAP_CCSdatabase_final.csv
2024	C1=NC(=C2C(=N1)N(C=N2)C3C4C(C(O3)CO)OP(=O)(O4)O)N	[M-H]	169.4	Organoheterocyclic compounds	20190304JAP_CCSdatabase_final.csv
2024	C1=NC(=C2C(=N1)N(C=N2)C3C4C(C(O3)CO)OP(=O)(O4)O)N	[M+H]	168	Organoheterocyclic compounds	20190304JAP_CCSdatabase_final.csv
6021	C1=NC(=O)C2=C(N1)N(C=N2)[C@H]3[C@@H]([C@@H]([C@H](O3)CO)O)O	[M-H]	159.6	Organoheterocyclic compounds	20190304JAP_CCSdatabase_final.csv
6021	C1=NC(=O)C2=C(N1)N(C=N2)[C@H]3[C@@H]([C@@H]([C@H](O3)CO)O)O	[M+H]	158.2	Organoheterocyclic compounds	20190304JAP_CCSdatabase_final.csv
7156952	C1=NC(=O)C2=C(N1)N(C=N2)[C@H]3[C@@H]([C@@H]([C@H](O3)COP(=O)([O-])OP(=O)([O-])[O-])O)O	[M+H]	186.5	Organoheterocyclic compounds	20190304JAP_CCSdatabase_final.csv
53486218	C1=NC(=O)C2=C(N1)N(C=N2)[C@H]3[C@@H]([C@@H]([C@H](O3)COP(=O)([O-])OP(=O)([O-])OP(=O)(O)[O-])O)O.[Na+].[Na+].[Na+]	[M-H]	189.2	Organoheterocyclic compounds	20190304JAP_CCSdatabase_final.csv
53486218	C1=NC(=O)C2=C(N1)N(C=N2)[C@H]3[C@@H]([C@@H]([C@H](O3)COP(=O)([O-])OP(=O)([O-])OP(=O)(O)[O-])O)O.[Na+].[Na+].[Na+]	[M+H]	193.1	Organoheterocyclic compounds	20190304JAP_CCSdatabase_final.csv
8582	C1=NC(=O)C2=C(N1)N(C=N2)[C@H]3[C@@H]([C@@H]([C@H](O3)COP(=O)(O)O)O)O	[M-H]	171.4	Organoheterocyclic compounds	20190304JAP_CCSdatabase_final.csv
8582	C1=NC(=O)C2=C(N1)N(C=N2)[C@H]3[C@@H]([C@@H]([C@H](O3)COP(=O)(O)O)O)O	[M+H]	174.9	Organoheterocyclic compounds	20190304JAP_CCSdatabase_final.csv
764	C1=NC2=C(N1)C(=O)N=C(N2)N	[M+H]	131	Organoheterocyclic compounds	20190304JAP_CCSdatabase_final.csv
790	C1=NC2=C(N1)C(=O)N=CN2	[M-H]	121	Organoheterocyclic compounds	20190304JAP_CCSdatabase_final.csv
790	C1=NC2=C(N1)C(=O)N=CN2	[M+H]	130.5	Organoheterocyclic compounds	20190304JAP_CCSdatabase_final.csv
1188	C1=NC2=C(N1)C(=O)NC(=O)N2	[M-H]	122.2	Organoheterocyclic compounds	20190304JAP_CCSdatabase_final.csv
1188	C1=NC2=C(N1)C(=O)NC(=O)N2	[M+H]	129.7	Organoheterocyclic compounds	20190304JAP_CCSdatabase_final.csv
1188	C1=NC2=C(N1)C(=O)NC(=O)N2	[M+H]	137.3	Organoheterocyclic compounds	20190304JAP_CCSdatabase_final.csv
6802	C1=NC2=C(N1[C@H]3[C@@H]([C@@H]([C@H](O3)CO)O)O)NC(=NC2=O)N	[M-H]	163	Organoheterocyclic compounds	20190304JAP_CCSdatabase_final.csv
6802	C1=NC2=C(N1[C@H]3[C@@H]([C@@H]([C@H](O3)CO)O)O)NC(=NC2=O)N	[M+H]	163.5	Organoheterocyclic compounds	20190304JAP_CCSdatabase_final.csv
64959	C1=NC2=C(N1[C@H]3[C@@H]([C@@H]([C@H](O3)CO)O)O)NC(=O)NC2=O	[M-H]	159.5	Organoheterocyclic compounds	20190304JAP_CCSdatabase_final.csv
64959	C1=NC2=C(N1[C@H]3[C@@H]([C@@H]([C@H](O3)CO)O)O)NC(=O)NC2=O	[M+H]	162.1	Organoheterocyclic compounds	20190304JAP_CCSdatabase_final.csv
21712	C1=NC2=C(N1[C@H]3[C@@H]([C@@H]([C@H](O3)COP(=O)([O-])[O-])O)O)NC(=NC2=O)N.[Na+].[Na+]	[M-H]	171.7	Organoheterocyclic compounds	20190304JAP_CCSdatabase_final.csv
21712	C1=NC2=C(N1[C@H]3[C@@H]([C@@H]([C@H](O3)COP(=O)([O-])[O-])O)O)NC(=NC2=O)N.[Na+].[Na+]	[M+H]	181.1	Organoheterocyclic compounds	20190304JAP_CCSdatabase_final.csv
10287649	C1=NC2=C(N1[C@H]3[C@@H]([C@@H]([C@H](O3)COP(=O)([O-])[O-])O)O)NC(=O)NC2=O.[Na+].[Na+]	[M-H]	166.2	Organoheterocyclic compounds	20190304JAP_CCSdatabase_final.csv
10287649	C1=NC2=C(N1[C@H]3[C@@H]([C@@H]([C@H](O3)COP(=O)([O-])[O-])O)O)NC(=O)NC2=O.[Na+].[Na+]	[M+H]	175.5	Organoheterocyclic compounds	20190304JAP_CCSdatabase_final.csv
6804	C1=NC2=C(N1[C@H]3[C@@H]([C@@H]([C@H](O3)COP(=O)(O)O)O)O)NC(=NC2=O)N	[M-H]	169.4	Organoheterocyclic compounds	20190304JAP_CCSdatabase_final.csv
6804	C1=NC2=C(N1[C@H]3[C@@H]([C@@H]([C@H](O3)COP(=O)(O)O)O)O)NC(=NC2=O)N	[M+H]	179.6	Organoheterocyclic compounds	20190304JAP_CCSdatabase_final.csv
71312088	C1=NC2=C(N1C3C(C(C(O3)COP(=O)([O-])OP(=O)([O-])OC4C(C(C(C(O4)CO)O)O)O)O)O)NC(=NC2=O)N.[Na+].[Na+]	[M-H]	208.8	Organoheterocyclic compounds	20190304JAP_CCSdatabase_final.csv
71312088	C1=NC2=C(N1C3C(C(C(O3)COP(=O)([O-])OP(=O)([O-])OC4C(C(C(C(O4)CO)O)O)O)O)O)NC(=NC2=O)N.[Na+].[Na+]	[M+H]	227.7	Organoheterocyclic compounds	20190304JAP_CCSdatabase_final.csv
44134758	C1=NC2=C(N1C3C(C(C(O3)COP(=O)(O)OP(=O)([O-])OP(=O)([O-])[O-])O)O)NC(=NC2=O)N.[Na+].[Na+].[Na+]	[M-H]	193.4	Organoheterocyclic compounds	20190304JAP_CCSdatabase_final.csv
730	C1=NC2=C(N1C3C(C(C(O3)COP(=O)(O)OP(=O)(O)O)O)O)NC(=NC2=O)N	[M-H]	182.5	Organoheterocyclic compounds	20190304JAP_CCSdatabase_final.csv
730	C1=NC2=C(N1C3C(C(C(O3)COP(=O)(O)OP(=O)(O)O)O)O)NC(=NC2=O)N	[M+H]	192.1	Organoheterocyclic compounds	20190304JAP_CCSdatabase_final.csv
190	C1=NC2=NC=NC(=C2N1)N	[M-H]	120.6	Organoheterocyclic compounds	20190304JAP_CCSdatabase_final.csv
190	C1=NC2=NC=NC(=C2N1)N	[M+H]	125.6	Organoheterocyclic compounds	20190304JAP_CCSdatabase_final.csv
76219	C1=NC2=NC=NC(=C2N1)N.Cl	[M-H]	119.9	Organoheterocyclic compounds	20190304JAP_CCSdatabase_final.csv
76219	C1=NC2=NC=NC(=C2N1)N.Cl	[M+H]	124.8	Organoheterocyclic compounds	20190304JAP_CCSdatabase_final.csv
1175	C12=C(NC(=O)N1)NC(=O)NC2=O	[M-H]	126.2	Organoheterocyclic compounds	20190304JAP_CCSdatabase_final.csv
1175	C12=C(NC(=O)N1)NC(=O)NC2=O	[M+H]	130.5	Organoheterocyclic compounds	20190304JAP_CCSdatabase_final.csv
123591	C12=C3C4=C5C6=C1C7=C8C9=C1C%10=C%11C(=C29)C3=C2C3=C4C4=C5C5=C9C6=C7C6=C7C8=C1C1=C8C%10=C%10C%11=C2C2=C3C3=C4C4=C5C5=C%11C%12=C(C6=C95)C7=C1C1=C%12C5=C%11C4=C3C3=C5C(=C81)C%10=C23	[M*]	210.8	Benzenoids	20190304JAP_CCSdatabase_final.csv
16131935	C12=C3C4=C5C6=C7C8=C9C%10=C%11C%12=C%13C%10=C%10C8=C5C1=C%10C1=C%13C5=C8C1=C2C1=C3C2=C3C%10=C%13C%14=C3C1=C8C1=C3C5=C%12C5=C8C%11=C%11C9=C7C7=C9C6=C4C2=C2C%10=C4C(=C29)C2=C6C(=C8C8=C9C6=C4C%13=C9C(=C%141)C3=C85)C%11=C27	[M*]	226.1	Benzenoids	20190304JAP_CCSdatabase_final.csv
98792	C1C(=NC2=C(N1)NC(=NC2=O)N)CNC3=CC=C(C=C3)C(=O)N[C@@H](CCC(=O)O)C(=O)O	[M+H]	192.4	Organoheterocyclic compounds	20190304JAP_CCSdatabase_final.csv
71311277	C1C(=NC2=C(N1)NC(=NC2=O)N)CNC3=CC=C(C=C3)C(=O)N[C@@H](CCC(=O)O)C(=O)O.O.O	[M-H]	192	Organoheterocyclic compounds	20190304JAP_CCSdatabase_final.csv
15150	C1C(N(C2=C(N1)NC(=NC2=O)N)C=O)CNC3=CC=C(C=C3)C(=O)N[C@@H](CCC(=O)[O-])C(=O)[O-].[Ca+2]	[M-H]	201.7	Organoheterocyclic compounds	20190304JAP_CCSdatabase_final.csv
15150	C1C(N(C2=C(N1)NC(=NC2=O)N)C=O)CNC3=CC=C(C=C3)C(=O)N[C@@H](CCC(=O)[O-])C(=O)[O-].[Ca+2]	[M+H]	197.5	Organoheterocyclic compounds	20190304JAP_CCSdatabase_final.csv
439201	C1C[C@H](N(C1)C(=O)[C@@H]2CCCN2C(=O)[C@H](CCCN=C(N)N)N)C(=O)NCC(=O)N[C@@H](CC3=CC=CC=C3)C(=O)N[C@@H](CO)C(=O)N4CCC[C@H]4C(=O)N[C@@H](CC5=CC=CC=C5)C(=O)N[C@@H](CCCN=C(N)N)C(=O)O	[M+H]	314.6	Organic acids and derivatives	20190304JAP_CCSdatabase_final.csv
638678	C1C[C@H](N(C1)C(=O)[C@H](CC2=CN=CN2)NC(=O)[C@@H]3CCC(=O)N3)C(=O)N	[M-H]	185.9	Organic acids and derivatives	20190304JAP_CCSdatabase_final.csv
638678	C1C[C@H](N(C1)C(=O)[C@H](CC2=CN=CN2)NC(=O)[C@@H]3CCC(=O)N3)C(=O)N	[M+H]	179.7	Organic acids and derivatives	20190304JAP_CCSdatabase_final.csv
145742	C1C[C@H](NC1)C(=O)O	[M-H]	125.1	Organic acids and derivatives	20190304JAP_CCSdatabase_final.csv
145742	C1C[C@H](NC1)C(=O)O	[M+H]	125.4	Organic acids and derivatives	20190304JAP_CCSdatabase_final.csv
145742	C1C[C@H](NC1)C(=O)O	[M+H]	125.8	Organic acids and derivatives	20190304JAP_CCSdatabase_final.csv
5884	C1C=CN(C=C1C(=O)N)[C@H]2[C@@H]([C@@H]([C@H](O2)COP(=O)(O)OP(=O)(O)OC[C@@H]3[C@H]([C@H]([C@@H](O3)N4C=NC5=C(N=CN=C54)N)OP(=O)(O)O)O)O)O	[M-H]	246.7	Organoheterocyclic compounds	20190304JAP_CCSdatabase_final.csv
5884	C1C=CN(C=C1C(=O)N)[C@H]2[C@@H]([C@@H]([C@H](O2)COP(=O)(O)OP(=O)(O)OC[C@@H]3[C@H]([C@H]([C@@H](O3)N4C=NC5=C(N=CN=C54)N)OP(=O)(O)O)O)O)O	[M+H]	232.4	Organoheterocyclic compounds	20190304JAP_CCSdatabase_final.csv
6853	C1C2=CC=CC=C2C3=CC=CC=C31	[M*]	130.1	Benzenoids	20190304JAP_CCSdatabase_final.csv
7405	C1CC(=O)N[C@@H]1C(=O)O	[M-H]	124.6	Organic acids and derivatives	20190304JAP_CCSdatabase_final.csv
7405	C1CC(=O)N[C@@H]1C(=O)O	[M+H]	130.6	Organic acids and derivatives	20190304JAP_CCSdatabase_final.csv
439685	C1CC(=O)N[C@H]1C(=O)O	[M-H]	124.6	Organic acids and derivatives	20190304JAP_CCSdatabase_final.csv
439685	C1CC(=O)N[C@H]1C(=O)O	[M+H]	130.4	Organic acids and derivatives	20190304JAP_CCSdatabase_final.csv
535	C1CC1(C(=O)O)N	[M-H]	135.6	Organic acids and derivatives	20190304JAP_CCSdatabase_final.csv
6734	C1CC2=CC=CC3=C2C1=CC=C3	[M*]	127.7	Benzenoids	20190304JAP_CCSdatabase_final.csv
16219444	C1CCC(CC1)N.C1CCC(CC1)N.C([C@H](COP(=O)(O)O)O)O	[M-H]	127.4	Organic oxygen compounds	20190304JAP_CCSdatabase_final.csv
439227	C1CCN[C@@H](C1)C(=O)O	[M-H]	128.9	Organic acids and derivatives	20190304JAP_CCSdatabase_final.csv
439227	C1CCN[C@@H](C1)C(=O)O	[M+H]	127.9	Organic acids and derivatives	20190304JAP_CCSdatabase_final.csv
849	C1CCNC(C1)C(=O)O	[M-H]	129.3	Organic acids and derivatives	20190304JAP_CCSdatabase_final.csv
849	C1CCNC(C1)C(=O)O	[M+H]	127.4	Organic acids and derivatives	20190304JAP_CCSdatabase_final.csv
2181	C1CCNC(C1)C2=CN=CC=C2	[M+H]	139.3	Organoheterocyclic compounds	20190304JAP_CCSdatabase_final.csv
6758	CC(=C)[C@H]1CC2=C(O1)C=CC3=C2O[C@@H]4COC5=CC(=C(C=C5[C@@H]4C3=O)OC)OC	[M-H]	201.8	Organoheterocyclic compounds	20190304JAP_CCSdatabase_final.csv
6758	CC(=C)[C@H]1CC2=C(O1)C=CC3=C2O[C@@H]4COC5=CC(=C(C=C5[C@@H]4C3=O)OC)OC	[M+H]	198.4	Organoheterocyclic compounds	20190304JAP_CCSdatabase_final.csv
445995	CC(=CCC/C(=C/COP(=O)(O)OP(=O)(O)O)/C)C	[M-H]	167.5	Lipids and lipid-like molecules	20190304JAP_CCSdatabase_final.csv
92180	CC(=CCNC1=NC=NC2=C1NC=N2)C	[M-H]	150.8	Organoheterocyclic compounds	20190304JAP_CCSdatabase_final.csv
92180	CC(=CCNC1=NC=NC2=C1NC=N2)C	[M+H]	145.4	Organoheterocyclic compounds	20190304JAP_CCSdatabase_final.csv
6238	CC(=O)[C@]1(CC[C@@H]2[C@@]1(CC[C@H]3[C@H]2CCC4=CC(=O)CC[C@]34C)C)O	[M-H]	187	Lipids and lipid-like molecules	20190304JAP_CCSdatabase_final.csv
6238	CC(=O)[C@]1(CC[C@@H]2[C@@]1(CC[C@H]3[C@H]2CCC4=CC(=O)CC[C@]34C)C)O	[M+H]	186.4	Lipids and lipid-like molecules	20190304JAP_CCSdatabase_final.csv
440573	CC(=O)[C@]1(CCC2[C@@]1(CC[C@H]3[C@H]2CC=C4[C@@]3(CC[C@@H](C4)O)C)C)O	[M+H]	189.2	Lipids and lipid-like molecules	20190304JAP_CCSdatabase_final.csv
8955	CC(=O)[C@H]1CC[C@@H]2[C@@]1(CC[C@H]3[C@H]2CC=C4[C@@]3(CC[C@@H](C4)O)C)C	[M+H]	176.1	Lipids and lipid-like molecules	20190304JAP_CCSdatabase_final.csv
105074	CC(=O)[C@H]1CC[C@@H]2[C@@]1(CC[C@H]3[C@H]2CC=C4[C@@]3(CC[C@@H](C4)OS(=O)(=O)O)C)C	[M-H]	206.2	Lipids and lipid-like molecules	20190304JAP_CCSdatabase_final.csv
5994	CC(=O)[C@H]1CC[C@@H]2[C@@]1(CC[C@H]3[C@H]2CCC4=CC(=O)CC[C@]34C)C	[M+H]	185.5	Lipids and lipid-like molecules	20190304JAP_CCSdatabase_final.csv
99715	CC(=O)N[C@@H](CC(=O)N)C(=O)O	[M-H]	137.4	Organic acids and derivatives	20190304JAP_CCSdatabase_final.csv
65065	CC(=O)N[C@@H](CC(=O)O)C(=O)O	[M-H]	131.3	Organic acids and derivatives	20190304JAP_CCSdatabase_final.csv
74839	CC(=O)N[C@@H](CC1=CC=CC=C1)C(=O)O	[M-H]	147.1	Organic acids and derivatives	20190304JAP_CCSdatabase_final.csv
70914	CC(=O)N[C@@H](CCC(=O)O)C(=O)O	[M-H]	137	Organic acids and derivatives	20190304JAP_CCSdatabase_final.csv
92907	CC(=O)N[C@@H](CCCCN)C(=O)O	[M-H]	145.1	Organic acids and derivatives	20190304JAP_CCSdatabase_final.csv
92907	CC(=O)N[C@@H](CCCCN)C(=O)O	[M+H]	145.6	Organic acids and derivatives	20190304JAP_CCSdatabase_final.csv
448580	CC(=O)N[C@@H](CCSC)C(=O)O	[M-H]	142.7	Organic acids and derivatives	20190304JAP_CCSdatabase_final.csv
16069658	CC(=O)N[C@@H]1[C@H]([C@@H]([C@H](O[C@@H]1OP(=O)([O-])OP(=O)([O-])OC[C@@H]2[C@H]([C@H]([C@@H](O2)N3C=CC(=O)NC3=O)O)O)CO)O)O.[Na+].[Na+]	[M-H]	223.9	Organic oxygen compounds	20190304JAP_CCSdatabase_final.csv
16069658	CC(=O)N[C@@H]1[C@H]([C@@H]([C@H](O[C@@H]1OP(=O)([O-])OP(=O)([O-])OC[C@@H]2[C@H]([C@H]([C@@H](O2)N3C=CC(=O)NC3=O)O)O)CO)O)O.[Na+].[Na+]	[M+H]	210.4	Organic oxygen compounds	20190304JAP_CCSdatabase_final.csv
439454	CC(=O)N[C@@H]1[C@H]([C@@H]([C@H](O[C@H]1N)CO)O)O	[M-H]	155.3	Organic oxygen compounds	20190304JAP_CCSdatabase_final.csv
24139	CC(=O)N[C@@H]1[C@H]([C@@H]([C@H](O[C@H]1O)CO)O)O	[M-H]	153.1	Organic oxygen compounds	20190304JAP_CCSdatabase_final.csv
16220073	CC(=O)N[C@@H]1[C@H]([C@H]([C@H](OC1OP(=O)([O-])OP(=O)([O-])OC[C@@H]2[C@H]([C@H](C(O2)N3C=CC(=O)NC3=O)O)O)CO)O)O.[Na+].[Na+]	[M-H]	223.9	Organic oxygen compounds	20190304JAP_CCSdatabase_final.csv
16220073	CC(=O)N[C@@H]1[C@H]([C@H]([C@H](OC1OP(=O)([O-])OP(=O)([O-])OC[C@@H]2[C@H]([C@H](C(O2)N3C=CC(=O)NC3=O)O)O)CO)O)O.[Na+].[Na+]	[M+H]	216.2	Organic oxygen compounds	20190304JAP_CCSdatabase_final.csv
445063	CC(=O)N[C@@H]1[C@H](C[C@](O[C@H]1[C@@H]([C@@H](CO)O)O)(C(=O)O)O)O	[M-H]	158.4	Organic oxygen compounds	20190304JAP_CCSdatabase_final.csv
445063	CC(=O)N[C@@H]1[C@H](C[C@](O[C@H]1[C@@H]([C@@H](CO)O)O)(C(=O)O)O)O	[M-H]	163.7	Organic oxygen compounds	20190304JAP_CCSdatabase_final.csv
445063	CC(=O)N[C@@H]1[C@H](C[C@](O[C@H]1[C@@H]([C@@H](CO)O)O)(C(=O)O)O)O	[M+H]	166.6	Organic oxygen compounds	20190304JAP_CCSdatabase_final.csv
439917	CC(=O)N[C@H](CC1=CNC2=CC=CC=C21)C(=O)O	[M-H]	161.4	Organoheterocyclic compounds	20190304JAP_CCSdatabase_final.csv
439917	CC(=O)N[C@H](CC1=CNC2=CC=CC=C21)C(=O)O	[M+H]	154.7	Organoheterocyclic compounds	20190304JAP_CCSdatabase_final.csv
17788000	CC(=O)N1CCCC1C(=O)[O-]	[M-H]	134.1	Organic acids and derivatives	20190304JAP_CCSdatabase_final.csv
2002	CC(=O)NC(CC1=CNC2=CC=CC=C21)C(=O)O	[M-H]	158.6	Organoheterocyclic compounds	20190304JAP_CCSdatabase_final.csv
2002	CC(=O)NC(CC1=CNC2=CC=CC=C21)C(=O)O	[M+H]	153.4	Organoheterocyclic compounds	20190304JAP_CCSdatabase_final.csv
352294	CC(=O)NC(CO)C(=O)O	[M-H]	127.5	Organic acids and derivatives	20190304JAP_CCSdatabase_final.csv
1983	CC(=O)NC1=CC=C(C=C1)O	[M-H]	132.7	Benzenoids	20190304JAP_CCSdatabase_final.csv
1983	CC(=O)NC1=CC=C(C=C1)O	[M+H]	139.3	Benzenoids	20190304JAP_CCSdatabase_final.csv
25201943	CC(=O)NCCC[NH2+]CCCC[NH2+]CCC[NH3+]	[M+H]	158.1	Organic acids and derivatives	20190304JAP_CCSdatabase_final.csv
903	CC(=O)NCCC1=CNC2=C1C=C(C=C2)O	[M-H]	150.6	Organoheterocyclic compounds	20190304JAP_CCSdatabase_final.csv
903	CC(=O)NCCC1=CNC2=C1C=C(C=C2)O	[M+H]	149.8	Organoheterocyclic compounds	20190304JAP_CCSdatabase_final.csv
896	CC(=O)NCCC1=CNC2=C1C=C(C=C2)OC	[M-H]	155.9	Organoheterocyclic compounds	20190304JAP_CCSdatabase_final.csv
896	CC(=O)NCCC1=CNC2=C1C=C(C=C2)OC	[M+H]	153.5	Organoheterocyclic compounds	20190304JAP_CCSdatabase_final.csv
18189	CC(=O)NCCCC(=O)O	[M-H]	131.2	Organic acids and derivatives	20190304JAP_CCSdatabase_final.csv
122356	CC(=O)NCCCCN	[M+H]	128.4	Organic acids and derivatives	20190304JAP_CCSdatabase_final.csv
1	CC(=O)OC(CC(=O)[O-])C[N+](C)(C)C	[M+H]	143.5	Lipids and lipid-like molecules	20190304JAP_CCSdatabase_final.csv
99478	CC(=O)OC[C@@H](C(=O)O)N	[M+H]	130.5	Organic acids and derivatives	20190304JAP_CCSdatabase_final.csv
5055	CC(=O)OC1=CC=CC(=C1)O	[M-H]	126.5	Benzenoids	20190304JAP_CCSdatabase_final.csv
5744	CC(=O)OCC(=O)[C@]1(CC[C@@H]2[C@@]1(C[C@@H]([C@H]3[C@H]2CCC4=CC(=O)CC[C@]34C)O)C)O	[M-H]	196.5	Lipids and lipid-like molecules	20190304JAP_CCSdatabase_final.csv
5744	CC(=O)OCC(=O)[C@]1(CC[C@@H]2[C@@]1(C[C@@H]([C@H]3[C@H]2CCC4=CC(=O)CC[C@]34C)O)C)O	[M+H]	198.7	Lipids and lipid-like molecules	20190304JAP_CCSdatabase_final.csv
5952	CC(=O)OCC(=O)[C@H]1CC[C@@H]2[C@@]1(CC[C@H]3[C@H]2CCC4=CC(=O)CC[C@]34C)C	[M+H]	197.1	Lipids and lipid-like molecules	20190304JAP_CCSdatabase_final.csv
187	CC(=O)OCC[N+](C)(C)C	[M*]	129.2	Organic acids and derivatives	20190304JAP_CCSdatabase_final.csv
612	CC(C(=O)O)O	[M-H]	151.9	Organic acids and derivatives	20190304JAP_CCSdatabase_final.csv
6119	CC(C)(C(=O)O)N	[M-H]	129	Organic acids and derivatives	20190304JAP_CCSdatabase_final.csv
6119	CC(C)(C(=O)O)N	[M+H]	123.9	Organic acids and derivatives	20190304JAP_CCSdatabase_final.csv
6950339	CC(C)(C)[C@H](C(=O)[O-])[NH3+]	[M-H]	131.4	Organic acids and derivatives	20190304JAP_CCSdatabase_final.csv
5405	CC(C)(C)C1=CC=C(C=C1)C(CCCN2CCC(CC2)C(C3=CC=CC=C3)(C4=CC=CC=C4)O)O	[M+H]	226.3	Benzenoids	20190304JAP_CCSdatabase_final.csv
30479	CC(C)(C)C1=NN=C(N(C1=O)N)SC	[M+H]	149.5	Organoheterocyclic compounds	20190304JAP_CCSdatabase_final.csv
210602	CC(C)(CN)C1=CC=CC=C1	[M+H]	186.3	Benzenoids	20190304JAP_CCSdatabase_final.csv
443753	CC(C)(CO)[C@H](C(=O)NCCC(=O)[O-])O.CC(C)(CO)[C@H](C(=O)NCCC(=O)[O-])O.[Ca+2]	[M+H]	203	Organic oxygen compounds	20190304JAP_CCSdatabase_final.csv
6613	CC(C)(CO)[C@H](C(=O)NCCC(=O)O)O	[M-H]	146.6	Organic oxygen compounds	20190304JAP_CCSdatabase_final.csv
6613	CC(C)(CO)[C@H](C(=O)NCCC(=O)O)O	[M+H]	129.8	Organic oxygen compounds	20190304JAP_CCSdatabase_final.csv
644066	CC(C)(COP(=O)(O)OP(=O)(O)OC[C@@H]1[C@H]([C@H]([C@@H](O1)N2C=NC3=C(N=CN=C32)N)O)OP(=O)(O)O)[C@H](C(=O)NCCC(=O)NCCSC(=O)CC(=O)O)O	[M-H]	252.2	Organoheterocyclic compounds	20190304JAP_CCSdatabase_final.csv
16219482	CC(C)(COP(=O)(O)OP(=O)(O)OCC1C(C(C(O1)N2C=NC3=C(N=CN=C32)N)O)OP(=O)(O)O)C(C(=O)NCCC(=O)NCCSC(=O)CC(C)(CC(=O)O)O)O.[Na]	[M-H]	261.7	Organoheterocyclic compounds	20190304JAP_CCSdatabase_final.csv
16219482	CC(C)(COP(=O)(O)OP(=O)(O)OCC1C(C(C(O1)N2C=NC3=C(N=CN=C32)N)O)OP(=O)(O)O)C(C(=O)NCCC(=O)NCCSC(=O)CC(C)(CC(=O)O)O)O.[Na]	[M+H]	265.5	Organoheterocyclic compounds	20190304JAP_CCSdatabase_final.csv
7015709	CC(C)[C@@H](C(=O)N[C@@H](CC1=CC=C(C=C1)O)C(=O)N[C@@H](C(C)C)C(=O)[O-])[NH3+]	[M-H]	185.2	Organic acids and derivatives	20190304JAP_CCSdatabase_final.csv
7015709	CC(C)[C@@H](C(=O)N[C@@H](CC1=CC=C(C=C1)O)C(=O)N[C@@H](C(C)C)C(=O)[O-])[NH3+]	[M+H]	188.4	Organic acids and derivatives	20190304JAP_CCSdatabase_final.csv
6287	CC(C)[C@@H](C(=O)O)N	[M-H]	124.9	Organic acids and derivatives	20190304JAP_CCSdatabase_final.csv
6287	CC(C)[C@@H](C(=O)O)N	[M+H]	120.8	Organic acids and derivatives	20190304JAP_CCSdatabase_final.csv
10855600	CC(C)C(=O)NCC(=O)O	[M-H]	140.7	Organic acids and derivatives	20190304JAP_CCSdatabase_final.csv
2520	CC(C)C(CCCN(C)CCC1=CC(=C(C=C1)OC)OC)(C#N)C2=CC(=C(C=C2)OC)OC	[M+H]	203.4	Benzenoids	20190304JAP_CCSdatabase_final.csv
36511	CC(C)C[C@@H](C(=O)N[C@@H](CCSC)C(=O)N)NC(=O)CNC(=O)[C@H](CC1=CC=CC=C1)NC(=O)[C@H](CC2=CC=CC=C2)NC(=O)[C@H](CCC(=O)N)NC(=O)[C@H](CCC(=O)N)NC(=O)[C@@H]3CCCN3C(=O)[C@H](CCCCN)NC(=O)[C@@H]4CCCN4C(=O)[C@H](CCCN=C(N)N)N	[M+H]	362	Organic acids and derivatives	20190304JAP_CCSdatabase_final.csv
6106	CC(C)C[C@@H](C(=O)O)N	[M-H]	131.8	Organic acids and derivatives	20190304JAP_CCSdatabase_final.csv
6106	CC(C)C[C@@H](C(=O)O)N	[M+H]	134.7	Organic acids and derivatives	20190304JAP_CCSdatabase_final.csv
6106	CC(C)C[C@@H](C(=O)O)N	[M+H]	135.1	Organic acids and derivatives	20190304JAP_CCSdatabase_final.csv
461776	CC(C)C[C@@H](C(=O)O)NC(=O)[C@H](CC1=CC=CC=C1)NC(=O)CNC(=O)CNC(=O)[C@H](CC2=CC=C(C=C2)O)N	[M-H]	222.6	Organic acids and derivatives	20190304JAP_CCSdatabase_final.csv
461776	CC(C)C[C@@H](C(=O)O)NC(=O)[C@H](CC1=CC=CC=C1)NC(=O)CNC(=O)CNC(=O)[C@H](CC2=CC=C(C=C2)O)N	[M+H]	228.1	Organic acids and derivatives	20190304JAP_CCSdatabase_final.csv
70912	CC(C)C[C@@H](C(=O)O)NC(=O)C	[M-H]	140.7	Organic acids and derivatives	20190304JAP_CCSdatabase_final.csv
439524	CC(C)C[C@H](C(=O)O)N	[M-H]	133.4	Organic acids and derivatives	20190304JAP_CCSdatabase_final.csv
439524	CC(C)C[C@H](C(=O)O)N	[M+H]	127.9	Organic acids and derivatives	20190304JAP_CCSdatabase_final.csv
54738	CC(C)C1(C(=O)NC(=N1)C2=C(C=CC=N2)C(=O)O)C	[M-H]	164.4	Organoheterocyclic compounds	20190304JAP_CCSdatabase_final.csv
54738	CC(C)C1(C(=O)NC(=N1)C2=C(C=CC=N2)C(=O)O)C	[M+H]	156.8	Organoheterocyclic compounds	20190304JAP_CCSdatabase_final.csv
	CC(C)CC(C(=O)O)N	[M-H]	134.8	Organic acids and derivatives	20190304JAP_CCSdatabase_final.csv
	CC(C)CC(C(=O)O)N	[M+H]	131.1	Organic acids and derivatives	20190304JAP_CCSdatabase_final.csv
	CC(C)CCCC(C)CCCC(C)CCCC(C)CC(=O)OC[C@H](COP(=O)(O)OCC(CO)O)OC(=O)CC(C)CCCC(C)CCCC(C)CCCC(C)C.[Na]	[M-H]	296.3	Lipids and lipid-like molecules	20190304JAP_CCSdatabase_final.csv
9379	CC(CC(=O)[O-])O.[Na+]	[M-H]	137.1	Organic acids and derivatives	20190304JAP_CCSdatabase_final.csv
1081	CC(CC(=O)O)(C(=O)O)O	[M-H]	123.1	Organic acids and derivatives	20190304JAP_CCSdatabase_final.csv
1662	CC(CC(=O)O)(CC(=O)O)O	[M-H]	126.9	Organic acids and derivatives	20190304JAP_CCSdatabase_final.csv
10349	CC(CC(=O)O)C(=O)O	[M-H]	123.9	Organic acids and derivatives	20190304JAP_CCSdatabase_final.csv
12284	CC(CC(=O)O)CC(=O)O	[M-H]	126.3	Organic acids and derivatives	20190304JAP_CCSdatabase_final.csv
27928	CC(CCC(=O)NCC(=O)[O-])C1CCC2C1(CCC3C2C(CC4C3(CCC(C4)O)C)O)C.[Na+]	[M-H]	200.6	Lipids and lipid-like molecules	20190304JAP_CCSdatabase_final.csv
27928	CC(CCC(=O)NCC(=O)[O-])C1CCC2C1(CCC3C2C(CC4C3(CCC(C4)O)C)O)C.[Na+]	[M+H]	196.9	Lipids and lipid-like molecules	20190304JAP_CCSdatabase_final.csv
14849362	CC(CCC(=O)NCC(=O)[O-])C1CCC2C1(CCC3C2CCC4C3(CCC(C4)O)C)C.[Na+]	[M-H]	218.2	Lipids and lipid-like molecules	20190304JAP_CCSdatabase_final.csv
12046	CC(CCC(=O)O)C(=O)O	[M-H]	126.3	Organic acids and derivatives	20190304JAP_CCSdatabase_final.csv
4388803	CC(CCC(=O)O)C1CCC2C1(CCC3C2CCC4C3(CCC(C4)OS(=O)(=O)O)C)C	[M-H]	211.5	Lipids and lipid-like molecules	20190304JAP_CCSdatabase_final.csv
64956	CC(CN)C(=O)O	[M+H]	124.2	Organic acids and derivatives	20190304JAP_CCSdatabase_final.csv
6438711	CC/C=C/CC(/C=C/C1C(C(CC(O1)O)O)C/C=C/CCCC(=O)O)O	[M-H]	190.5	Lipids and lipid-like molecules	20190304JAP_CCSdatabase_final.csv
445580	CC/C=C\C/C=C\C/C=C\C/C=C\C/C=C\C/C=C\CCC(=O)O	[M-H]	190.5	Lipids and lipid-like molecules	20190304JAP_CCSdatabase_final.csv
445580	CC/C=C\C/C=C\C/C=C\C/C=C\C/C=C\C/C=C\CCC(=O)O	[M+H]	183.5	Lipids and lipid-like molecules	20190304JAP_CCSdatabase_final.csv
5280934	CC/C=C\C/C=C\C/C=C\CCCCCCCC(=O)O	[M-H]	173.9	Lipids and lipid-like molecules	20190304JAP_CCSdatabase_final.csv
5280934	CC/C=C\C/C=C\C/C=C\CCCCCCCC(=O)O	[M-H]	174.6	Lipids and lipid-like molecules	20190304JAP_CCSdatabase_final.csv
	CC/C=C\C/C=C\C[C@@H](/C=C\C=C\C=C\[C@@H](C/C=C\CCC(=O)O)O)O	[M-H]	192.9	Lipids and lipid-like molecules	20190304JAP_CCSdatabase_final.csv
7018721	CC[C@@H](C(=O)NCC(=O)O)NC(=O)CC[C@@H](C(=O)O)N	[M-H]	160.8	Organic acids and derivatives	20190304JAP_CCSdatabase_final.csv
7018721	CC[C@@H](C(=O)NCC(=O)O)NC(=O)CC[C@@H](C(=O)O)N	[M+H]	164.5	Organic acids and derivatives	20190304JAP_CCSdatabase_final.csv
99288	CC[C@@H](C)[C@@H](C(=O)O)N	[M-H]	133.4	Organic acids and derivatives	20190304JAP_CCSdatabase_final.csv
76551	CC[C@@H](C)[C@H](C(=O)O)N	[M-H]	132	Organic acids and derivatives	20190304JAP_CCSdatabase_final.csv
76551	CC[C@@H](C)[C@H](C(=O)O)N	[M+H]	127.6	Organic acids and derivatives	20190304JAP_CCSdatabase_final.csv
84029	CC[C@@H]1[C@@]([C@@H]([C@H](C(=O)[C@@H](C[C@@]([C@@H]([C@H]([C@@H]([C@H](C(=O)O1)C)O[C@H]2C[C@@]([C@H]([C@@H](O2)C)O)(C)OC)C)O[C@H]3[C@@H]([C@H](C[C@H](O3)C)N(C)C)O)(C)OC)C)C)O)(C)O	[M+H]	266.7	Organic oxygen compounds	20190304JAP_CCSdatabase_final.csv
3081372	CC[C@H](C)[C@@H](C(=O)N[C@@H](CC1=CN=CN1)C(=O)N2CCC[C@H]2C(=O)N[C@@H](CC3=CC=CC=C3)C(=O)N[C@@H](CC4=CN=CN4)C(=O)N[C@@H](CC(C)C)C(=O)O)NC(=O)[C@H](CC5=CC=C(C=C5)O)NC(=O)[C@H](C(C)C)NC(=O)[C@H](CCCN=C(N)N)NC(=O)[C@H](CC(=O)O)N	[M+H]	356.5	Organic acids and derivatives	20190304JAP_CCSdatabase_final.csv
172198	CC[C@H](C)[C@@H](C(=O)N[C@@H](CC1=CN=CN1)C(=O)N2CCC[C@H]2C(=O)N[C@@H](CC3=CC=CC=C3)C(=O)O)NC(=O)[C@H](CC4=CC=C(C=C4)O)NC(=O)[C@H](C(C)C)NC(=O)[C@H](CCCN=C(N)N)NC(=O)[C@H](CC(=O)O)N	[M+H]	314	Organic acids and derivatives	20190304JAP_CCSdatabase_final.csv
6306	CC[C@H](C)[C@@H](C(=O)O)N	[M-H]	130.6	Organic acids and derivatives	20190304JAP_CCSdatabase_final.csv
6306	CC[C@H](C)[C@@H](C(=O)O)N	[M-H]	132.4	Organic acids and derivatives	20190304JAP_CCSdatabase_final.csv
6306	CC[C@H](C)[C@@H](C(=O)O)N	[M+H]	133.3	Organic acids and derivatives	20190304JAP_CCSdatabase_final.csv
6306	CC[C@H](C)[C@@H](C(=O)O)N	[M+H]	134.3	Organic acids and derivatives	20190304JAP_CCSdatabase_final.csv
	CC[C@H](C)[C@H](C(=O)O)N	[M-H]	132.7	Organic acids and derivatives	20190304JAP_CCSdatabase_final.csv
439302	CC[C@H](C)[C@H]1C(=O)N[C@H](C(=O)N[C@H](C(=O)N[C@@H](CSSC[C@@H](C(=O)N[C@H](C(=O)N1)CC2=CC=C(C=C2)O)N)C(=O)N3CCC[C@H]3C(=O)N[C@@H](CC(C)C)C(=O)NCC(=O)N)CC(=O)N)CCC(=O)N	[M-H]	297.9	Organic acids and derivatives	20190304JAP_CCSdatabase_final.csv
	CC\1=C(/C(=C/C2=C(C(=C(N2)/C=C\3/C(=C(C(=O)N3)C)C=C)C)CCC(=O)O)/N/C1=C\C4=NC(=O)C(=C4C)C=C)CCC(=O)O	[M-H]	246.1	Organoheterocyclic compounds	20190304JAP_CCSdatabase_final.csv
	CC\1=C(/C(=C/C2=C(C(=C(N2)/C=C\3/C(=C(C(=O)N3)C)C=C)C)CCC(=O)O)/N/C1=C\C4=NC(=O)C(=C4C)C=C)CCC(=O)O	[M+H]	244.1	Organoheterocyclic compounds	20190304JAP_CCSdatabase_final.csv
6616	CC1(C2CCC(C2)C1=C)C	[M+H]	129.8	Lipids and lipid-like molecules	20190304JAP_CCSdatabase_final.csv
2537	CC1(C2CCC1(C(=O)C2)C)C	[M+H]	141.9	Lipids and lipid-like molecules	20190304JAP_CCSdatabase_final.csv
5282367	CC1=C(C(=O)C2=CC=CC=C2C1=O)C/C=C(\C)/CC/C=C(\C)/CC/C=C(\C)/CCC=C(C)C	[M+H]	197.4	Benzenoids	20190304JAP_CCSdatabase_final.csv
92729	CC1=C(C=C2CC[C@@](OC2=C1C)(C)CCC[C@H](C)CCC[C@H](C)CCCC(C)C)O	[M-H]	207.9	Lipids and lipid-like molecules	20190304JAP_CCSdatabase_final.csv
92729	CC1=C(C=C2CC[C@@](OC2=C1C)(C)CCC[C@H](C)CCC[C@H](C)CCCC(C)C)O	[M+H]	209.8	Lipids and lipid-like molecules	20190304JAP_CCSdatabase_final.csv
14985	CC1=C(C2=C(CC[C@@](O2)(C)CCC[C@H](C)CCC[C@H](C)CCCC(C)C)C(=C1O)C)C	[M-H]	208.9	Lipids and lipid-like molecules	20190304JAP_CCSdatabase_final.csv
14985	CC1=C(C2=C(CC[C@@](O2)(C)CCC[C@H](C)CCC[C@H](C)CCCC(C)C)C(=C1O)C)C	[M+H]	213	Lipids and lipid-like molecules	20190304JAP_CCSdatabase_final.csv
3715	CC1=C(C2=C(N1C(=O)C3=CC=C(C=C3)Cl)C=CC(=C2)OC)CC(=O)O	[M+H]	182.4	Organoheterocyclic compounds	20190304JAP_CCSdatabase_final.csv
	CC1=C(C2=CC3=NC(=CC4=NC(=CC5=C(C(=C(N5)C=C1N2)C=C)C)C(=C4CCC(=O)O)C)C(=C3C)CCC(=O)O)C=C	[M+H]	241.7	Organoheterocyclic compounds	20190304JAP_CCSdatabase_final.csv
65040	CC1=C(NC(=O)N=C1)N	[M+H]	121.1	Organoheterocyclic compounds	20190304JAP_CCSdatabase_final.csv
65040	CC1=C(NC(=O)N=C1)N	[M+H]	125.7	Organoheterocyclic compounds	20190304JAP_CCSdatabase_final.csv
1130	CC1=C(SC=[N+]1CC2=CN=C(N=C2N)C)CCO	[M*]	163	Organoheterocyclic compounds	20190304JAP_CCSdatabase_final.csv
10761	CC1=C(SC=[N+]1CC2=CN=C(N=C2N)C)CCOP(=O)(O)O.[Cl-]	[M+H]	171.1	Organoheterocyclic compounds	20190304JAP_CCSdatabase_final.csv
1132	CC1=C(SC=[N+]1CC2=CN=C(N=C2N)C)CCOP(=O)(O)OP(=O)(O)O	[M-H]	178.1	Organoheterocyclic compounds	20190304JAP_CCSdatabase_final.csv
1132	CC1=C(SC=[N+]1CC2=CN=C(N=C2N)C)CCOP(=O)(O)OP(=O)(O)O	[M+H]	182	Organoheterocyclic compounds	20190304JAP_CCSdatabase_final.csv
13068	CC1=C2C=CC=CC2=CC3=CC=CC=C13	[M*]	134.8	Benzenoids	20190304JAP_CCSdatabase_final.csv
9958	CC1=CC(=C(C=C1)O)O	[M-H]	121.5	Benzenoids	20190304JAP_CCSdatabase_final.csv
795540	CC1=CC(=CC=C1)OCC(=O)NC2=C(C=CC(=C2)Cl)C	[M-H]	143.7	Benzenoids	20190304JAP_CCSdatabase_final.csv
5343	CC1=CC(=NC(=N1)C)NS(=O)(=O)C2=CC=C(C=C2)N	[M-H]	170	Benzenoids	20190304JAP_CCSdatabase_final.csv
5327	CC1=CC(=NC(=N1)NS(=O)(=O)C2=CC=C(C=C2)N)C	[M-H]	168.1	Benzenoids	20190304JAP_CCSdatabase_final.csv
65280	CC1=CC(=NO1)NS(=O)(=O)C2=CC=C(C=C2)NC(=O)C	[M-H]	171.5	Benzenoids	20190304JAP_CCSdatabase_final.csv
65280	CC1=CC(=NO1)NS(=O)(=O)C2=CC=C(C=C2)NC(=O)C	[M+H]	170.4	Benzenoids	20190304JAP_CCSdatabase_final.csv
5280896	CC1=CC(=O)CC([C@]1(/C=C/C(=C\C(=O)O)/C)O)(C)C	[M-H]	173.8	Lipids and lipid-like molecules	20190304JAP_CCSdatabase_final.csv
5280896	CC1=CC(=O)CC([C@]1(/C=C/C(=C\C(=O)O)/C)O)(C)C	[M+H]	159.5	Lipids and lipid-like molecules	20190304JAP_CCSdatabase_final.csv
11304	CC1=CC=C(C2=CC=CC=C12)C	[M*]	126.9	Benzenoids	20190304JAP_CCSdatabase_final.csv
11304	CC1=CC=C(C2=CC=CC=C12)C	[M+H]	129.4	Benzenoids	20190304JAP_CCSdatabase_final.csv
91637	CC1=CC=CC=C1C(=O)NCC(=O)O	[M-H]	153.1	Benzenoids	20190304JAP_CCSdatabase_final.csv
7002	CC1=CC=CC2=CC=CC=C12	[M*]	122.1	Benzenoids	20190304JAP_CCSdatabase_final.csv
7002	CC1=CC=CC2=CC=CC=C12	[M+H]	123.7	Benzenoids	20190304JAP_CCSdatabase_final.csv
3220	CC1=CC2=C(C(=C1)O)C(=O)C3=C(C2=O)C=C(C=C3O)O	[M-H]	156.4	Benzenoids	20190304JAP_CCSdatabase_final.csv
3220	CC1=CC2=C(C(=C1)O)C(=O)C3=C(C2=O)C=C(C=C3O)O	[M+H]	160.3	Benzenoids	20190304JAP_CCSdatabase_final.csv
11387	CC1=CC2=C(C=C1)C=C(C=C2)C	[M*]	126.3	Benzenoids	20190304JAP_CCSdatabase_final.csv
11387	CC1=CC2=C(C=C1)C=C(C=C2)C	[M+H]	128.6	Benzenoids	20190304JAP_CCSdatabase_final.csv
11396	CC1=CC2=C(C=C1)C=CC(=C2)C	[M+H]	129.5	Benzenoids	20190304JAP_CCSdatabase_final.csv
15304	CC1=CC2=C(C=C1)C=CC3=C2C=C(C=C3)C	[M*]	142.8	Benzenoids	20190304JAP_CCSdatabase_final.csv
15304	CC1=CC2=C(C=C1)C=CC3=C2C=C(C=C3)C	[M+H]	143.9	Benzenoids	20190304JAP_CCSdatabase_final.csv
2282158	CC1=CC2=C(C=C1)OC(=N2)C3=CC(=CC=C3)NC(=O)C4=C(C(=CC=C4)Cl)Cl	[M-H]	273.5	Organoheterocyclic compounds	20190304JAP_CCSdatabase_final.csv
	CC1=CC2=C(C=C1C)N(C=N2)[C@@H]3[C@@H]([C@@H]([C@H](O3)CO)OP(=O)([O-])O[C@H](C)CNC(=O)CC[C@@]4([C@H]([C@@H]5[C@]6([C@@]([C@@H](/C(=C(/C7=N/C(=C\C8=N/C(=C(\C4=N5)/C)/[C@H](C8(C)C)CCC(=O)N)/[C@H]([C@]7(C)CC(=O)N)CCC(=O)N)\C)/[N-]6)CCC(=O)N)(C)CC(=O)N)C)CC(=O)N)C)O.[C-]#N.[Co+3]	[M-H]	337.8	Organoheterocyclic compounds	20190304JAP_CCSdatabase_final.csv
	CC1=CC2=C(C=C1C)N(C=N2)[C@@H]3[C@@H]([C@@H]([C@H](O3)CO)OP(=O)([O-])O[C@H](C)CNC(=O)CC[C@@]4([C@H]([C@@H]5[C@]6([C@@]([C@@H](/C(=C(/C7=N/C(=C\C8=N/C(=C(\C4=N5)/C)/[C@H](C8(C)C)CCC(=O)N)/[C@H]([C@]7(C)CC(=O)N)CCC(=O)N)\C)/[N-]6)CCC(=O)N)(C)CC(=O)N)C)CC(=O)N)C)O.[C-]#N.[Co+3]	[M+H]	336.3	Organoheterocyclic compounds	20190304JAP_CCSdatabase_final.csv
493570	CC1=CC2=C(C=C1C)N(C3=NC(=O)NC(=O)C3=N2)C[C@@H]([C@@H]([C@@H](CO)O)O)O	[M-H]	187.3	Organoheterocyclic compounds	20190304JAP_CCSdatabase_final.csv
493570	CC1=CC2=C(C=C1C)N(C3=NC(=O)NC(=O)C3=N2)C[C@@H]([C@@H]([C@@H](CO)O)O)O	[M+H]	189.7	Organoheterocyclic compounds	20190304JAP_CCSdatabase_final.csv
2734019	CC1=CC2=C(C=C1C)N(C3=NC(=O)NC(=O)C3=N2)C[C@@H]([C@@H]([C@@H](COP(=O)([O-])OP(=O)([O-])OC[C@@H]4[C@H]([C@H]([C@@H](O4)N5C=NC6=C(N=CN=C65)N)O)O)O)O)O.[Na+].[Na+]	[M-H]	238.5	Organoheterocyclic compounds	20190304JAP_CCSdatabase_final.csv
2734019	CC1=CC2=C(C=C1C)N(C3=NC(=O)NC(=O)C3=N2)C[C@@H]([C@@H]([C@@H](COP(=O)([O-])OP(=O)([O-])OC[C@@H]4[C@H]([C@H]([C@@H](O4)N5C=NC6=C(N=CN=C65)N)O)O)O)O)O.[Na+].[Na+]	[M+H]	249.2	Organoheterocyclic compounds	20190304JAP_CCSdatabase_final.csv
89636	CC1=CC2=C(C=C1C)N(C3=NC(=O)NC(=O)C3=N2)C[C@@H]([C@@H]([C@@H](COP(=O)(O)[O-])O)O)O.[Na+]	[M-H]	200.1	Organoheterocyclic compounds	20190304JAP_CCSdatabase_final.csv
89636	CC1=CC2=C(C=C1C)N(C3=NC(=O)NC(=O)C3=N2)C[C@@H]([C@@H]([C@@H](COP(=O)(O)[O-])O)O)O.[Na+]	[M+H]	200.2	Organoheterocyclic compounds	20190304JAP_CCSdatabase_final.csv
506	CC1=CC2=C(C=C1C)N=C3C(=NC(=O)NC3=O)N2	[M-H]	155.6	Organoheterocyclic compounds	20190304JAP_CCSdatabase_final.csv
506	CC1=CC2=C(C=C1C)N=C3C(=NC(=O)NC3=O)N2	[M+H]	153.4	Organoheterocyclic compounds	20190304JAP_CCSdatabase_final.csv
675	CC1=CC2=C(C=C1C)N=CN2	[M-H]	130	Organoheterocyclic compounds	20190304JAP_CCSdatabase_final.csv
675	CC1=CC2=C(C=C1C)N=CN2	[M+H]	130.4	Organoheterocyclic compounds	20190304JAP_CCSdatabase_final.csv
7055	CC1=CC2=CC=CC=C2C=C1	[M*]	121.8	Benzenoids	20190304JAP_CCSdatabase_final.csv
7055	CC1=CC2=CC=CC=C2C=C1	[M+H]	123.1	Benzenoids	20190304JAP_CCSdatabase_final.csv
	CC1=CC2=CC3=CC=CC=C3C=C2C=C1	[M*]	135.7	Benzenoids	20190304JAP_CCSdatabase_final.csv
	CC1=CC2=CC3=CC=CC=C3C=C2C=C1	[M+H]	137	Benzenoids	20190304JAP_CCSdatabase_final.csv
69170	CC1=CC2=CC3=CC=CC=C3C=C2C=C1C	[M+H]	144.4	Benzenoids	20190304JAP_CCSdatabase_final.csv
92918	CC1=CN(C(=O)N=C1N)[C@H]2[C@@H]([C@@H]([C@H](O2)CO)O)O	[M-H]	159.9	Organic oxygen compounds	20190304JAP_CCSdatabase_final.csv
92918	CC1=CN(C(=O)N=C1N)[C@H]2[C@@H]([C@@H]([C@H](O2)CO)O)O	[M+H]	156.5	Organic oxygen compounds	20190304JAP_CCSdatabase_final.csv
5789	CC1=CN(C(=O)NC1=O)[C@H]2C[C@@H]([C@H](O2)CO)O	[M-H]	154.2	Organic oxygen compounds	20190304JAP_CCSdatabase_final.csv
153672	CC1=CN(C(=O)NC1=O)[C@H]2C[C@@H]([C@H](O2)COP(=O)([O-])[O-])O.[Na+].[Na+]	[M-H]	163.8	Organic oxygen compounds	20190304JAP_CCSdatabase_final.csv
153672	CC1=CN(C(=O)NC1=O)[C@H]2C[C@@H]([C@H](O2)COP(=O)([O-])[O-])O.[Na+].[Na+]	[M+H]	162.8	Organic oxygen compounds	20190304JAP_CCSdatabase_final.csv
71308773	CC1=CN(C(=O)NC1=O)[C@H]2C[C@@H]([C@H](O2)COP(=O)([O-])OP(=O)([O-])O[C@@H]3[C@@H]([C@H]([C@@H]([C@H](O3)CO)O)O)O)O.[Na+].[Na+]	[M-H]	209.5	Organic oxygen compounds	20190304JAP_CCSdatabase_final.csv
9700	CC1=CN(C(=O)NC1=O)[C@H]2C[C@@H]([C@H](O2)COP(=O)(O)O)O	[M-H]	163.1	Organic oxygen compounds	20190304JAP_CCSdatabase_final.csv
1135	CC1=CNC(=O)NC1=O	[M-H]	119.5	Organoheterocyclic compounds	20190304JAP_CCSdatabase_final.csv
1135	CC1=CNC(=O)NC1=O	[M+H]	122.1	Organoheterocyclic compounds	20190304JAP_CCSdatabase_final.csv
6723	CC1=NC=C(C(=C1O)C(=O)O)CO	[M-H]	130.9	Organoheterocyclic compounds	20190304JAP_CCSdatabase_final.csv
6723	CC1=NC=C(C(=C1O)C(=O)O)CO	[M+H]	136	Organoheterocyclic compounds	20190304JAP_CCSdatabase_final.csv
1050	CC1=NC=C(C(=C1O)C=O)CO	[M-H]	129.2	Organoheterocyclic compounds	20190304JAP_CCSdatabase_final.csv
1050	CC1=NC=C(C(=C1O)C=O)CO	[M+H]	131.3	Organoheterocyclic compounds	20190304JAP_CCSdatabase_final.csv
1051	CC1=NC=C(C(=C1O)C=O)COP(=O)(O)O	[M-H]	149.4	Organoheterocyclic compounds	20190304JAP_CCSdatabase_final.csv
1051	CC1=NC=C(C(=C1O)C=O)COP(=O)(O)O	[M-H]	150.1	Organoheterocyclic compounds	20190304JAP_CCSdatabase_final.csv
1051	CC1=NC=C(C(=C1O)C=O)COP(=O)(O)O	[M+H]	151.7	Organoheterocyclic compounds	20190304JAP_CCSdatabase_final.csv
1051	CC1=NC=C(C(=C1O)C=O)COP(=O)(O)O	[M+H]	152.4	Organoheterocyclic compounds	20190304JAP_CCSdatabase_final.csv
1052	CC1=NC=C(C(=C1O)CN)CO	[M-H]	136.4	Organoheterocyclic compounds	20190304JAP_CCSdatabase_final.csv
1052	CC1=NC=C(C(=C1O)CN)CO	[M+H]	134.4	Organoheterocyclic compounds	20190304JAP_CCSdatabase_final.csv
1054	CC1=NC=C(C(=C1O)CO)CO	[M-H]	134.7	Organoheterocyclic compounds	20190304JAP_CCSdatabase_final.csv
1054	CC1=NC=C(C(=C1O)CO)CO	[M+H]	134.5	Organoheterocyclic compounds	20190304JAP_CCSdatabase_final.csv
4173	CC1=NC=C(N1CCO)[N+](=O)[O-]	[M-H]	200.5	Lipids and lipid-like molecules	20190304JAP_CCSdatabase_final.csv
643	CC1C(NC(=O)N1)CCCCCC(=O)O	[M-H]	154.7	Lipids and lipid-like molecules	20190304JAP_CCSdatabase_final.csv
643	CC1C(NC(=O)N1)CCCCCC(=O)O	[M+H]	144.5	Lipids and lipid-like molecules	20190304JAP_CCSdatabase_final.csv
21577972	CC1C2=CC(=C(C=C2CC[NH2+]1)O)O	[M-H]	139.7	Organoheterocyclic compounds	20190304JAP_CCSdatabase_final.csv
21577972	CC1C2=CC(=C(C=C2CC[NH2+]1)O)O	[M+H]	142.9	Organoheterocyclic compounds	20190304JAP_CCSdatabase_final.csv
150923	CC1C2=CC=CC=C2NC1=O	[M+H]	130.8	Benzenoids	20190304JAP_CCSdatabase_final.csv
3014346	CCC(C(=O)[O-])O.[Na+]	[M-H]	120.5	Organic acids and derivatives	20190304JAP_CCSdatabase_final.csv
47	CCC(C)C(=O)C(=O)O	[M-H]	127.3	Organic acids and derivatives	20190304JAP_CCSdatabase_final.csv
14818979	CCC(C)C(C(=O)NC(CCCCN)C(=O)O)NC(=O)CNC(=O)C(C)NC(=O)C(CC1=CC=CC=C1)NC(=O)C(C(C)CC)NC(=O)C(CCSC)N	[M+H]	274.9	Organic acids and derivatives	20190304JAP_CCSdatabase_final.csv
38479	CCC(CC)NC1=C(C=C(C(=C1[N+](=O)[O-])C)C)[N+](=O)[O-]	[M-H]	166.9	Benzenoids	20190304JAP_CCSdatabase_final.csv
38479	CCC(CC)NC1=C(C=C(C(=C1[N+](=O)[O-])C)C)[N+](=O)[O-]	[M+H]	161.6	Benzenoids	20190304JAP_CCSdatabase_final.csv
65098	CCC[C@@H](C(=O)O)N	[M-H]	142.5	Organic acids and derivatives	20190304JAP_CCSdatabase_final.csv
65098	CCC[C@@H](C(=O)O)N	[M+H]	120.9	Organic acids and derivatives	20190304JAP_CCSdatabase_final.csv
53394040	CCC=CCC(C(C=CC=CC=CC=CC(CC=CCCC(=O)O)O)O)O	[M-H]	194.2	Lipids and lipid-like molecules	20190304JAP_CCSdatabase_final.csv
53394122	CCC=CCC(C=CC=CC=CC=CC(C(CC=CCCC(=O)O)O)O)O	[M-H]	198.2	Lipids and lipid-like molecules	20190304JAP_CCSdatabase_final.csv
53394130	CCC=CCC=CCC(C=CC=CC=CC(CC=CCCC(=O)O)O)O	[M-H]	192.8	Lipids and lipid-like molecules	20190304JAP_CCSdatabase_final.csv
3080584	CCC=CCC=CCC=CCC=CCCCCCCC(=O)O	[M-H]	186.7	Lipids and lipid-like molecules	20190304JAP_CCSdatabase_final.csv
3080584	CCC=CCC=CCC=CCC=CCCCCCCC(=O)O	[M+H]	177.8	Lipids and lipid-like molecules	20190304JAP_CCSdatabase_final.csv
4169	CCC1=CC=CC(=C1N(C(C)COC)C(=O)CCl)C	[M+H]	160.4	Benzenoids	20190304JAP_CCSdatabase_final.csv
1988	CCC1=CC=CC(=C1N(COCC)C(=O)CCl)C	[M+H]	173.5	Benzenoids	20190304JAP_CCSdatabase_final.csv
74563	CCCC(=O)C(=O)O	[M-H]	173.8	Organic acids and derivatives	20190304JAP_CCSdatabase_final.csv
21236	CCCC[C@@H](C(=O)O)N	[M-H]	132.2	Organic acids and derivatives	20190304JAP_CCSdatabase_final.csv
21236	CCCC[C@@H](C(=O)O)N	[M+H]	136.4	Organic acids and derivatives	20190304JAP_CCSdatabase_final.csv
8343	CCCCC(CC)COC(=O)C1=CC=CC=C1C(=O)OCC(CC)CCCC	[M+H]	212.2	Benzenoids	20190304JAP_CCSdatabase_final.csv
6441301	CCCCC/C=C/C/C=C/C/C=C/C/C=C/CCCC(=O)OC[C@H](COP(=O)(O)OCCN)OC(=O)CCC/C=C/C/C=C/C/C=C/C/C=C/CCCCC	[M-H]	277.3	Lipids and lipid-like molecules	20190304JAP_CCSdatabase_final.csv
5353364	CCCCC/C=C/C/C=C/CC1C(O1)C/C=C/CCCC(=O)O	[M-H]	184	Lipids and lipid-like molecules	20190304JAP_CCSdatabase_final.csv
5353269	CCCCC/C=C/CC1C(O1)C/C=C/C/C=C/CCCC(=O)O	[M-H]	184.4	Lipids and lipid-like molecules	20190304JAP_CCSdatabase_final.csv
444899	CCCCC/C=C\C/C=C\C/C=C\C/C=C\CCCC(=O)O	[M-H]	183	Lipids and lipid-like molecules	20190304JAP_CCSdatabase_final.csv
444899	CCCCC/C=C\C/C=C\C/C=C\C/C=C\CCCC(=O)O	[M-H]	181.6	Lipids and lipid-like molecules	20190304JAP_CCSdatabase_final.csv
5497181	CCCCC/C=C\C/C=C\C/C=C\C/C=C\CCCCCC(=O)O	[M-H]	190.3	Lipids and lipid-like molecules	20190304JAP_CCSdatabase_final.csv
5497181	CCCCC/C=C\C/C=C\C/C=C\C/C=C\CCCCCC(=O)O	[M+H]	188.2	Lipids and lipid-like molecules	20190304JAP_CCSdatabase_final.csv
5280733	CCCCC/C=C\C/C=C\C/C=C\C=C\[C@H](CCCC(=O)O)O	[M-H]	186.6	Lipids and lipid-like molecules	20190304JAP_CCSdatabase_final.csv
5280933	CCCCC/C=C\C/C=C\C/C=C\CCCCC(=O)O	[M-H]	174.5	Lipids and lipid-like molecules	20190304JAP_CCSdatabase_final.csv
5280581	CCCCC/C=C\C/C=C\C/C=C\CCCCCCC(=O)O	[M-H]	182	Lipids and lipid-like molecules	20190304JAP_CCSdatabase_final.csv
5280581	CCCCC/C=C\C/C=C\C/C=C\CCCCCCC(=O)O	[M-H]	182.6	Lipids and lipid-like molecules	20190304JAP_CCSdatabase_final.csv
5283154	CCCCC/C=C\C/C=C\C=C\[C@H](C/C=C\CCCC(=O)O)O	[M-H]	184.4	Lipids and lipid-like molecules	20190304JAP_CCSdatabase_final.csv
5280878	CCCCC/C=C\C/C=C\C=C\C=C\[C@H]([C@H](CCCC(=O)O)O)SC[C@@H](C(=O)NCC(=O)O)N	[M-H]	225.5	Lipids and lipid-like molecules	20190304JAP_CCSdatabase_final.csv
5280878	CCCCC/C=C\C/C=C\C=C\C=C\[C@H]([C@H](CCCC(=O)O)O)SC[C@@H](C(=O)NCC(=O)O)N	[M+H]	232.7	Lipids and lipid-like molecules	20190304JAP_CCSdatabase_final.csv
5280493	CCCCC/C=C\C/C=C\C=C\C=C\[C@H]([C@H](CCCC(=O)O)O)SC[C@@H](C(=O)NCC(=O)O)NC(=O)CC[C@@H](C(=O)O)N	[M-H]	245.2	Organic acids and derivatives	20190304JAP_CCSdatabase_final.csv
5280493	CCCCC/C=C\C/C=C\C=C\C=C\[C@H]([C@H](CCCC(=O)O)O)SC[C@@H](C(=O)NCC(=O)O)NC(=O)CC[C@@H](C(=O)O)N	[M+H]	255.6	Organic acids and derivatives	20190304JAP_CCSdatabase_final.csv
5280879	CCCCC/C=C\C/C=C\C=C\C=C\[C@H]([C@H](CCCC(=O)O)O)SC[C@@H](C(=O)O)N	[M-H]	213.2	Lipids and lipid-like molecules	20190304JAP_CCSdatabase_final.csv
5280879	CCCCC/C=C\C/C=C\C=C\C=C\[C@H]([C@H](CCCC(=O)O)O)SC[C@@H](C(=O)O)N	[M+H]	212	Lipids and lipid-like molecules	20190304JAP_CCSdatabase_final.csv
5280450	CCCCC/C=C\C/C=C\CCCCCCCC(=O)O	[M-H]	174.6	Lipids and lipid-like molecules	20190304JAP_CCSdatabase_final.csv
5280450	CCCCC/C=C\C/C=C\CCCCCCCC(=O)O	[M-H]	175.4	Lipids and lipid-like molecules	20190304JAP_CCSdatabase_final.csv
5284421	CCCCC/C=C\C/C=C\CCCCCCCC(=O)OC	[M-H]	182.6	Lipids and lipid-like molecules	20190304JAP_CCSdatabase_final.csv
5284421	CCCCC/C=C\C/C=C\CCCCCCCC(=O)OC	[M+H]	186	Lipids and lipid-like molecules	20190304JAP_CCSdatabase_final.csv
6439848	CCCCC/C=C\C/C=C\CCCCCCCCCC(=O)O	[M-H]	181.8	Lipids and lipid-like molecules	20190304JAP_CCSdatabase_final.csv
6439848	CCCCC/C=C\C/C=C\CCCCCCCCCC(=O)O	[M-H]	183.1	Lipids and lipid-like molecules	20190304JAP_CCSdatabase_final.csv
5283155	CCCCC/C=C\C[C@@H](/C=C/C=C\C/C=C\CCCC(=O)O)O	[M-H]	184.2	Lipids and lipid-like molecules	20190304JAP_CCSdatabase_final.csv
5280492	CCCCC/C=C\C[C@H](/C=C/C=C/C=C\[C@H](CCCC(=O)O)O)O	[M-H]	186.8	Lipids and lipid-like molecules	20190304JAP_CCSdatabase_final.csv
5283156	CCCCC/C=C\C[C@H](/C=C/C=C\C/C=C\CCCC(=O)O)O	[M-H]	183.5	Lipids and lipid-like molecules	20190304JAP_CCSdatabase_final.csv
5282944	CCCCC/C=C\C=C\C(CCCCCCCC(=O)O)O	[M-H]	180	Lipids and lipid-like molecules	20190304JAP_CCSdatabase_final.csv
5280890	CCCCC[C@@H](/C=C/[C@@H]1[C@H]([C@H](C[C@H](O1)O)O)C/C=C\CCCC(=O)O)O	[M-H]	193.8	Lipids and lipid-like molecules	20190304JAP_CCSdatabase_final.csv
448457	CCCCC[C@@H](/C=C/[C@@H]1[C@H]([C@H](CC1=O)O)C/C=C\CCCC(=O)O)O	[M-H]	189.4	Lipids and lipid-like molecules	20190304JAP_CCSdatabase_final.csv
5280363	CCCCC[C@@H](/C=C/[C@H]1[C@@H](C[C@@H]([C@@H]1C/C=C\CCCC(=O)O)O)O)O	[M-H]	194.1	Lipids and lipid-like molecules	20190304JAP_CCSdatabase_final.csv
5280888	CCCCC[C@@H](/C=C/[C@H]1[C@@H](C[C@@H]([C@@H]1CC(=O)CCCCC(=O)O)O)O)O	[M-H]	196	Lipids and lipid-like molecules	20190304JAP_CCSdatabase_final.csv
5282263	CCCCC[C@@H](/C=C/[C@H]1[C@@H](C[C@@H]([C@H]1C/C=C\CCCC(=O)O)O)O)O	[M-H]	196.6	Lipids and lipid-like molecules	20190304JAP_CCSdatabase_final.csv
5282410	CCCCC[C@@H](/C=C/[C@H]1[C@@H](C[C@H]2[C@@H]1C/C(=C/CCCC(=O)[O-])/O2)O)O.[Na+]	[M-H]	191.9	Lipids and lipid-like molecules	20190304JAP_CCSdatabase_final.csv
5282410	CCCCC[C@@H](/C=C/[C@H]1[C@@H](C[C@H]2[C@@H]1C/C(=C/CCCC(=O)[O-])/O2)O)O.[Na+]	[M+H]	199.8	Lipids and lipid-like molecules	20190304JAP_CCSdatabase_final.csv
5280886	CCCCC[C@@H](/C=C/[C@H]1[C@H](C[C@@H]([C@@H]1C/C=C\CCCC(=O)O)O)O)O	[M-H]	193.5	Lipids and lipid-like molecules	20190304JAP_CCSdatabase_final.csv
445049	CCCCC[C@@H](/C=C/[C@H]1[C@H]2C[C@@H]([C@@H]1C/C=C\CCCC(=O)O)OO2)O	[M-H]	190.2	Lipids and lipid-like molecules	20190304JAP_CCSdatabase_final.csv
5280883	CCCCC[C@@H](/C=C/[C@H]1[C@H]2C[C@@H]([C@@H]1C/C=C\CCCC(=O)O)OO2)OO	[M-H]	193.6	Lipids and lipid-like molecules	20190304JAP_CCSdatabase_final.csv
	CCCCC[C@@H](/C=C/[C@H]1CC2CC(C2)[C@@H]1C/C=C\CCCC(=O)O)O	[M-H]	200.4	Lipids and lipid-like molecules	20190304JAP_CCSdatabase_final.csv
5280914	CCCCC[C@@H](/C=C/C=C\C=C\C=C\[C@H]([C@H](CCCC(=O)O)O)O)O	[M-H]	193.3	Lipids and lipid-like molecules	20190304JAP_CCSdatabase_final.csv
5283046	CCCCC[C@H](/C=C/[C@H]1[C@@H](C[C@@H]([C@@H]1C/C=C\CCCC(=O)O)O)O)O	[M-H]	192.7	Lipids and lipid-like molecules	20190304JAP_CCSdatabase_final.csv
35022907	CCCCC[C@H](/C=C/[C@H]1[C@@H](C[C@@H]([C@H]1C/C=C\CCCC(=O)O)O)O)O	[M-H]	197.7	Lipids and lipid-like molecules	20190304JAP_CCSdatabase_final.csv
5282948	CCCCCC(/C=C/C=C/CCCCCCCC(=O)O)O	[M-H]	182.5	Lipids and lipid-like molecules	20190304JAP_CCSdatabase_final.csv
6446027	CCCCCC(=O)/C=C/C=C\CCCCCCCC(=O)O	[M-H]	179.8	Lipids and lipid-like molecules	20190304JAP_CCSdatabase_final.csv
6446027	CCCCCC(=O)/C=C/C=C\CCCCCCCC(=O)O	[M+H]	178	Lipids and lipid-like molecules	20190304JAP_CCSdatabase_final.csv
9546806	CCCCCC(=O)OC[C@H](COP(=O)(O)OCCN)OC(=O)CCCCC	[M-H]	201.8	Lipids and lipid-like molecules	20190304JAP_CCSdatabase_final.csv
445638	CCCCCC/C=C\CCCCCCCC(=O)O	[M-H]	167.3	Lipids and lipid-like molecules	20190304JAP_CCSdatabase_final.csv
445638	CCCCCC/C=C\CCCCCCCC(=O)O	[M-H]	167.8	Lipids and lipid-like molecules	20190304JAP_CCSdatabase_final.csv
9546809	CCCCCC/C=C\CCCCCCCC(=O)OC[C@H](COP(=O)(O)OCCN)OC(=O)CCCCCCC/C=C\CCCCCC	[M-H]	289.5	Lipids and lipid-like molecules	20190304JAP_CCSdatabase_final.csv
193923	CCCCCC=CC=CC(=O)CCCCCCCC(=O)O	[M-H]	180	Lipids and lipid-like molecules	20190304JAP_CCSdatabase_final.csv
193923	CCCCCC=CC=CC(=O)CCCCCCCC(=O)O	[M+H]	183.4	Lipids and lipid-like molecules	20190304JAP_CCSdatabase_final.csv
53394198	CCCCCC=CCC1C(CC(C1C=CC(CCCC(=O)O)O)O)O	[M-H]	194.3	Lipids and lipid-like molecules	20190304JAP_CCSdatabase_final.csv
5283205	CCCCCC1C(O1)C/C=C\C/C=C\C/C=C\CCCC(=O)O	[M-H]	187	Lipids and lipid-like molecules	20190304JAP_CCSdatabase_final.csv
5283205	CCCCCC1C(O1)C/C=C\C/C=C\C/C=C\CCCC(=O)O	[M+H]	181.3	Lipids and lipid-like molecules	20190304JAP_CCSdatabase_final.csv
78073	CCCCCCC[N+](CCCCCCC)(CCCCCCC)CCCCCCC.[Br-]	[M*]	233.9	Lipids and lipid-like molecules	20190304JAP_CCSdatabase_final.csv
	CCCCCCCC(=O)OC[C@H](COP(=O)(O)OCCN)OC(=O)CCCCCCC	[M-H]	213.4	Lipids and lipid-like molecules	20190304JAP_CCSdatabase_final.csv
637517	CCCCCCCC/C=C/CCCCCCCC(=O)O	[M-H]	175.9	Lipids and lipid-like molecules	20190304JAP_CCSdatabase_final.csv
5364680	CCCCCCCC/C=C/CCCCCCCC(=O)OCC(COP(=O)([O-])OCC[N+](C)(C)C)OC(=O)CCCCCCC/C=C/CCCCCCCC	[M+H]	293.3	Lipids and lipid-like molecules	20190304JAP_CCSdatabase_final.csv
445639	CCCCCCCC/C=C\CCCCCCCC(=O)O	[M-H]	175.6	Lipids and lipid-like molecules	20190304JAP_CCSdatabase_final.csv
445639	CCCCCCCC/C=C\CCCCCCCC(=O)O	[M-H]	176.2	Lipids and lipid-like molecules	20190304JAP_CCSdatabase_final.csv
46907933	CCCCCCCC/C=C\CCCCCCCC(=O)O[C@H](CC(=O)[O-])C[N+](C)(C)C	[M+H]	217.3	Lipids and lipid-like molecules	20190304JAP_CCSdatabase_final.csv
16081932	CCCCCCCC/C=C\CCCCCCCC(=O)OC[C@H](COP(=O)([O-])OCC[N+](C)(C)C)O	[M+H]	233.2	Lipids and lipid-like molecules	20190304JAP_CCSdatabase_final.csv
9546757	CCCCCCCC/C=C\CCCCCCCC(=O)OC[C@H](COP(=O)(O)OCCN)OC(=O)CCCCCCC/C=C\CCCCCCCC	[M-H]	274	Lipids and lipid-like molecules	20190304JAP_CCSdatabase_final.csv
9546757	CCCCCCCC/C=C\CCCCCCCC(=O)OC[C@H](COP(=O)(O)OCCN)OC(=O)CCCCCCC/C=C\CCCCCCCC	[M+H]	278.8	Lipids and lipid-like molecules	20190304JAP_CCSdatabase_final.csv
	CCCCCCCC/C=C\CCCCCCCC(=O)OC[C@H](COP(=O)(O)OCCN)OC(=O)CCCCCCC/C=C\CCCCCCCC	[M-H]	272.3	Lipids and lipid-like molecules	20190304JAP_CCSdatabase_final.csv
5283468	CCCCCCCC/C=C\CCCCCCCC(=O)OCC(CO)O	[M+H]	202.9	Lipids and lipid-like molecules	20190304JAP_CCSdatabase_final.csv
5282768	CCCCCCCC/C=C\CCCCCCCCCC(=O)O	[M-H]	184.1	Lipids and lipid-like molecules	20190304JAP_CCSdatabase_final.csv
5282768	CCCCCCCC/C=C\CCCCCCCCCC(=O)O	[M-H]	183.3	Lipids and lipid-like molecules	20190304JAP_CCSdatabase_final.csv
5281120	CCCCCCCC/C=C\CCCCCCCCCCCCCC(=O)O	[M-H]	197.3	Lipids and lipid-like molecules	20190304JAP_CCSdatabase_final.csv
2734117	CCCCCCCC[N+](CCCCCCCC)(CCCCCCCC)CCCCCCCC.[Br-]	[M*]	254.8	Lipids and lipid-like molecules	20190304JAP_CCSdatabase_final.csv
16129629	CCCCCCCCCC(=O)N[C@@H](CC1=CNC2=CC=CC=C21)C(=O)N[C@@H](CC(=O)N)C(=O)N[C@@H](CC(=O)O)C(=O)NC3C(OC(=O)[C@@H](NC(=O)[C@@H](NC(=O)[C@H](NC(=O)CNC(=O)[C@@H](NC(=O)[C@H](NC(=O)[C@@H](NC(=O)[C@@H](NC(=O)CNC3=O)CCCN)CC(=O)O)C)CC(=O)O)CO)C(C)CC(=O)O)CC(=O)C4=CC=CC=C4N)C	[M+H]	379.3	Organoheterocyclic compounds	20190304JAP_CCSdatabase_final.csv
9546803	CCCCCCCCCC(=O)OC[C@H](COP(=O)(O)OCCN)OC(=O)CCCCCCCCC	[M-H]	225.9	Lipids and lipid-like molecules	20190304JAP_CCSdatabase_final.csv
3014876	CCCCCCCCCC[N+](CCCCCCCCCC)(CCCCCCCCCC)CCCCCCCCCC.[Br-]	[M*]	290.5	Lipids and lipid-like molecules	20190304JAP_CCSdatabase_final.csv
5281125	CCCCCCCCCCC/C=C\CCCCC(=O)O	[M-H]	175.5	Lipids and lipid-like molecules	20190304JAP_CCSdatabase_final.csv
3893	CCCCCCCCCCCC(=O)O	[M-H]	154.2	Lipids and lipid-like molecules	20190304JAP_CCSdatabase_final.csv
168381	CCCCCCCCCCCC(=O)O[C@H](CC(=O)[O-])C[N+](C)(C)C	[M+H]	199.5	Lipids and lipid-like molecules	20190304JAP_CCSdatabase_final.csv
9546801	CCCCCCCCCCCC(=O)OC[C@H](COP(=O)(O)OCCN)OC(=O)CCCCCCCCCCC	[M-H]	238.5	Lipids and lipid-like molecules	20190304JAP_CCSdatabase_final.csv
3014871	CCCCCCCCCCCC[N+](CCCCCCCCCCCC)(CCCCCCCCCCCC)CCCCCCCCCCCC.[Br-]	[M*]	316.9	Lipids and lipid-like molecules	20190304JAP_CCSdatabase_final.csv
	CCCCCCCCCCCCC(=O)OC[C@H](COP(=O)([O-])OCC[N+](C)(C)C)O	[M+H]	217.7	Lipids and lipid-like molecules	20190304JAP_CCSdatabase_final.csv
5280570	CCCCCCCCCCCCC/C=C/[C@H]([C@H](CO[C@H]1[C@@H]([C@H]([C@@H]([C@H](O1)CO)O)O)O)N)O	[M-H]	214	Organic oxygen compounds	20190304JAP_CCSdatabase_final.csv
5280570	CCCCCCCCCCCCC/C=C/[C@H]([C@H](CO[C@H]1[C@@H]([C@H]([C@@H]([C@H](O1)CO)O)O)O)N)O	[M+H]	221	Organic oxygen compounds	20190304JAP_CCSdatabase_final.csv
460604	CCCCCCCCCCCCCC(=O)OC[C@H](COP(=O)([O-])OCC[N+](C)(C)C)O	[M+H]	220.8	Lipids and lipid-like molecules	20190304JAP_CCSdatabase_final.csv
9852308	CCCCCCCCCCCCCC(=O)OC[C@H](COP(=O)(O)OCCN)OC(=O)CCCCCCCCCCCCC	[M-H]	250.8	Lipids and lipid-like molecules	20190304JAP_CCSdatabase_final.csv
26197	CCCCCCCCCCCCCC(=O)OCC(COP(=O)([O-])OCC[N+](C)(C)C)OC(=O)CCCCCCCCCCCCC	[M+H]	188.4	Lipids and lipid-like molecules	20190304JAP_CCSdatabase_final.csv
13849	CCCCCCCCCCCCCCC(=O)O	[M-H]	165	Lipids and lipid-like molecules	20190304JAP_CCSdatabase_final.csv
13849	CCCCCCCCCCCCCCC(=O)O	[M-H]	165.1	Lipids and lipid-like molecules	20190304JAP_CCSdatabase_final.csv
9546807	CCCCCCCCCCCCCCC(=O)OC[C@H](COP(=O)(O)OCCN)OC(=O)CCCCCCCCCCCCCC	[M-H]	256.3	Lipids and lipid-like molecules	20190304JAP_CCSdatabase_final.csv
91486	CCCCCCCCCCCCCCC[C@H]([C@H](CO)N)O	[M+H]	188.9	Organic acids and derivatives	20190304JAP_CCSdatabase_final.csv
985	CCCCCCCCCCCCCCCC(=O)O	[M-H]	168.7	Lipids and lipid-like molecules	20190304JAP_CCSdatabase_final.csv
985	CCCCCCCCCCCCCCCC(=O)O	[M-H]	169	Lipids and lipid-like molecules	20190304JAP_CCSdatabase_final.csv
11953816	CCCCCCCCCCCCCCCC(=O)O[C@H](CC(=O)[O-])C[N+](C)(C)C	[M+H]	214.7	Lipids and lipid-like molecules	20190304JAP_CCSdatabase_final.csv
24778933	CCCCCCCCCCCCCCCC(=O)O[C@H](COC(=O)CCCCCCC/C=C\CCCCCCCC)COP(=O)([O-])OCC[N+](C)(C)C	[M+H]	287.9	Lipids and lipid-like molecules	20190304JAP_CCSdatabase_final.csv
363417	CCCCCCCCCCCCCCCC(=O)OC(CC(=O)O)C[N+](C)(C)C.[Cl-]	[M+H]	213.8	Lipids and lipid-like molecules	20190304JAP_CCSdatabase_final.csv
460602	CCCCCCCCCCCCCCCC(=O)OC[C@H](COP(=O)([O-])OCC[N+](C)(C)C)O	[M+H]	231.4	Lipids and lipid-like molecules	20190304JAP_CCSdatabase_final.csv
16759367	CCCCCCCCCCCCCCCC(=O)OC[C@H](COP(=O)([O-])OCC[N+](C)(C)C)OC(=O)C	[M+H]	239.7	Lipids and lipid-like molecules	20190304JAP_CCSdatabase_final.csv
5283496	CCCCCCCCCCCCCCCC(=O)OC[C@H](COP(=O)(O)OCCN)OC(=O)CCCCCCC/C=C\CCCCCCCC	[M-H]	267.5	Lipids and lipid-like molecules	20190304JAP_CCSdatabase_final.csv
445468	CCCCCCCCCCCCCCCC(=O)OC[C@H](COP(=O)(O)OCCN)OC(=O)CCCCCCCCCCCCCCC	[M-H]	262.5	Lipids and lipid-like molecules	20190304JAP_CCSdatabase_final.csv
65109	CCCCCCCCCCCCCCCC(=O)OCC(COP(=O)(O)OCCN)OC(=O)CCCCCCCCCCCCCCC	[M-H]	261.8	Lipids and lipid-like molecules	20190304JAP_CCSdatabase_final.csv
12073128	CCCCCCCCCCCCCCCC[N+](CCCCCCCCCCCCCCCC)(CCCCCCCCCCCCCCCC)CCCCCCCCCCCCCCCC.[Br-]	[M*]	353.8	Lipids and lipid-like molecules	20190304JAP_CCSdatabase_final.csv
44584335	CCCCCCCCCCCCCCCCC(=O)N[C@@H](CO)[C@@H](/C=C/CCCCCCCCCCCCC)O	[M-H]	235.6	Lipids and lipid-like molecules	20190304JAP_CCSdatabase_final.csv
44584335	CCCCCCCCCCCCCCCCC(=O)N[C@@H](CO)[C@@H](/C=C/CCCCCCCCCCCCC)O	[M+H]	260.5	Lipids and lipid-like molecules	20190304JAP_CCSdatabase_final.csv
10465	CCCCCCCCCCCCCCCCC(=O)O	[M-H]	164.1	Lipids and lipid-like molecules	20190304JAP_CCSdatabase_final.csv
10465	CCCCCCCCCCCCCCCCC(=O)O	[M+H]	189.6	Lipids and lipid-like molecules	20190304JAP_CCSdatabase_final.csv
10465	CCCCCCCCCCCCCCCCC(=O)O	[M-H]	172.8	Lipids and lipid-like molecules	20190304JAP_CCSdatabase_final.csv
10465	CCCCCCCCCCCCCCCCC(=O)O	[M-H]	173.1	Lipids and lipid-like molecules	20190304JAP_CCSdatabase_final.csv
46891874	CCCCCCCCCCCCCCCCC(=O)OC[C@H](COP(=O)([O-])OCC[NH3+])OC(=O)CCCCCCCCCCCCCCCC	[M-H]	268.6	Lipids and lipid-like molecules	20190304JAP_CCSdatabase_final.csv
5281	CCCCCCCCCCCCCCCCCC(=O)O	[M-H]	177.1	Lipids and lipid-like molecules	20190304JAP_CCSdatabase_final.csv
5281	CCCCCCCCCCCCCCCCCC(=O)O	[M-H]	177.3	Lipids and lipid-like molecules	20190304JAP_CCSdatabase_final.csv
6441487	CCCCCCCCCCCCCCCCCC(=O)OC[C@H](COP(=O)([O-])OCC[N+](C)(C)C)OC(=O)CCCCCCC/C=C\C/C=C\CCCCC	[M+H]	240.7	Lipids and lipid-like molecules	20190304JAP_CCSdatabase_final.csv
447078	CCCCCCCCCCCCCCCCCC(=O)OC[C@H](COP(=O)(O)OCCN)OC(=O)CCCCCCCCCCCCCCCCC	[M-H]	274.6	Lipids and lipid-like molecules	20190304JAP_CCSdatabase_final.csv
86556	CCCCCCCCCCCCCCCCCC(=O)OCC(COP(=O)([O-])OCC[N+](C)(C)C)O	[M+H]	238.8	Lipids and lipid-like molecules	20190304JAP_CCSdatabase_final.csv
271338	CCCCCCCCCCCCCCCCCC(CCCCCCCCCCCCCCCC)CCCCCCCCCCCCCCCC	[M-H]	244.1	Lipids and lipid-like molecules	20190304JAP_CCSdatabase_final.csv
271338	CCCCCCCCCCCCCCCCCC(CCCCCCCCCCCCCCCC)CCCCCCCCCCCCCCCC	[M+H]	241.4	Lipids and lipid-like molecules	20190304JAP_CCSdatabase_final.csv
3017419	CCCCCCCCCCCCCCCCCC[N+](CCCCCCCCCCCCCCCCCC)(CCCCCCCCCCCCCCCCCC)CCCCCCCCCCCCCCCCCC.[Br-]	[M*]	372.9	Lipids and lipid-like molecules	20190304JAP_CCSdatabase_final.csv
12591	CCCCCCCCCCCCCCCCCCC(=O)O	[M+H]	196.5	Lipids and lipid-like molecules	20190304JAP_CCSdatabase_final.csv
24779472	CCCCCCCCCCCCCCCCCCC(=O)OC[C@H](COP(=O)([O-])OCC[N+](C)(C)C)O	[M+H]	240.5	Lipids and lipid-like molecules	20190304JAP_CCSdatabase_final.csv
10467	CCCCCCCCCCCCCCCCCCCC(=O)O	[M-H]	185	Lipids and lipid-like molecules	20190304JAP_CCSdatabase_final.csv
10467	CCCCCCCCCCCCCCCCCCCC(=O)O	[M-H]	185.9	Lipids and lipid-like molecules	20190304JAP_CCSdatabase_final.csv
24779473	CCCCCCCCCCCCCCCCCCCC(=O)OC[C@H](COP(=O)([O-])OCC[N+](C)(C)C)O	[M+H]	247	Lipids and lipid-like molecules	20190304JAP_CCSdatabase_final.csv
13584	CCCCCCCCCCCCCCCCCCCCCC(=O)OC	[M-H]	155.6	Lipids and lipid-like molecules	20190304JAP_CCSdatabase_final.csv
17085	CCCCCCCCCCCCCCCCCCCCCCC(=O)O	[M-H]	196.7	Lipids and lipid-like molecules	20190304JAP_CCSdatabase_final.csv
11197	CCCCCCCCCCCCCCCCCCCCCCCC(=O)O	[M-H]	199.9	Lipids and lipid-like molecules	20190304JAP_CCSdatabase_final.csv
11197	CCCCCCCCCCCCCCCCCCCCCCCC(=O)O	[M-H]	200.9	Lipids and lipid-like molecules	20190304JAP_CCSdatabase_final.csv
2733532	CCCCCCCCCCCCCCCCCCOC[C@H](COP(=O)([O-])OCC[N+](C)(C)C)O	[M+H]	235.5	Lipids and lipid-like molecules	20190304JAP_CCSdatabase_final.csv
2733535	CCCCCCCCCCCCCCCCCCOC[C@H](COP(=O)([O-])OCC[N+](C)(C)C)OC(=O)C	[M+H]	247.5	Lipids and lipid-like molecules	20190304JAP_CCSdatabase_final.csv
108156	CCCCCCCCCCCCCCCCOC[C@H](COP(=O)([O-])OCC[N+](C)(C)C)OC(=O)C	[M-H]	230.8	Lipids and lipid-like molecules	20190304JAP_CCSdatabase_final.csv
108156	CCCCCCCCCCCCCCCCOC[C@H](COP(=O)([O-])OCC[N+](C)(C)C)OC(=O)C	[M+H]	239.3	Lipids and lipid-like molecules	20190304JAP_CCSdatabase_final.csv
	CCCCCCCCCCCCCCCCOC[C@H](COP(=O)([O-])OCC[N+](C)(C)C)OC(=O)C	[M+H]	234.8	Lipids and lipid-like molecules	20190304JAP_CCSdatabase_final.csv
97536	CCCCCCSC[C@@H](C(=O)NCC(=O)O)NC(=O)CC[C@@H](C(=O)O)N	[M-H]	188.9	Organic acids and derivatives	20190304JAP_CCSdatabase_final.csv
97536	CCCCCCSC[C@@H](C(=O)NCC(=O)O)NC(=O)CC[C@@H](C(=O)O)N	[M+H]	200.6	Organic acids and derivatives	20190304JAP_CCSdatabase_final.csv
14842790	CCCCN(CCCC)CCCC.CCCCN(CCCC)CCCC.CCCCN(CCCC)CCCC.CCCCN(CCCC)CCCC.OP(=O)(O)OP(=O)(O)O	[M+H]	150.4	Organic acids and derivatives	20190304JAP_CCSdatabase_final.csv
91644	CCCOCCN(C1=C(C=CC=C1CC)CC)C(=O)CCl	[M-H]	149	Organic acids and derivatives	20190304JAP_CCSdatabase_final.csv
91644	CCCOCCN(C1=C(C=CC=C1CC)CC)C(=O)CCl	[M+H]	158.6	Organic acids and derivatives	20190304JAP_CCSdatabase_final.csv
2256	CCNC1=NC(=NC(=N1)Cl)NC(C)C	[M+H]	149.8	Organic acids and derivatives	20190304JAP_CCSdatabase_final.csv
13450	CCNC1=NC(=NC(=N1)SC)NC(C)(C)C	[M+H]	160.2	Organoheterocyclic compounds	20190304JAP_CCSdatabase_final.csv
75318	CCOC(=O)C1=CC=CC=C1C(=O)O	[M-H]	147.7	Benzenoids	20190304JAP_CCSdatabase_final.csv
108965	CCOC(=O)CC1=CC(=C(C=C1)O)OC	[M-H]	140.3	Benzenoids	20190304JAP_CCSdatabase_final.csv
13067	CCOC(=O)CC1=CNC2=CC=CC=C21	[M-H]	145.8	Organoheterocyclic compounds	20190304JAP_CCSdatabase_final.csv
13067	CCOC(=O)CC1=CNC2=CC=CC=C21	[M+H]	145.4	Organoheterocyclic compounds	20190304JAP_CCSdatabase_final.csv
118412	CCOC(=O)CN(C)C	[M+H]	127.9	Organic acids and derivatives	20190304JAP_CCSdatabase_final.csv
16219246	CN(C)C(=NCCC[C@@H](C(=O)O)N)N.Cl.Cl	[M+H]	144.4	Organic acids and derivatives	20190304JAP_CCSdatabase_final.csv
3120	CN(C)C(=O)NC1=CC(=C(C=C1)Cl)Cl	[M-H]	149.4	Benzenoids	20190304JAP_CCSdatabase_final.csv
3120	CN(C)C(=O)NC1=CC(=C(C=C1)Cl)Cl	[M+H]	152.3	Benzenoids	20190304JAP_CCSdatabase_final.csv
16562	CN(C)C(=O)NC1=CC=CC(=C1)C(F)(F)F	[M-H]	147.8	Benzenoids	20190304JAP_CCSdatabase_final.csv
16562	CN(C)C(=O)NC1=CC=CC(=C1)C(F)(F)F	[M+H]	151.2	Benzenoids	20190304JAP_CCSdatabase_final.csv
673	CN(C)CC(=O)O	[M+H]	123.1	Organic acids and derivatives	20190304JAP_CCSdatabase_final.csv
24802058	CN(CC(=O)O)/C(=N/P(=O)([O-])[O-])/N.O.O.O.O.[Na+].[Na+]	[M+H]	144.8	Organic acids and derivatives	20190304JAP_CCSdatabase_final.csv
586	CN(CC(=O)O)C(=N)N	[M+H]	126	Organic acids and derivatives	20190304JAP_CCSdatabase_final.csv
	CN(CC(=O)O)C(=NP(=O)([O-])[O-])N.O.[Na+].[Na+]	[M+H]	144.8	Organic acids and derivatives	20190304JAP_CCSdatabase_final.csv
439377	CN[C@@H](CCC(=O)O)C(=O)O	[M-H]	124.5	Organic acids and derivatives	20190304JAP_CCSdatabase_final.csv
439377	CN[C@@H](CCC(=O)O)C(=O)O	[M+H]	132.6	Organic acids and derivatives	20190304JAP_CCSdatabase_final.csv
22880	CN[C@H](CC(=O)O)C(=O)O	[M-H]	124.5	Organic acids and derivatives	20190304JAP_CCSdatabase_final.csv
22880	CN[C@H](CC(=O)O)C(=O)O	[M+H]	130.1	Organic acids and derivatives	20190304JAP_CCSdatabase_final.csv
444412	CN1[C@H](CNC2=C1C(=O)N=C(N2)N)CNC3=CC=C(C=C3)C(=O)N[C@@H](CCC(=O)O)C(=O)O	[M-H]	199.8	Organoheterocyclic compounds	20190304JAP_CCSdatabase_final.csv
444412	CN1[C@H](CNC2=C1C(=O)N=C(N2)N)CNC3=CC=C(C=C3)C(=O)N[C@@H](CCC(=O)O)C(=O)O	[M+H]	197.3	Organoheterocyclic compounds	20190304JAP_CCSdatabase_final.csv
91763	CN1C(=C(C(=N1)Cl)C(=O)OC)S(=O)(=O)NC(=O)NC2=NC(=CC(=N2)OC)OC	[M-H]	194.7	Organoheterocyclic compounds	20190304JAP_CCSdatabase_final.csv
91763	CN1C(=C(C(=N1)Cl)C(=O)OC)S(=O)(=O)NC(=O)NC2=NC(=CC(=N2)OC)OC	[M+H]	195.2	Organoheterocyclic compounds	20190304JAP_CCSdatabase_final.csv
39965	CN1C(=NC(=O)N(C1=O)C2CCCCC2)N(C)C	[M+H]	162.1	Organoheterocyclic compounds	20190304JAP_CCSdatabase_final.csv
96373	CN1C(=O)C2=C(N=C1N)N(C=N2)[C@H]3[C@@H]([C@@H]([C@H](O3)CO)O)O	[M-H]	166.4	Organoheterocyclic compounds	20190304JAP_CCSdatabase_final.csv
96373	CN1C(=O)C2=C(N=C1N)N(C=N2)[C@H]3[C@@H]([C@@H]([C@H](O3)CO)O)O	[M+H]	167.7	Organoheterocyclic compounds	20190304JAP_CCSdatabase_final.csv
40114	CN1C(CNC2=C1C(=O)N=C(N2)N)CNC3=CC=C(C=C3)C(=O)NC(CCC(=O)[O-])C(=O)[O-].[Na+].[Na+]	[M-H]	197.8	Organoheterocyclic compounds	20190304JAP_CCSdatabase_final.csv
40114	CN1C(CNC2=C1C(=O)N=C(N2)N)CNC3=CC=C(C=C3)C(=O)NC(CCC(=O)[O-])C(=O)[O-].[Na+].[Na+]	[M+H]	194.7	Organoheterocyclic compounds	20190304JAP_CCSdatabase_final.csv
	CN1C=C(N=C1)C[C@@H](C(=O)O)N	[M+H]	133.6	Organic acids and derivatives	20190304JAP_CCSdatabase_final.csv
16219661	CN1C=C(N=C1)CCN.Cl	[M+H]	121.8	Organic acids and derivatives	20190304JAP_CCSdatabase_final.csv
1673	CN1C=NC(=C2C1=NC=N2)N	[M+H]	126.5	Organoheterocyclic compounds	20190304JAP_CCSdatabase_final.csv
64969	CN1C=NC=C1C[C@@H](C(=O)O)N	[M-H]	141.1	Organic acids and derivatives	20190304JAP_CCSdatabase_final.csv
64969	CN1C=NC=C1C[C@@H](C(=O)O)N	[M+H]	135.7	Organic acids and derivatives	20190304JAP_CCSdatabase_final.csv
6362	CN1C=NC=C1C[C@@H](C(=O)O)NC(=O)CCN	[M-H]	154.9	Organic acids and derivatives	20190304JAP_CCSdatabase_final.csv
6362	CN1C=NC=C1C[C@@H](C(=O)O)NC(=O)CCN	[M+H]	154	Organic acids and derivatives	20190304JAP_CCSdatabase_final.csv
69520	CN1C=NC=C1CCN	[M+H]	123.8	Organic acids and derivatives	20190304JAP_CCSdatabase_final.csv
27476	CN1C=NC2=C(C1=N)N=CN2[C@H]3[C@@H]([C@@H]([C@H](O3)CO)O)O	[M-H]	162.9	Organoheterocyclic compounds	20190304JAP_CCSdatabase_final.csv
27476	CN1C=NC2=C(C1=N)N=CN2[C@H]3[C@@H]([C@@H]([C@H](O3)CO)O)O	[M+H]	160	Organoheterocyclic compounds	20190304JAP_CCSdatabase_final.csv
27476	CN1C=NC2=C(C1=N)N=CN2[C@H]3[C@@H]([C@@H]([C@H](O3)CO)O)O	[M+H]	164.9	Organoheterocyclic compounds	20190304JAP_CCSdatabase_final.csv
135398646	CN1C=NC2=C(C1=N)NC=N2	[M-H]	130.5	Organoheterocyclic compounds	20190304JAP_CCSdatabase_final.csv
135398646	CN1C=NC2=C(C1=N)NC=N2	[M+H]	127.5	Organoheterocyclic compounds	20190304JAP_CCSdatabase_final.csv
4687	CN1C=NC2=C1C(=O)N(C(=O)N2)C	[M+H]	134.5	Organoheterocyclic compounds	20190304JAP_CCSdatabase_final.csv
4687	CN1C=NC2=C1C(=O)N(C(=O)N2)C	[M+H]	139	Organoheterocyclic compounds	20190304JAP_CCSdatabase_final.csv
2519	CN1C=NC2=C1C(=O)N(C(=O)N2C)C	[M+H]	140.6	Organoheterocyclic compounds	20190304JAP_CCSdatabase_final.csv
11361	CN1C=NC2=C1C(=O)N=C(N2)N	[M-H]	136.1	Organoheterocyclic compounds	20190304JAP_CCSdatabase_final.csv
11361	CN1C=NC2=C1C(=O)N=C(N2)N	[M+H]	133.4	Organoheterocyclic compounds	20190304JAP_CCSdatabase_final.csv
5429	CN1C=NC2=C1C(=O)NC(=O)N2C	[M+H]	131.1	Organoheterocyclic compounds	20190304JAP_CCSdatabase_final.csv
5429	CN1C=NC2=C1C(=O)NC(=O)N2C	[M+H]	137.1	Organoheterocyclic compounds	20190304JAP_CCSdatabase_final.csv
2153	CN1C2=C(C(=O)N(C1=O)C)NC=N2	[M-H]	133.6	Organoheterocyclic compounds	20190304JAP_CCSdatabase_final.csv
2153	CN1C2=C(C(=O)N(C1=O)C)NC=N2	[M+H]	140.9	Organoheterocyclic compounds	20190304JAP_CCSdatabase_final.csv
588	CN1CC(=O)N=C1N	[M-H]	119.1	Organic acids and derivatives	20190304JAP_CCSdatabase_final.csv
588	CN1CC(=O)N=C1N	[M-H]	119.8	Organic acids and derivatives	20190304JAP_CCSdatabase_final.csv
588	CN1CC(=O)N=C1N	[M+H]	123.3	Organic acids and derivatives	20190304JAP_CCSdatabase_final.csv
588	CN1CC(=O)N=C1N	[M+H]	123.4	Organic acids and derivatives	20190304JAP_CCSdatabase_final.csv
5816	CNC[C@@H](C1=CC(=C(C=C1)O)O)O	[M-H]	140.3	Benzenoids	20190304JAP_CCSdatabase_final.csv
6088	CNCCC1=CNC2=CC=CC=C21	[M+H]	142.8	Organoheterocyclic compounds	20190304JAP_CCSdatabase_final.csv
5770	CO[C@H]1[C@@H](C[C@@H]2CN3CCC4=C([C@H]3C[C@@H]2[C@@H]1C(=O)OC)NC5=C4C=CC(=C5)OC)OC(=O)C6=CC(=C(C(=C6)OC)OC)OC	[M+H]	250.8	Organoheterocyclic compounds	20190304JAP_CCSdatabase_final.csv
134601	COC(=O)[C@H](CC1=CC=CC=C1)NC(=O)[C@H](CC(=O)O)N	[M-H]	126.6	Organic acids and derivatives	20190304JAP_CCSdatabase_final.csv
134601	COC(=O)[C@H](CC1=CC=CC=C1)NC(=O)[C@H](CC(=O)O)N	[M+H]	127.4	Organic acids and derivatives	20190304JAP_CCSdatabase_final.csv
161276	COC(=O)C1=CO[C@H]([C@@H]([C@@H]1CC=O)C=C)O[C@H]2[C@@H]([C@H]([C@@H]([C@H](O2)CO)O)O)O	[M-H]	190.9	Lipids and lipid-like molecules	20190304JAP_CCSdatabase_final.csv
6429511	COC(=O)CC=C(C(=O)OC)C(=O)OC	[M-H]	131.9	Organic acids and derivatives	20190304JAP_CCSdatabase_final.csv
6429511	COC(=O)CC=C(C(=O)OC)C(=O)OC	[M+H]	151.2	Organic acids and derivatives	20190304JAP_CCSdatabase_final.csv
74706	COC(=O)CC1=CNC2=CC=CC=C21	[M-H]	141.4	Organoheterocyclic compounds	20190304JAP_CCSdatabase_final.csv
74706	COC(=O)CC1=CNC2=CC=CC=C21	[M+H]	138.7	Organoheterocyclic compounds	20190304JAP_CCSdatabase_final.csv
25623	COC(=O)CCC[NH3+].[Cl-]	[M+H]	124.7	Organic acids and derivatives	20190304JAP_CCSdatabase_final.csv
72281	COC1=C(C=C(C=C1)[C@@H]2CC(=O)C3=C(C=C(C=C3O2)O)O)O	[M-H]	177.9	Organoheterocyclic compounds	20190304JAP_CCSdatabase_final.csv
72281	COC1=C(C=C(C=C1)[C@@H]2CC(=O)C3=C(C=C(C=C3O2)O)O)O	[M+H]	175.4	Organoheterocyclic compounds	20190304JAP_CCSdatabase_final.csv
7127	COC1=C(C=C(C=C1)CC=C)OC	[M-H]	133.2	Benzenoids	20190304JAP_CCSdatabase_final.csv
7127	COC1=C(C=C(C=C1)CC=C)OC	[M+H]	138.1	Benzenoids	20190304JAP_CCSdatabase_final.csv
445858	COC1=C(C=CC(=C1)/C=C/C(=O)O)O	[M-H]	140.1	Benzenoids	20190304JAP_CCSdatabase_final.csv
1245	COC1=C(C=CC(=C1)C(C(=O)O)O)O	[M-H]	130.6	Benzenoids	20190304JAP_CCSdatabase_final.csv
5281654	COC1=C(C=CC(=C1)C2=C(C(=O)C3=C(C=C(C=C3O2)O)O)O)O	[M-H]	174	Benzenoids	20190304JAP_CCSdatabase_final.csv
5281654	COC1=C(C=CC(=C1)C2=C(C(=O)C3=C(C=C(C=C3O2)O)O)O)O	[M+H]	171.9	Benzenoids	20190304JAP_CCSdatabase_final.csv
1738	COC1=C(C=CC(=C1)CC(=O)O)O	[M-H]	136.3	Benzenoids	20190304JAP_CCSdatabase_final.csv
1670	COC1=C(C=CC(=C1)CC(C(=O)O)N)O	[M-H]	148.2	Organic acids and derivatives	20190304JAP_CCSdatabase_final.csv
1670	COC1=C(C=CC(=C1)CC(C(=O)O)N)O	[M+H]	153.4	Organic acids and derivatives	20190304JAP_CCSdatabase_final.csv
1669	COC1=C(C=CC(=C1)CCN)O	[M+H]	146.9	Benzenoids	20190304JAP_CCSdatabase_final.csv
5281804	COC1=CC(=C2C(=C1)OC=C(C2=O)C3=CC=C(C=C3)O)O	[M-H]	174.6	Organoheterocyclic compounds	20190304JAP_CCSdatabase_final.csv
5281804	COC1=CC(=C2C(=C1)OC=C(C2=O)C3=CC=C(C=C3)O)O	[M+H]	165.2	Organoheterocyclic compounds	20190304JAP_CCSdatabase_final.csv
4101463	COC1=CC(=C2C(=O)CC(OC2=C1)C3=CC=CC=C3)O	[M-H]	168.2	Organoheterocyclic compounds	20190304JAP_CCSdatabase_final.csv
4101463	COC1=CC(=C2C(=O)CC(OC2=C1)C3=CC=CC=C3)O	[M+H]	163.2	Organoheterocyclic compounds	20190304JAP_CCSdatabase_final.csv
159287	COC1=CC(=CC(=C1O)OC)C2=[O+]C3=CC(=CC(=C3C=C2O)O)O	[M*]	177.4	Benzenoids	20190304JAP_CCSdatabase_final.csv
5379265	COC1=CC(=CC(=C1OC)OC)C2=CC(=O)C3=C(C=C(C=C3O2)O)O	[M-H]	191	Benzenoids	20190304JAP_CCSdatabase_final.csv
5379265	COC1=CC(=CC(=C1OC)OC)C2=CC(=O)C3=C(C=C(C=C3O2)O)O	[M+H]	184.4	Benzenoids	20190304JAP_CCSdatabase_final.csv
4276	COC1=CC(=CC2=C1OCO2)CC=C	[M-H]	144.2	Benzenoids	20190304JAP_CCSdatabase_final.csv
4276	COC1=CC(=CC2=C1OCO2)CC=C	[M+H]	140.8	Benzenoids	20190304JAP_CCSdatabase_final.csv
160921	COC1=CC=C(C=C1)C2=CC(=O)C3=C(C(=C(C(=C3O2)OC)O)OC)O	[M-H]	131	Benzenoids	20190304JAP_CCSdatabase_final.csv
5280442	COC1=CC=C(C=C1)C2=CC(=O)C3=C(C=C(C=C3O2)O)O	[M-H]	172.3	Benzenoids	20190304JAP_CCSdatabase_final.csv
5280442	COC1=CC=C(C=C1)C2=CC(=O)C3=C(C=C(C=C3O2)O)O	[M+H]	166	Benzenoids	20190304JAP_CCSdatabase_final.csv
68077	COC1=CC=C(C=C1)C2=CC(=O)C3=C(O2)C(=C(C(=C3OC)OC)OC)OC	[M+H]	186.7	Benzenoids	20190304JAP_CCSdatabase_final.csv
5280378	COC1=CC=C(C=C1)C2=COC3=C(C2=O)C=CC(=C3)O	[M-H]	168.5	Organoheterocyclic compounds	20190304JAP_CCSdatabase_final.csv
5280373	COC1=CC=C(C=C1)C2=COC3=CC(=CC(=C3C2=O)O)O	[M-H]	169.8	Organoheterocyclic compounds	20190304JAP_CCSdatabase_final.csv
98867	COC1=CC=CC(=C1[N+](=O)[O-])C=O	[M-H]	149.4	Benzenoids	20190304JAP_CCSdatabase_final.csv
81690	COC1=CC=CC=C1OCC(CO)(CO)CO	[M-H]	184.3	Benzenoids	20190304JAP_CCSdatabase_final.csv
81690	COC1=CC=CC=C1OCC(CO)(CO)CO	[M+H]	183.2	Benzenoids	20190304JAP_CCSdatabase_final.csv
5323	COC1=NC(=NC(=C1)NS(=O)(=O)C2=CC=C(C=C2)N)OC	[M-H]	171.3	Organoheterocyclic compounds	20190304JAP_CCSdatabase_final.csv
5323	COC1=NC(=NC(=C1)NS(=O)(=O)C2=CC=C(C=C2)N)OC	[M+H]	165.8	Organoheterocyclic compounds	20190304JAP_CCSdatabase_final.csv
136772	COP1(=NP(=NP(=N1)(OC)OC)(OC)OC)OC	[M+H]	153.4	Organoheterocyclic compounds	20190304JAP_CCSdatabase_final.csv
136772	COP1(=NP(=NP(=N1)(OC)OC)(OC)OC)OC	[M+H]	153.5	Organoheterocyclic compounds	20190304JAP_CCSdatabase_final.csv
53597	CP(=O)(CCC(C(=O)[O-])N)O.[NH4+]	[M-H]	135.4	Organic acids and derivatives	20190304JAP_CCSdatabase_final.csv
53597	CP(=O)(CCC(C(=O)[O-])N)O.[NH4+]	[M+H]	139.3	Organic acids and derivatives	20190304JAP_CCSdatabase_final.csv
89034	CS(=N)(=O)CC[C@@H](C(=O)O)N	[M-H]	136.4	Organic acids and derivatives	20190304JAP_CCSdatabase_final.csv
89034	CS(=N)(=O)CC[C@@H](C(=O)O)N	[M+H]	137	Organic acids and derivatives	20190304JAP_CCSdatabase_final.csv
439176	CSC[C@@H]1[C@H]([C@H]([C@@H](O1)N2C=NC3=C(N=CN=C32)N)O)O	[M-H]	168.3	Organoheterocyclic compounds	20190304JAP_CCSdatabase_final.csv
439176	CSC[C@@H]1[C@H]([C@H]([C@@H](O1)N2C=NC3=C(N=CN=C32)N)O)O	[M+H]	162	Organoheterocyclic compounds	20190304JAP_CCSdatabase_final.csv
439176	CSC[C@@H]1[C@H]([C@H]([C@@H](O1)N2C=NC3=C(N=CN=C32)N)O)O	[M+H]	171	Organoheterocyclic compounds	20190304JAP_CCSdatabase_final.csv
5778	CSC1=NC=NC2=C1NC=N2	[M-H]	128	Organoheterocyclic compounds	20190304JAP_CCSdatabase_final.csv
5778	CSC1=NC=NC2=C1NC=N2	[M+H]	130	Organoheterocyclic compounds	20190304JAP_CCSdatabase_final.csv
6137	CSCC[C@@H](C(=O)O)N	[M-H]	140.5	Organic acids and derivatives	20190304JAP_CCSdatabase_final.csv
6137	CSCC[C@@H](C(=O)O)N	[M+H]	132.9	Organic acids and derivatives	20190304JAP_CCSdatabase_final.csv
6137	CSCC[C@@H](C(=O)O)N	[M+H]	133.6	Organic acids and derivatives	20190304JAP_CCSdatabase_final.csv
439750	CSCC[C@@H](C(=O)O)NC=O	[M-H]	136.3	Organic acids and derivatives	20190304JAP_CCSdatabase_final.csv
107344	CSCCC(C(=O)[O-])O.CSCCC(C(=O)[O-])O.[Ca+2]	[M-H]	167.3	Organic acids and derivatives	20190304JAP_CCSdatabase_final.csv
	C(C(=O)O)OC1=NC(=C(C(=C1Cl)N)Cl)F	[M+H]+	140.69	Organoheterocyclic compounds	ac7b00741_si_001.csv
	C/C(=N\C#N)/N(C)CC1=CN=C(C=C1)Cl	[M+H]+	150.24	Organoheterocyclic compounds	ac7b00741_si_001.csv
	C/N=C(\CSP(=O)(OC)OC)/O	[M+H]+	134.62	Organic acids and derivatives	ac7b00741_si_001.csv
	C[C@@]1([C@H]2[C@@H]([C@H]3[C@@H](C(=C(C(=O)[C@]3(C(=C2C(=O)C4=C1C=CC=C4O)O)O)C(=O)N)O)N(C)C)O)O	[M+H]+	202.3	Organoheterocyclic compounds	ac7b00741_si_001.csv
	C[C@@]1([C@H]2C[C@H]3[C@@H](C(=C(C(=O)[C@]3(C(=C2C(=O)C4=C1C=CC=C4O)O)O)C(=O)N)O)N(C)C)O	[M+H]+	197.3	Organoheterocyclic compounds	ac7b00741_si_001.csv
	C[C@@]1(C(=O)N(C(=N1)SC)NC2=CC=CC=C2)C3=CC=CC=C3	[M+H]+	171.15	Organoheterocyclic compounds	ac7b00741_si_001.csv
	C[C@@]12CCC[C@@]([C@H]1CC[C@]34[C@H]2CC[C@](C3)(C(=C)C4)O)(C)C(=O)O	[M+H]+	173.38	Lipids and lipid-like molecules	ac7b00741_si_001.csv
	C[C@@]12CCC[C@@]([C@H]1CC[C@]34[C@H]2CC[C@](C3)(C(=C)C4)O[C@H]5[C@@H]([C@H]([C@@H]([C@H](O5)CO)O)O)O)(C)C(=O)O[C@H]6[C@@H]([C@H]([C@@H]([C@H](O6)CO)O)O)O	[M+H]+	241.31	Organic oxygen compounds	ac7b00741_si_001.csv
	C[C@@]12CCC[C@@]([C@H]1CC[C@]34[C@H]2CC[C@](C3)(C(=C)C4)O[C@H]5[C@@H]([C@H]([C@@H]([C@H](O5)CO)O)O)O[C@H]6[C@@H]([C@H]([C@@H]([C@H](O6)CO)O)O)O)(C)C(=O)O	[M+H]+	235.78	Organic oxygen compounds	ac7b00741_si_001.csv
	C[C@@]12CCC[C@@]([C@H]1CC[C@]34[C@H]2CC[C@](C3)(C(=C)C4)O[C@H]5[C@@H]([C@H]([C@@H]([C@H](O5)CO)O)O)O[C@H]6[C@@H]([C@H]([C@@H]([C@H](O6)CO)O)O)O)(C)C(=O)O[C@H]7[C@@H]([C@H]([C@@H]([C@H](O7)CO)O)O)O	[M+H]+	269.64	Organic oxygen compounds	ac7b00741_si_001.csv
	C[C@@]12CCC[C@@]([C@H]1CC[C@]34[C@H]2CC[C@](C3)(C(=C)C4)O[C@H]5[C@@H]([C@H]([C@@H]([C@H](O5)CO)O)O)O[C@H]6[C@@H]([C@H]([C@@H]([C@H](O6)CO)O)O)O)(C)C(=O)O[C@H]7[C@@H]([C@H]([C@@H]([C@H](O7)CO)O)O)O[C@H]8[C@@H]([C@H]([C@@H]([C@H](O8)CO)O)O)O	[M+H]+	289.2	Organic oxygen compounds	ac7b00741_si_001.csv
	C[C@@]12CCC[C@@]([C@H]1CC[C@]34[C@H]2CC[C@](C3)(C(=C)C4)O[C@H]5[C@@H]([C@H]([C@@H]([C@H](O5)CO)O)O[C@H]6[C@@H]([C@H]([C@@H]([C@H](O6)CO)O)O)O)O[C@H]7[C@@H]([C@H]([C@@H]([C@H](O7)CO)O)O)O)(C)C(=O)O	[M+H]+	261.19	Organic oxygen compounds	ac7b00741_si_001.csv
	C[C@@H]([C@@H](c1ccc(cc1)O)O)NCCc2ccc(cc2)O	[M+H]+	165.8	Benzenoids	ac7b00741_si_001.csv
	C[C@@H](c1ccc2cc(ccc2c1)OC)C(=O)O	[M+H]+	147.1	Benzenoids	ac7b00741_si_001.csv
	C[C@@H]1[C@H]2[C@@H]([C@H]3[C@@H](C(=C(C(=O)[C@]3(C(=C2C(=O)C4=C1C=CC=C4O)O)O)C(=O)N)O)N(C)C)O	[M+H]+	197.4	Organoheterocyclic compounds	ac7b00741_si_001.csv
	C[C@@H]1C[C@H]2[C@@H]3C[C@@H](C4=CC(=O)C=C[C@@]4([C@]3([C@H](C[C@@]2([C@]1(C(=O)CO)O)C)O)F)C)F	[M+H]+	193.2	Lipids and lipid-like molecules	ac7b00741_si_001.csv
	C[C@]1(c2c(ccc(c2C(=O)C3=C([C@]4([C@@H](C[C@@H]31)[C@@H](C(=C(C4=O)C(=N)O)O)N(C)C)O)O)O)Cl)O	[M+H]+	203.9	Organoheterocyclic compounds	ac7b00741_si_001.csv
	C[C@]12C=CC3=C4CCC(=O)C=C4CC[C@H]3[C@@H]1CC[C@@H]2O	[M+H]+	163.3	Lipids and lipid-like molecules	ac7b00741_si_001.csv
	C[C@]12CC(=O)[C@H]3[C@H]([C@@H]1CC[C@@]2(C(=O)CO)O)CCC4=CC(=O)C=C[C@]34C	[M+H]+	180.1	Lipids and lipid-like molecules	ac7b00741_si_001.csv
	C[C@]12CC[C@H]3[C@H]([C@@H]1C[C@@H]([C@]2(C)O)O)CC[C@@H]4[C@@]3(Cc5cn[nH]c5C4)C	[M+H]+	192.1	Organoheterocyclic compounds	ac7b00741_si_001.csv
	C[C@]12CC[C@H]3[C@H]([C@@H]1CC[C@@H]2O)CCC4=C(C(=O)CC[C@]34C)Cl	[M+H]+	173.6	Lipids and lipid-like molecules	ac7b00741_si_001.csv
	C[C@]12CC[C@H]3[C@H]([C@@H]1CC[C@@H]2OC)CCC4=CC(=O)C=C[C@]34C	[M+H]+	177.3	Lipids and lipid-like molecules	ac7b00741_si_001.csv
	C[C@]12CC[C@H]3[C@H]([C@@H]1CC[C@]2(C)O)CC[C@@H]4[C@@]3(CC5=C(C4)NN=C5)C	[M+H]+	185.2	Organoheterocyclic compounds	ac7b00741_si_001.csv
	C[C@]12CC[C@H]3[C@H]([C@@H]1CC[C@H]2O)CCC4=CC(=O)CC[C@@H]34	[M+H]+	165.7	Lipids and lipid-like molecules	ac7b00741_si_001.csv
	C[C@]12CCC(=O)C=C1CC[C@@H]3[C@@H]2C(=O)C[C@]4([C@H]3CC[C@@]4(C(=O)CO)O)C	[M+H]+	184	Lipids and lipid-like molecules	ac7b00741_si_001.csv
	C[C@]12CCC(=O)C=C1CC[C@@H]3[C@@H]2CC[C@]4([C@H]3CC[C@]4(C)O)C	[M+H]+	173.7	Lipids and lipid-like molecules	ac7b00741_si_001.csv
	C[C@H]1[C@@H]([C@H]([C@H]([C@@H](O1)O[C@@H]2[C@H]([C@@H]([C@H](O[C@H]2O[C@@]34CC[C@H]5[C@@]6(CCC[C@@]([C@H]6CC[C@]5(C3)CC4=C)(C)C(=O)O[C@H]7[C@@H]([C@H]([C@@H]([C@H](O7)CO)O)O)O)C)CO)O)O)O)O)O	[M+H]+	270.75	Organic oxygen compounds	ac7b00741_si_001.csv
	C[C@H]1C[C@H]2[C@@H]3CCC4=CC(=O)C=C[C@@]4([C@]3([C@H](C[C@@]2([C@]1(C(=O)CCl)O)C)O)F)C	[M+H]+	201.29	Lipids and lipid-like molecules	ac7b00741_si_001.csv
	C[C@H]1C[C@H]2[C@@H]3CCC4=CC(=O)C=C[C@@]4([C@]3([C@H](C[C@@]2([C@]1(C(=O)CO)O)C)O)Cl)C	[M+H]+	189.2	Lipids and lipid-like molecules	ac7b00741_si_001.csv
	C=CCOC(CN1C=CN=C1)C2=C(C=C(C=C2)Cl)Cl	[M+H]+	164.99	Organoheterocyclic compounds	ac7b00741_si_001.csv
	C1=C(C=C(C(=C1Cl)N2C(=C(C(=N2)C#N)S(=O)C(F)(F)F)N)Cl)C(F)(F)F	[M+H]+	180.77	Organoheterocyclic compounds	ac7b00741_si_001.csv
	C1=CC(=C(C(=C1)F)C(=O)NC(=O)NC2=C(C=C(C=C2)OC3=C(C=C(C=C3)C(F)(F)F)Cl)F)F	[M+H]+	204.46	Organoheterocyclic compounds	ac7b00741_si_001.csv
	C1=CC(=C(C(=C1)F)C(=O)NC(=O)NC2=CC(=C(C(=C2)Cl)OC(C(F)F)(F)F)Cl)F	[M+H]+	188.22	Organoheterocyclic compounds	ac7b00741_si_001.csv
	C1=CC(=C(C(=C1)F)C(=O)NC(=O)NC2=CC(=C(C(=C2F)Cl)F)Cl)F	[M+H]+	171.81	Organoheterocyclic compounds	ac7b00741_si_001.csv
	C1=CC(=C(C(=C1)F)C(=O)NC(=O)NC2=CC(=C(C=C2)OC(C(OC(F)(F)F)F)(F)F)Cl)F	[M+H]+	196.35	Organoheterocyclic compounds	ac7b00741_si_001.csv
	C1=CC(=C(C(=C1)F)C(=O)NC(=O)NC2=CC=C(C=C2)Cl)F	[M+H]+	160.98	Benzenoids	ac7b00741_si_001.csv
	C1=CC(=C(C=C1Cl)Cl)C(CN2C=NC=N2)COC(C(F)F)(F)F	[M+H]+	174.34	Organoheterocyclic compounds	ac7b00741_si_001.csv
	C1=CC(=CC=C1N)S(=O)(=O)C2=CC=C(C=C2)N	[M+H]+	149.9	Benzenoids	ac7b00741_si_001.csv
	C1=CC(=CC=C1N)S(=O)(=O)NC2=NC=CS2	[M+H]+	148.2	Benzenoids	ac7b00741_si_001.csv
	C1=CC=C(C(=C1)C(=O)NC(=O)NC2=CC=C(C=C2)OC(F)(F)F)Cl	[M+H]+	169.88	Benzenoids	ac7b00741_si_001.csv
	C1=CC=C(C(=C1)C(CN2C=NC=N2)(C3=CC=C(C=C3)F)O)F	[M+H]+	163.97	Organoheterocyclic compounds	ac7b00741_si_001.csv
	C1=CC=C(C(=C1)C2=CC=C(C=C2)Cl)NC(=O)C3=C(N=CC=C3)Cl	[M+H]+	171.67	Organoheterocyclic compounds	ac7b00741_si_001.csv
	C1=CC=C(C=C1)C(CCC2=CC=C(C=C2)Cl)(CN3C=NC=N3)C#N	[M+H]+	182.44	Organoheterocyclic compounds	ac7b00741_si_001.csv
	C1=CC=C(C=C1)N2C(=O)C(=C(C=N2)N)Cl	[M+H]+	141.59	Organoheterocyclic compounds	ac7b00741_si_001.csv
	C1=CC=C2C(=C1)N=CC(=N2)NS(=O)(=O)C3=CC=C(C=C3)N	[M+H]+	164.8	Organoheterocyclic compounds	ac7b00741_si_001.csv
	C1=CC=NC(=C1)NS(=O)(=O)C2=CC=C(C=C2)N	[M+H]+	142.3	Benzenoids	ac7b00741_si_001.csv
	C1=CC2=C(C=C1O)NC(=N2)C3=CSC=N3	[M+H]+	137.2	Organoheterocyclic compounds	ac7b00741_si_001.csv
	C1=CN=C(N=C1)NS(=O)(=O)C2=CC=C(C=C2)N	[M+H]+	148.7	Benzenoids	ac7b00741_si_001.csv
	c1c(cc(c(c1Cl)N)Cl)C(CNC2CCC(CC2)O)O	[M+H]+	164.7	Benzenoids	ac7b00741_si_001.csv
	c1c(n(c(n1)CO)CCO)[N+](=O)[O-]	[M+H]+	128.2	Lipids and lipid-like molecules	ac7b00741_si_001.csv
	c1cc(c(c2c1cc(cn2)Cl)C(=O)O)Cl	[M+H]+	139.54	Organoheterocyclic compounds	ac7b00741_si_001.csv
	c1cc(cc(c1)Nc2c(cccn2)C(=O)O)C(F)(F)F	[M+H]+	156.8	Organoheterocyclic compounds	ac7b00741_si_001.csv
	c1cc(ccc1C(=O)CCCN2CCC(CC2)(c3ccc(cc3)Cl)O)F	[M+H]+	193.9	Benzenoids	ac7b00741_si_001.csv
	c1cc(ccc1N)S(=O)(=O)Nc2ccc(nn2)Cl	[M+H]+	156.9	Benzenoids	ac7b00741_si_001.csv
	C1CC1NC2=NC(=NC(=N2)N)N	[M+H]+	133.23	Organic acids and derivatives	ac7b00741_si_001.csv
	c1ccc(c(c1)c2nnc(nn2)c3ccccc3Cl)Cl	[M+H]+	161.9	Benzenoids	ac7b00741_si_001.csv
	c1ccc(c(c1)CC(=O)O)Nc2c(cccc2Cl)Cl	[M+H]+	157.2	Benzenoids	ac7b00741_si_001.csv
	C1CN(/C(=N/[N+](=O)[O-])/N1)CC2=CN=C(C=C2)Cl	[M+H]+	149.62	Organoheterocyclic compounds	ac7b00741_si_001.csv
	C1CN(CCN1CCCC(=O)C2=CC=C(C=C2)F)C3=CC=CC=N3	[M+H]+	180.3	Organoheterocyclic compounds	ac7b00741_si_001.csv
	C1CS/C(=N\C#N)/N1CC2=CN=C(C=C2)Cl	[M+H]+	154.84	Organoheterocyclic compounds	ac7b00741_si_001.csv
	C1CSC2=N[C@H](CN21)C3=CC=CC=C3	[M+H]+	138.2	Organoheterocyclic compounds	ac7b00741_si_001.csv
	C2(OC1=CC=C(OC(C)C(=O)O)C=C1)=C(Cl)C=C(C(F)(F)F)C=N2	[M+H]+	179.86	Organoheterocyclic compounds	ac7b00741_si_001.csv
	CC#CC1=NC(=NC(=C1)C)NC2=CC=CC=C2	[M+H]+	152.07	Benzenoids	ac7b00741_si_001.csv
	CC(=C)C1Cc2c(ccc3c2OC4COc5cc(c(cc5C4C3=O)OC)OC)O1	[M+H]+	195.01	Organoheterocyclic compounds	ac7b00741_si_001.csv
	CC(=O)c1ccc2c(c1)N(c3ccccc3S2)CCCN(C)C	[M+H]+	160.5	Organoheterocyclic compounds	ac7b00741_si_001.csv
	CC(C(=O)O)Oc1ccc(cc1)Oc2ccc(cn2)C(F)(F)F	[M+H]+	173.47	Organoheterocyclic compounds	ac7b00741_si_001.csv
	CC(C)(C(=O)OCC=C)OC(=O)C1=C(C=CC(=C1)N2C(=O)C=C(N(C2=O)C)C(F)(F)F)Cl	[M+H]+	208.59	Organoheterocyclic compounds	ac7b00741_si_001.csv
	CC(C)(C)[C@@H]([C@H](CC1=CC=C(C=C1)Cl)N2C=NC=N2)O	[M+H]+	168.73	Organoheterocyclic compounds	ac7b00741_si_001.csv
	CC(C)(C)C(CCC1=CC=C(C=C1)Cl)(CN2C=NC=N2)O	[M+H]+	167.37	Organoheterocyclic compounds	ac7b00741_si_001.csv
30479	CC(C)(C)C1=NN=C(N(C1=O)N)SC	[M+H]+	146.95	Organoheterocyclic compounds	ac7b00741_si_001.csv
	CC(C)(C)NCC(C1=CC(=C(C(=C1)Br)N)Cl)O	[M+H]+	165.2	Benzenoids	ac7b00741_si_001.csv
	CC(C)(C)NCC(C1=CC(=C(C(=C1)Cl)N)C(F)(F)F)O	[M+H]+	168.4	Benzenoids	ac7b00741_si_001.csv
	CC(C)(C)NCC(C1=CC(=C(C=C1)O)CO)O	[M+H]+	158.3	Benzenoids	ac7b00741_si_001.csv
	CC(C)(C)NCC(c1cc(c(c(c1)Br)N)Br)O	[M+H]+	167	Benzenoids	ac7b00741_si_001.csv
	CC(C)(C=NOC(=O)NC)S(=O)C	[M+H]+	145.4	Organic acids and derivatives	ac7b00741_si_001.csv
	CC(C)C(C(=O)NC(C)c1nc2ccc(cc2s1)F)NC(=O)O	[M+H]+	173.38	Organoheterocyclic compounds	ac7b00741_si_001.csv
	CC(C)C1=CC(=CC(=C1NC(=S)NC(C)(C)C)C(C)C)OC2=CC=CC=C2	[M+H]+	199.75	Benzenoids	ac7b00741_si_001.csv
	CC(C)C1=CC=C(C=C1)NC(=O)N(C)C	[M+H]+	150.75	Benzenoids	ac7b00741_si_001.csv
	CC(C)c1ncc(n1C)[N+](=O)[O-]	[M+H]+	126.1	Benzenoids	ac7b00741_si_001.csv
	CC(C)N(C1=CC=CC=C1)C(=O)CCl	[M+H]+	142.07	Benzenoids	ac7b00741_si_001.csv
	CC(C)N1/C(=N/C(C)(C)C)/SCN(C1=O)C2=CC=CC=C2	[M+H]+	173.58	Organoheterocyclic compounds	ac7b00741_si_001.csv
	CC(C)NC(CC)C(O)c2ccc(O)c1NC(=O)C=Cc12	[M+H]+	168	Organoheterocyclic compounds	ac7b00741_si_001.csv
	CC(C)NCC(c1ccc(c(c1)C#N)N)O	[M+H]+	155.4	Benzenoids	ac7b00741_si_001.csv
	CC(C)NCC(COC1=CC=CC2=C1C3=CC=CC=C3N2)O	[M+H]+	165.5	Organoheterocyclic compounds	ac7b00741_si_001.csv
	CC(C)OC1=C(C=C(C(=C1)N2C(=O)OC(=N2)C(C)(C)C)Cl)Cl	[M+H]+	182.17	Organoheterocyclic compounds	ac7b00741_si_001.csv
	CC(C)OC1=CC=CC(=C1)NC(=O)C2=CC=CC=C2C(F)(F)F	[M+H]+	175.45	Benzenoids	ac7b00741_si_001.csv
	CC(C1=CC(=CC=C1)C(=O)C2=CC=CC=C2)C(=O)O	[M+H]+	155.4	Benzenoids	ac7b00741_si_001.csv
	CC(c1ccc(cc1)N2Cc3ccccc3C2=O)C(=O)O	[M+H]+	166.4	Organoheterocyclic compounds	ac7b00741_si_001.csv
	CC(c1ccc2c3cc(ccc3[nH]c2c1)Cl)C(=O)O	[M+H]+	156.1	Organoheterocyclic compounds	ac7b00741_si_001.csv
	CC(CC1=CC=C(C=C1)C(C)(C)C)CN2CCCCC2	[M+H]+	166.39	Benzenoids	ac7b00741_si_001.csv
	CC(Cc1ccc(cc1)O)NCC(c2cc(cc(c2)O)O)O	[M+H]+	180.4	Benzenoids	ac7b00741_si_001.csv
	CC(CCC1=CC=C(C=C1)O)NCC(C2=CC=C(C=C2)O)O	[M+H]+	168.9	Benzenoids	ac7b00741_si_001.csv
	CC(COc1ccc(cc1)Oc2ccccc2)Oc3ccccn3	[M+H]+	182.76	Benzenoids	ac7b00741_si_001.csv
	CC/C(=N\OC/C=C/Cl)/C1=C(CC(CC1=O)C2CCOCC2)O	[M+H]+	184.74	Lipids and lipid-like molecules	ac7b00741_si_001.csv
	CC1(C(=C(C(=O)O1)OCC2CC2)c3ccc(cc3)S(=O)(=O)C)C	[M+H]+	182.1	Organoheterocyclic compounds	ac7b00741_si_001.csv
	CC1(CCC(C1(CN2C=NC=N2)O)CC3=CC=C(C=C3)Cl)C	[M+H]+	168.62	Organoheterocyclic compounds	ac7b00741_si_001.csv
	CC1(CCCCC1)C(=O)NC2=C(C(=C(C=C2)O)Cl)Cl	[M+H]+	164.82	Benzenoids	ac7b00741_si_001.csv
	CC1=C(C(=CC=C1)C)N(C(C)C(=O)OC)C(=O)C2=CC=CO2	[M+H]+	167.15	Organoheterocyclic compounds	ac7b00741_si_001.csv
	CC1=C(C(=CC=C1)C)N(C(C)C(=O)OC)C(=O)COC	[M+H]+	159.96	Organic acids and derivatives	ac7b00741_si_001.csv
	CC1=C(C(=CC=C1)NC2=CC=CC=C2C(=O)O)C	[M+H]+	150.5	Benzenoids	ac7b00741_si_001.csv
	CC1=C(C=CC=C1Cl)NC2=CC=CC=C2C(=O)O	[M+H]+	153.7	Benzenoids	ac7b00741_si_001.csv
	CC1=C(C=CC=C1NC2=C(C=CC=N2)C(=O)O)C(F)(F)F	[M+H]+	159.1	Organoheterocyclic compounds	ac7b00741_si_001.csv
	CC1=C(N=C(N=C1OC(=O)N(C)C)N(C)C)C	[M+H]+	154.68	Organoheterocyclic compounds	ac7b00741_si_001.csv
	CC1=C(SCCO1)C(=O)NC2=CC=CC=C2	[M+H]+	149.35	Benzenoids	ac7b00741_si_001.csv
	CC1=CC(=NC(=N1)NC2=CC=CC=C2)C	[M+H]+	142.95	Benzenoids	ac7b00741_si_001.csv
	CC1=CC(=NC(=N1)NC2=CC=CC=C2)C3CC3	[M+H]+	152.07	Benzenoids	ac7b00741_si_001.csv
	CC1=CC(=NO1)NS(=O)(=O)C2=CC=C(C=C2)N	[M+H]+	146.3	Benzenoids	ac7b00741_si_001.csv
	CC1=NC(=NC(=N1)OC)NC(=O)NS(=O)(=O)C2=CC=CC=C2Cl	[M+H]+	175.29	Organoheterocyclic compounds	ac7b00741_si_001.csv
	CC1=NC(=NC=C1)NS(=O)(=O)C2=CC=C(C=C2)N	[M+H]+	154.8	Benzenoids	ac7b00741_si_001.csv
	CC1=NC=C(N1C)[N+](=O)[O-]	[M+H]+	116.4	Organic acids and derivatives	ac7b00741_si_001.csv
	CC1=NN(C(=C1/C=N/OCC2=CC=C(C=C2)C(=O)OC(C)(C)C)OC3=CC=CC=C3)C	[M+H]+	215.89	Organoheterocyclic compounds	ac7b00741_si_001.csv
	CC1=NN(C(=O)N1C(F)F)C2=CC(=C(C=C2Cl)Cl)NS(=O)(=O)C	[M+H]+	173.63	Organoheterocyclic compounds	ac7b00741_si_001.csv
	CC1=NN=C(C(=O)N1N)C2=CC=CC=C2	[M+H]+	140.93	Organoheterocyclic compounds	ac7b00741_si_001.csv
	CC1=NNC(=O)N(C1)/N=C/C2=CN=CC=C2	[M+H]+	150.71	Organoheterocyclic compounds	ac7b00741_si_001.csv
	CC12C=CC3=C4CCC(=O)C=C4CCC3C1CCC2O	[M+H]+	163.3	Lipids and lipid-like molecules	ac7b00741_si_001.csv
	Cc1c(noc1NS(=O)(=O)c2ccc(cc2)N)C	[M+H]+	157.4	Organoheterocyclic compounds	ac7b00741_si_001.csv
	Cc1cc(nc(n1)NS(=O)(=O)c2ccc(cc2)N)C	[M+H]+	159.7	Benzenoids	ac7b00741_si_001.csv
	Cc1ccc(cc1)C(=O)c2ccc(n2C)CC(=O)O	[M+H]+	156.7	Organoheterocyclic compounds	ac7b00741_si_001.csv
	Cc1ccc(cc1)c2c(nc(n2S(=O)(=O)N(C)C)C#N)Cl	[M+H]+	166.69	Organoheterocyclic compounds	ac7b00741_si_001.csv
	Cc1ccc(cc1Cl)/N=C(\N(C)C)/O	[M+H]+	145.96	Benzenoids	ac7b00741_si_001.csv
	CC1CCC2=C3N1C=C(C(=O)C3=CC(=C2)F)C(=O)O	[M+H]+	147.6	Organoheterocyclic compounds	ac7b00741_si_001.csv
	Cc1ccsc1/C=C/C2=NCCCN2C	[M+H]+	149.7	Organoheterocyclic compounds	ac7b00741_si_001.csv
	Cc1cnc(s1)/N=C(/C2=C(c3ccccc3S(=O)(=O)N2C)O)\O	[M+H]+	174.9	Organoheterocyclic compounds	ac7b00741_si_001.csv
	CC1COC(O1)(Cn2cncn2)c3ccc(cc3Cl)Oc4ccc(cc4)Cl	[M+H]+	198.48	Organoheterocyclic compounds	ac7b00741_si_001.csv
	Cc1nc(nc(n1)OC)NC(=O)NS(=O)(=O)c2ccccc2CCC(F)(F)F	[M+H]+	187.01	Organoheterocyclic compounds	ac7b00741_si_001.csv
	Cc1ncc(n1CCO)[N+](=O)[O-]	[M+H]+	124.2	Lipids and lipid-like molecules	ac7b00741_si_001.csv
	Cc1nnc(s1)NS(=O)(=O)c2ccc(cc2)N	[M+H]+	152.2	Benzenoids	ac7b00741_si_001.csv
	CCC(=O)c1ccc2c(c1)N(c3ccccc3S2)CCCN(C)C	[M+H]+	182.8	Organoheterocyclic compounds	ac7b00741_si_001.csv
	CCC(C)(C)NCC(O)c1cc(Cl)c(N)c(Cl)c1	[M+H]+	165	Benzenoids	ac7b00741_si_001.csv
	CCC(C)(CC)C1=NOC(=C1)NC(=O)C2=C(C=CC=C2OC)OC	[M+H]+	184.93	Organoheterocyclic compounds	ac7b00741_si_001.csv
	CCC[C@@H]1C[C@H](N(C1)C)C(=O)N[C@@H]([C@@H]2[C@@H]([C@@H]([C@H]([C@H](O2)SC)O)O)O)[C@@H](C)O	[M+H]+	201.8	Organic oxygen compounds	ac7b00741_si_001.csv
	CCC1=CC=CC(=C1N(C(C)COC)C(=O)CCl)C	[M+H]+	158.23	Benzenoids	ac7b00741_si_001.csv
	CCC1=NN(C(=C1Cl)C(=O)NCC2=CC=C(C=C2)C(C)(C)C)C	[M+H]+	191.25	Organoheterocyclic compounds	ac7b00741_si_001.csv
	CCCCC(CN1C=NC=N1)(C2=C(C=C(C=C2)Cl)Cl)O	[M+H]+	171.26	Organoheterocyclic compounds	ac7b00741_si_001.csv
	CCCCC1=C(N=C(NC1=O)NCC)C	[M+H]+	150.65	Organoheterocyclic compounds	ac7b00741_si_001.csv
	CCCCCCCCSC(=O)OC1=CC(=NN=C1C2=CC=CC=C2)Cl	[M+H]+	199.9	Organoheterocyclic compounds	ac7b00741_si_001.csv
	CCCCOC(=O)[C@@H](C)Oc1ccc(cc1)Oc2ccc(cn2)C(F)(F)F	[M+H]+	194.8	Organoheterocyclic compounds	ac7b00741_si_001.csv
	CCCCOC(=O)N(C)SN(C)C(=O)OC1=CC=CC2=C1OC(C2)(C)C	[M+H]+	190.73	Organoheterocyclic compounds	ac7b00741_si_001.csv
	CCCN(CCC)C(=O)SCC1=CC=CC=C1	[M+H]+	156.95	Benzenoids	ac7b00741_si_001.csv
	CCCSP(=O)(OCC)SCCC	[M+H]+	149.27	Organic acids and derivatives	ac7b00741_si_001.csv
	CCN(CC)C(=O)c1cccc(c1)C	[M+H]+	142.48	Benzenoids	ac7b00741_si_001.csv
	CCN(CC)CCSCC(=O)O[C@@H]1C[C@@]([C@H]([C@@H]([C@@]23CCC(C1([C@@H]2C(=O)CC3)C)C)C)O)(C)C=C	[M+H]+	218.9	Lipids and lipid-like molecules	ac7b00741_si_001.csv
	CCN(CC1=CN=C(C=C1)Cl)/C(=C/[N+](=O)[O-])/NC	[M+H]+	160.32	Organoheterocyclic compounds	ac7b00741_si_001.csv
	CCN1C=C(C(=O)C2=C1N=C(C=C2)C)C(=O)O	[M+H]+	141.4	Organoheterocyclic compounds	ac7b00741_si_001.csv
	CCN1C=C(C(=O)C2=CC3=C(C=C21)OCO3)C(=O)O	[M+H]+	147.8	Organoheterocyclic compounds	ac7b00741_si_001.csv
	CCNC1=NC(=NC(=N1)Cl)NC(C)(C)C	[M+H]+	153.48	Organic acids and derivatives	ac7b00741_si_001.csv
	CCNC1=NC(=NC(=N1)Cl)NCC	[M+H]+	142.09	Organic acids and derivatives	ac7b00741_si_001.csv
	CCOC(=O)C1CC(=O)C(=C(C2CC2)O)C(=O)C1	[M+H]+	152.92	Lipids and lipid-like molecules	ac7b00741_si_001.csv
	CCOC(=O)NCCOC1=CC=C(C=C1)OC2=CC=CC=C2	[M+H]+	178.44	Benzenoids	ac7b00741_si_001.csv
	CCOC(=O)OC1=C(C(=O)NC12CCC(CC2)OC)C3=C(C=CC(=C3)C)C	[M+H]+	189.99	Organoheterocyclic compounds	ac7b00741_si_001.csv
	CCOCCOC(=O)C(C)OC1=CC=C(C=C1)OC2=C(C=C(C=N2)C(F)(F)F)Cl	[M+H]+	193.53	Organoheterocyclic compounds	ac7b00741_si_001.csv
	CCOP(=O)(NC(C)C)Oc1ccc(c(c1)C)S(=O)(=O)C	[M+H]+	179.48	Organoheterocyclic compounds	ac7b00741_si_001.csv
	CCOP(=O)(OCC)Oc1ccc(cc1)[N+](=O)[O-]	[M+H]+	156.76	Benzenoids	ac7b00741_si_001.csv
	CCOP(=S)(OCC)OC1=NC2=CC=CC=C2N=C1	[M+H]+	165.1	Organoheterocyclic compounds	ac7b00741_si_001.csv
	CCOP(=S)(OCC)SCS(=O)(=O)C(C)(C)C	[M+H]+	172.88	Organic acids and derivatives	ac7b00741_si_001.csv
	CCS(=O)(=O)CCSP(=O)(OC)OC	[M+H]+	143.66	Organic acids and derivatives	ac7b00741_si_001.csv
	Clc1cc(cc(Cl)c1N)C(O)CNC(C)(C)C	[M+H]+	159.2	Benzenoids	ac7b00741_si_001.csv
	Clc1ccc(cc1)\C=C2\C(O)(C(CC2)(C)C)Cn3ncnc3	[M+H]+	179.18	Organoheterocyclic compounds	ac7b00741_si_001.csv
	Clc1ccc(cc1)C3SC(=O)N(C(=O)NC2CCCCC2)C3C	[M+H]+	183.83	Organoheterocyclic compounds	ac7b00741_si_001.csv
	Clc1ccc(cc1)CN(C(=O)Nc2ccccc2)C3CCCC3	[M+H]+	179.71	Benzenoids	ac7b00741_si_001.csv
	CN(C(=O)NC1=CC(=C(C=C1)Br)Cl)OC	[M+H]+	152.25	Benzenoids	ac7b00741_si_001.csv
	CN(C(=O)NC1=CC(=C(C=C1)Cl)Cl)OC	[M+H]+	149.63	Benzenoids	ac7b00741_si_001.csv
	CN(C(=O)NC1=CC=C(C=C1)Br)OC	[M+H]+	145.41	Benzenoids	ac7b00741_si_001.csv
	CN(C(=O)NC1=CC=C(C=C1)Cl)OC	[M+H]+	142.9	Benzenoids	ac7b00741_si_001.csv
	CN(C)C(=O)Nc1ccc(cc1)Oc2ccc(cc2)Cl	[M+H]+	172.24	Benzenoids	ac7b00741_si_001.csv
	CN(C)CCCN1C2=CC=CC=C2SC3=C1C=C(C=C3)Cl	[M+H]+	169.1	Organoheterocyclic compounds	ac7b00741_si_001.csv
	CN1C(=C(c2ccccc2S1(=O)=O)O)/C(=N/c3ccccn3)/O	[M+H]+	170.9	Organoheterocyclic compounds	ac7b00741_si_001.csv
	CN1C(=CN=C1COC(=O)N)[N+](=O)[O-]	[M+H]+	131.6	Organoheterocyclic compounds	ac7b00741_si_001.csv
	CN1CCCN=C1/C=C/c2cccs2	[M+H]+	143	Organic acids and derivatives	ac7b00741_si_001.csv
	CN1CCN(CC1)C2=C(C=C3C4=C2OCN(N4C=C(C3=O)C(=O)O)C)F	[M+H]+	179.6	Organoheterocyclic compounds	ac7b00741_si_001.csv
	CNC(=O)N(C)c1nc2ccccc2s1	[M+H]+	142.47	Organoheterocyclic compounds	ac7b00741_si_001.csv
	CNC(=O)OC1=CC=CC(=C1)N=CN(C)C	[M+H]+	153.76	Benzenoids	ac7b00741_si_001.csv
	CO/C=C(\C1=CC=CC=C1COC2=CC=CC(=N2)C(F)(F)F)/C(=O)OC	[M+H]+	177.5	Organoheterocyclic compounds	ac7b00741_si_001.csv
	CO/C=C(\C1=CC=CC=C1OC2=NC=NC(=C2)OC3=CC=CC=C3C#N)/C(=O)OC	[M+H]+	195.75	Organoheterocyclic compounds	ac7b00741_si_001.csv
	COC(=O)[C@]12Cc3cc(ccc3C1=NN(CO2)C(=O)N(c4ccc(cc4)OC(F)(F)F)C(=O)OC)Cl	[M+H]+	207.03	Organoheterocyclic compounds	ac7b00741_si_001.csv
	COC(=O)N(c1ccccc1COc2ccn(n2)c3ccc(cc3)Cl)OC	[M+H]+	183.19	Organoheterocyclic compounds	ac7b00741_si_001.csv
	COC(=O)NC(=S)NC1=CC=CC=C1NC(=S)NC(=O)OC	[M+H]+	174.24	Benzenoids	ac7b00741_si_001.csv
	COC(=O)NC1=NC2=CC=CC=C2N1	[M+H]+	134.94	Organoheterocyclic compounds	ac7b00741_si_001.csv
	COC1=C(C=CC(=C1)CCNC(=O)C(C2=CC=C(C=C2)Cl)OCC#C)OCC #C	[M+H]+	195.15	Benzenoids	ac7b00741_si_001.csv
	COC1=C(N=CN=C1OC)NS(=O)(=O)C2=CC=C(C=C2)N	[M+H]+	166.6	Organoheterocyclic compounds	ac7b00741_si_001.csv
	COc1cc(nc(n1)OC)NS(=O)(=O)c2ccc(cc2)N	[M+H]+	166	Organoheterocyclic compounds	ac7b00741_si_001.csv
	COc1ccc(cc1OC)/C(=C/C(=O)N2CCOCC2)/c3ccc(cc3)Cl	[M+H]+	199.03	Benzenoids	ac7b00741_si_001.csv
	COP(=O)(C(C(Cl)(Cl)Cl)O)OC	[M+H]+	136.12	Organic acids and derivatives	ac7b00741_si_001.csv
	COP(=O)(OC)OC=C(Cl)Cl	[M+H]+	133.07	Organic acids and derivatives	ac7b00741_si_001.csv
	COP(=O)(OC)OC1=C(C2C1CC=C2)Cl	[M+H]+	144.04	Organoheterocyclic compounds	ac7b00741_si_001.csv
	CS(=O)(=O)C1=CC(=C(C=C1)C(=O)C2C(=O)CCCC2=O)[N+](=O)[O-]	[M+H]+	175.66	Organoheterocyclic compounds	ac7b00741_si_001.csv
	Fc1ccc(cc1)N\3c2cc(c(F)cc2C(=O)C(/C(=O)O)=C/3)N4CCN(C)CC4	[M+H]+	192.3	Organoheterocyclic compounds	ac7b00741_si_001.csv
	Fc1ccc(cc1)N\3c2cc(c(F)cc2C(=O)C(/C(=O)O)=C/3)N4CCNCC4	[M+H]+	202	Organoheterocyclic compounds	ac7b00741_si_001.csv
	Ic2ccc1\N=C(\OCCC)N(C(=O)c1c2)CCC	[M+H]+	169.35	Organoheterocyclic compounds	ac7b00741_si_001.csv
	O=C(N(CCOc1c(Cl)cc(Cl)cc1Cl)C(C)C)n2ccnc2	[M+H]+	161.68	Benzenoids	ac7b00741_si_001.csv
	O=C(O)\C2=C\N(c1cc(c(F)cc1C2=O)N3CCNCC3)CC	[M+H]+	171	Organoheterocyclic compounds	ac7b00741_si_001.csv
	O=C(O)\C3=C\N(c2cc(N1CCN(CC)CC1)c(F)cc2C3=O)C4CC4	[M+H]+	194.8	Organoheterocyclic compounds	ac7b00741_si_001.csv
	O=C2\C(=C(/N(N2c1ccccc1)C)C)C(C)C	[M+H]+	150	Organoheterocyclic compounds	ac7b00741_si_001.csv
11953895	[C-]#N.[C-]#N.[C-]#N.[C-]#N.[C-]#N.[N-]=O.O.O.[Na+].[Na+].[Fe+4]	[M+H]+	146.5552495	Organic acids and derivatives	drugCCS_ac7b01709_si_003.csv
11333	C([C@@H]1[C@@H]([C@@H]([C@H]([C@@H](O1)O[C@@H]2[C@H](O[C@@]([C@H]2O)(CO)O)CO)O)O)O)O	[M+H]+	169.1516666	Organic oxygen compounds	drugCCS_ac7b01709_si_003.csv
7314	C([C@@H]1[C@@H]([C@@H]([C@H]([C@@H](O1)O[C@H]([C@@H](CO)O)[C@@H]([C@H](C(=O)O)O)O)O)O)O)O	[M+H]+	168.6600094	Organic oxygen compounds	drugCCS_ac7b01709_si_003.csv
7027	C([C@@H]1[C@H]([C@@H]([C@H](C(=O)O1)O)O)O)O	[M+H]+	127.6418258	Organic oxygen compounds	drugCCS_ac7b01709_si_003.csv
2723635	C([C@@H]1[C@H]([C@@H]([C@H](C(O1)O)N)O)O)O.Cl	[M+H]+	145.1933934	Organic oxygen compounds	drugCCS_ac7b01709_si_003.csv
7057995	C([C@H]([C@@H]1[C@@H]([C@@H]2[C@H](O1)O[C@@H](O2)C(Cl)(Cl)Cl)O)O)O	[M+H]+	163.1797057	Organic oxygen compounds	drugCCS_ac7b01709_si_003.csv
73563	C([C@H]([C@H]([C@@H]([C@H](C(=O)O)N)O)O)O)O	[M+H]+	138.828249	Organic oxygen compounds	drugCCS_ac7b01709_si_003.csv
25150	C(C(C(=O)O)N)S.Cl	[M+H]+	123.2637508	Organic acids and derivatives	drugCCS_ac7b01709_si_003.csv
595	C(C(C(=O)O)N)SSCC(C(=O)O)N	[M+H]+	148.137886	Organic acids and derivatives	drugCCS_ac7b01709_si_003.csv
875	C(C(C(=O)O)O)(C(=O)O)O	[M+H]+	124.356677	Organic acids and derivatives	drugCCS_ac7b01709_si_003.csv
66250	C(C[C@@H](C(=O)O)N)CN=C(N)N.Cl	[M+H]+	135.5461485	Organic acids and derivatives	drugCCS_ac7b01709_si_003.csv
23663870	C(CC(=O)[O-])CO.[Na+]	[M+H]+	121.5475668	Organic acids and derivatives	drugCCS_ac7b01709_si_003.csv
124886	C(CC(=O)N[C@@H](CS)C(=O)NCC(=O)O)[C@@H](C(=O)O)N	[M+H]+	165.6998877	Organic acids and derivatives	drugCCS_ac7b01709_si_003.csv
16760285	C(CC(O)(P(=O)(O)O)P(=O)(O)[O-])CN.[Na+]	[M+H]+	155.3712103	Organic acids and derivatives	drugCCS_ac7b01709_si_003.csv
3053	C(CN(CC(=O)O)CC(=O)O)N(CCN(CC(=O)O)CC(=O)O)CC(=O)O	[M+H]+	180.2497239	Organic acids and derivatives	drugCCS_ac7b01709_si_003.csv
2141	C(CN)CNCCSP(=O)(O)O	[M+H]+	146.922124	Organic acids and derivatives	drugCCS_ac7b01709_si_003.csv
71433	C(CNCCNCCN)N.Cl.Cl	[M+H]+	138.7824503	Organic acids and derivatives	drugCCS_ac7b01709_si_003.csv
439202	C(CON=C(N)N)[C@@H](C(=O)O)N	[M+H]+	133.2623564	Organic acids and derivatives	drugCCS_ac7b01709_si_003.csv
5380394	C/C=C(/C)\C(=O)O[C@H]1CC[C@]2([C@H]3[C@@]1(O[C@@]24C[C@]5([C@@H]6CN7C[C@H](CC[C@H]7[C@@]([C@]6([C@H](C[C@]5([C@@H]4CC3)O)O)O)(C)O)C)O)O)C	[M+H]+	237.2262682	Organic oxygen compounds	drugCCS_ac7b01709_si_003.csv
5702002	C/C=C(/C)\C(=O)O[C@H]1CC[C@]2([C@H]3[C@@]1(O[C@@]24C[C@]5([C@@H]6CN7C[C@H](CC[C@H]7[C@@]([C@]6([C@H](C[C@]5([C@@H]4CC3)O)O)O)(C)O)C)O)O)C.OS(=O)(=O)O	[M+H]+	237.6255394	Organic oxygen compounds	drugCCS_ac7b01709_si_003.csv
637796	C/C=C/C1=CC2=C(C=C1)OCO2	[M+H]+	138.4398709	Benzenoids	drugCCS_ac7b01709_si_003.csv
2513	C[As](=O)(C)O	[M+H]+	112.4972537	Organic acids and derivatives	drugCCS_ac7b01709_si_003.csv
54675779	C[C@@]1([C@H]2[C@@H]([C@H]3[C@@H](C(=O)C(=C([C@]3(C(=O)C2=C(C4=C1C=CC=C4O)O)O)O)C(=O)N)N(C)C)O)O	[M+H]+	203.8461336	Organoheterocyclic compounds	drugCCS_ac7b01709_si_003.csv
54682468	C[C@@]1([C@H]2C[C@H]3[C@@H](C(=O)C(=C([C@]3(C(=O)C2=C(C4=C(C=CC(=C41)Cl)O)O)O)O)C(=O)N)N(C)C)O.Cl	[M+H]+	197.8019321	Organoheterocyclic compounds	drugCCS_ac7b01709_si_003.csv
54704426	C[C@@]1([C@H]2C[C@H]3[C@@H](C(=O)C(=C([C@]3(C(=O)C2=C(C4=C1C=CC=C4O)O)O)O)C(=O)N)N(C)C)O.Cl	[M+H]+	193.6775179	Organoheterocyclic compounds	drugCCS_ac7b01709_si_003.csv
71171	C[C@@]1(C(=O)N2[C@H](C(=O)N3CCC[C@H]3[C@@]2(O1)O)CC4=CC=CC=C4)NC(=O)[C@@H]5C[C@H]6[C@@H](CC7=CNC8=CC=CC6=C78)N(C5)C.CS(=O)(=O)O	[M+H]+	227.3766294	Organoheterocyclic compounds	drugCCS_ac7b01709_si_003.csv
9787	C[C@@]1(C(=O)N2[C@H](C(=O)N3CCC[C@H]3[C@@]2(O1)O)CC4=CC=CC=C4)NC(=O)[C@H]5CN([C@@H]6CC7=CNC8=CC=CC(=C78)C6=C5)C.C[C@@]1(C(=O)N2[C@H](C(=O)N3CCC[C@H]3[C@@]2(O1)O)CC4=CC=CC=C4)NC(=O)[C@H]5CN([C@@H]6CC7=CNC8=CC=CC(=C78)C6=C5)C.[C@@H]([C@H](C(=O)O)O)(C(=O)O)O	[M+H]+	231.8482444	Organoheterocyclic compounds	drugCCS_ac7b01709_si_003.csv
6710676	C[C@@]12CC[C@@H]3[C@H](CC3(C)C)C(=O)CC[C@H]1O2	[M+H]+	146.3117148	Lipids and lipid-like molecules	drugCCS_ac7b01709_si_003.csv
6710724	C[C@@]12CC[C@@H]3C(=C)[C@]1(CC(=O)O[C@H]2C4=COC=C4)O[C@@H]5[C@]3([C@H](C([C@H](C5)O)(C)C)CC(=O)OC)C	[M+H]+	204.0931938	Organoheterocyclic compounds	drugCCS_ac7b01709_si_003.csv
21596309	C[C@@]12CC[C@H]3C(=C1CC(=O)O[C@H]2C4=COC=C4)C[C@@H]5C(=O)[C@]3([C@H](C(C5=O)(C)C)CC(=O)OC)C	[M+H]+	203.8533532	Organoheterocyclic compounds	drugCCS_ac7b01709_si_003.csv
46878983	C[C@@]12CC[C@H]3C(C1=CC(=O)O[C@H]2C4=COC=C4)C[C@@H]5C(=O)[C@]3([C@H](C(C5=O)(C)C)CC(=O)OC)C	[M+H]+	206.1476538	Organoheterocyclic compounds	drugCCS_ac7b01709_si_003.csv
6708727	C[C@@]12CCC3[C@@]4([C@H](C(C5(C(C4=O)CC3(C1=CC(=O)O[C@H]2C6=COC=C6)O5)O)(C)C)CC(=O)OC)C	[M+H]+	208.7618301	Organoheterocyclic compounds	drugCCS_ac7b01709_si_003.csv
6708622	C[C@@]12CCC3[C@@]4(C(CC(=O)[C@]3([C@@]15[C@H](O5)C(=O)O[C@H]2C6=COC=C6)C)C([C@@H](CC4=O)O)(C)C)C	[M+H]+	199.703398	Organoheterocyclic compounds	drugCCS_ac7b01709_si_003.csv
6857755	C[C@@]12CCC3[C@](C1=CC(=O)O[C@H]2C4=COC=C4)(C[C@H]5C(=O)C([C@@H](C3(C5=O)C)CC(=O)O)(C)C)O	[M+H]+	202.8931901	Organoheterocyclic compounds	drugCCS_ac7b01709_si_003.csv
6708676	C[C@@]12CCC3[C@]4([C@H](C[C@H](C(C4C[C@H]([C@]3([C@@]15[C@H](O5)C(=O)O[C@H]2C6=COC=C6)C)O)(C)C)O)O)C	[M+H]+	201.5350479	Organoheterocyclic compounds	drugCCS_ac7b01709_si_003.csv
6708618	C[C@@]12CCC3[C@]4([C@H](C[C@H](C(C4CC(=O)[C@]3(C15C(O5)C(=O)O[C@H]2C6=COC=C6)C)(C)C)O)O)C	[M+H]+	200.1574886	Organoheterocyclic compounds	drugCCS_ac7b01709_si_003.csv
6708525	C[C@@]12CCC3[C@]4(C=CC(=O)C(C4CC(=O)[C@]3([C@@]15[C@H](O5)C(=O)O[C@H]2C6=COC=C6)C)(C)C)C	[M+H]+	196.6166271	Organoheterocyclic compounds	drugCCS_ac7b01709_si_003.csv
6708728	C[C@@]12CCC3=C(C1=CC(=O)O[C@H]2C4=COC=C4)C[C@@H]5C(=O)[C@]3([C@H](C(C5=O)(C)C)CC(=O)OC)C	[M+H]+	206.2872222	Organoheterocyclic compounds	drugCCS_ac7b01709_si_003.csv
6708540	C[C@@]12CCC3C(=C)[C@]1(CC(=O)O[C@H]2C4=COC=C4)O[C@@H]5[C@]3([C@H](C(C(=O)C5)(C)C)C(C(=O)OC)O)C	[M+H]+	207.593099	Organoheterocyclic compounds	drugCCS_ac7b01709_si_003.csv
6708562	C[C@@]12CCC3C(=C)[C@]1(CC(=O)O[C@H]2C4=COC=C4)O[C@@H]5[C@]3(C(C(C(C5)O)(C)C)CC(=O)OC)C	[M+H]+	204.5541346	Organoheterocyclic compounds	drugCCS_ac7b01709_si_003.csv
6857784	C[C@@]12CCC3C(CC(=O)O[C@]3(C1)C4CC(C4CC2)(C)C)C(=O)O	[M+H]+	174.9088058	Lipids and lipid-like molecules	drugCCS_ac7b01709_si_003.csv
657348	C[C@@]12CCN([C@@H]1N(C3=C2C=C(C=C3)OC(=O)NC)C)C.C1=CC=C(C(=C1)C(=O)O)O	[M+H]+	167.8990763	Organoheterocyclic compounds	drugCCS_ac7b01709_si_003.csv
31728	C[C@@H]([C@@H](C1=CC=C(C=C1)O)O)NCCC2=CC=C(C=C2)O.Cl	[M+H]+	166.5103813	Benzenoids	drugCCS_ac7b01709_si_003.csv
96801	C[C@@H](C(=O)N[C@@H](CC(C)C)C(=O)O)N	[M+H]+	152.488398	Organic acids and derivatives	drugCCS_ac7b01709_si_003.csv
6427358	C[C@@H](CCC=C(C)C)[C@@H]1CC[C@]2([C@]1(CCC3=C2CC[C@@H]4C3(CCC(C4(C)C)OC(=O)C)C)C)C	[M+H]+	218.0444009	Lipids and lipid-like molecules	drugCCS_ac7b01709_si_003.csv
6437065	C[C@@H](CO)NC(=O)[C@H]1CN([C@@H]2CC3=CNC4=CC=CC(=C34)C2=C1)C.C(=C\C(=O)O)\C(=O)O	[M+H]+	178.9518048	Organoheterocyclic compounds	drugCCS_ac7b01709_si_003.csv
457193	C[C@@H]1[C@@H](C(=O)N[C@@H](C(=O)N2CCC[C@H]2C(=O)N(CC(=O)N([C@H](C(=O)O1)C(C)C)C)C)C(C)C)NC(=O)C3=C4C(=C(C=C3)C)OC5=C(C(=O)C(=C(C5=N4)C(=O)N[C@H]6[C@H](OC(=O)[C@@H](N(C(=O)CN(C(=O)[C@@H]7CCCN7C(=O)[C@H](NC6=O)C(C)C)C)C)C(C)C)C)N)C	[M+H]+	341.2316659	Organoheterocyclic compounds	drugCCS_ac7b01709_si_003.csv
41774	C[C@@H]1[C@H]([C@@H]([C@H]([C@H](O1)O[C@@H]2[C@H](O[C@@H]([C@@H]([C@H]2O)O)O[C@@H]3[C@H](OC([C@@H]([C@H]3O)O)O)CO)CO)O)O)N[C@H]4C=C([C@H]([C@@H]([C@H]4O)O)O)CO	[M+H]+	230.9755325	Organic oxygen compounds	drugCCS_ac7b01709_si_003.csv
2724385	C[C@@H]1[C@H]([C@H](C[C@@H](O1)O[C@@H]2[C@H](O[C@H](C[C@@H]2O)O[C@@H]3[C@H](O[C@H](C[C@@H]3O)O[C@H]4CC[C@]5([C@@H](C4)CC[C@@H]6[C@@H]5C[C@H]([C@]7([C@@]6(CC[C@@H]7C8=CC(=O)OC8)O)C)O)C)C)C)O)O	[M+H]+	322.483465	Organic oxygen compounds	drugCCS_ac7b01709_si_003.csv
656630	C[C@@H]1[C@H]([C@H](C[C@@H](O1)O[C@H]2CC[C@]3([C@@H](C2)CC[C@@H]4[C@@H]3C[C@H]([C@]5([C@@]4(CC[C@@H]5C6=CC(=O)OC6)O)C)O)C)O)O[C@H]7C[C@@H]([C@@H]([C@H](O7)C)O[C@H]8C[C@@H]([C@@H]([C@H](O8)C)O[C@H]9[C@@H]([C@H]([C@@H]([C@H](O9)CO)O)O)O)OC(=O)C)O	[M+H]+	289.4207851	Organic oxygen compounds	drugCCS_ac7b01709_si_003.csv
88045	C[C@@H]1[C@H](C[C@@H]([C@H](O1)OC2[C@@H]([C@H](C([C@@H]([C@@H]2O)O)O)O)O)N)N=C(C(=O)O)N.Cl	[M+H]+	185.3644913	Organic oxygen compounds	drugCCS_ac7b01709_si_003.csv
54680783	C[C@@H]1[C@H](OC=C2C1=C(C(=C(C2=O)C(=O)O)O)C)C	[M+H]+	150.2021977	Organic oxygen compounds	drugCCS_ac7b01709_si_003.csv
54685920	C[C@@H]1[C@H]2[C@@H]([C@H]3[C@@H](C(=O)C(=C([C@]3(C(=O)C2=C(C4=C1C=CC=C4O)O)O)O)C(=O)N)N(C)C)O.Cl	[M+H]+	195.5791116	Organoheterocyclic compounds	drugCCS_ac7b01709_si_003.csv
6419898	C[C@@H]1C/C=C/C=C/[C@@H]([C@@H](C[C@@H]([C@@H]([C@H]([C@@H](CC(=O)O1)O)OC)OC2C(C(C(C(O2)C)OC3CC(C(C(O3)C)O)(C)O)N(C)C)O)CC=O)C)OC4CCC(C(O4)C)N(C)C	[M+H]+	317.0160855	Organic oxygen compounds	drugCCS_ac7b01709_si_003.csv
16490	C[C@@H]1C[C@H]2[C@@H]3C[C@@H](C4=CC(=O)C=C[C@@]4([C@]3([C@H](C[C@@]2([C@]1(C(=O)CO)O)C)O)F)C)F	[M+H]+	189.2065021	Lipids and lipid-like molecules	drugCCS_ac7b01709_si_003.csv
5743	C[C@@H]1C[C@H]2[C@@H]3CCC4=CC(=O)C=C[C@@]4([C@]3([C@H](C[C@@]2([C@]1(C(=O)CO)O)C)O)F)C	[M+H]+	187.9187196	Lipids and lipid-like molecules	drugCCS_ac7b01709_si_003.csv
16961	C[C@@H]1C[C@H]2[C@@H]3CCC4=CC(=O)C=C[C@@]4([C@]3([C@H](C[C@@]2([C@]1(C(=O)COP(=O)([O-])[O-])O)C)O)F)C.[Na+].[Na+]	[M+H]+	200.623319	Lipids and lipid-like molecules	drugCCS_ac7b01709_si_003.csv
5311067	C[C@@H]1C[C@H]2[C@@H]3CCC4=CC(=O)C=C[C@@]4([C@]3([C@H](C[C@@]2([C@H]1C(=O)CO)C)O)F)C	[M+H]+	186.4496364	Lipids and lipid-like molecules	drugCCS_ac7b01709_si_003.csv
64740	C[C@@H]1CC(=O)[C@]2([C@@H](O1)O[C@@H]3[C@H]([C@@H]([C@@H]([C@@H]([C@H]3O2)NC)O)NC)O)O.Cl.Cl	[M+H]+	174.2883263	Organic oxygen compounds	drugCCS_ac7b01709_si_003.csv
441140	C[C@@H]1CC(=O)C=C([C@]12C(=O)C3=C(O2)C(=C(C=C3OC)OC)Cl)OC	[M+H]+	178.6279902	Organoheterocyclic compounds	drugCCS_ac7b01709_si_003.csv
101906	C[C@@H]1CC[C@@]2([C@H]([C@H]3[C@@H](O2)C[C@@H]4[C@@]3(C(=O)C[C@H]5[C@H]4CC[C@@H]6[C@@]5(CC[C@@H](C6)OC(=O)C)C)C)C)OC1	[M+H]+	223.4195652	Lipids and lipid-like molecules	drugCCS_ac7b01709_si_003.csv
91439	C[C@@H]1CC[C@@]2([C@H]([C@H]3[C@@H](O2)C[C@@H]4[C@@]3(CC[C@H]5[C@H]4CC[C@H]6[C@@]5(CC[C@@H](C6)O)C)C)C)OC1	[M+H]+	207.7139046	Lipids and lipid-like molecules	drugCCS_ac7b01709_si_003.csv
225766	C[C@@H]1CC[C@@]2([C@H]([C@H]3[C@@H](O2)C[C@@H]4[C@@]3(CC[C@H]5[C@H]4CC[C@H]6[C@@]5(CC[C@@H](C6)OC(=O)C)C)C)C)OC1	[M+H]+	222.05033	Lipids and lipid-like molecules	drugCCS_ac7b01709_si_003.csv
442985	C[C@@H]1CC[C@@]2([C@H]([C@H]3[C@@H](O2)C[C@@H]4[C@@]3(CC[C@H]5[C@H]4CC=C6[C@@]5(CC[C@@H](C6)O)C)C)C)NC1	[M+H]+	207.8181399	Lipids and lipid-like molecules	drugCCS_ac7b01709_si_003.csv
99474	C[C@@H]1CC[C@@]2([C@H]([C@H]3[C@@H](O2)C[C@@H]4[C@@]3(CC[C@H]5[C@H]4CC=C6[C@@]5(CC[C@@H](C6)O)C)C)C)OC1	[M+H]+	208.3739289	Lipids and lipid-like molecules	drugCCS_ac7b01709_si_003.csv
7061097	C[C@@H]1CC[C@@H]2[C@@]([C@@]13CC[C@](O3)(CCO)CO)(CC[C@@H]([C@@]2(C)CO)O)C	[M+H]+	171.1921313	Lipids and lipid-like molecules	drugCCS_ac7b01709_si_003.csv
65575	C[C@@H]1CC[C@@H]2[C@]13CC[C@@]([C@H](C3)C2(C)C)(C)O	[M+H]+	145.9421814	Lipids and lipid-like molecules	drugCCS_ac7b01709_si_003.csv
60605	C[C@@H]1CN(C[C@@H](N1)C)C2=C(C3=C(C(=C2F)F)C(=O)C(=CN3C4CC4)C(=O)O)F	[M+H]+	196.7380488	Organoheterocyclic compounds	drugCCS_ac7b01709_si_003.csv
38853	C[C@](CC1=CC(=C(C=C1)O)O)(C(=O)O)N	[M+H]+	147.553509	Organic acids and derivatives	drugCCS_ac7b01709_si_003.csv
34359	C[C@](CC1=CC(=C(C=C1)O)O)(C(=O)O)NN	[M+H]+	142.359911	Organic acids and derivatives	drugCCS_ac7b01709_si_003.csv
442534	C[C@]12C[C@@]3([C@@H]4C[C@]1([C@@]4([C@H](O2)O3)COC(=O)C5=CC=CC=C5)O[C@H]6[C@@H]([C@H]([C@@H]([C@H](O6)CO)O)O)O)O	[M-H]+	206.0344761	Organic oxygen compounds	drugCCS_ac7b01709_si_003.csv
6215	C[C@]12C[C@@H]([C@]3([C@H]([C@@H]1C[C@@H]4[C@]2(OC(O4)(C)C)C(=O)CO)C[C@@H](C5=CC(=O)C=C[C@@]53C)F)F)O	[M+H]+	199.6580488	Organoheterocyclic compounds	drugCCS_ac7b01709_si_003.csv
6436	C[C@]12C[C@@H]([C@]3([C@H]([C@@H]1C[C@@H]4[C@]2(OC(O4)(C)C)C(=O)CO)CCC5=CC(=O)C=C[C@@]53C)F)O	[M+H]+	197.0660098	Organoheterocyclic compounds	drugCCS_ac7b01709_si_003.csv
31307	C[C@]12C[C@@H]([C@]3([C@H]([C@@H]1C[C@H]([C@@]2(C(=O)CO)O)O)CCC4=CC(=O)C=C[C@@]43C)F)O	[M+H]+	186.7628606	Lipids and lipid-like molecules	drugCCS_ac7b01709_si_003.csv
82153	C[C@]12C[C@@H]([C@H]3[C@H]([C@@H]1C[C@@H]4[C@]2(OC(O4)(C)C)C(=O)CO)C[C@@H](C5=CC(=O)C=C[C@]35C)F)O	[M+H]+	199.8097568	Lipids and lipid-like molecules	drugCCS_ac7b01709_si_003.csv
5311066	C[C@]12C[C@@H]([C@H]3[C@H]([C@@H]1C[C@@H]4[C@]2(OC(O4)(C)C)C(=O)CO)CCC5=CC(=O)C=C[C@]35C)O	[M+H]+	198.5410329	Lipids and lipid-like molecules	drugCCS_ac7b01709_si_003.csv
5755	C[C@]12C[C@@H]([C@H]3[C@H]([C@@H]1CC[C@@]2(C(=O)CO)O)CCC4=CC(=O)C=C[C@]34C)O	[M+H]+	183.6620865	Lipids and lipid-like molecules	drugCCS_ac7b01709_si_003.csv
656804	C[C@]12C[C@@H]([C@H]3[C@H]([C@@H]1CC[C@@]2(C(=O)COC(=O)CCC(=O)O)O)CCC4=CC(=O)C=C[C@]34C)O	[M+H]+	210.260263	Lipids and lipid-like molecules	drugCCS_ac7b01709_si_003.csv
441409	C[C@]12C[C@@H]([C@H]3[C@H]([C@@H]1CC[C@@]2(C(=O)COP(=O)([O-])[O-])O)CCC4=CC(=O)C=C[C@]34C)O.[Na+].[Na+]	[M+H]+	197.7708212	Lipids and lipid-like molecules	drugCCS_ac7b01709_si_003.csv
10041070	C[C@]12C=CC3=C4CCC(=O)C=C4CC[C@H]3[C@@H]1CC[C@]2(CC=C)O	[M+H]+	176.9544732	Lipids and lipid-like molecules	drugCCS_ac7b01709_si_003.csv
5865	C[C@]12CC(=O)[C@H]3[C@H]([C@@H]1CC[C@@]2(C(=O)CO)O)CCC4=CC(=O)C=C[C@]34C	[M+H]+	181.7513473	Lipids and lipid-like molecules	drugCCS_ac7b01709_si_003.csv
15478	C[C@]12CC[C@@H](C[C@H]1CC[C@@H]3[C@@H]2C[C@H]([C@]4([C@@]3(CC[C@@H]4C5=CC(=O)OC5)O)C)O)O	[M+H]+	195.0800392	Lipids and lipid-like molecules	drugCCS_ac7b01709_si_003.csv
10114	C[C@]12CC[C@](C[C@H]1C3=CC(=O)[C@@H]4[C@]5(CC[C@@H](C([C@@H]5CC[C@]4([C@@]3(CC2)C)C)(C)C)O)C)(C)C(=O)O	[M+H]+	213.8814993	Lipids and lipid-like molecules	drugCCS_ac7b01709_si_003.csv
62074	C[C@]12CC[C@](C[C@H]1C3=CC(=O)[C@@H]4[C@]5(CC[C@@H](C([C@@H]5CC[C@]4([C@@]3(CC2)C)C)(C)C)O[C@@H]6[C@@H]([C@H]([C@@H]([C@H](O6)C(=O)O)O)O)O[C@H]7[C@@H]([C@H]([C@@H]([C@H](O7)C(=O)O)O)O)O)C)(C)C(=O)O.N	[M+H]+	284.9413673	Organic oxygen compounds	drugCCS_ac7b01709_si_003.csv
636402	C[C@]12CC[C@](C[C@H]1C3=CC(=O)[C@@H]4[C@]5(CC[C@@H](C([C@@H]5CC[C@]4([C@@]3(CC2)C)C)(C)C)OC(=O)CCC(=O)[O-])C)(C)C(=O)[O-].[Na+].[Na+]	[M+H]+	241.017257	Lipids and lipid-like molecules	drugCCS_ac7b01709_si_003.csv
6708760	C[C@]12CC[C@H](C[C@H]1CCC3=CC=CC=C23)O	[M+H]+	140.4425815	Benzenoids	drugCCS_ac7b01709_si_003.csv
68929	C[C@]12CC[C@H]3[C@H]([C@@H]1C[C@@H]([C@@H]2O)O)CCC4=C3C=CC(=C4)O	[M+H]+	153.5729886	Benzenoids	drugCCS_ac7b01709_si_003.csv
57363	C[C@]12CC[C@H]3[C@H]([C@@H]1CC[C@@H]2C(=O)NC(C)(C)C)CC[C@@H]4[C@@]3(C=CC(=O)N4)C	[M+H]+	200.0114685	Lipids and lipid-like molecules	drugCCS_ac7b01709_si_003.csv
6013	C[C@]12CC[C@H]3[C@H]([C@@H]1CC[C@@H]2O)CCC4=CC(=O)CC[C@]34C	[M+H]+	170.6209038	Lipids and lipid-like molecules	drugCCS_ac7b01709_si_003.csv
6231	C[C@]12CC[C@H]3[C@H]([C@@H]1CC[C@]2(C#C)O)CCC4=C3CCC(=O)C4	[M+H]+	174.6430803	Lipids and lipid-like molecules	drugCCS_ac7b01709_si_003.csv
6230	C[C@]12CC[C@H]3[C@H]([C@@H]1CC[C@]2(C#C)O)CCC4=CC(=O)CC[C@H]34	[M+H]+	174.3759321	Lipids and lipid-like molecules	drugCCS_ac7b01709_si_003.csv
10204	C[C@]12CC[C@H]3[C@H]([C@@H]1CC[C@H]2O)CCC4=CC(=O)CC[C@]34C	[M+H]+	170.707546	Lipids and lipid-like molecules	drugCCS_ac7b01709_si_003.csv
60198	C[C@]12CC[C@H]3[C@H]([C@@H]1CCC2=O)CC(=C)C4=CC(=O)C=C[C@]34C	[M+H]+	171.1047834	Lipids and lipid-like molecules	drugCCS_ac7b01709_si_003.csv
13472	C[C@]12CC[C@H]3[C@H]([C@@H]1CCC2=O)CCC4=CC(=O)C=C[C@]34C	[M+H]+	168.414483	Lipids and lipid-like molecules	drugCCS_ac7b01709_si_003.csv
6185	C[C@]12CC[C@H]3[C@H]([C@]1(CC[C@@H]2C4=CC(=O)OC4)O)CC[C@]5([C@@]3(CC[C@@H](C5)O)C=O)O	[M+H]+	196.6947491	Lipids and lipid-like molecules	drugCCS_ac7b01709_si_003.csv
5459840	C[C@]12CC[C@H]3C(=CC(=O)[C@H]4[C@@]3(C[C@@H]([C@@H](C4)O)O)C)[C@@]1(CC[C@@H]2[C@](C)([C@@H](CCC(C)(C)O)O)O)O	[M+H]+	221.262817	Lipids and lipid-like molecules	drugCCS_ac7b01709_si_003.csv
15209	C[C@]12CCC(=O)C=C1[C@H](C[C@@H]3[C@@H]2[C@H](C[C@]4([C@H]3C[C@@H]5[C@]4(OC(O5)(C)C)C(=O)CO)C)O)F	[M+H]+	201.1756326	Lipids and lipid-like molecules	drugCCS_ac7b01709_si_003.csv
13789	C[C@]12CCC(=O)C=C1C=C[C@@H]3[C@@H]2CC[C@]4([C@H]3CC[C@@]45CCC(=O)O5)C	[M+H]+	183.0311318	Lipids and lipid-like molecules	drugCCS_ac7b01709_si_003.csv
23682215	C[C@]12CCC(=O)C=C1C=CC3C2CC[C@]4(C3CC[C@]4(CCC(=O)[O-])O)C.[K+]	[M+H]+	187.8330636	Lipids and lipid-like molecules	drugCCS_ac7b01709_si_003.csv
443943	C[C@]12CCC(=O)C=C1CC[C@@H]3[C@@]2([C@H](C[C@]4([C@H]3C[C@@H]5[C@]4(OC(O5)(C)C)C(=O)CCl)C)O)F	[M+H]+	200.8789541	Lipids and lipid-like molecules	drugCCS_ac7b01709_si_003.csv
5754	C[C@]12CCC(=O)C=C1CC[C@@H]3[C@@H]2[C@H](C[C@]4([C@H]3CC[C@@]4(C(=O)CO)O)C)O	[M+H]+	185.0507325	Lipids and lipid-like molecules	drugCCS_ac7b01709_si_003.csv
16623	C[C@]12CCC(=O)C=C1CC[C@@H]3[C@@H]2[C@H](C[C@]4([C@H]3CC[C@@]4(C(=O)COC(=O)CCC(=O)O)O)C)O	[M+H]+	212.3801825	Lipids and lipid-like molecules	drugCCS_ac7b01709_si_003.csv
222786	C[C@]12CCC(=O)C=C1CC[C@@H]3[C@@H]2C(=O)C[C@]4([C@H]3CC[C@@]4(C(=O)CO)O)C	[M+H]+	184.4489044	Lipids and lipid-like molecules	drugCCS_ac7b01709_si_003.csv
6436903	C[C@H](/C=C/[C@H](C)C(C)C)[C@H]1CC[C@@H]2[C@@]1(CC[C@H]3C2=CC=C4[C@@]3(CC[C@@H](C4)OC(=O)C)C)C	[M+H]+	223.3776866	Lipids and lipid-like molecules	drugCCS_ac7b01709_si_003.csv
446596	C[C@H]([C@H]1[C@@H](O1)C[C@H]2CO[C@H]([C@@H]([C@@H]2O)O)C/C(=C/C(=O)OCCCCCCCCC(=O)O)/C)[C@H](C)O	[M+H]+	214.781255	Lipids and lipid-like molecules	drugCCS_ac7b01709_si_003.csv
821428	C[C@H](C1=CC=C(C=C1)OC)C(=O)C2=C(C=C(C=C2)O)O	[M+H]+	161.9860765	Benzenoids	drugCCS_ac7b01709_si_003.csv
26758	C[C@H](CC1=CC=CC=C1)N(C)CC#C.Cl	[M+H]+	140.99999	Benzenoids	drugCCS_ac7b01709_si_003.csv
10140	C[C@H](CCC(=O)NCC(=O)O)[C@H]1CC[C@@H]2[C@@]1([C@H](C[C@H]3[C@H]2[C@@H](C[C@H]4[C@@]3(CC[C@H](C4)O)C)O)O)C	[M+H]+	205.2281725	Lipids and lipid-like molecules	drugCCS_ac7b01709_si_003.csv
9903	C[C@H](CCC(=O)O)[C@H]1CC[C@@H]2[C@@]1(CC[C@H]3[C@H]2CC[C@H]4[C@@]3(CC[C@H](C4)O)C)C	[M+H]+	210.7787574	Lipids and lipid-like molecules	drugCCS_ac7b01709_si_003.csv
92803	C[C@H](CCC(=O)O)[C@H]1CC[C@@H]2[C@@]1(CC[C@H]3[C@H]2CC[C@H]4[C@@]3(CCCC4)C)C	[M+H]+	169.2998762	Lipids and lipid-like molecules	drugCCS_ac7b01709_si_003.csv
91474	C[C@H](CCCC(C)C)[C@H]1CC[C@@H]2[C@@]1(CC[C@H]3[C@H]2C(=O)C=C4[C@@]3(CC[C@@H](C4)O)C)C	[M+H]+	208.3067425	Lipids and lipid-like molecules	drugCCS_ac7b01709_si_003.csv
3034666	C[C@H](CCCC(C)C)[C@H]1CC[C@@H]2[C@@]1(CC[C@H]3[C@H]2C=CC4=CC(=O)CC[C@]34C)C	[M+H]+	208.3184636	Lipids and lipid-like molecules	drugCCS_ac7b01709_si_003.csv
5997	C[C@H](CCCC(C)C)[C@H]1CC[C@@H]2[C@@]1(CC[C@H]3[C@H]2CC=C4[C@@]3(CC[C@@H](C4)O)C)C	[M+H]+	204.6101231	Lipids and lipid-like molecules	drugCCS_ac7b01709_si_003.csv
9908107	C[C@H](CCCC(C)C)[C@H]1CC[C@@H]2[C@@]1(CC[C@H]3[C@H]2CC=C4[C@@]3(CCC(=O)C4)C)C	[M+H]+	211.354714	Lipids and lipid-like molecules	drugCCS_ac7b01709_si_003.csv
3032818	C[C@H](CO)C1=CC2=C(C=C1)C=C(C=C2)OC	[M+H]+	140.0197542	Benzenoids	drugCCS_ac7b01709_si_003.csv
44093	C[C@H](CS)C(=O)N1CCC[C@H]1C(=O)O	[M-H]+	141.4032671	Organic acids and derivatives	drugCCS_ac7b01709_si_003.csv
135398735	C[C@H]1/C=C/C=C(\C(=O)NC2=C(C(=C3C(=C2O)C(=C(C4=C3C(=O)[C@](O4)(O/C=C/[C@@H]([C@H]([C@H]([C@@H]([C@@H]([C@@H]([C@H]1O)C)O)C)OC(=O)C)C)OC)C)C)O)O)/C=N/N5CCN(CC5)C)/C	[M+H]+	280.2859875	Organoheterocyclic compounds	drugCCS_ac7b01709_si_003.csv
6436173	C[C@H]1/C=C/C=C(\C(=O)NC2=C(C3=C(C4=C(C(=C3O)C)O[C@@](C4=O)(O/C=C/[C@@H]([C@H]([C@H]([C@@H]([C@@H]([C@@H]([C@H]1O)C)O)C)OC(=O)C)C)OC)C)C5=C2N6C=CC(=CC6=N5)C)O)/C	[M+H]+	267.8338351	Organoheterocyclic compounds	drugCCS_ac7b01709_si_003.csv
12314120	C[C@H]1[C@@H]([C@H]([C@@H]([C@@H](O1)O[C@H]2CC[C@]3([C@@H](C2)CC[C@@H]4[C@@H]3CC[C@]5([C@@]4(CC[C@@H]5C6=CC(=O)OC6)O)C)C=O)O)OC)O	[M+H]+	239.3788814	Organic oxygen compounds	drugCCS_ac7b01709_si_003.csv
5282150	C[C@H]1[C@@H]([C@H]([C@H]([C@@H](O1)O[C@@H]2[C@H]([C@@H]([C@H](O[C@H]2OC3=CC(=C4C(=C3)OC(=CC4=O)C5=CC=C(C=C5)O)O)CO)O)O)O)O)O	[M+H]+	231.9428114	Organoheterocyclic compounds	drugCCS_ac7b01709_si_003.csv
11491905	C[C@H]1[C@@H]([C@H]([C@H]([C@@H](O1)O[C@@H]2[C@H](O[C@H]([C@@H]([C@H]2O)O)OC[C@@H]3[C@H]([C@@H]([C@H]([C@@H](O3)OC(=O)[C@@]45CC[C@@]6(C(=CC[C@H]7[C@]6(CC[C@@H]8[C@@]7(CC[C@@H]([C@@]8(C)CO)O[C@H]9[C@@H]([C@H]([C@H](CO9)O)O)O[C@H]1[C@@H]([C@@H]([C@H]([C@@H](O1)C)O)O)O)C)C)[C@@H]4CC(CC5)(C)C)C)O)O)O)CO)O)O)O	[M+H]+	349.1096548	Organic oxygen compounds	drugCCS_ac7b01709_si_003.csv
439501	C[C@H]1[C@@H]([C@H]([C@H]([C@@H](O1)O[C@H]2C[C@H]([C@@]3([C@@H]4[C@@H](CC[C@@]3(C2)O)[C@]5(CC[C@@H]([C@]5(C[C@H]4O)C)C6=CC(=O)OC6)O)CO)O)O)O)O	[M+H]+	233.9620506	Lipids and lipid-like molecules	drugCCS_ac7b01709_si_003.csv
441852	C[C@H]1[C@@H]([C@H]([C@H]([C@@H](O1)O[C@H]2CC[C@@]3([C@H]4CC[C@@]5([C@H](CC[C@@]5([C@@H]4CC[C@@]3(C2)O)O)C6=CC(=O)OC6)C)C=O)O)O)O	[M+H]+	238.0594101	Lipids and lipid-like molecules	drugCCS_ac7b01709_si_003.csv
168849	C[C@H]1[C@@H]([C@H]([C@H]([C@@H](O1)OC[C@@H]2[C@H]([C@@H]([C@H]([C@@H](O2)OC3=C(C(=C4C(=C3)OC(=CC4=O)C5=CC=C(C=C5)OC)O)OC)O)O)O)O)O)O	[M+H]+	236.5031768	Organoheterocyclic compounds	drugCCS_ac7b01709_si_003.csv
5486699	C[C@H]1[C@@H]([C@H]([C@H]([C@@H](O1)OC[C@@H]2[C@H]([C@@H]([C@H]([C@@H](O2)OC3=C(OC4=CC(=CC(=C4C3=O)O)OCCO)C5=CC(=C(C=C5)OCCO)OCCO)O)O)O)O)O)O	[M+H]+	258.9610794	Organoheterocyclic compounds	drugCCS_ac7b01709_si_003.csv
5281613	C[C@H]1[C@@H]([C@H]([C@H]([C@@H](O1)OC[C@@H]2[C@H]([C@@H]([C@H]([C@@H](O2)OC3=CC(=C4C(=C3)OC(=CC4=O)C5=CC(=C(C=C5)OC)O)O)O)O)O)O)O)O	[M+H]+	242.482005	Organoheterocyclic compounds	drugCCS_ac7b01709_si_003.csv
6728944	C[C@H]1[C@@H]([C@H]([C@H]([C@@H](O1)OC[C@@H]2[C@H]([C@@H]([C@H](C(O2)OC3=C(OC4=CC(=CC(=C4C3=O)O)O)C5=CC(=C(C=C5)O)O)O)O)O)O)O)O	[M+H]+	230.7212403	Organoheterocyclic compounds	drugCCS_ac7b01709_si_003.csv
5318997	C[C@H]1[C@@H]([C@H]([C@H]([C@@H](O1)OC2=C(OC3=C(C2=O)C(=CC(=C3CC=C(C)C)O[C@H]4[C@@H]([C@H]([C@@H]([C@H](O4)CO)O)O)O)O)C5=CC=C(C=C5)OC)O)O)O	[M+H]+	260.8376698	Organoheterocyclic compounds	drugCCS_ac7b01709_si_003.csv
65348	C[C@H]1[C@@H]([C@H](C[C@@H](O1)O[C@H]2C[C@@](CC3=C2C(=C4C(=C3O)C(=O)C5=C(C4=O)C(=CC=C5)OC)O)(C(=O)CO)O)N)O.Cl	[M+H]+	225.197959	Organoheterocyclic compounds	drugCCS_ac7b01709_si_003.csv
5742832	C[C@H]1[C@@H](C(=O)N1S(=O)(=O)O)NC(=O)/C(=N\OC(C)(C)C(=O)O)/C2=CSC(=N2)N	[M+H]+	197.3950529	Organoheterocyclic compounds	drugCCS_ac7b01709_si_003.csv
221071	C[C@H]1[C@@H]2CC[C@]3(C=CC(=O)C(=C3[C@H]2OC1=O)C)C	[M+H]+	154.892603	Lipids and lipid-like molecules	drugCCS_ac7b01709_si_003.csv
167683	C[C@H]1[C@@H]2CCC(=C3[C@@H]([C@H]2OC1=O)C(=CC3=O)C)C	[M+H]+	154.2108142	Lipids and lipid-like molecules	drugCCS_ac7b01709_si_003.csv
30323	C[C@H]1[C@H]([C@H](C[C@@H](O1)O[C@H]2C[C@@](CC3=C2C(=C4C(=C3O)C(=O)C5=C(C4=O)C(=CC=C5)OC)O)(C(=O)C)O)N)O	[M+H]+	222.9331452	Organoheterocyclic compounds	drugCCS_ac7b01709_si_003.csv
31703	C[C@H]1[C@H]([C@H](C[C@@H](O1)O[C@H]2C[C@@](CC3=C2C(=C4C(=C3O)C(=O)C5=C(C4=O)C(=CC=C5)OC)O)(C(=O)CO)O)N)O	[M+H]+	226.977211	Organoheterocyclic compounds	drugCCS_ac7b01709_si_003.csv
441082	C[C@H]1[C@H]2CC[C@@H]3[C@@]2(CC[C@H]4[C@H]3CC=C5[C@@]4(CC[C@@H](C5)N(C)C)C)CN1C	[M+H]+	195.3919099	Lipids and lipid-like molecules	drugCCS_ac7b01709_si_003.csv
3000706	C[C@H]1C(=O)N[C@H](C(=O)O[C@@H](C(=O)N[C@@H](C(=O)O[C@H](C(=O)N[C@H](C(=O)O[C@@H](C(=O)N[C@@H](C(=O)O[C@H](C(=O)N[C@H](C(=O)O[C@@H](C(=O)N[C@@H](C(=O)O1)C(C)C)C(C)C)C(C)C)C)C(C)C)C(C)C)C(C)C)C)C(C)C)C(C)C)C(C)C	[M+H]+	327.3845435	Lipids and lipid-like molecules	drugCCS_ac7b01709_si_003.csv
9415	C[C@H]1C(=O)O[C@@H]2CCN3[C@@H]2C(=CC3)COC(=O)[C@]([C@]1(C)O)(C)O	[M+H]+	172.947928	Organoheterocyclic compounds	drugCCS_ac7b01709_si_003.csv
6279	C[C@H]1C[C@@H]2[C@H](CC[C@]3([C@H]2CC[C@@]3(C(=O)C)OC(=O)C)C)[C@@]4(C1=CC(=O)CC4)C	[M+H]+	197.1948042	Lipids and lipid-like molecules	drugCCS_ac7b01709_si_003.csv
71414	C[C@H]1C[C@H]2[C@@H]3C[C@@H](C4=CC(=O)C=C[C@@]4([C@]3([C@H](C[C@@]2([C@]1(C(=O)COC(=O)C)OC(=O)C)C)O)F)C)F	[M+H]+	209.4674604	Organoheterocyclic compounds	drugCCS_ac7b01709_si_003.csv
6741	C[C@H]1C[C@H]2[C@@H]3CC[C@@]([C@]3(C[C@@H]([C@@H]2[C@@]4(C1=CC(=O)C=C4)C)O)C)(C(=O)CO)O	[M+H]+	187.6564908	Lipids and lipid-like molecules	drugCCS_ac7b01709_si_003.csv
23680530	C[C@H]1C[C@H]2[C@@H]3CC[C@@]([C@]3(C[C@@H]([C@@H]2[C@@]4(C1=CC(=O)C=C4)C)O)C)(C(=O)COC(=O)CCC(=O)[O-])O.[Na+]	[M+H]+	214.576046	Lipids and lipid-like molecules	drugCCS_ac7b01709_si_003.csv
247839	C[C@H]1C[C@H]2[C@@H]3CC[C@@H]([C@]3(C[C@@H]([C@@H]2[C@@]4(C1=CC(=O)CC4)C)O)C)C(=O)C	[M+H]+	183.1597761	Lipids and lipid-like molecules	drugCCS_ac7b01709_si_003.csv
9782	C[C@H]1C[C@H]2[C@@H]3CCC4=CC(=O)C=C[C@@]4([C@]3([C@H](C[C@@]2([C@]1(C(=O)CO)O)C)O)F)C	[M+H]+	186.7302695	Lipids and lipid-like molecules	drugCCS_ac7b01709_si_003.csv
6419979	C[C@H]1C2=CC(=C(C=C2CCN1)O)O.Br	[M+H]+	141.1247178	Organoheterocyclic compounds	drugCCS_ac7b01709_si_003.csv
9578507	C[C@H]1CC[C@]2(C[C@@H]3C[C@H](O2)C/C=C(/[C@H]([C@H](/C=C/C=C/4\CO[C@H]\5[C@@]4([C@@H](C=C(/C5=N/O)C)C(=O)O3)O)C)O[C@H]6C[C@@H]([C@H]([C@@H](O6)C)O)OC)\C)O[C@@H]1C7CCCCC7	[M+H]+	293.1653751	Organoheterocyclic compounds	drugCCS_ac7b01709_si_003.csv
227829	C[C@H]1CC[C@H](CC2=C1CC[C@@H]2C)C(C)(C)O	[M+H]+	146.3252498	Lipids and lipid-like molecules	drugCCS_ac7b01709_si_003.csv
98042566	C[C@H]1CC2C3CCC4=CC(=O)C=C[C@@]4([C@]3([C@H](C[C@@]2([C@]1(C(=O)COP(=O)([O-])[O-])O)C)O)F)C	[M+H]+	201.1028913	Lipids and lipid-like molecules	drugCCS_ac7b01709_si_003.csv
72724	C[C@H]1CCC[C@]2(C1=C[C@H]3[C@@H](C2)OC(=O)C3=C)C	[M+H]+	149.4518926	Lipids and lipid-like molecules	drugCCS_ac7b01709_si_003.csv
11425923	C[C@H]1COC2=C1C(=O)C(=O)C3=C2C=CC4=C(C=CC=C43)C	[M+H]+	159.3596108	Organoheterocyclic compounds	drugCCS_ac7b01709_si_003.csv
160254	C[C@H]1COC2=C1C(=O)C(=O)C3=C2C=CC4=C3CCCC4(C)C	[M+H]+	167.9574077	Organoheterocyclic compounds	drugCCS_ac7b01709_si_003.csv
149096	C[C@H]1COC2=C3N1C=C(C(=O)C3=CC(=C2N4CCN(CC4)C)F)C(=O)O	[M+H]+	188.486901	Organoheterocyclic compounds	drugCCS_ac7b01709_si_003.csv
10917	C[N+](C)(C)C[C@@H](CC(=O)[O-])O	[M+H]+	132.8546059	Organic acids and derivatives	drugCCS_ac7b01709_si_003.csv
11545	C[N+](C)(C)CC(=O)O.[Cl-]	[M+H]+	122.4990456	Organic acids and derivatives	drugCCS_ac7b01709_si_003.csv
5970	C[N+](C)(C)CC(CC(=O)O)O.[Cl-]	[M+H]+	132.9242542	Organic acids and derivatives	drugCCS_ac7b01709_si_003.csv
6209	C[N+](C)(C)CCO.[Cl-]	M+	121.0140042	Organic acids and derivatives	drugCCS_ac7b01709_si_003.csv
5831	C[N+](C)(C)CCOC(=O)N.[Cl-]	[M+H]+	128.0357281	Organic acids and derivatives	drugCCS_ac7b01709_si_003.csv
19667	C[N+](C)(CCOC1=CC=CC=C1)CC2=CC=CC=C2	[M+H]+	162.3220657	Benzenoids	drugCCS_ac7b01709_si_003.csv
5459110	C[N+]1([C@@H]2CC(C[C@H]1[C@H]3[C@@H]2O3)OC(=O)[C@H](CO)C4=CC=CC=C4)C.[Br-]	[M+H]+	172.7529664	Organoheterocyclic compounds	drugCCS_ac7b01709_si_003.csv
10429215	C[N+]1([C@@H]2CC[C@H]1CC(C2)OC(=O)C(C3=CC=CC=C3)O)C.[Br-]	[M]+	167.0286024	Benzenoids	drugCCS_ac7b01709_si_003.csv
3000668	C[N+]1([C@@H]2CC[C@H]1CC(C2)OC(=O)C(CO)C3=CC=CC=C3)[O-]	[M+H]+	172.3812876	Organoheterocyclic compounds	drugCCS_ac7b01709_si_003.csv
657381	C[N+]1([C@@H]2CC[C@H]1CC(C2)OC(=O)C(CO)C3=CC=CC=C3)C.[N+](=O)([O-])[O-]	[M+H]+	172.5270753	Organoheterocyclic compounds	drugCCS_ac7b01709_si_003.csv
11693	C[N+]1(CCC(C1)OC(=O)C(C2CCCC2)(C3=CC=CC=C3)O)C.[Br-]	[M+H]+	203.8274092	Organoheterocyclic compounds	drugCCS_ac7b01709_si_003.csv
6461	C[N+]1(CCCC(C1)OC(=O)C(C2=CC=CC=C2)(C3=CC=CC=C3)O)C.[Br-]	[M+H]+	180.7276812	Benzenoids	drugCCS_ac7b01709_si_003.csv
9399	C[N+]1(CCOC(C1)(C2=CC=C(C=C2)C3=CC=C(C=C3)C4(C[N+](CCO4)(C)C)O)O)C.[Br-].[Br-]	[M]+	221.7071329	Benzenoids	drugCCS_ac7b01709_si_003.csv
13394149	C[N+]1=C2C(=C3C=CC4=C(C3=C1)OCO4)C=CC5=CC6=C(C=C52)OCO6.OS(=O)(=O)[O-]	[M+H]+	167.906996	Organoheterocyclic compounds	drugCCS_ac7b01709_si_003.csv
6842	C[N+]1=C2C=C(C=CC2=CC3=C1C=C(C=C3)N)N.[Cl-]	[M+H]+	146.3215744	Organoheterocyclic compounds	drugCCS_ac7b01709_si_003.csv
5570	C[N+]1=CC=CC(=C1)C(=O)[O-]	[M+H]+	122.373463	Organoheterocyclic compounds	drugCCS_ac7b01709_si_003.csv
7550	C[N+]1=CC=CC(=C1)OC(=O)N(C)C.[Br-]	[M+H]+	137.2307873	Organoheterocyclic compounds	drugCCS_ac7b01709_si_003.csv
135445761	C[N+]1=CC=CC=C1/C=N/O.[Cl-]	[M]+	122.6227844	Organoheterocyclic compounds	drugCCS_ac7b01709_si_003.csv
160908	C[N+]1=CC2=C(C3=C(C=C2CC1)OCO3)OC.[Cl-]	[M+H]+	143.3972676	Organoheterocyclic compounds	drugCCS_ac7b01709_si_003.csv
45934200	C[N+]12CC[C@@]34C1C[C@@H]5[C@@H]6C3N(C(=O)CC6OCC=C5C2)C7=CC=CC=C47	[M]+	175.193889	Organoheterocyclic compounds	drugCCS_ac7b01709_si_003.csv
19004	C[N+]12CCC(CC1)C(C2)OC(=O)C(C3=CC=CC=C3)(C4=CC=CC=C4)O.[Br-]	[M+H]+	183.2766012	Benzenoids	drugCCS_ac7b01709_si_003.csv
90454	C=C[C@H]1CN2CC[C@H]1C[C@@H]2[C@H](C3=CC=NC4=CC=CC=C34)O	[M+H]+	166.2759897	Organoheterocyclic compounds	drugCCS_ac7b01709_si_003.csv
101744	C=C[C@H]1CN2CC[C@H]1C[C@H]2[C@@H](C3=CC=NC4=CC=CC=C34)O	[M+H]+	168.1718547	Organoheterocyclic compounds	drugCCS_ac7b01709_si_003.csv
3015195	C=CC(C1=CC=CC=C1)C2=CC(=O)C=CC2=O	[M+H]+	143.5847167	Organoheterocyclic compounds	drugCCS_ac7b01709_si_003.csv
6915944	C=CC1=C(N2[C@@H]([C@@H](C2=O)NC(=O)/C(=N\O)/C3=CSC(=N3)N)SC1)C(=O)O	[M+H]+	190.5075447	Organoheterocyclic compounds	drugCCS_ac7b01709_si_003.csv
5144	C=CCC1=CC2=C(C=C1)OCO2	[M+H]+	138.5726196	Benzenoids	drugCCS_ac7b01709_si_003.csv
5464092	C=CCN1CC[C@]23[C@@H]4C(=O)CC[C@]2([C@H]1CC5=C3C(=C(C=C5)O)O4)O.Cl	[M+H]+	170.8811	Organoheterocyclic compounds	drugCCS_ac7b01709_si_003.csv
37175	C=CCOC(CN1C=CN=C1)C2=C(C=C(C=C2)Cl)Cl	[M+H]+	165.2312921	Organoheterocyclic compounds	drugCCS_ac7b01709_si_003.csv
2122	C=CCSCC1NC2=CC(=C(C=C2S(=O)(=O)N1)S(=O)(=O)N)Cl	[M+H]+	181.5018218	Organoheterocyclic compounds	drugCCS_ac7b01709_si_003.csv
16315	C=CCSSSCC=C	[M+H]+	126.9313359	Organic acids and derivatives	drugCCS_ac7b01709_si_003.csv
8371	C1(=C(C(=O)C(=C(C1=O)Cl)Cl)Cl)Cl	[M+H]+	148.9177696	Organic acids and derivatives	drugCCS_ac7b01709_si_003.csv
16230	C1(=C(N=C(C(=N1)Cl)N)N)C(=O)N=C(N)N.Cl	[M+H]+	145.6906753	Organoheterocyclic compounds	drugCCS_ac7b01709_si_003.csv
5280746	C1[C@@]([C@H]([C@@H](O1)O[C@@H]2[C@H]([C@@H]([C@H](O[C@H]2OC3=CC(=C4C(=C3)OC(=CC4=O)C5=CC=C(C=C5)O)O)CO)O)O)O)(CO)O	[M+H]+	229.2596019	Organoheterocyclic compounds	drugCCS_ac7b01709_si_003.csv
441314	C1[C@@H]([C@H]([C@@H]([C@H](N1CCO)CO)O)O)O	[M+H]+	141.0488641	Organic oxygen compounds	drugCCS_ac7b01709_si_003.csv
13730	C1[C@@H]([C@H](O[C@H]1N2C=NC3=C(N=CN=C32)N)CO)O	[M+H]+	154.5721382	Organoheterocyclic compounds	drugCCS_ac7b01709_si_003.csv
441374	C1[C@H]([C@@H]([C@H]([C@@H]([C@H]1N)O[C@@H]2[C@@H]([C@H]([C@@H]([C@H](O2)CN)O)O)O)O)O[C@@H]3[C@@H]([C@H]([C@@H]([C@H](O3)CO)O)N)O)N.OS(=O)(=O)O	[M+H]+	221.0764212	Organic oxygen compounds	drugCCS_ac7b01709_si_003.csv
25267092	C1[C@H]([C@@H]1N)C2=CC=CC=C2.C1[C@H]([C@@H]1N)C2=CC=CC=C2.OS(=O)(=O)O	[M+H]+	127.2024065	Benzenoids	drugCCS_ac7b01709_si_003.csv
6883	C1[C@H]([C@@H]2[C@H](O1)[C@H](CO2)O[N+](=O)[O-])O[N+](=O)[O-]	[M+H]+	151.5875843	Organic oxygen compounds	drugCCS_ac7b01709_si_003.csv
72277	C1[C@H]([C@H](OC2=CC(=CC(=C21)O)O)C3=CC(=C(C(=C3)O)O)O)O	[M+H]+	165.4611415	Organoheterocyclic compounds	drugCCS_ac7b01709_si_003.csv
65064	C1[C@H]([C@H](OC2=CC(=CC(=C21)O)O)C3=CC(=C(C(=C3)O)O)O)OC(=O)C4=CC(=C(C(=C4)O)O)O	[M+H]+	206.1341701	Organoheterocyclic compounds	drugCCS_ac7b01709_si_003.csv
72276	C1[C@H]([C@H](OC2=CC(=CC(=C21)O)O)C3=CC(=C(C=C3)O)O)O	[M+H]+	161.5419537	Organoheterocyclic compounds	drugCCS_ac7b01709_si_003.csv
107905	C1[C@H]([C@H](OC2=CC(=CC(=C21)O)O)C3=CC(=C(C=C3)O)O)OC(=O)C4=CC(=C(C(=C4)O)O)O	[M+H]+	202.9024601	Organoheterocyclic compounds	drugCCS_ac7b01709_si_003.csv
169167	C1[C@H]([C@H](OC2=CC(=CC(=C21)O)O)C3=CC(=C(C4=C(C(=O)C=C(C=C34)[C@@H]5[C@@H](CC6=C(C=C(C=C6O5)O)O)OC(=O)C7=CC(=C(C(=C7)O)O)O)O)O)O)O	[M+H]+	245.6828838	Organoheterocyclic compounds	drugCCS_ac7b01709_si_003.csv
467320	C1[C@H]([C@H](OC2=CC(=CC(=C21)O)O)C3=CC(=O)C(=C4C(=C3)C(=CC(=C4O)O)[C@@H]5[C@@H](CC6=C(C=C(C=C6O5)O)O)OC(=O)C7=CC(=C(C(=C7)O)O)O)O)OC(=O)C8=CC(=C(C(=C8)O)O)O	[M+H]+	268.3630209	Organoheterocyclic compounds	drugCCS_ac7b01709_si_003.csv
443639	C1[C@H]([C@H](OC2=CC(=CC(=C21)O)O)C3=CC=C(C=C3)O)O	[M+H]+	159.3813919	Organoheterocyclic compounds	drugCCS_ac7b01709_si_003.csv
135403798	C1[C@H]([C@H](OC2=CC(=CC(=C21)O)O)C3=CC4=C(C(=C(C=C4[C@@H]5[C@@H](CC6=C(C=C(C=C6O5)O)O)O)O)O)C(=O)C(=C3)O)O	[M+H]+	219.7919099	Organoheterocyclic compounds	drugCCS_ac7b01709_si_003.csv
171548	C1[C@H]2[C@@H]([C@@H](S1)CCCCC(=O)O)NC(=O)N2	[M+H]+	148.0443031	Organic oxygen compounds	drugCCS_ac7b01709_si_003.csv
101612	C1[C@H]2[C@H](CO[C@@H]2C3=CC4=C(C=C3)OCO4)[C@@H](O1)C5=CC6=C(C=C5)OCO6	[M+H]+	171.0049971	Organoheterocyclic compounds	drugCCS_ac7b01709_si_003.csv
10235	C1[C@H]2CNC[C@@H]1C3=CC=CC(=O)N3C2	[M+H]+	137.9317848	Organoheterocyclic compounds	drugCCS_ac7b01709_si_003.csv
370	C1=C(C=C(C(=C1O)O)O)C(=O)O	[M+H]+	130.892214	Benzenoids	drugCCS_ac7b01709_si_003.csv
5281672	C1=C(C=C(C(=C1O)O)O)C2=C(C(=O)C3=C(C=C(C=C3O2)O)O)O	[M+H]+	167.3281992	Benzenoids	drugCCS_ac7b01709_si_003.csv
5281701	C1=C(C=C(C(=C1O)O)O)C2=CC(=O)C3=C(C=C(C=C3O2)O)O	[M+H]+	163.3510487	Benzenoids	drugCCS_ac7b01709_si_003.csv
5781144	C1=C(C=C(C(=C1O)O)O)C2=COC3=C(C2=O)C(=C(C(=C3)O)O)O	[M+H]+	166.4984223	Organoheterocyclic compounds	drugCCS_ac7b01709_si_003.csv
2407	C1=C(C=C(C(=C1SC2=C(C(=CC(=C2)Cl)Cl)[O-])[O-])Cl)Cl	[M+H]+	170.7910312	Benzenoids	drugCCS_ac7b01709_si_003.csv
5702160	C1=C(N=C(S1)N=C(N)N)CSCC/C(=N/S(=O)(=O)N)/N	[M+H]+	167.1672126	Organic acids and derivatives	drugCCS_ac7b01709_si_003.csv
4139109	C1=C(NC=N1)CC(=O)[O-]	[M+H]+	120.7104692	Organic acids and derivatives	drugCCS_ac7b01709_si_003.csv
5818	C1=C(NC=N1)CCN.Cl.Cl	[M+H]+	120.2553726	Organic acids and derivatives	drugCCS_ac7b01709_si_003.csv
5447130	C1=C(OC(=C1)[N+](=O)[O-])/C=N/NC(=O)N	[M+H]+	138.6283683	Organoheterocyclic compounds	drugCCS_ac7b01709_si_003.csv
3840	C1=C(OC=C(C1=O)O)CO	[M+H]+	121.8702262	Benzenoids	drugCCS_ac7b01709_si_003.csv
1845	C1=C2C(=CC(=C1Cl)Cl)NC(=O)C(=O)N2	[M+H]+	142.9803008	Organoheterocyclic compounds	drugCCS_ac7b01709_si_003.csv
2720	C1=C2C(=CC(=C1Cl)S(=O)(=O)N)S(=O)(=O)N=CN2	[M+H]+	161.0374705	Organoheterocyclic compounds	drugCCS_ac7b01709_si_003.csv
5281647	C1=C2C(=CC(=C1O)O)OC3=C(C2=O)C(=C(C(=C3)O)[C@H]4[C@@H]([C@H]([C@@H]([C@H](O4)CO)O)O)O)O	[M+H]+	189.8179266	Organoheterocyclic compounds	drugCCS_ac7b01709_si_003.csv
3519	C1=CC(=C(C(=C1)Cl)CC(=O)N=C(N)N)Cl	[M+H]+	148.9266995	Benzenoids	drugCCS_ac7b01709_si_003.csv
3878	C1=CC(=C(C(=C1)Cl)Cl)C2=C(N=C(N=N2)N)N	[M+H]+	150.5543738	Organoheterocyclic compounds	drugCCS_ac7b01709_si_003.csv
47472	C1=CC(=C(C(=C1)Cl)SC(CCC2=CC=C(C=C2)Cl)CN3C=CN=C3)Cl	[M+H]+	186.5246961	Organoheterocyclic compounds	drugCCS_ac7b01709_si_003.csv
5104	C1=CC(=C(C=C1[As](=O)(O)O)[N+](=O)[O-])O	[M+H]+	145.5169621	Benzenoids	drugCCS_ac7b01709_si_003.csv
2259	C1=CC(=C(C=C1C(=C2C=CC(=O)C(=C2)C(=O)O)C3=CC(=C(C=C3)O)C(=O)O)C(=O)O)O	[M+H]+	197.5753722	Benzenoids	drugCCS_ac7b01709_si_003.csv
6047	C1=CC(=C(C=C1C[C@@H](C(=O)O)N)O)O	[M+H]+	145.4397258	Organic acids and derivatives	drugCCS_ac7b01709_si_003.csv
5281792	C1=CC(=C(C=C1C[C@H](C(=O)O)OC(=O)/C=C/C2=CC(=C(C=C2)O)O)O)O	[M+H]+	169.1570529	Benzenoids	drugCCS_ac7b01709_si_003.csv
5280343	C1=CC(=C(C=C1C2=C(C(=O)C3=C(C=C(C=C3O2)O)O)O)O)O	[M+H]+	163.4012345	Benzenoids	drugCCS_ac7b01709_si_003.csv
5280647	C1=CC(=C(C=C1C2=C(C(=O)C3=C(O2)C(=C(C=C3O)O)O)O)O)O	[M+H]+	165.9263049	Benzenoids	drugCCS_ac7b01709_si_003.csv
5281621	C1=CC(=C(C=C1C2=C(C(=O)C3=C(O2)C(=C(C=C3O)O)O[C@H]4[C@@H]([C@H]([C@@H]([C@H](O4)CO)O)O)O)O)O)O	[M+H]+	199.581141	Organoheterocyclic compounds	drugCCS_ac7b01709_si_003.csv
5281614	C1=CC(=C(C=C1C2=C(C(=O)C3=C(O2)C=C(C=C3)O)O)O)O	[M+H]+	160.7369279	Benzenoids	drugCCS_ac7b01709_si_003.csv
681	C1=CC(=C(C=C1CCN)O)O	[M+H]+	127.7238438	Benzenoids	drugCCS_ac7b01709_si_003.csv
3037	C1=CC(=C(C=C1Cl)CC2=C(C=CC(=C2)Cl)O)O	[M+H]+	147.4028013	Benzenoids	drugCCS_ac7b01709_si_003.csv
5482	C1=CC(=C(C=C1Cl)Cl)C(CN2C=CN=C2)OCC3=C(SC=C3)Cl	[M+H]+	180.7251306	Organoheterocyclic compounds	drugCCS_ac7b01709_si_003.csv
9556529	C1=CC(=C(C=C1Cl)Cl)CO/N=C(\CN2C=CN=C2)/C3=C(C=C(C=C3)Cl)Cl.[N+](=O)(O)[O-]	[M+H]+	193.0833514	Organoheterocyclic compounds	drugCCS_ac7b01709_si_003.csv
68553	C1=CC(=C(C=C1Cl)Cl)COC(CN2C=CN=C2)C3=C(C=C(C=C3)Cl)Cl.[N+](=O)(O)[O-]	[M+H]+	189.4273657	Organoheterocyclic compounds	drugCCS_ac7b01709_si_003.csv
3365	C1=CC(=C(C=C1F)F)C(CN2C=NC=N2)(CN3C=NC=N3)O	[M+H]+	163.3780458	Organoheterocyclic compounds	drugCCS_ac7b01709_si_003.csv
4075	C1=CC(=C(C=C1N)C(=O)O)O	[M+H]+	134.7221883	Benzenoids	drugCCS_ac7b01709_si_003.csv
5281670	C1=CC(=C(C=C1O)O)C2=C(C(=O)C3=C(C=C(C=C3O2)O)O)O	[M+H]+	162.6620034	Benzenoids	drugCCS_ac7b01709_si_003.csv
23666110	C1=CC(=C(C=C1OC2=C(C=C(C=C2I)C[C@@H](C(=O)[O-])N)I)I)O.[Na+]	[M+H]+	205.1760076	Organic acids and derivatives	drugCCS_ac7b01709_si_003.csv
5920	C1=CC(=C(C=C1OC2=C(C=C(C=C2I)C[C@@H](C(=O)O)N)I)I)O	[M+H]+	205.294304	Organic acids and derivatives	drugCCS_ac7b01709_si_003.csv
1066	C1=CC(=C(N=C1)C(=O)O)C(=O)O	[M+H]+	130.2458362	Organoheterocyclic compounds	drugCCS_ac7b01709_si_003.csv
5892	C1=CC(=C[N+](=C1)[C@H]2[C@@H]([C@@H]([C@H](O2)COP(=O)([O-])OP(=O)(O)OC[C@@H]3[C@H]([C@H]([C@@H](O3)N4C=NC5=C(N=CN=C54)N)O)O)O)O)C(=O)N	[M+H]+	226.9614576	Organoheterocyclic compounds	drugCCS_ac7b01709_si_003.csv
71668	C1=CC(=C[N+](=C1)[O-])CO	[M+H]+	120.4255726	Organoheterocyclic compounds	drugCCS_ac7b01709_si_003.csv
51082	C1=CC(=C2C(=C1NCCNCCO)C(=O)C3=C(C=CC(=C3C2=O)O)O)NCCNCCO.Cl.Cl	[M+H]+	195.9260151	Organoheterocyclic compounds	drugCCS_ac7b01709_si_003.csv
4488	C1=CC(=CC(=C1)NC2=C(C=CC=N2)C(=O)O)C(F)(F)F	[M+H]+	159.3520316	Organoheterocyclic compounds	drugCCS_ac7b01709_si_003.csv
638278	C1=CC(=CC=C1/C=C/C(=O)C2=C(C=C(C=C2)O)O)O	[M+H]+	158.2501592	Benzenoids	drugCCS_ac7b01709_si_003.csv
8813	C1=CC(=CC=C1C(=N)N)OCCCCCOC2=CC=C(C=C2)C(=N)N.C(CS(=O)(=O)O)O.C(CS(=O)(=O)O)O	[M+H]+	174.5463737	Benzenoids	drugCCS_ac7b01709_si_003.csv
5337997	C1=CC(=CC=C1C(=O)N/N=C/C2=CC=C(O2)[N+](=O)[O-])O	[M+H]+	154.4314552	Benzenoids	drugCCS_ac7b01709_si_003.csv
169371	C1=CC(=CC=C1C(=O)N[C@@H](CCC(=O)O)C(=O)O)NCC2=CN=C3C(=N2)C(=NC(=N3)N)N	[M+H]+	204.433013	Organoheterocyclic compounds	drugCCS_ac7b01709_si_003.csv
135398658	C1=CC(=CC=C1C(=O)N[C@@H](CCC(=O)O)C(=O)O)NCC2=CN=C3C(=N2)C(=O)NC(=N3)N	[M+H]+	196.7505854	Organoheterocyclic compounds	drugCCS_ac7b01709_si_003.csv
2148	C1=CC(=CC=C1C(=O)NCC(=O)O)N	[M+H]+	155.3381966	Benzenoids	drugCCS_ac7b01709_si_003.csv
460612	C1=CC(=CC=C1C[C@@H](C(=O)O)N)N(CCCl)CCCl	[M+H]+	168.6901856	Organic acids and derivatives	drugCCS_ac7b01709_si_003.csv
5280863	C1=CC(=CC=C1C2=C(C(=O)C3=C(C=C(C=C3O2)O)O)O)O	[M+H]+	159.2427742	Benzenoids	drugCCS_ac7b01709_si_003.csv
5280443	C1=CC(=CC=C1C2=CC(=O)C3=C(C=C(C=C3O2)O)O)O	[M+H]+	155.978244	Benzenoids	drugCCS_ac7b01709_si_003.csv
5282073	C1=CC(=CC=C1C2=CC(=O)C3=C(O2)C=C(C=C3)O)O	[M+H]+	153.1748439	Benzenoids	drugCCS_ac7b01709_si_003.csv
182362	C1=CC(=CC=C1C2=CC(=O)C3=C(O2)C=CC(=C3)O)O	[M+H]+	152.6601346	Benzenoids	drugCCS_ac7b01709_si_003.csv
5281807	C1=CC(=CC=C1C2=COC3=C(C2=O)C=CC(=C3[C@H]4[C@@H]([C@H]([C@@H]([C@H](O4)CO)O)O)O)O)O	[M+H]+	196.4008351	Organoheterocyclic compounds	drugCCS_ac7b01709_si_003.csv
5280961	C1=CC(=CC=C1C2=COC3=CC(=CC(=C3C2=O)O)O)O	[M+H]+	156.5477043	Organoheterocyclic compounds	drugCCS_ac7b01709_si_003.csv
4654	C1=CC(=CC=C1CC(C(=O)O)N)F	[M+H]+	141.1013742	Organic acids and derivatives	drugCCS_ac7b01709_si_003.csv
4788	C1=CC(=CC=C1CCC(=O)C2=C(C=C(C=C2O)O)O)O	[M+H]+	160.6992871	Benzenoids	drugCCS_ac7b01709_si_003.csv
2708	C1=CC(=CC=C1CCCC(=O)O)N(CCCl)CCCl	[M+H]+	168.7007625	Benzenoids	drugCCS_ac7b01709_si_003.csv
68589	C1=CC(=CC=C1COC(CN2C=CN=C2)C3=C(C=C(C=C3)Cl)Cl)Cl.[N+](=O)(O)[O-]	[M+H]+	184.7508139	Organoheterocyclic compounds	drugCCS_ac7b01709_si_003.csv
65495	C1=CC(=CC=C1CSC(CN2C=CN=C2)C3=C(C=C(C=C3)Cl)Cl)Cl.[N+](=O)(O)[O-]	[M+H]+	184.356192	Benzenoids	drugCCS_ac7b01709_si_003.csv
7389	C1=CC(=CC=C1N)[As](=O)(O)O	[M+H]+	133.2385624	Benzenoids	drugCCS_ac7b01709_si_003.csv
2955	C1=CC(=CC=C1N)S(=O)(=O)C2=CC=C(C=C2)N	[M+H]+	151.7091458	Benzenoids	drugCCS_ac7b01709_si_003.csv
5340	C1=CC(=CC=C1N)S(=O)(=O)NC2=NC=CS2	[M+H]+	150.754575	Benzenoids	drugCCS_ac7b01709_si_003.csv
6634	C1=CC(=CC=C1N)S(=O)(=O)NC2=NN=C(C=C2)Cl	[M+H]+	158.2086461	Benzenoids	drugCCS_ac7b01709_si_003.csv
9552079	C1=CC(=CC=C1N/C(=N/C(=NCCCCCCN=C(/N=C(/NC2=CC=C(C=C2)Cl)\N)N)N)/N)Cl	[M+H]+	221.306836	Benzenoids	drugCCS_ac7b01709_si_003.csv
5315	C1=CC(=CC=C1NC(=O)CCC(=O)O)S(=O)(=O)NC2=NC=CS2	[M+H]+	182.4468776	Organoheterocyclic compounds	drugCCS_ac7b01709_si_003.csv
4684	C1=CC(=CC=C1O)Cl	[M+H]+	108.7515378	Benzenoids	drugCCS_ac7b01709_si_003.csv
936	C1=CC(=CN=C1)C(=O)N	[M+H]+	121.6611624	Organoheterocyclic compounds	drugCCS_ac7b01709_si_003.csv
938	C1=CC(=CN=C1)C(=O)O	[M+H]+	120.2656087	Organoheterocyclic compounds	drugCCS_ac7b01709_si_003.csv
23709605	C1=CC(=CN=C1)CC(O)(P(=O)(O)O)P(=O)(O)[O-].O.[Na+]	[M+H]+	195.5622866	Organoheterocyclic compounds	drugCCS_ac7b01709_si_003.csv
93578	C1=CC(=CN=C1)CO.[C@@H]([C@H](C(=O)O)O)(C(=O)O)O	[M+H]+	119.9415885	Organoheterocyclic compounds	drugCCS_ac7b01709_si_003.csv
9500	C1=CC(=NC=C1C(=O)N)N	[M+H]+	125.7027685	Organoheterocyclic compounds	drugCCS_ac7b01709_si_003.csv
822798	C1=CC(=O)C(=C2C(=C1)C=CC(=C2O)O)O	[M+H]+	134.6526779	Benzenoids	drugCCS_ac7b01709_si_003.csv
5100	C1=CC(=O)C=CC1=C(C2=CC=C(C=C2)O)C3=CC=C(C=C3)O	[M+H]+	169.0957107	Benzenoids	drugCCS_ac7b01709_si_003.csv
5281416	C1=CC(=O)OC2=CC(=C(C=C21)O)O	[M+H]+	129.461412	Benzenoids	drugCCS_ac7b01709_si_003.csv
5281417	C1=CC(=O)OC2=CC(=C(C=C21)O[C@H]3[C@@H]([C@H]([C@@H]([C@H](O3)CO)O)O)O)O	[M+H]+	173.9861252	Organoheterocyclic compounds	drugCCS_ac7b01709_si_003.csv
5357218	C1=CC=C(C(=C1)C(=O)/C=C/C2=CC=C(C=C2)O)O	[M+H]+	152.9660621	Benzenoids	drugCCS_ac7b01709_si_003.csv
846	C1=CC=C(C(=C1)C(=O)CC(C(=O)O)N)N	[M+H]+	146.0378482	Organic acids and derivatives	drugCCS_ac7b01709_si_003.csv
5147	C1=CC=C(C(=C1)C(=O)N)O	[M+H]+	122.2131154	Benzenoids	drugCCS_ac7b01709_si_003.csv
4806	C1=CC=C(C(=C1)C(=O)NC2=CC=C(C=C2)S(=O)(=O)NC3=NC=CS3)C(=O)O	[M+H]+	194.8571329	Organoheterocyclic compounds	drugCCS_ac7b01709_si_003.csv
16667734	C1=CC=C(C(=C1)C(=O)O)OC(=O)/C=C/C(=O)OC2=CC=CC=C2C(=O)O	[M+H]+	171.1025196	Benzenoids	drugCCS_ac7b01709_si_003.csv
3418	C1=CC=C(C(=C1)C(=O)O)OP(=O)(O)O	[M+H]+	138.4343199	Benzenoids	drugCCS_ac7b01709_si_003.csv
5161	C1=CC=C(C(=C1)C(=O)OC2=CC=CC=C2C(=O)O)O	[M+H]+	151.271126	Benzenoids	drugCCS_ac7b01709_si_003.csv
3474	C1=CC=C(C(=C1)C(=O)OCC(CO)O)NC2=C3C=CC(=CC3=NC=C2)Cl	[M+H]+	187.2965008	Organoheterocyclic compounds	drugCCS_ac7b01709_si_003.csv
27872	C1=CC=C(C(=C1)C2=C3C=C(C(=O)C(=C3OC4=C(C(=C(C=C24)I)[O-])I)I)I)C(=O)[O-].[Na+].[Na+]	[M+H]+	212.1205847	Organoheterocyclic compounds	drugCCS_ac7b01709_si_003.csv
5391149	C1=CC=C(C(=C1)C2=CC(=O)C3=C(O2)C=C(C=C3)O)O	[M+H]+	152.3884395	Benzenoids	drugCCS_ac7b01709_si_003.csv
5018304	C1=CC=C(C(=C1)CC(=O)[O-])NC2=C(C=CC=C2Cl)Cl.[Na+]	[M+H]+	157.2161028	Benzenoids	drugCCS_ac7b01709_si_003.csv
5376979	C1=CC=C(C=C1)/C=C/C(=O)C2=C(C=C(C=C2)O)O	[M+H]+	153.4982567	Benzenoids	drugCCS_ac7b01709_si_003.csv
6857762	C1=CC=C(C=C1)/C=C/C(=O)C2=C(C=C(C=C2)O[C@H]3[C@@H]([C@H]([C@@H]([C@H](O3)CO)O)O)O)O	[M+H]+	200.584358	Organoheterocyclic compounds	drugCCS_ac7b01709_si_003.csv
5282362	C1=CC=C(C=C1)/C=C/C(=O)C2=CC=C(C=C2)O	[M+H]+	150.7928656	Benzenoids	drugCCS_ac7b01709_si_003.csv
656516	C1=CC=C(C=C1)[C@H](C#N)O[C@H]2[C@@H]([C@H]([C@@H]([C@H](O2)CO[C@H]3[C@@H]([C@H]([C@@H]([C@H](O3)CO)O)O)O)O)O)O	[M+H]+	200.638072	Organic oxygen compounds	drugCCS_ac7b01709_si_003.csv
2723597	C1=CC=C(C=C1)C(=O)CN.Cl	[M+H]+	126.1935034	Benzenoids	drugCCS_ac7b01709_si_003.csv
10718	C1=CC=C(C=C1)C(=O)NC2=CC(=C(C=C2)C(=O)O)O	[M+H]+	156.345907	Benzenoids	drugCCS_ac7b01709_si_003.csv
71651	C1=CC=C(C=C1)C(=O)NCCC(=O)O	[M+H]+	138.6865631	Benzenoids	drugCCS_ac7b01709_si_003.csv
5319	C1=CC=C(C=C1)C(=O)NS(=O)(=O)C2=CC=C(C=C2)N	[M+H]+	158.2023697	Benzenoids	drugCCS_ac7b01709_si_003.csv
243	C1=CC=C(C=C1)C(=O)O	[M+H]+	122.1696956	Benzenoids	drugCCS_ac7b01709_si_003.csv
6855	C1=CC=C(C=C1)C(=O)OC2=CC=CC3=C2N=CC=C3	[M+H]+	153.84991	Organoheterocyclic compounds	drugCCS_ac7b01709_si_003.csv
657302	C1=CC=C(C=C1)C2(C(=O)[N-]C(=O)N2)C3=CC=CC=C3.[Na+]	[M+H]+	158.3807975	Organoheterocyclic compounds	drugCCS_ac7b01709_si_003.csv
5281616	C1=CC=C(C=C1)C2=C(C(=O)C3=C(C=C(C=C3O2)O)O)O	[M+H]+	154.9143884	Benzenoids	drugCCS_ac7b01709_si_003.csv
5393152	C1=CC=C(C=C1)C2=C(C(=O)C3=C(O2)C=C(C=C3)O)O	[M+H]+	152.0664165	Benzenoids	drugCCS_ac7b01709_si_003.csv
11349	C1=CC=C(C=C1)C2=C(C(=O)C3=CC=CC=C3O2)O	[M+H]+	146.2870324	Benzenoids	drugCCS_ac7b01709_si_003.csv
4614	C1=CC=C(C=C1)C2=C(OC(=N2)CCC(=O)O)C3=CC=CC=C3	[M+H]+	169.7355358	Organoheterocyclic compounds	drugCCS_ac7b01709_si_003.csv
5281607	C1=CC=C(C=C1)C2=CC(=O)C3=C(C=C(C=C3O2)O)O	[M+H]+	151.6838539	Benzenoids	drugCCS_ac7b01709_si_003.csv
68112	C1=CC=C(C=C1)C2=CC(=O)C3=C(C=CC=C3O2)O	[M+H]+	147.2783808	Benzenoids	drugCCS_ac7b01709_si_003.csv
1880	C1=CC=C(C=C1)C2=CC(=O)C3=C(O2)C(=C(C=C3)O)O	[M+H]+	151.9502871	Benzenoids	drugCCS_ac7b01709_si_003.csv
5281605	C1=CC=C(C=C1)C2=CC(=O)C3=C(O2)C=C(C(=C3O)O)O	[M+H]+	153.8300439	Benzenoids	drugCCS_ac7b01709_si_003.csv
5281894	C1=CC=C(C=C1)C2=CC(=O)C3=C(O2)C=C(C=C3)O	[M+H]+	148.8567339	Benzenoids	drugCCS_ac7b01709_si_003.csv
2378	C1=CC=C(C=C1)C2=CC=C(C=C2)C(C3=CC=CC=C3)N4C=CN=C4	[M+H]+	184.8404008	Benzenoids	drugCCS_ac7b01709_si_003.csv
5377381	C1=CC=C(C=C1)C2=COC3=CC(=CC(=C3C2=O)O)O	[M+H]+	152.2839955	Organoheterocyclic compounds	drugCCS_ac7b01709_si_003.csv
5546	C1=CC=C(C=C1)C2=NC3=C(N=C(N=C3N=C2N)N)N	[M+H]+	155.3637044	Organoheterocyclic compounds	drugCCS_ac7b01709_si_003.csv
8593	C1=CC=C(C=C1)C2=NC3=CC=CC=C3C(=C2)C(=O)O	[M+H]+	154.2888127	Organoheterocyclic compounds	drugCCS_ac7b01709_si_003.csv
4760	C1=CC=C(C=C1)C2C(=O)C3=CC=CC=C3C2=O	[M+H]+	145.9166758	Benzenoids	drugCCS_ac7b01709_si_003.csv
4753	C1=CC=C(C=C1)CC(=O)NC(=O)N	[M+H]+	128.3471487	Benzenoids	drugCCS_ac7b01709_si_003.csv
2315	C1=CC=C(C=C1)CC2NC3=C(C=C(C(=C3)C(F)(F)F)S(=O)(=O)N)S(=O)(=O)N2	[M+H]+	188.6107186	Organoheterocyclic compounds	drugCCS_ac7b01709_si_003.csv
13266	C1=CC=C(C=C1)CCN=C(N)N=C(N)N.Cl	[M+H]+	145.7330914	Benzenoids	drugCCS_ac7b01709_si_003.csv
6054	C1=CC=C(C=C1)CCO	[M+H]+	121.2069436	Benzenoids	drugCCS_ac7b01709_si_003.csv
10391	C1=CC=C(C=C1)CNC(=O)CCCl	[M+H]+	142.2656285	Benzenoids	drugCCS_ac7b01709_si_003.csv
4472	C1=CC=C(C=C1)CNC(=O)CCNNC(=O)C2=CC=NC=C2	[M+H]+	174.3186589	Organoheterocyclic compounds	drugCCS_ac7b01709_si_003.csv
78457	C1=CC=C(C=C1)COC[C@@H](C(=O)O)N	[M+H]+	142.4522785	Benzenoids	drugCCS_ac7b01709_si_003.csv
2343	C1=CC=C(C=C1)CSCC2=NS(=O)(=O)C3=CC(=C(C=C3N2)Cl)S(=O)(=O)N	[M+H]+	186.7338897	Organoheterocyclic compounds	drugCCS_ac7b01709_si_003.csv
8691	C1=CC=C(C=C1)N=NC2=C(N=C(C=C2)N)N.Cl	[M+H]+	147.7855809	Benzenoids	drugCCS_ac7b01709_si_003.csv
5335	C1=CC=C(C=C1)N2C(=CC=N2)NS(=O)(=O)C3=CC=C(C=C3)N	[M+H]+	170.0111039	Organoheterocyclic compounds	drugCCS_ac7b01709_si_003.csv
5342	C1=CC=C(C=C1)N2C(=O)C(C(=O)N2C3=CC=CC=C3)CCS(=O)C4=CC=CC=C4	[M+H]+	193.4517186	Organoheterocyclic compounds	drugCCS_ac7b01709_si_003.csv
3194	C1=CC=C(C=C1)N2C(=O)C3=CC=CC=C3[Se]2	[M+H]+	145.4530809	Organoheterocyclic compounds	drugCCS_ac7b01709_si_003.csv
6872	C1=CC=C(C=C1)NC(=O)C2=CC=CC=C2O	[M+H]+	143.9349637	Benzenoids	drugCCS_ac7b01709_si_003.csv
4386	C1=CC=C(C=C1)NC2=CC=CC=C2C(=O)O	[M+H]+	144.4826708	Benzenoids	drugCCS_ac7b01709_si_003.csv
8609	C1=CC=C(C=C1)OC(=O)C2=C(C=C(C=C2)N)O	[M+H]+	163.3784561	Benzenoids	drugCCS_ac7b01709_si_003.csv
54676038	C1=CC=C2C(=C1)C(=C(C(=O)O2)CC3=C(C4=CC=CC=C4OC3=O)O)O	[M+H]+	181.9811471	Organoheterocyclic compounds	drugCCS_ac7b01709_si_003.csv
7019	C1=CC=C2C(=C1)C(=C3C=CC=CC3=N2)N	[M+H]+	136.7741786	Organoheterocyclic compounds	drugCCS_ac7b01709_si_003.csv
5042	C1=CC=C2C(=C1)C(=CC(=O)N2)CC(C(=O)O)NC(=O)C3=CC=C(C=C3)Cl	[M+H]+	185.0139053	Organoheterocyclic compounds	drugCCS_ac7b01709_si_003.csv
2741	C1=CC=C2C(=C1)C(=O)C=C(O2)C(=O)O	[M+H]+	133.9553832	Benzenoids	drugCCS_ac7b01709_si_003.csv
4764	C1=CC=C2C(=C1)C(=O)OC2(C3=CC=C(C=C3)O)C4=CC=C(C=C4)O	[M+H]+	172.053318	Benzenoids	drugCCS_ac7b01709_si_003.csv
16850	C1=CC=C2C(=C1)C(=O)OC23C4=C(C=C(C=C4)O)OC5=C3C=CC(=C5)O	[M+H]+	172.3356797	Organoheterocyclic compounds	drugCCS_ac7b01709_si_003.csv
323	C1=CC=C2C(=C1)C=CC(=O)O2	[M+H]+	122.2483255	Benzenoids	drugCCS_ac7b01709_si_003.csv
2554	C1=CC=C2C(=C1)C=CC3=CC=CC=C3N2C(=O)N	[M+H]+	149.0122399	Benzenoids	drugCCS_ac7b01709_si_003.csv
64961	C1=CC=C2C(=C1)C3=C(N2)C=NC=C3	[M+H]+	132.173591	Organoheterocyclic compounds	drugCCS_ac7b01709_si_003.csv
3693427	C1=CC=C2C(=C1)N=CC(=N2)[N-]S(=O)(=O)C3=CC=C(C=C3)N.[Na+]	[M]+	157.6255923	Organoheterocyclic compounds	drugCCS_ac7b01709_si_003.csv
5430	C1=CC=C2C(=C1)NC(=N2)C3=CSC=N3	[M+H]+	137.6891713	Organoheterocyclic compounds	drugCCS_ac7b01709_si_003.csv
697993	C1=CC=C2C(=C1)NC(=S)S2	[M+H]+	126.4137895	Organoheterocyclic compounds	drugCCS_ac7b01709_si_003.csv
5336	C1=CC=NC(=C1)NS(=O)(=O)C2=CC=C(C=C2)N	[M+H]+	151.5910123	Benzenoids	drugCCS_ac7b01709_si_003.csv
5339	C1=CC=NC(=C1)NS(=O)(=O)C2=CC=C(C=C2)N=NC3=CC(=C(C=C3)O)C(=O)O	[M+H]+	200.3841614	Organoheterocyclic compounds	drugCCS_ac7b01709_si_003.csv
2453	C1=CC2=C(C(=C(C=C2Br)Br)O)N=C1	[M+H]+	137.697821	Organoheterocyclic compounds	drugCCS_ac7b01709_si_003.csv
2722	C1=CC2=C(C(=C(C=C2Cl)Cl)O)N=C1	[M+H]+	134.2595187	Organoheterocyclic compounds	drugCCS_ac7b01709_si_003.csv
2788	C1=CC2=C(C(=C(C=C2Cl)I)O)N=C1	[M+H]+	138.1658271	Organoheterocyclic compounds	drugCCS_ac7b01709_si_003.csv
3728	C1=CC2=C(C(=C(C=C2I)I)O)N=C1	[M+H]+	143.7287667	Organoheterocyclic compounds	drugCCS_ac7b01709_si_003.csv
11043	C1=CC2=C(C(=C(C=C2S(=O)(=O)O)I)O)N=C1	[M+H]+	165.5007722	Organoheterocyclic compounds	drugCCS_ac7b01709_si_003.csv
2950	C1=CC2=C(C(=C1)O)C(=O)C3=C(C2=O)C=CC=C3O	[M+H]+	148.2718068	Benzenoids	drugCCS_ac7b01709_si_003.csv
1923	C1=CC2=C(C(=C1)O)N=CC=C2	[M+H]+	123.5989276	Organoheterocyclic compounds	drugCCS_ac7b01709_si_003.csv
5699	C1=CC2=C(C(=C1)O)NC(=CC2=O)C(=O)O	[M+H]+	137.674238	Organoheterocyclic compounds	drugCCS_ac7b01709_si_003.csv
27503	C1=CC2=C(C(=C1)OCC(COC3=CC=CC4=C3C(=O)C=C(O4)C(=O)[O-])O)C(=O)C=C(O2)C(=O)[O-].[Na+].[Na+]	[M+H]+	205.6033919	Organoheterocyclic compounds	drugCCS_ac7b01709_si_003.csv
6103	C1=CC2=C(C=C1Cl)N=C(O2)N	[M+H]+	129.7079401	Organoheterocyclic compounds	drugCCS_ac7b01709_si_003.csv
1820	C1=CC2=C(C=C1F)C=C(N2)C(=O)O	[M+H]+	145.2548553	Organoheterocyclic compounds	drugCCS_ac7b01709_si_003.csv
72139	C1=CC2=C(C=C1O)OC(=O)S2	[M+H]+	130.1656039	Benzenoids	drugCCS_ac7b01709_si_003.csv
2817	C1=CC2=C(C=CC(=C2N=C1)O)Cl	[M+H]+	129.5223103	Organoheterocyclic compounds	drugCCS_ac7b01709_si_003.csv
145949	C1=CC2=C3C(=C1)C(=O)N(C(=O)C3=CC=C2)CCCC(=O)O	[M+H]+	156.5344073	Organoheterocyclic compounds	drugCCS_ac7b01709_si_003.csv
6175	C1=CN(C(=O)N=C1N)[C@H]2[C@@H]([C@@H]([C@H](O2)CO)O)O	[M+H]+	151.1336816	Organic oxygen compounds	drugCCS_ac7b01709_si_003.csv
6253	C1=CN(C(=O)N=C1N)[C@H]2[C@H]([C@@H]([C@H](O2)CO)O)O	[M+H]+	150.4898938	Organic oxygen compounds	drugCCS_ac7b01709_si_003.csv
1046	C1=CN=C(C=N1)C(=O)N	[M+H]+	122.8094268	Organic acids and derivatives	drugCCS_ac7b01709_si_003.csv
5215	C1=CN=C(N=C1)NS(=O)(=O)C2=CC=C(C=C2)N	[M+H]+	150.8929299	Benzenoids	drugCCS_ac7b01709_si_003.csv
3767	C1=CN=CC=C1C(=O)NN	[M+H]+	125.5585278	Organoheterocyclic compounds	drugCCS_ac7b01709_si_003.csv
3698	C1=CN=CC=C1C2=CNC(=O)C(=C2)N	[M+H]+	139.0048062	Organoheterocyclic compounds	drugCCS_ac7b01709_si_003.csv
1727	C1=CN=CC=C1N	[M+H]+	117.7769738	Organoheterocyclic compounds	drugCCS_ac7b01709_si_003.csv
25050	C1=CN2[C@H]3[C@H]([C@@H]([C@H](O3)CO)O)OC2=NC1=N.Cl	[M+H]+	141.5359636	Organoheterocyclic compounds	drugCCS_ac7b01709_si_003.csv
20345	C1=COC(=C1)CNC2=C3C(=NC=N2)N(C=N3)[C@H]4[C@@H]([C@@H]([C@H](O4)CO)O)O	[M+H]+	179.0224227	Organoheterocyclic compounds	drugCCS_ac7b01709_si_003.csv
3440	C1=COC(=C1)CNC2=CC(=C(C=C2C(=O)O)S(=O)(=O)N)Cl	[M+H]+	169.2527975	Organoheterocyclic compounds	drugCCS_ac7b01709_si_003.csv
3830	C1=COC(=C1)CNC2=NC=NC3=C2NC=N3	[M+H]+	144.0629738	Organoheterocyclic compounds	drugCCS_ac7b01709_si_003.csv
2155	C1=CSC(=N1)N	[M+H]+	117.2167405	Organic acids and derivatives	drugCCS_ac7b01709_si_003.csv
68296	C1=CSSC1=S	[M+H]+	120.4471649	Organic acids and derivatives	drugCCS_ac7b01709_si_003.csv
17513	C1=NC(=C(N1[C@H]2[C@@H]([C@@H]([C@H](O2)CO)O)O)N)C(=O)N	[M+H]+	152.981162	Organic oxygen compounds	drugCCS_ac7b01709_si_003.csv
60961	C1=NC(=C2C(=N1)N(C=N2)[C@H]3[C@@H]([C@@H]([C@H](O3)CO)O)O)N	[M+H]+	156.870045	Organoheterocyclic compounds	drugCCS_ac7b01709_si_003.csv
6083	C1=NC(=C2C(=N1)N(C=N2)[C@H]3[C@@H]([C@@H]([C@H](O3)COP(=O)(O)O)O)O)N	[M+H]+	167.5765255	Organoheterocyclic compounds	drugCCS_ac7b01709_si_003.csv
21704	C1=NC(=C2C(=N1)N(C=N2)[C@H]3[C@H]([C@@H]([C@H](O3)CO)O)O)N	[M+H]+	156.3909725	Organoheterocyclic compounds	drugCCS_ac7b01709_si_003.csv
3366	C1=NC(=O)NC(=C1F)N	[M+H]+	118.448991	Organoheterocyclic compounds	drugCCS_ac7b01709_si_003.csv
135403800	C1=NC2=C(C(=O)NC(=N2)N)NC1=O	[M+H]+	131.0569438	Organoheterocyclic compounds	drugCCS_ac7b01709_si_003.csv
30751	C1=NC2=C(N=C(N=C2N1[C@H]3[C@H]([C@@H]([C@H](O3)COP(=O)(O)O)O)O)F)N	[M+H]+	168.7585714	Organoheterocyclic compounds	drugCCS_ac7b01709_si_003.csv
135398638	C1=NC2=C(N1)C(=O)NC=N2	[M+H]+	123.1244183	Organoheterocyclic compounds	drugCCS_ac7b01709_si_003.csv
2723601	C1=NC2=C(N1)C(=S)N=C(N2)N	[M+H]+	129.7242523	Organoheterocyclic compounds	drugCCS_ac7b01709_si_003.csv
667490	C1=NC2=C(N1)C(=S)N=CN2	[M+H]+	125.5197921	Organoheterocyclic compounds	drugCCS_ac7b01709_si_003.csv
2724387	C1=NC2=C(N1[C@H]3[C@@H]([C@@H]([C@H](O3)CO)O)O)NC(=NC2=S)N	[M+H]+	164.0004286	Organoheterocyclic compounds	drugCCS_ac7b01709_si_003.csv
135398513	C1=NC2=C(N1COCCO)N=C(NC2=O)N	[M+H]+	146.4637559	Organoheterocyclic compounds	drugCCS_ac7b01709_si_003.csv
190	C1=NC2=NC=NC(=C2N1)N	[M+H]+	122.427794	Organoheterocyclic compounds	drugCCS_ac7b01709_si_003.csv
135401907	C1=NNC2=C1C(=O)NC=N2	[M+H]+	123.0189222	Organoheterocyclic compounds	drugCCS_ac7b01709_si_003.csv
135398604	C1C(=NC2=C(N1)N=C(NC2=O)N)CNC3=CC=C(C=C3)C(=O)N[C@@H](CCC(=O)O)C(=O)O	[M-H]+	196.9483143	Organoheterocyclic compounds	drugCCS_ac7b01709_si_003.csv
932	C1C(OC2=CC(=CC(=C2C1=O)O)O)C3=CC=C(C=C3)O	[M+H]+	160.6485331	Organoheterocyclic compounds	drugCCS_ac7b01709_si_003.csv
72131	C1C[C@@H]([C@@H]([C@@H]2[C@@H]1CN3CCC4=C([C@@H]3C2)NC5=CC=CC=C45)C(=O)O)O	[M+H]+	181.6585092	Organoheterocyclic compounds	drugCCS_ac7b01709_si_003.csv
5362119	C1C[C@H](N(C1)C(=O)[C@H](CCCCN)N[C@@H](CCC2=CC=CC=C2)C(=O)O)C(=O)O	[M+H]+	189.6560253	Organic acids and derivatives	drugCCS_ac7b01709_si_003.csv
5282242	C1C=C(N2[C@H](S1)[C@@H](C2=O)NC(=O)/C(=C\CC(=O)O)/C3=CSC(=N3)N)C(=O)O	[M+H]+	191.4484468	Organoheterocyclic compounds	drugCCS_ac7b01709_si_003.csv
2202	C1C2=C(C(=CC=C2)O)C(=O)C3=C1C=CC=C3O	[M+H]+	142.5581692	Benzenoids	drugCCS_ac7b01709_si_003.csv
135413494	C1C2=C(C=CC(=C2Cl)Cl)N=C3N1CC(=O)N3.Cl	[M+H]+	147.8986225	Organoheterocyclic compounds	drugCCS_ac7b01709_si_003.csv
442514	C1C2=CC(=C(C=C2[C@H]3[C@@]1(COC4=C3C=CC(=C4O)O)O)O)O	[M-H]+	162.5118986	Organoheterocyclic compounds	drugCCS_ac7b01709_si_003.csv
135403802	C1C2=CC(=C(C=C2C3=C4C=CC(=O)C(=C4OCC31O)O)O)O	[M+H]+	162.5424798	Organoheterocyclic compounds	drugCCS_ac7b01709_si_003.csv
6453902	C1C2=CC(=C(C=C2C3=C4C=CC(=O)C=C4OCC31O)O)O	[M+H]+	159.9270434	Organoheterocyclic compounds	drugCCS_ac7b01709_si_003.csv
34312	C1C2=CC=CC=C2N(C3=CC=CC=C3C1=O)C(=O)N	[M+H]+	152.7426615	Organoheterocyclic compounds	drugCCS_ac7b01709_si_003.csv
64150	C1C2CC3CC1CC(C2)(C3)N.Cl	[M+H]+	138.5942364	Lipids and lipid-like molecules	drugCCS_ac7b01709_si_003.csv
442649	C1CC(=NC1)C2=CN=CC=C2	[M+H]+	128.2068381	Organoheterocyclic compounds	drugCCS_ac7b01709_si_003.csv
60795	C1CC(=O)NC2=C1C=CC(=C2)OCCCCN3CCN(CC3)C4=C(C(=CC=C4)Cl)Cl	[M+H]+	203.4755661	Organoheterocyclic compounds	drugCCS_ac7b01709_si_003.csv
5360733	C1CC(C1)CN2CC[C@]34[C@@H]5[C@H](CC[C@]3([C@H]2CC6=C4C(=C(C=C6)O)O5)O)O.Cl	[M+H]+	180.8167572	Organoheterocyclic compounds	drugCCS_ac7b01709_si_003.csv
10648	C1CC(C2=CC=CC=C2C1)C3=NCCN3.Cl	[M+H]+	145.8989465	Organoheterocyclic compounds	drugCCS_ac7b01709_si_003.csv
108013	C1CC(CCC1NCC2=C(C(=CC(=C2)Br)Br)N)O.Cl	[M+H]+	171.0387732	Benzenoids	drugCCS_ac7b01709_si_003.csv
4498	C1CC(CNC1)C(=O)O	[M+H]+	124.5576438	Organic acids and derivatives	drugCCS_ac7b01709_si_003.csv
5485201	C1CC1CN2CC[C@]34[C@@H]5C(=O)CC[C@]3([C@H]2CC6=C4C(=C(C=C6)O)O5)O.Cl	[M+H]+	175.9731888	Organoheterocyclic compounds	drugCCS_ac7b01709_si_003.csv
2764	C1CC1N2C=C(C(=O)C3=CC(=C(C=C32)N4CCNCC4)F)C(=O)O	[M+H]+	185.3065429	Organoheterocyclic compounds	drugCCS_ac7b01709_si_003.csv
2764	C1CC1N2C=C(C(=O)C3=CC(=C(C=C32)N4CCNCC4)F)C(=O)O	[M+H]+	173.3438618	Organoheterocyclic compounds	drugCCS_ac7b01709_si_003.csv
3046290	C1CC2=NC3=CC=CC=C3CN2C1.Cl	[M+H]+	134.0732276	Organoheterocyclic compounds	drugCCS_ac7b01709_si_003.csv
212231	C1CCC(C(C1)N2CCC(CC2)C3=CC=CC=C3)O.Cl	[M+H]+	164.3465819	Organic acids and derivatives	drugCCS_ac7b01709_si_003.csv
3446	C1CCC(CC1)(CC(=O)O)CN	[M+H]+	138.6134849	Lipids and lipid-like molecules	drugCCS_ac7b01709_si_003.csv
4891	C1CCC(CC1)C(=O)N2CC3C4=CC=CC=C4CCN3C(=O)C2	[M+H]+	176.488677	Organoheterocyclic compounds	drugCCS_ac7b01709_si_003.csv
5284439	C1CCC(CC1)C(CC2CCCCN2)C3CCCCC3.C(=C\C(=O)O)\C(=O)O	[M+H]+	179.8493493	Lipids and lipid-like molecules	drugCCS_ac7b01709_si_003.csv
207841	C1CCC(CC1)C(CCN2CCCC2)(C3=CC=CC=C3)O.Cl	[M+H]+	171.5327342	Benzenoids	drugCCS_ac7b01709_si_003.csv
66007	C1CCC(CC1)C(CCN2CCCCC2)(C3=CC=CC=C3)O.Cl	[M+H]+	174.93155	Benzenoids	drugCCS_ac7b01709_si_003.csv
2754	C1CCC(CC1)N2C(=NN=N2)CCCCOC3=CC4=C(C=C3)NC(=O)CC4	[M+H]+	199.713141	Organoheterocyclic compounds	drugCCS_ac7b01709_si_003.csv
36431	C1CCC2(C1)CC(=O)N(C(=O)C2)CCCCN3CCN(CC3)C4=NC=CC=N4.Cl	[M+H]+	197.7269775	Organic acids and derivatives	drugCCS_ac7b01709_si_003.csv
2723754	C1CCC2=NC3=CC=CC=C3C(=C2C1)N.Cl	[M+H]+	141.4297375	Organoheterocyclic compounds	drugCCS_ac7b01709_si_003.csv
5917	C1CCC2=NN=NN2CC1	[M+H]+	124.5373625	Organic acids and derivatives	drugCCS_ac7b01709_si_003.csv
1794	C1CCCN(CC1)C2=NC(=C(N=C2Cl)C(=O)N=C(N)N)N	[M+H]+	174.6906909	Organoheterocyclic compounds	drugCCS_ac7b01709_si_003.csv
86471	C1CCCN(CCC1)CCN=C(N)N.OS(=O)(=O)O	[M+H]+	144.2363411	Lipids and lipid-like molecules	drugCCS_ac7b01709_si_003.csv
5309446	C1CCN(C1)CC2=NC3=CC=CC=C3N2CC4=CC=C(C=C4)Cl.Cl	[M+H]+	179.7706694	Organoheterocyclic compounds	drugCCS_ac7b01709_si_003.csv
638024	C1CCN(CC1)C(=O)/C=C/C=C/C2=CC3=C(C=C2)OCO3	[M+H]+	171.4244149	Benzenoids	drugCCS_ac7b01709_si_003.csv
4830	C1CCN(CC1)C2(CCN(CC2)CCCC(=O)C3=CC=C(C=C3)F)C(=O)N	[M+H]+	192.6042817	Organic acids and derivatives	drugCCS_ac7b01709_si_003.csv
4201	C1CCN(CC1)C2=NC(=N)N(C(=C2)N)O	[M+H]+	146.1133972	Organoheterocyclic compounds	drugCCS_ac7b01709_si_003.csv
3108	C1CCN(CC1)C2=NC(=NC3=C2N=C(N=C3N4CCCCC4)N(CCO)CCO)N(CCO)CCO	[M+H]+	223.9241077	Organoheterocyclic compounds	drugCCS_ac7b01709_si_003.csv
10830	C1CCN(CC1)CC(COC(=O)NC2=CC=CC=C2)OC(=O)NC3=CC=CC=C3.Cl	[M+H]+	202.5557643	Benzenoids	drugCCS_ac7b01709_si_003.csv
2381	C1CCN(CC1)CCC(C2CC3CC2C=C3)(C4=CC=CC=C4)O	[M+H]+	175.7056306	Benzenoids	drugCCS_ac7b01709_si_003.csv
161104	C1CCN(CC1)CCOC(C2=CC=CC=C2)C3=CC=C(C=C3)Cl.Cl	[M+H]+	180.4140953	Benzenoids	drugCCS_ac7b01709_si_003.csv
54900	C1CCN(CC1)CCOC2=CC=C(C=C2)C(=O)C3=C(SC4=C3C=CC(=C4)O)C5=CC=C(C=C5)O.Cl	[M+H]+	213.3956066	Organoheterocyclic compounds	drugCCS_ac7b01709_si_003.csv
442872	C1CCN2[C@H](C1)[C@]34C[C@H]2C=CC3=CC(=O)O4	[M+H]+	146.4141088	Organoheterocyclic compounds	drugCCS_ac7b01709_si_003.csv
23616742	C1CCN2C[C@@H]3C[C@H]([C@H]2C1)CN4[C@H]3CCCC4.OS(=O)(=O)O	[M+H]+	152.8129131	Lipids and lipid-like molecules	drugCCS_ac7b01709_si_003.csv
5351561	C1CCN2CC3CC(C2C1)CN4C3CCCC4=O.OCl(=O)(=O)=O	[M+H]+	156.5348137	Lipids and lipid-like molecules	drugCCS_ac7b01709_si_003.csv
91461	C1CCN2CCC[C@H]([C@H]2C1)CO	[M+H]+	135.305924	Lipids and lipid-like molecules	drugCCS_ac7b01709_si_003.csv
6477011	C1CCNC(=O)/C=C/[C@]23CCC(=O)C[C@H]2OC4=C3C=C(C=C4)/C=C/C(=O)NCCCNC1	[M+H]+	203.4349401	Organoheterocyclic compounds	drugCCS_ac7b01709_si_003.csv
4046	C1CCNC(C1)C(C2=CC(=NC3=C2C=CC=C3C(F)(F)F)C(F)(F)F)O	[M+H]+	181.8100919	Organoheterocyclic compounds	drugCCS_ac7b01709_si_003.csv
167266	C1CCNC(C1)C2=CN=CC=C2.Cl	[M+H]+	137.2248841	Organoheterocyclic compounds	drugCCS_ac7b01709_si_003.csv
2896	C1CN(C(=N1)N)CC(=O)O	[M+H]+	124.2974483	Organic acids and derivatives	drugCCS_ac7b01709_si_003.csv
3168	C1CN(CC=C1N2C3=CC=CC=C3NC2=O)CCCC(=O)C4=CC=C(C=C4)F	[M+H]+	195.0409083	Organoheterocyclic compounds	drugCCS_ac7b01709_si_003.csv
65335	C1CN(CC2=C1SC=C2)CC3=CC=CC=C3Cl.Cl	[M+H]+	154.8491433	Benzenoids	drugCCS_ac7b01709_si_003.csv
11391	C1CN(CC2=CC=CC=C21)C(=N)N.C1CN(CC2=CC=CC=C21)C(=N)N.OS(=O)(=O)O	[M+H]+	138.655186	Benzenoids	drugCCS_ac7b01709_si_003.csv
33630	C1CN(CCC1(C2=CC(=C(C=C2)Cl)C(F)(F)F)O)CCCC(C3=CC=C(C=C3)F)C4=CC=C(C=C4)F	[M+H]+	219.1099611	Organoheterocyclic compounds	drugCCS_ac7b01709_si_003.csv
2448	C1CN(CCC1(C2=CC=C(C=C2)Br)O)CCCC(=O)C3=CC=C(C=C3)F	[M+H]+	194.9312595	Benzenoids	drugCCS_ac7b01709_si_003.csv
3559	C1CN(CCC1(C2=CC=C(C=C2)Cl)O)CCCC(=O)C3=CC=C(C=C3)F	[M+H]+	191.6929067	Benzenoids	drugCCS_ac7b01709_si_003.csv
5265	C1CN(CCC12C(=O)NCN2C3=CC=CC=C3)CCCC(=O)C4=CC=C(C=C4)F	[M+H]+	193.8013752	Organoheterocyclic compounds	drugCCS_ac7b01709_si_003.csv
68626	C1CN(CCC12CNC(=O)O2)CCC3=CC=CC=C3.Cl	[M+H]+	148.9335828	Benzenoids	drugCCS_ac7b01709_si_003.csv
135348	C1CN(CCC1C(=O)C2=CC=C(C=C2)F)CCN3C(=O)C4=CC=CC=C4NC3=O.C(C(C(=O)O)O)(C(=O)O)O	[M+H]+	193.3603093	Organoheterocyclic compounds	drugCCS_ac7b01709_si_003.csv
3151	C1CN(CCC1N2C3=C(C=C(C=C3)Cl)NC2=O)CCCN4C5=CC=CC=C5NC4=O	[M+H]+	201.8309071	Organoheterocyclic compounds	drugCCS_ac7b01709_si_003.csv
16362	C1CN(CCC1N2C3=CC=CC=C3NC2=O)CCCC(C4=CC=C(C=C4)F)C5=CC=C(C=C5)F	[M+H]+	212.625268	Organoheterocyclic compounds	drugCCS_ac7b01709_si_003.csv
4747	C1CN(CCC1O)CCCN2C3=CC=CC=C3SC4=C2C=C(C=C4)C#N	[M+H]+	186.6222526	Organoheterocyclic compounds	drugCCS_ac7b01709_si_003.csv
56207	C1CN(CCN1)C2=C(C=C3C(=C2)N(C=C(C3=O)C(=O)O)C4=CC=C(C=C4)F)F.Cl	[M+H]+	185.4027586	Organoheterocyclic compounds	drugCCS_ac7b01709_si_003.csv
56207	C1CN(CCN1)C2=C(C=C3C(=C2)N(C=C(C3=O)C(=O)O)C4=CC=C(C=C4)F)F.Cl	[M+H]+	199.2729771	Organoheterocyclic compounds	drugCCS_ac7b01709_si_003.csv
5702242	C1CN(CCN1)C2=NC3=CC=CC=C3C=C2.C(=C\C(=O)O)\C(=O)O	[M+H]+	146.5676201	Organoheterocyclic compounds	drugCCS_ac7b01709_si_003.csv
2170	C1CN(CCN1)C2=NC3=CC=CC=C3OC4=C2C=C(C=C4)Cl	[M+H]+	171.1896838	Organoheterocyclic compounds	drugCCS_ac7b01709_si_003.csv
5353532	C1CN(CCN1/C=C/CC2=CC=CC=C2)C(C3=CC=CC=C3)C4=CC=CC=C4	[M+H]+	203.6240599	Benzenoids	drugCCS_ac7b01709_si_003.csv
5282407	C1CN(CCN1C/C=C/C2=CC=CC=C2)C(C3=CC=C(C=C3)F)C4=CC=C(C=C4)F.Cl.Cl	[M+H]+	210.3471878	Benzenoids	drugCCS_ac7b01709_si_003.csv
3169	C1CN(CCN1CC(CO)O)C2=CC=CC=C2	[M+H]+	155.6792275	Benzenoids	drugCCS_ac7b01709_si_003.csv
161803	C1CN(CCN1CC2=CC3=C(C=C2)OCO3)C(=O)COC4=CC=C(C=C4)Cl.Cl	[M+H]+	189.3455586	Organoheterocyclic compounds	drugCCS_ac7b01709_si_003.csv
3038520	C1CN(CCN1CC2=CC3=C(C=C2)OCO3)C4=NC=CC=N4.Cl	[M+H]+	171.1163674	Organoheterocyclic compounds	drugCCS_ac7b01709_si_003.csv
15443	C1CN(CCN1CCCC(=O)C2=CC=C(C=C2)F)C3=CC=CC=N3	[M+H]+	180.0041727	Organoheterocyclic compounds	drugCCS_ac7b01709_si_003.csv
62935	C1CN(CCN1CCCN2C(=O)N3C=CC=CC3=N2)C4=CC(=CC=C4)Cl.Cl	[M+H]+	189.8702487	Organoheterocyclic compounds	drugCCS_ac7b01709_si_003.csv
67356	C1CN(CCN1CCCN2C3=CC=CC=C3SC4=C2C=C(C=C4)C(F)(F)F)CCO.Cl.Cl	[M+H]+	197.4856682	Organoheterocyclic compounds	drugCCS_ac7b01709_si_003.csv
4748	C1CN(CCN1CCCN2C3=CC=CC=C3SC4=C2C=C(C=C4)Cl)CCO	[M+H]+	191.9789854	Organoheterocyclic compounds	drugCCS_ac7b01709_si_003.csv
55182	C1CN(CCN1CCOCC(=O)O)C(C2=CC=CC=C2)C3=CC=C(C=C3)Cl.Cl.Cl	[M+H]+	198.2854394	Benzenoids	drugCCS_ac7b01709_si_003.csv
25096	C1CN(CCN1CCOCCO)C(C2=CC=CC=C2)C3=CC=C(C=C3)Cl.C1=CC=C2C(=C1)C=C(C(=C2CC3=C(C(=CC4=CC=CC=C43)C(=O)O)O)O)C(=O)O	[M+H]+	195.3976809	Benzenoids	drugCCS_ac7b01709_si_003.csv
5002	C1CN(CCN1CCOCCO)C2=NC3=CC=CC=C3SC4=CC=CC=C42	[M+H]+	191.4588436	Organoheterocyclic compounds	drugCCS_ac7b01709_si_003.csv
3690	C1CN(P(=O)(OC1)NCCCl)CCCl	[M+H]+	146.9997483	Organic acids and derivatives	drugCCS_ac7b01709_si_003.csv
154494	C1CN=C(N1)C2COC3=CC=CC=C3O2.Cl	[M+H]+	142.7544402	Benzenoids	drugCCS_ac7b01709_si_003.csv
6048	C1CN=C(N1)CC2=CC=CC=C2.Cl	[M+H]+	135.0832482	Benzenoids	drugCCS_ac7b01709_si_003.csv
11079	C1CN=C(N1)CC2=CC=CC3=CC=CC=C32.Cl	[M+H]+	148.54341	Benzenoids	drugCCS_ac7b01709_si_003.csv
158798	C1CN=C(N1)CN(CC2=CC=CC=C2)C3=CC=CC=C3.OP(=O)(O)O	[M+H]+	162.2248576	Benzenoids	drugCCS_ac7b01709_si_003.csv
20179	C1CN=C(N1)NC2=C(C=CC=C2Cl)Cl.Cl	[M+H]+	143.3395047	Benzenoids	drugCCS_ac7b01709_si_003.csv
84003	C1CN2C(=CC=C2C(=O)C3=CC=CC=C3)C1C(=O)O.C(C(CO)(CO)N)O	[M+H]+	155.6219667	Organoheterocyclic compounds	drugCCS_ac7b01709_si_003.csv
441071	C1CN2CC3=CCO[C@H]4CC(=O)N5[C@H]6[C@H]4[C@H]3C[C@H]2[C@@]61C7=CC=CC=C75	[M+H]+	172.20661	Organoheterocyclic compounds	drugCCS_ac7b01709_si_003.csv
216457	C1CN2CCC1[C@H](C2)OC(=O)N3CCC4=CC=CC=C4[C@@H]3C5=CC=CC=C5.C(CC(=O)O)C(=O)O	[M+H]+	200.9850282	Organoheterocyclic compounds	drugCCS_ac7b01709_si_003.csv
62878	C1CNC[C@H]([C@@H]1C2=CC=C(C=C2)F)COC3=CC4=C(C=C3)OCO4.Cl	[M+H]+	181.0697637	Organoheterocyclic compounds	drugCCS_ac7b01709_si_003.csv
155107	C1CNCC=C1C(=O)O.Cl	[M+H]+	128.4580226	Organic acids and derivatives	drugCCS_ac7b01709_si_003.csv
22420	C1CNP(=O)(OC1)N(CCCl)CCCl.O	[M+H]+	146.5245085	Organic acids and derivatives	drugCCS_ac7b01709_si_003.csv
5323714	C1COC(=O)N1/N=C/C2=CC=C(O2)[N+](=O)[O-]	[M]+	144.1526624	Organoheterocyclic compounds	drugCCS_ac7b01709_si_003.csv
76621	C1COCCN1C(=N)N=C(N)N.Cl	[M+H]+	135.5219559	Organic acids and derivatives	drugCCS_ac7b01709_si_003.csv
9553856	C1COCCN1CC2CN(C(=O)O2)/N=C/C3=CC=C(O3)[N+](=O)[O-]	[M+H]+	166.9111115	Organoheterocyclic compounds	drugCCS_ac7b01709_si_003.csv
27944	C1CSC2=N[C@H](CN21)C3=CC=CC=C3.Cl	[M+H]+	143.9064913	Organoheterocyclic compounds	drugCCS_ac7b01709_si_003.csv
68628	C1CSC2=NC(CN21)C3=CC=CC=C3.Cl	[M+H]+	143.9685561	Organoheterocyclic compounds	drugCCS_ac7b01709_si_003.csv
863	C1CSSC1CCCCC(=O)N	[M+H]+	139.2981089	Lipids and lipid-like molecules	drugCCS_ac7b01709_si_003.csv
4101	C1N2CN3CN1CN(C2)C3	[M+H]+	126.841769	Organic acids and derivatives	drugCCS_ac7b01709_si_003.csv
5370536	C1OC2=C(O1)C=C(C=C2)/C=C/C=C/C(=O)O	[M+H]+	138.5845249	Benzenoids	drugCCS_ac7b01709_si_003.csv
7196	C1OC2=C(O1)C=C(C=C2)C(=O)O	[M+H]+	124.452196	Benzenoids	drugCCS_ac7b01709_si_003.csv
5702197	CC(=C)[C@@H]1CCC(=CC1)C(=O)O	[M+H]+	124.924831	Lipids and lipid-like molecules	drugCCS_ac7b01709_si_003.csv
6758	CC(=C)[C@H]1CC2=C(O1)C=CC3=C2O[C@@H]4COC5=CC(=C(C=C5[C@@H]4C3=O)OC)OC	[M+H]+	193.2076515	Organoheterocyclic compounds	drugCCS_ac7b01709_si_003.csv
10255	CC(=C)[C@H]1CN[C@@H]([C@H]1CC(=O)O)C(=O)O	[M+H]+	144.2297145	Organic acids and derivatives	drugCCS_ac7b01709_si_003.csv
6708593	CC(=C)[C@H]1COC2=C(O1)C=C3C=CC(=O)OC3=C2	[M+H]+	150.0567073	Organoheterocyclic compounds	drugCCS_ac7b01709_si_003.csv
119039	CC(=C)C1=CC2=CC(=C(C=C2O1)O)C(=O)C	[M+H]+	143.2195945	Benzenoids	drugCCS_ac7b01709_si_003.csv
303993	CC(=C)C1CC2=C(O1)C=CC3=C2OC4=C(C3=O)C5=CC(=C(C=C5OC4)OC)OC	[M+H]+	192.2967468	Organoheterocyclic compounds	drugCCS_ac7b01709_si_003.csv
2743	CC(=CC1C(C1(C)C)C(=O)O)C	[M+H]+	129.9956094	Lipids and lipid-like molecules	drugCCS_ac7b01709_si_003.csv
4767	CC(=CC1C(C1(C)C)C(=O)OCC2=CC(=CC=C2)OC3=CC=CC=C3)C	[M+H]+	187.4586703	Benzenoids	drugCCS_ac7b01709_si_003.csv
1550607	CC(=CCC/C(=C/COC1=CC2=C(C=C1)C=CC(=O)O2)/C)C	[M+H]+	158.2938611	Benzenoids	drugCCS_ac7b01709_si_003.csv
9852185	CC(=CCC[C@@]1(C=CC2=C(C3=C(C(=C2O1)CC=C(C)C)O[C@@]45[C@H]6C[C@@H](C=C4C3=O)C(=O)[C@@]5(OC6(C)C)C/C=C(/C)\C(=O)O)O)C)C	[M+H]+	239.0164419	Organoheterocyclic compounds	drugCCS_ac7b01709_si_003.csv
231412	CC(=CCC1=C(C=C2C(=C1O)C(=O)C3=C(C(=C(C=C3O2)OC)OC)CC=C(C)C)OC)C	[M+H]+	209.6945057	Organoheterocyclic compounds	drugCCS_ac7b01709_si_003.csv
5281650	CC(=CCC1=C(C2=C(C=C1O)OC3=C(C2=O)C(=C(C(=C3)O)OC)CC=C(C)C)O)C	[M+H]+	198.7837334	Organoheterocyclic compounds	drugCCS_ac7b01709_si_003.csv
3884	CC(=CCC1=C(C2=CC=CC=C2C(=O)C1=O)O)C	[M-H]+	148.3268816	Organoheterocyclic compounds	drugCCS_ac7b01709_si_003.csv
4871	CC(=CCC1=C2C(=C3C(=C1O)C(=O)C(=CO3)C4=CC(=C(C=C4)O)O)C=CC(O2)(C)C)C	[M+H]+	205.7508005	Organoheterocyclic compounds	drugCCS_ac7b01709_si_003.csv
95168	CC(=CCC1=C2C(=C3C(=C1O)C(=O)C(=CO3)C4=CC=C(C=C4)O)C=CC(O2)(C)C)C	[M+H]+	201.426371	Organoheterocyclic compounds	drugCCS_ac7b01709_si_003.csv
9917275	CC(=CCCC1(C=CC2=C(C3=C(C(=C2O1)CC=C(C)C)OC45C(C3=O)CC6CC4C(OC5(C6O)C/C=C(/C)\C(=O)O)(C)C)O)C)C	[M+H]+	246.445693	Organoheterocyclic compounds	drugCCS_ac7b01709_si_003.csv
6857794	CC(=CCCC1(C=CC2=C(C3=C(C(=C2O1)CC=C(C)C)OC45C(CCC=C4C3=O)C(O[C@@]5(C/C=C(\C)/C(=O)O)C(=O)O)(C)C)O)C)C	[M+H]+	245.7008696	Organoheterocyclic compounds	drugCCS_ac7b01709_si_003.csv
3873459	CC(=CCOC1=C(C=C2C=CC(=O)OC2=C1)O)C	[M+H]+	153.4718467	Benzenoids	drugCCS_ac7b01709_si_003.csv
9880	CC(=O)[C@]1(CC[C@@H]2[C@@]1(CC[C@H]3[C@H]2C=C(C4=CC(=O)[C@@H]5C[C@@H]5[C@]34C)Cl)C)OC(=O)C	[M+H]+	199.3676478	Lipids and lipid-like molecules	drugCCS_ac7b01709_si_003.csv
9324	CC(=O)[C@]1(CC[C@@H]2[C@@]1(CC[C@H]3[C@H]2C=C(C4=CC(=O)CC[C@]34C)Cl)C)OC(=O)C	[M+H]+	197.0256816	Lipids and lipid-like molecules	drugCCS_ac7b01709_si_003.csv
6238	CC(=O)[C@]1(CC[C@@H]2[C@@]1(CC[C@H]3[C@H]2CCC4=CC(=O)CC[C@]34C)C)O	[M+H]+	179.9423409	Lipids and lipid-like molecules	drugCCS_ac7b01709_si_003.csv
124933	CC(=O)[C@H]1CC[C@@H]2[C@@]1(CC([C@H]3[C@H]2CCC4=CC(=O)CC[C@]34C)OC(=O)CCC(=O)O)C	[M+H]+	201.8313201	Lipids and lipid-like molecules	drugCCS_ac7b01709_si_003.csv
5994	CC(=O)[C@H]1CC[C@@H]2[C@@]1(CC[C@H]3[C@H]2CCC4=CC(=O)CC[C@]34C)C	[M+H]+	177.7546814	Lipids and lipid-like molecules	drugCCS_ac7b01709_si_003.csv
16667715	CC(=O)[C@H]1CCC2[C@@]1(C[C@H](C3C2CCC4=CC(=O)CC[C@]34C)OC(=O)C)C	[M+H]+	190.5734312	Lipids and lipid-like molecules	drugCCS_ac7b01709_si_003.csv
529402	CC(=O)C1=C(C=C(C=C1)O)OC	[M+H]+	128.6062333	Benzenoids	drugCCS_ac7b01709_si_003.csv
11092	CC(=O)C1=C(C=C(C=C1)OC)O	[M+H]+	124.9428304	Benzenoids	drugCCS_ac7b01709_si_003.csv
68073	CC(=O)C1=C(C=C(C=C1O)O)O	[M+H]+	128.9908156	Benzenoids	drugCCS_ac7b01709_si_003.csv
24135	CC(=O)C1=C(C=C(C=C1O)OC)O	[M+H]+	130.5319176	Benzenoids	drugCCS_ac7b01709_si_003.csv
66654	CC(=O)C1=C(C=C(C=C1OC)OC)O	[M+H]+	135.8670587	Benzenoids	drugCCS_ac7b01709_si_003.csv
25134274	CC(=O)C1=CC[C@@H]2[C@@]1(C(=O)C[C@H]3[C@H]2CCC4[C@@]3(CCC(C4)OC(=O)C)C)C	[M+H]+	189.460412	Lipids and lipid-like molecules	drugCCS_ac7b01709_si_003.csv
1989	CC(=O)C1=CC=C(C=C1)S(=O)(=O)NC(=O)NC2CCCCC2	[M+H]+	178.1856665	Benzenoids	drugCCS_ac7b01709_si_003.csv
77553	CC(=O)C1=CC2=CC=CC=C2OC1=O	[M+H]+	131.609119	Benzenoids	drugCCS_ac7b01709_si_003.csv
54678486	CC(=O)CC(C1=CC=CC=C1)C2=C(C3=CC=CC=C3OC2=O)O	[M+H]+	165.8720749	Organoheterocyclic compounds	drugCCS_ac7b01709_si_003.csv
4409	CC(=O)CCC1=CC2=C(C=C1)C=C(C=C2)OC	[M+H]+	148.0325475	Benzenoids	drugCCS_ac7b01709_si_003.csv
4740	CC(=O)CCCCN1C(=O)C2=C(N=CN2C)N(C1=O)C	[M+H]+	158.5158878	Organoheterocyclic compounds	drugCCS_ac7b01709_si_003.csv
62881	CC(=O)N(CCCCCNC(=O)CCC(=O)N(CCCCCNC(=O)CCC(=O)N(CCCCCN)O)O)O.CS(=O)(=O)O	[M+H]+	221.3917571	Organic acids and derivatives	drugCCS_ac7b01709_si_003.csv
700653	CC(=O)N[C@@H](CC1=CNC2=CC=CC=C21)C(=O)O	[M+H]+	152.323789	Organoheterocyclic compounds	drugCCS_ac7b01709_si_003.csv
6167	CC(=O)N[C@H]1CCC2=CC(=C(C(=C2C3=CC=C(C(=O)C=C13)OC)OC)OC)OC	[M+H]+	194.482825	Organoheterocyclic compounds	drugCCS_ac7b01709_si_003.csv
456201	CC(=O)N1CCN(CC1)C2=CC=C(C=C2)OC[C@H]3CO[C@](O3)(CN4C=CN=C4)C5=C(C=C(C=C5)Cl)Cl	[M+H]+	214.5193539	Organoheterocyclic compounds	drugCCS_ac7b01709_si_003.csv
2140	CC(=O)NC1=C(C(=C(C(=C1I)C(=O)O)I)NC(=O)C)I	[M+H]+	176.2814715	Benzenoids	drugCCS_ac7b01709_si_003.csv
1985	CC(=O)NC1=C(C=CC(=C1)[As](=O)(O)O)O	[M+H]+	151.4897534	Benzenoids	drugCCS_ac7b01709_si_003.csv
12124	CC(=O)NC1=CC(=CC=C1)O	[M+H]+	130.5735561	Benzenoids	drugCCS_ac7b01709_si_003.csv
1983	CC(=O)NC1=CC=C(C=C1)O	[M+H]+	129.6889761	Benzenoids	drugCCS_ac7b01709_si_003.csv
17499	CC(=O)NC1=CC=C(C=C1)OC(=O)C	[M+H]+	143.0511021	Benzenoids	drugCCS_ac7b01709_si_003.csv
1984	CC(=O)NC1=CC=C(C=C1)OC(=O)C2=CC=CC=C2O	[M+H]+	168.1911603	Benzenoids	drugCCS_ac7b01709_si_003.csv
6477	CC(=O)NC1=CC=C(C=C1)S(=O)(=O)C2=CC=C(C=C2)NC(=O)C	[M+H]+	171.2187581	Benzenoids	drugCCS_ac7b01709_si_003.csv
5334	CC(=O)NC1=CC=C(C=C1)S(=O)(=O)NC2=CC=C(C=C2)[N+](=O)[O-]	[M+H]+	173.1613979	Benzenoids	drugCCS_ac7b01709_si_003.csv
904	CC(=O)NC1=CC=CC=C1	[M+H]+	124.9937828	Benzenoids	drugCCS_ac7b01709_si_003.csv
1986	CC(=O)NC1=NN=C(S1)S(=O)(=O)N	[M+H]+	140.7479254	Organic acids and derivatives	drugCCS_ac7b01709_si_003.csv
5491415	CC(=O)NCCC1=CC(=C(C=C1)O)C2=C(C3=C(C(=C2O)O)C(=O)C4=CC(=C(C(=C4C3=O)C(=O)O)C(=O)O)O)O	[M+H]+	218.5164812	Organoheterocyclic compounds	drugCCS_ac7b01709_si_003.csv
896	CC(=O)NCCC1=CNC2=C1C=C(C=C2)OC	[M+H]+	151.9648371	Organoheterocyclic compounds	drugCCS_ac7b01709_si_003.csv
5320	CC(=O)NS(=O)(=O)C1=CC=C(C=C1)N	[M+H]+	146.915661	Benzenoids	drugCCS_ac7b01709_si_003.csv
5702062	CC(=O)O.C1=CC(=C(C(=C1)Cl)/C=N/N=C(N)N)Cl	[M+H]+	147.8238766	Benzenoids	drugCCS_ac7b01709_si_003.csv
[truncated: 11,325 more rows]
