# Supplementary material for: Collision Cross Section Prediction with Molecular Fingerprint Using Machine Learning
Source: Molecules. 2022 Sep 29;27(19):6424. doi: 10.3390/molecules27196424 (PMC9572128; doi:10.3390/molecules27196424)
Supplement: Supplementary file 1 [file molecules-27-06424-s001.zip › molecules-1915961-supplementary.pdf]

---

# Supplementary Materials: Collision Cross Section Prediction with Molecular Fingerprint Using Machine Learning

Fan YANG <sup>1</sup>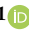<sup>\*</sup>, Denice van Herwerden <sup>2</sup>, Hugues Preud'Homme <sup>1</sup><sup>\*</sup> and Saer Samanipour<sup>2,3</sup>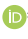<sup>\*</sup>

- Datasets used to generated prediction models and predicted CCS of susDat are available in Supplementary Table S1-S3 in Supplementary Table.zip. 1 2
- Decision trees were converted to DOT file to be easy visualize by Graphviz. The files can be accessed in DecisionTree.zip 3 4

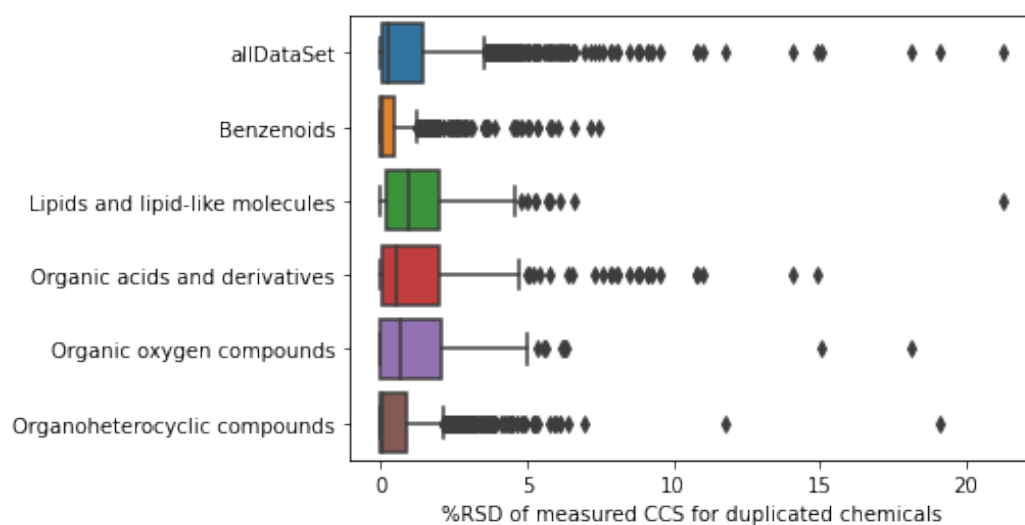

**Figure S1.** RSD of replicated chemicals: showed the relative standard deviation of CCS values measured from different laboratories. The median of RSD was below 2%, which confirmed the robustness of CCS measurement cross platforms and the possibility to merge all the dataset for Machine learning.

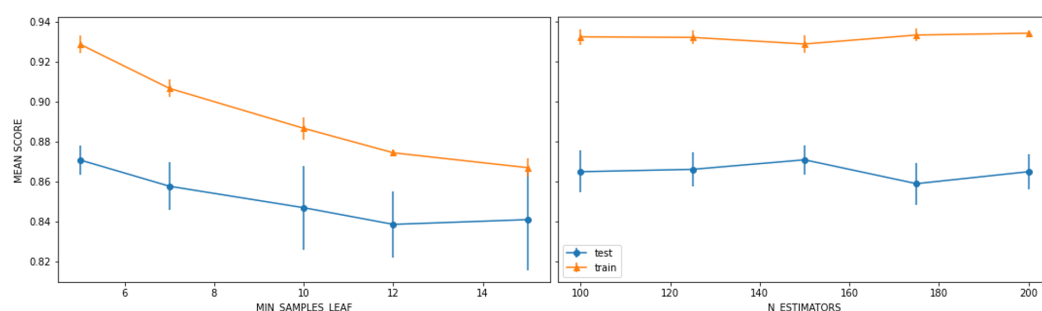

**Figure S2.** Classification GridSearchCV scores. Classification modeling scores of hyper-parameters optimization by GridSearchCV with 5 CV

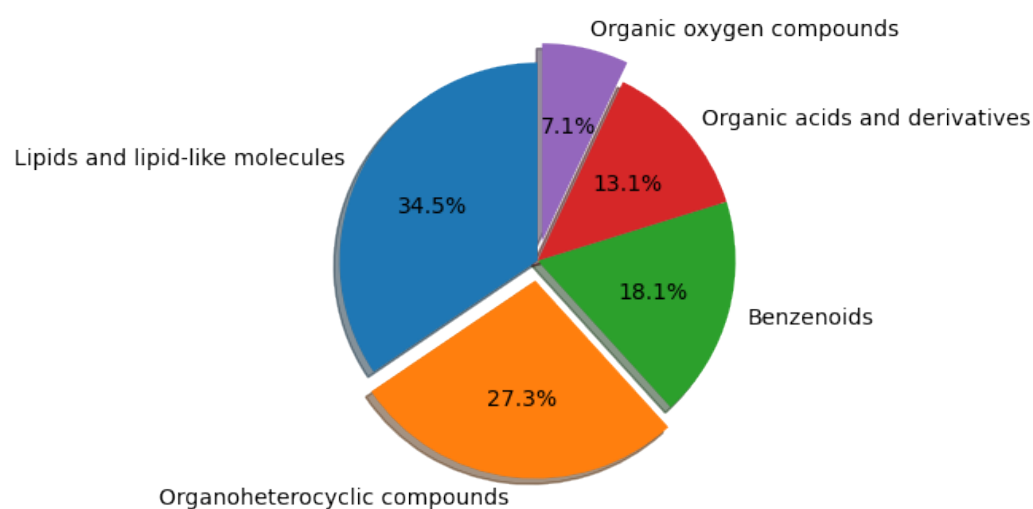

**Figure S3.** Distribution of predicted super class

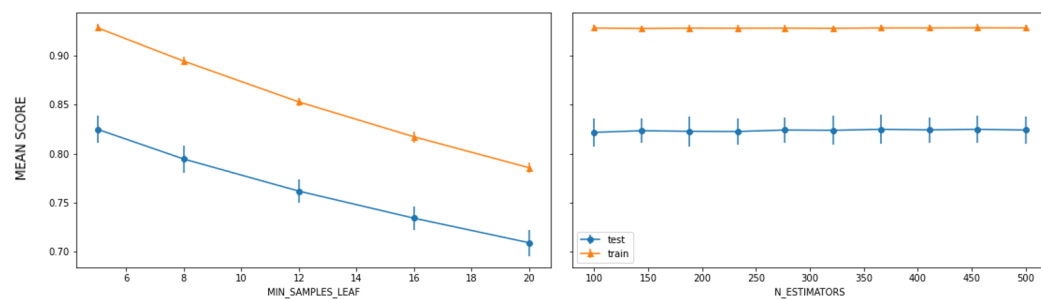

(a) Benzenoids

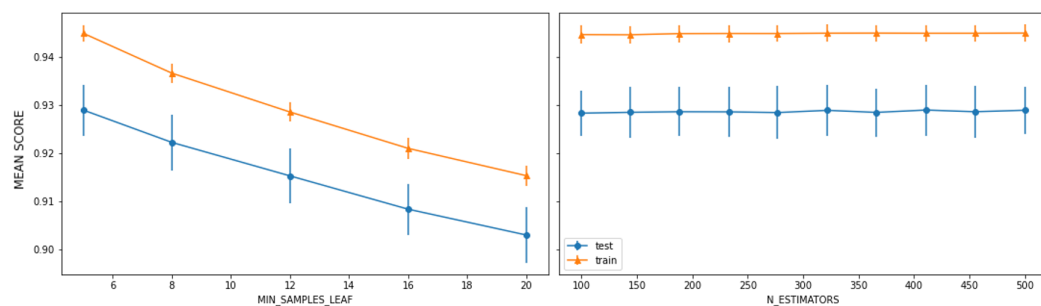

(b) Lipids and lipid-like molecules

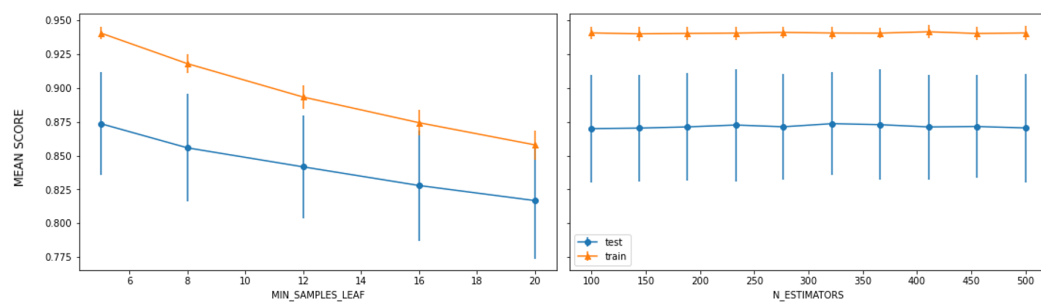

(c) Organic acids and derivatives

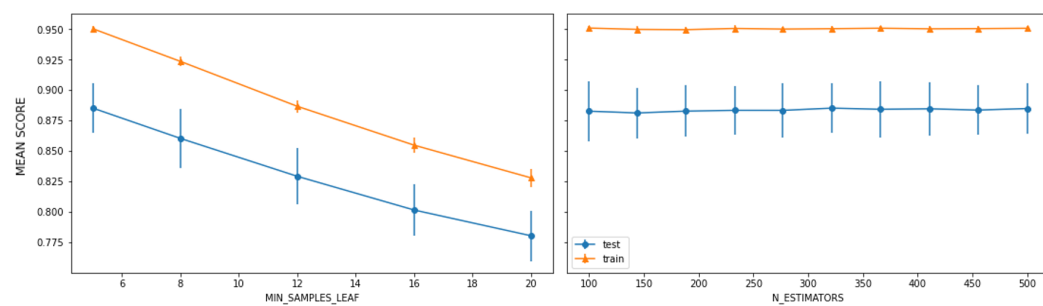

(d) Organic oxygen compounds

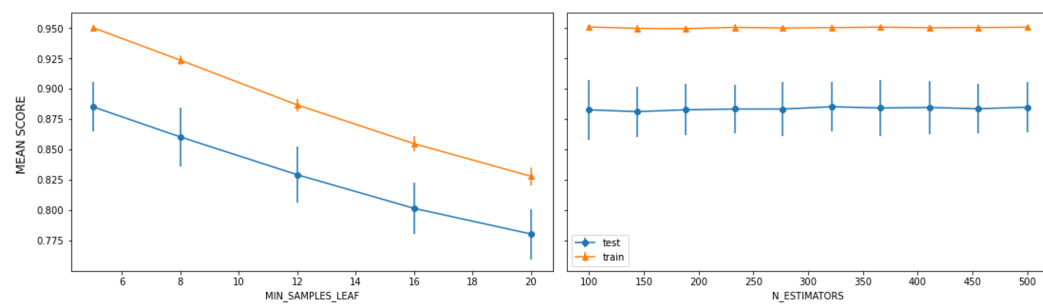

(e) Organoheterocyclic compounds

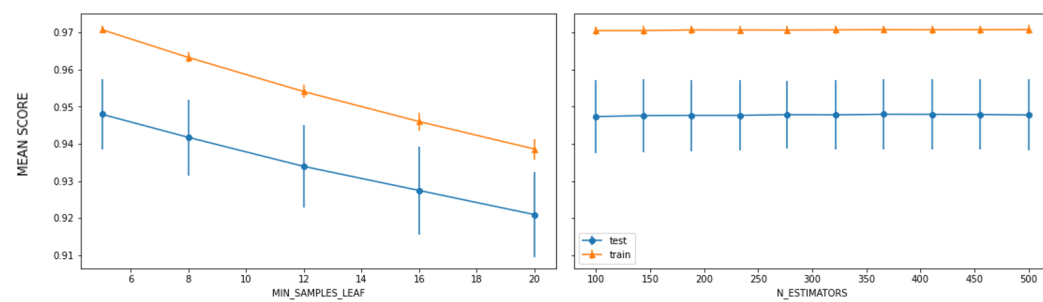

(f) Direct CCS prediction

**Figure S4.** Regression modeling scores of hyper-parameters optimization by GridSearchCV: Class-based CCS prediction model(a-e) and direct CCS prediction (f)

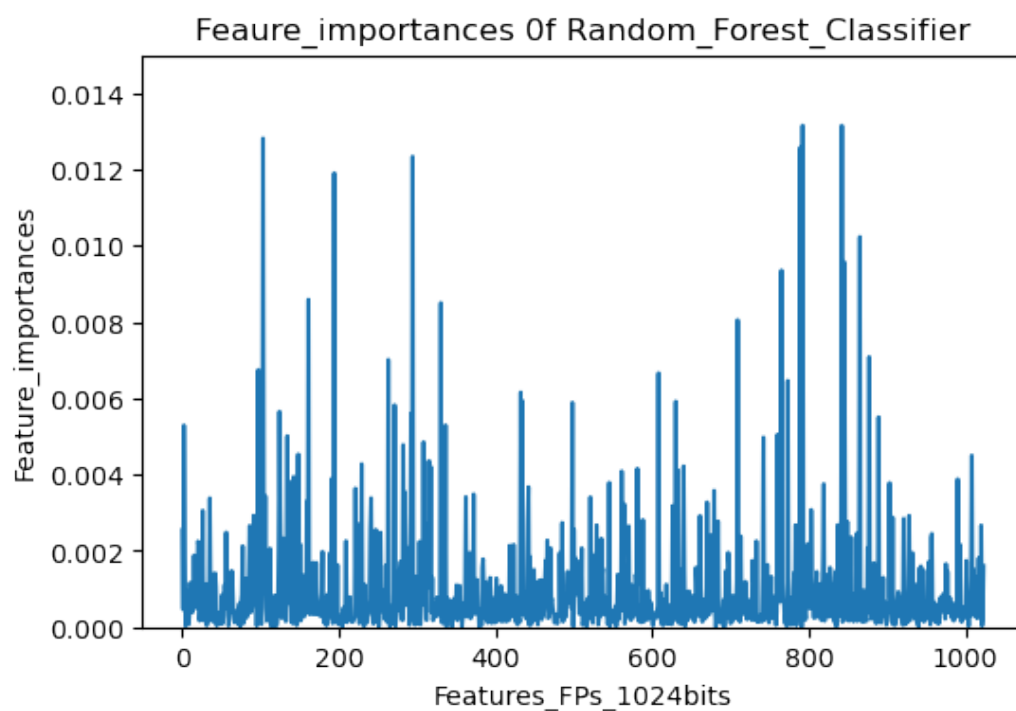

**Figure S5.** Feature Importance of classification model

| CID      | Mol | Data Source    | CCS      | Predicted Class               | Predicted CCS(Direct) | %Res     | PredictedCCS (ClassBased) | %Res |
|----------|-----|----------------|----------|-------------------------------|-----------------------|----------|---------------------------|------|
| 440995   |     | metabolitedata | 170.2333 | Benzenoids                    | 226.5948              | 33.1     | 234.707                   | 37.9 |
| 54683011 |     | CCSbase        | 135      | Organic acids and derivatives | 260.6                 | 93.1     | 181.7                     | 34.6 |
| 7904     |     | CCSbase        | 227.2    | Organic acids and derivatives | 127.4                 | 43.9     | 147.9                     | 34.8 |
| 14819046 |     | CCSbase        | 390.3    | Organic oxygen compounds      | 226.6                 | 41.9     | 234.7                     | 39.9 |
| 440995   |     | metabolitedata | 170.2    | Organic oxygen compounds      | 226                   | 33.1     | 234.7                     | 37.9 |
| 52928607 |     | CCSbase        | 237.01   | Organic oxygen compounds      | 165.926               | 29.99197 | 235.4574                  | 0.65 |

**Figure S6.** Outliers with predicted Class, predicted CCS by Class-based and direct models

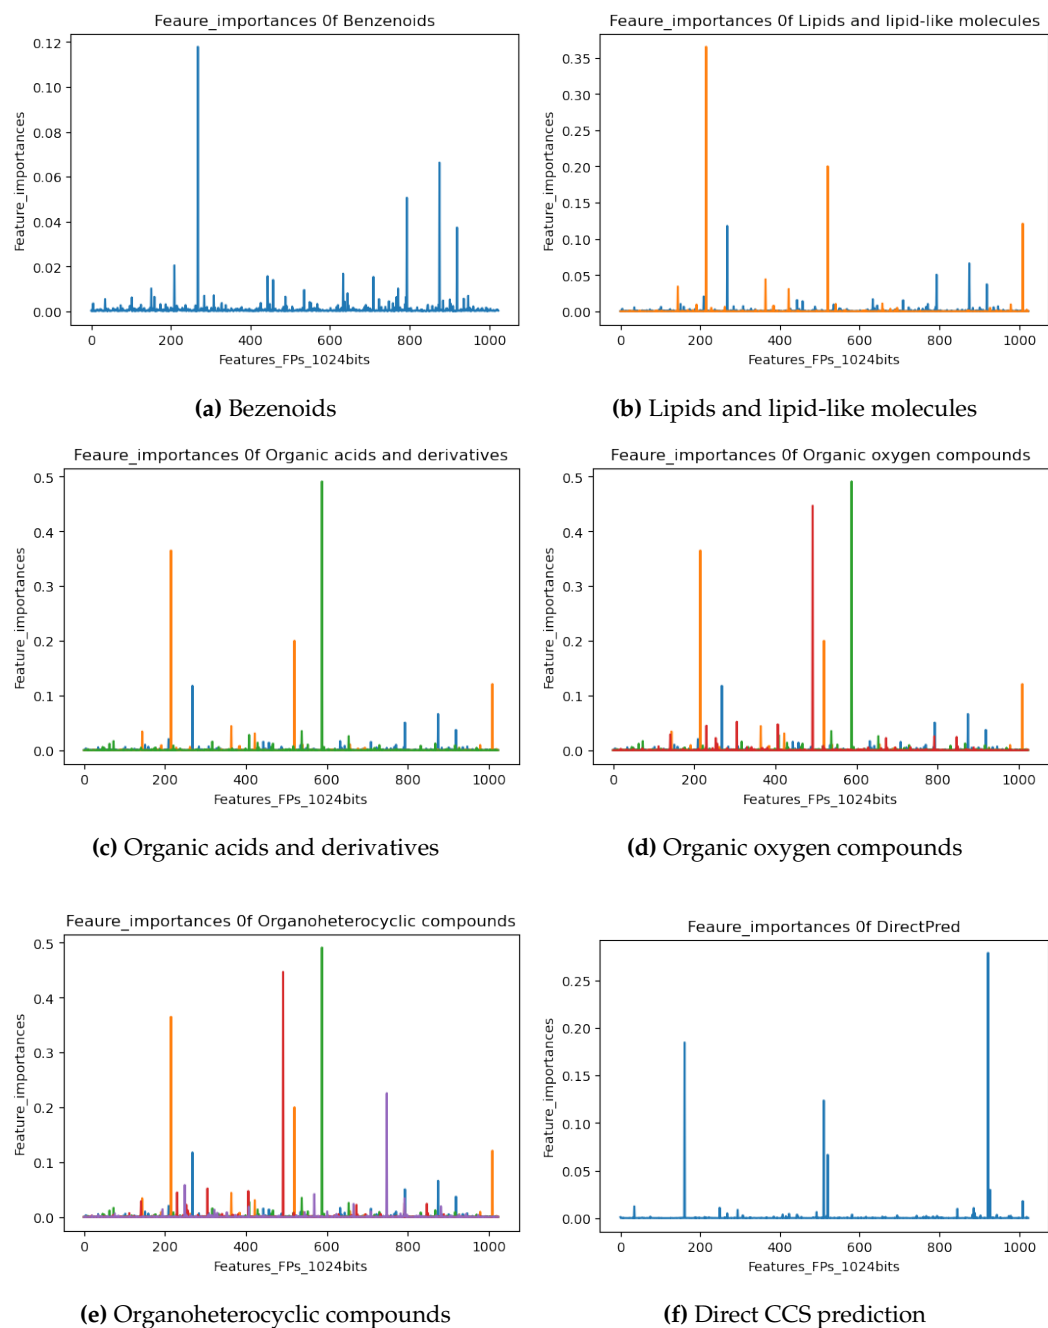

**Figure S7.** Regression modeling Feature Importances: Class-based CCS prediction model(a-e) and direct CCS prediction (f). Common features were obtained the highest scores in different predicted class and direct CCS prediction

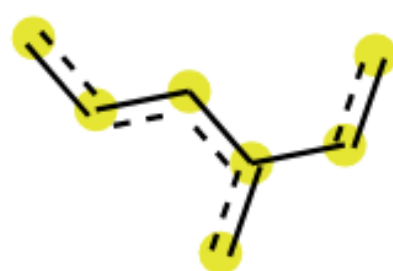

(a) bit748

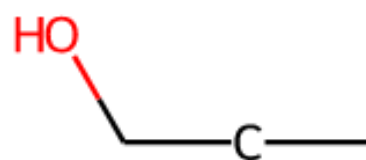

(b) bit209

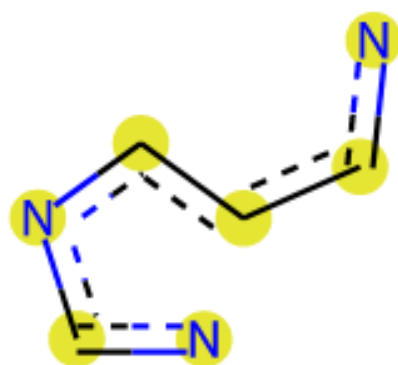

(c) bit492

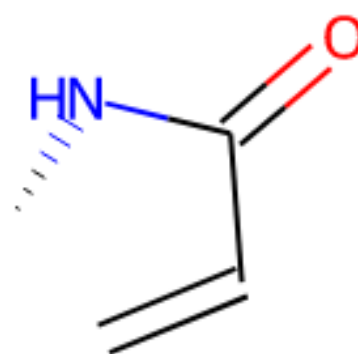

(d) bit588

**Figure S8.** Example of most relevant features: Substructure example of common features plotted in Figure S7 for predicted class and direct CCS prediction
