# Supplementary material for: Collision Cross Section Prediction with Molecular Fingerprint Using Machine Learning
Source: Molecules. 2022 Sep 29;27(19):6424. doi: 10.3390/molecules27196424 (PMC9572128; doi:10.3390/molecules27196424)
Supplement: Supplementary file 1 [file molecules-27-06424-s001.zip › SuperClassModeling.csv]

name	formula	CID	SMILES	adduct	CCS	Super.Class	Class	Subclass	Source
Meso-tartrate	C4H606	447315	[C@@H]([C@@H](C(=O)O)O)(C(=O)O)O	[M-H]	118.4	Organic acids and derivatives	Hydroxy acids and derivatives	Beta hydroxy acids and derivatives	20190304JAP_CCSdatabase_final.csv
L-(+)-Tartartic Acid	C4H6O6	444305	[C@@H]([C@H](C(=O)O)O)(C(=O)O)O	[M-H]	118.3	Organic acids and derivatives	Hydroxy acids and derivatives	Beta hydroxy acids and derivatives	20190304JAP_CCSdatabase_final.csv
trans-Aconitic Acid	C6H6O6	444212	C(/C(=C\C(=O)O)/C(=O)O)C(=O)O	[M-H]	131.4	Organic acids and derivatives	Carboxylic acids and derivatives	Tricarboxylic acids and derivatives	20190304JAP_CCSdatabase_final.csv
2-Keto-3-deoxy-D-gluconic Acid Lithium Salt	C6H11O6	161227	C([C@@H]([C@@H](CO)O)O)C(=O)C(=O)O	[M-H]	133.9	Organic acids and derivatives	Keto acids and derivatives	Medium-chain keto acids and derivatives	20190304JAP_CCSdatabase_final.csv
3-Deoxy-2-keto-6-phosphogluconic Acid Lithium Salt	C6H11O9P	3080745	C([C@@H]([C@@H](COP(=O)(O)O)O)O)C(=O)C(=O)O	[M-H]	143.6	Organic acids and derivatives	Organic acids and derivatives	Medium-chain keto acids and derivatives	20190304JAP_CCSdatabase_final.csv
L-Threonic Acid Lithium salt	C4H9O5	5460407	C([C@@H]([C@H](C(=O)O)O)O)O	[M-H]	121.8	Organic acids and derivatives	Carboxylic acids and derivatives	Amino acids, peptides, and analogues	20190304JAP_CCSdatabase_final.csv
L-Asparagine	C4H8N2O3	6267	C([C@@H](C(=O)O)N)C(=O)N	[M-H]	124.2	Organic acids and derivatives	Carboxylic acids and derivatives	Amino acids, peptides, and analogues	20190304JAP_CCSdatabase_final.csv
L-Aspartic Acid	C4H7NO4	5960	C([C@@H](C(=O)O)N)C(=O)O	[M-H]	119.8	Organic acids and derivatives	Carboxylic acids and derivatives	Amino acids, peptides, and analogues	20190304JAP_CCSdatabase_final.csv
L-Serine	C3H7NO3	5951	C([C@@H](C(=O)O)N)O	[M-H]	136.2	Organic acids and derivatives	Carboxylic acids and derivatives	Amino acids, peptides, and analogues	20190304JAP_CCSdatabase_final.csv
Phosphoserine	C3H8NO6P	68841	C([C@@H](C(=O)O)N)OP(=O)(O)O	[M-H]	127.8	Organic acids and derivatives	Carboxylic acids and derivatives	Amino acids, peptides, and analogues	20190304JAP_CCSdatabase_final.csv
L-Cysteine	C3H7NO2S	5862	C([C@@H](C(=O)O)N)S	[M-H]	144	Organic acids and derivatives	Carboxylic acids and derivatives	Amino acids, peptides, and analogues	20190304JAP_CCSdatabase_final.csv
Cysteate	C3H7NO5S	12308854	C([C@@H](C(=O)O)N)S(=O)(=O)O.O	[M-H]	123.3	Organic acids and derivatives	Carboxylic acids and derivatives	Amino acids, peptides, and analogues	20190304JAP_CCSdatabase_final.csv
(S)-Carboxymethylcysteine	C5H9NO4S	193653	C([C@@H](C(=O)O)N)SCC(=O)O	[M-H]	130	Organic acids and derivatives	Carboxylic acids and derivatives	Amino acids, peptides, and analogues	20190304JAP_CCSdatabase_final.csv
L-Cystine	C6H12N2O4S2	67678	C([C@@H](C(=O)O)N)SSC[C@@H](C(=O)O)N	[M-H]	143.3	Organic acids and derivatives	Carboxylic acids and derivatives	Amino acids, peptides, and analogues	20190304JAP_CCSdatabase_final.csv
Guanidinosuccinate	C5H9N3O4	439918	C([C@@H](C(=O)O)N=C(N)N)C(=O)O	[M-H]	130.4	Organic acids and derivatives	Carboxylic acids and derivatives	Amino acids, peptides, and analogues	20190304JAP_CCSdatabase_final.csv
D-Aspartic Acid	C4H7NO4	83887	C([C@H](C(=O)O)N)C(=O)O	[M-H]	120.1	Organic acids and derivatives	Carboxylic acids and derivatives	Amino acids, peptides, and analogues	20190304JAP_CCSdatabase_final.csv
Trifluoroacetic Acid	CF3COOH	71299604	C(=O)(C(F)(F)F)[O-].[NH2+]	[M-H]	108.4	Organic acids and derivatives	Carboxylic acids and derivatives	Alpha-halocarboxylic acids and derivatives	20190304JAP_CCSdatabase_final.csv
Sodium Citrate Dihydrate	HOC(COONa)(CH2COONa)2	71474	C(C(=O)[O-])C(CC(=O)[O-])(C(=O)[O-])O.O.O.[Na+].[Na+].[Na+]	[M-H]	129	Organic acids and derivatives	Carboxylic acids and derivatives	Tricarboxylic acids and derivatives	20190304JAP_CCSdatabase_final.csv
Citrate	C6H8O7	311	C(C(=O)O)C(CC(=O)O)(C(=O)O)O	[M-H]	127.4	Organic acids and derivatives	Carboxylic acids and derivatives	Tricarboxylic acids and derivatives	20190304JAP_CCSdatabase_final.csv
Guanidinoacetate	C3H7N3O2	763	C(C(=O)O)N=C(N)N	[M+H]	125.4	Organic acids and derivatives	Carboxylic acids and derivatives	Amino acids, peptides, and analogues	20190304JAP_CCSdatabase_final.csv
Glyphospate	C3H8NO5P	3496	C(C(=O)O)NCP(=O)(O)O	[M-H]	128.6	Organic acids and derivatives	Carboxylic acids and derivatives	Amino acids, peptides, and analogues	20190304JAP_CCSdatabase_final.csv
2,3-Diaminopropionate	C3H8N2O2	108638	C(C(C(=O)O)N)N.Cl	[M-H]	118.5	Organic acids and derivatives	Carboxylic acids and derivatives	Amino acids, peptides, and analogues	20190304JAP_CCSdatabase_final.csv
3-Sulfinoalanine	C3H7NO4S	109	C(C(C(=O)O)N)S(=O)O	[M+H]	133.4	Organic acids and derivatives	Carboxylic acids and derivatives	Amino acids, peptides, and analogues	20190304JAP_CCSdatabase_final.csv
Isocitrate	C6H8O7	168942	C(C(C(C(=O)[O-])O)C(=O)[O-])C(=O)[O-].[Na+].[Na+].[Na+]	[M-H]	127.3	Organic acids and derivatives	Carboxylic acids and derivatives	Tricarboxylic acids and derivatives	20190304JAP_CCSdatabase_final.csv
2,6-Diaminopimelate	C7H14N2O4	439283	C(C[C@@H](C(=O)O)N)C[C@@H](C(=O)O)N	[M-H]	138.2	Organic acids and derivatives	Carboxylic acids and derivatives	Amino acids, peptides, and analogues	20190304JAP_CCSdatabase_final.csv
L-alpha-Aminoadipate	C6H11NO4	92136	C(C[C@@H](C(=O)O)N)CC(=O)O	[M-H]	130.8	Organic acids and derivatives	Carboxylic acids and derivatives	Amino acids, peptides, and analogues	20190304JAP_CCSdatabase_final.csv
L-Arginine	C6H14N4O2	6322	C(C[C@@H](C(=O)O)N)CN=C(N)N	[M-H]	137.2	Organic acids and derivatives	Carboxylic acids and derivatives	Amino acids, peptides, and analogues	20190304JAP_CCSdatabase_final.csv
Citrulline	C6H13N3O3	9750	C(C[C@@H](C(=O)O)N)CNC(=O)N	[M-H]	135.5	Organic acids and derivatives	Carboxylic acids and derivatives	Amino acids, peptides, and analogues	20190304JAP_CCSdatabase_final.csv
Selenocystamine	C4H12N2Se2	115119	C(C[Se][Se]CCN)N	[M+H]	135.9	Organic acids and derivatives	Carboxylic acids and derivatives	Amino acids, peptides, and analogues	20190304JAP_CCSdatabase_final.csv
Oxoglutarate	C5H6O5	31040	C(CC(=O)[O-])C(=O)C(=O)[O-].[Na+].[Na+]	[M-H]	121.1	Organic acids and derivatives	Keto acids and derivatives	Gamma-keto acids and derivatives	20190304JAP_CCSdatabase_final.csv
Oxoadipate	C6H8O5	71	C(CC(=O)C(=O)O)CC(=O)O	[M-H]	126.8	Organic acids and derivatives	Keto acids and derivatives	Medium-chain keto acids and derivatives	20190304JAP_CCSdatabase_final.csv
Glutamine	C5H10N2O3	5961	C(CC(=O)N)[C@@H](C(=O)O)N	[M-H]	127.7	Organic acids and derivatives	Carboxylic acids and derivatives	Amino acids, peptides, and analogues	20190304JAP_CCSdatabase_final.csv
Glutathione (Reduced)	C10H17N3O6S	124886	C(CC(=O)N[C@@H](CS)C(=O)NCC(=O)O)[C@@H](C(=O)O)N	[M-H]	162.8	Organic acids and derivatives	Carboxylic acids and derivatives	Amino acids, peptides, and analogues	20190304JAP_CCSdatabase_final.csv
L-Glutamic Acid	C5H9NO4	33032	C(CC(=O)O)[C@@H](C(=O)O)N	[M-H]	125.1	Organic acids and derivatives	Carboxylic acids and derivatives	Amino acids, peptides, and analogues	20190304JAP_CCSdatabase_final.csv
alpha-Ketoglutaric Acid	C5H6O5	51	C(CC(=O)O)C(=O)C(=O)O	[M-H]	125.2	Organic acids and derivatives	Keto acids and derivatives	Gamma-keto acids and derivatives	20190304JAP_CCSdatabase_final.csv
5-Aminolevulinate	C5H9NO3	137	C(CC(=O)O)C(=O)CN	[M+H]	130.7	Organic acids and derivatives	Carboxylic acids and derivatives	Amino acids, peptides, and analogues	20190304JAP_CCSdatabase_final.csv
Succinic acid	C4H6O4	1110	C(CC(=O)O)C(=O)O	[M-H]	119.1	Organic acids and derivatives	Carboxylic acids and derivatives	Dicarboxylic acids and derivatives	20190304JAP_CCSdatabase_final.csv
Glutarate	C5H8O4	743	C(CC(=O)O)CC(=O)O	[M-H]	121.7	Organic acids and derivatives	Carboxylic acids and derivatives	Dicarboxylic acids and derivatives	20190304JAP_CCSdatabase_final.csv
L-Ornithine Monohydrochloride	C5H12N2O2	389	C(CC(C(=O)O)N)CN	[M-H]	136.3	Organic acids and derivatives	Carboxylic acids and derivatives	Amino acids, peptides, and analogues	20190304JAP_CCSdatabase_final.csv
omega-Hydroxydodecanoate	C12H24O3	79034	C(CCCCCC(=O)O)CCCCCO	[M-H]	152.7	Organic acids and derivatives	Hydroxy acids and derivatives	Medium-chain hydroxy acids and derivatives	20190304JAP_CCSdatabase_final.csv
L-Lysine	C6H14N2O2	5962	C(CCN)C[C@@H](C(=O)O)N	[M-H]	135.9	Organic acids and derivatives	Carboxylic acids and derivatives	Amino acids, peptides, and analogues	20190304JAP_CCSdatabase_final.csv
Homoserine	C4H9NO3	12647	C(CO)[C@@H](C(=O)O)N	[M-H]	120.8	Organic acids and derivatives	Carboxylic acids and derivatives	Amino acids, peptides, and analogues	20190304JAP_CCSdatabase_final.csv
O-Succinyl-homoserine	C8H13NO6	439406	C(COC(=O)CCC(=O)O)[C@@H](C(=O)O)N	[M+H]	146.2	Organic acids and derivatives	Carboxylic acids and derivatives	Amino acids, peptides, and analogues	20190304JAP_CCSdatabase_final.csv
O-Phosphoethanolamine	C2H8NO4P	1015	C(COP(=O)(O)O)N	[M-H]	123.4	Organic acids and derivatives	Organic phosphonic acids and derivatives	Phosphate esters	20190304JAP_CCSdatabase_final.csv
(2-Aminoethyl)phosphonate	C2H8NO3P	339	C(CP(=O)(O)O)N	[M-H]	120.3	Organic acids and derivatives	Organic phosphonic acids and derivatives	Organic phosphonic acids	20190304JAP_CCSdatabase_final.csv
Tris(2-carboxyethyl)phosphine Hydrochloride	C9H17O6P	2734570	C(CP(CCC(=O)O)CCC(=O)O)C(=O)O.Cl	[M-H]	149.1	Organic acids and derivatives	Carboxylic acids and derivatives	Tricarboxylic acids and derivatives	20190304JAP_CCSdatabase_final.csv
Taurine	C2H7NO3S	1123	C(CS(=O)(=O)O)N	[M-H]	118.5	Organic acids and derivatives	Organic sulfonic acids and derivatives	Organosulfonic acids and derivatives	20190304JAP_CCSdatabase_final.csv
Hypotaurine	C2H7NO2S	107812	C(CS(=O)O)N	[M-H]	132.9	Organic acids and derivatives	Sulfinic acids and derivatives	Sulfinic acids	20190304JAP_CCSdatabase_final.csv
Homocysteine	C4H9NO2S	778	C(CS)C(C(=O)O)N	[M-H]	143.8	Organic acids and derivatives	Carboxylic acids and derivatives	Amino acids, peptides, and analogues	20190304JAP_CCSdatabase_final.csv
L-Cystathionine	C7H14N2O4S	439258	C(CSC[C@@H](C(=O)O)N)[C@@H](C(=O)O)N	[M-H]	142.1	Organic acids and derivatives	Carboxylic acids and derivatives	Amino acids, peptides, and analogues	20190304JAP_CCSdatabase_final.csv
DL-Cystathionine	C7H14N2O4S	834	C(CSCC(C(=O)O)N)C(C(=O)O)N	[M-H]	143.9	Organic acids and derivatives	Carboxylic acids and derivatives	Amino acids, peptides, and analogues	20190304JAP_CCSdatabase_final.csv
Homocystine	C8H16N2O4S2	10010	C(CSSCCC(C(=O)O)N)C(C(=O)O)N	[M-H]	151.7	Organic acids and derivatives	Carboxylic acids and derivatives	Amino acids, peptides, and analogues	20190304JAP_CCSdatabase_final.csv
Tiglyl Glycine	C7H11NO3	6441567	C/C=C(\C)/C(=O)NCC(=O)O	[M-H]	142.4	Organic acids and derivatives	Carboxylic acids and derivatives	Amino acids, peptides, and analogues	20190304JAP_CCSdatabase_final.csv
allo-Threonine	C4H9NO3	99289	C[C@@H]([C@@H](C(=O)O)N)O	[M-H]	119.7	Organic acids and derivatives	Carboxylic acids and derivatives	Amino acids, peptides, and analogues	20190304JAP_CCSdatabase_final.csv
L-Threonine	C4H9NO3	6288	C[C@H]([C@@H](C(=O)O)N)O	[M-H]	129.2	Organic acids and derivatives	Carboxylic acids and derivatives	Amino acids, peptides, and analogues	20190304JAP_CCSdatabase_final.csv
Betaine	C5H11NO2	247	C[N+](C)(C)CC(=O)[O-]	[M+H]	121.1	Organic acids and derivatives	Carboxylic acids and derivatives	Amino acids, peptides, and analogues	20190304JAP_CCSdatabase_final.csv
N,N,N-Trimethyllysine	C9H20N2O2	159660	C[N+](C)(C)CCCCC(C(=O)O)N	[M+H]	141.8	Organic acids and derivatives	Carboxylic acids and derivatives	Amino acids, peptides, and analogues	20190304JAP_CCSdatabase_final.csv
(S)-Adenosyl-L-methionine	C15H22N6O5S	34755	C[S+](CC[C@@H](C(=O)[O-])N)C[C@@H]1[C@H]([C@H]([C@@H](O1)N2C=NC3=C(N=CN=C32)N)O)O	[M+H]	185.6	Organic acids and derivatives	Carboxylic acids and derivatives	Amino acids, peptides, and analogues	20190304JAP_CCSdatabase_final.csv
Selenomethionine	C5H11NO2Se	105024	C[Se]CC[C@@H](C(=O)O)N	[M-H]	150	Organic acids and derivatives	Carboxylic acids and derivatives	Amino acids, peptides, and analogues	20190304JAP_CCSdatabase_final.csv
Phosphoenol Pyruvate Monopotassium Salt	C3H4KO6P	77950	C=C(C(=O)O)OP(=O)(O)[O-].[K+]	[M-H]	163.7	Organic acids and derivatives	Organic phosphonic acids and derivatives	Phosphate esters	20190304JAP_CCSdatabase_final.csv
trans-4-Hydroxy-L-proline	C5H9NO3	5810	C1[C@H](CN[C@@H]1C(=O)O)O	[M-H]	126.7	Organic acids and derivatives	Carboxylic acids and derivatives	Amino acids, peptides, and analogues	20190304JAP_CCSdatabase_final.csv
cis-4-Hydroxy-D-proline	C5H9NO3	440014	C1[C@H](CN[C@H]1C(=O)O)O	[M-H]	124.6	Organic acids and derivatives	Carboxylic acids and derivatives	Amino acids, peptides, and analogues	20190304JAP_CCSdatabase_final.csv
(S)-Dihydroorotic Acid	C5H6N2O4	439216	C1[C@H](NC(=O)NC1=O)C(=O)O	[M-H]	125.5	Organic acids and derivatives	Carboxylic acids and derivatives	Amino acids, peptides, and analogues	20190304JAP_CCSdatabase_final.csv
3,5-Diiodo-L-tyrosine	C9H9I2NO3	6181	C1=C(C=C(C(=C1I)O)I)CC(C(=O)O)N	[M-H]	159.4	Organic acids and derivatives	Carboxylic acids and derivatives	Amino acids, peptides, and analogues	20190304JAP_CCSdatabase_final.csv
Thyroxine	C15H11I4NO4	5819	C1=C(C=C(C(=C1I)OC2=CC(=C(C(=C2)I)O)I)I)C[C@@H](C(=O)O)N	[M-H]	208	Organic acids and derivatives	Carboxylic acids and derivatives	Amino acids, peptides, and analogues	20190304JAP_CCSdatabase_final.csv
L-Histidine	C6H9N3O2	6274	C1=C(NC=N1)C[C@@H](C(=O)O)N	[M-H]	128.9	Organic acids and derivatives	Carboxylic acids and derivatives	Amino acids, peptides, and analogues	20190304JAP_CCSdatabase_final.csv
L-Histidine Monohydrocholride Monohydrate	C6H9N3O2	165377	C1=C(NC=N1)C[C@@H](C(=O)O)N.O.Cl	[M-H]	128.6	Organic acids and derivatives	Carboxylic acids and derivatives	Amino acids, peptides, and analogues	20190304JAP_CCSdatabase_final.csv
Carnosine	C9H14N4O3	439224	C1=C(NC=N1)C[C@@H](C(=O)O)NC(=O)CCN	[M-H]	153.1	Organic acids and derivatives	Peptidomimetics	Hybrid peptides	20190304JAP_CCSdatabase_final.csv
3,4-Dihydroxy-L-phenylalanine	C9H11NO4	6047	C1=CC(=C(C=C1C[C@@H](C(=O)O)N)O)O	[M-H]	142.2	Organic acids and derivatives	Carboxylic acids and derivatives	Amino acids, peptides, and analogues	20190304JAP_CCSdatabase_final.csv
Liothyronine	C15H12I3NO4	16218759	C1=CC(=C(C=C1OC2=C(C=C(C=C2I)C[C@@H](C(=O)[O-])N)I)I)O.O.[Na+]	[M+H]	209.3	Organic acids and derivatives	Carboxylic acids and derivatives	Amino acids, peptides, and analogues	20190304JAP_CCSdatabase_final.csv
Folate	C19H19N7O6	6037	C1=CC(=CC=C1C(=O)N[C@@H](CCC(=O)O)C(=O)O)NCC2=CN=C3C(=N2)C(=O)N=C(N3)N	[M-H]	192.1	Organic acids and derivatives	Carboxylic acids and derivatives	Amino acids, peptides, and analogues	20190304JAP_CCSdatabase_final.csv
L-Tyrosine	C9H11NO3	6057	C1=CC(=CC=C1C[C@@H](C(=O)O)N)O	[M-H]	144.5	Organic acids and derivatives	Carboxylic acids and derivatives	Amino acids, peptides, and analogues	20190304JAP_CCSdatabase_final.csv
3,5-Diiodo-L-thryonine	C15H13I2NO4	92859	C1=CC(=CC=C1O)OC2=C(C=C(C=C2I)C[C@@H](C(=O)O)N)I	[M-H]	188.2	Organic acids and derivatives	Carboxylic acids and derivatives	Amino acids, peptides, and analogues	20190304JAP_CCSdatabase_final.csv
N-(3-Phenylpropionyl)-glycine	C11H13NO3	1608346	C1=CC=C(C=C1)C(=O)CC[NH2+]CC(=O)[O-]	[M-H]	160.2	Organic acids and derivatives	Carboxylic acids and derivatives	Amino acids, peptides, and analogues	20190304JAP_CCSdatabase_final.csv
L-Phenylalanine	C9H11NO2	6140	C1=CC=C(C=C1)C[C@@H](C(=O)O)N	[M-H]	140.1	Organic acids and derivatives	Carboxylic acids and derivatives	Amino acids, peptides, and analogues	20190304JAP_CCSdatabase_final.csv
Phenylacetyl-L-glutamine	C13H16N2O4	92258	C1=CC=C(C=C1)CC(=O)N[C@@H](CCC(=O)N)C(=O)O	[M-H]	168.6	Organic acids and derivatives	Carboxylic acids and derivatives	Amino acids, peptides, and analogues	20190304JAP_CCSdatabase_final.csv
Indoxyl Sulfate	C8H6NO4S	17530	C1=CC=C2C(=C1)C(=CN2)OS(=O)(=O)[O-].[K+]	[M-H]	143.4	Organic acids and derivatives	Organic sulfonic acids and derivatives	Arylsulfates	20190304JAP_CCSdatabase_final.csv
Dihydrofolate	C19H21N7O6	98792	C1C(=NC2=C(N1)NC(=NC2=O)N)CNC3=CC=C(C=C3)C(=O)N[C@@H](CCC(=O)O)C(=O)O	[M+H]	192.4	Organic acids and derivatives	Carboxylic acids and derivatives	Amino acids, peptides, and analogues	20190304JAP_CCSdatabase_final.csv
Dihydrofolate	C19H21N7O6	71311277	C1C(=NC2=C(N1)NC(=NC2=O)N)CNC3=CC=C(C=C3)C(=O)N[C@@H](CCC(=O)O)C(=O)O.O.O	[M-H]	192	Organic acids and derivatives	Carboxylic acids and derivatives	Amino acids, peptides, and analogues	20190304JAP_CCSdatabase_final.csv
Bradykinin	C50H73N15O11	439201	C1C[C@H](N(C1)C(=O)[C@@H]2CCCN2C(=O)[C@H](CCCN=C(N)N)N)C(=O)NCC(=O)N[C@@H](CC3=CC=CC=C3)C(=O)N[C@@H](CO)C(=O)N4CCC[C@H]4C(=O)N[C@@H](CC5=CC=CC=C5)C(=O)N[C@@H](CCCN=C(N)N)C(=O)O	[M+H]	314.6	Organic acids and derivatives	Carboxylic acids and derivatives	Amino acids, peptides, and analogues	20190304JAP_CCSdatabase_final.csv
Thyrotropin Releasing Hormone	C16H22N6O4	638678	C1C[C@H](N(C1)C(=O)[C@H](CC2=CN=CN2)NC(=O)[C@@H]3CCC(=O)N3)C(=O)N	[M-H]	185.9	Organic acids and derivatives	Carboxylic acids and derivatives	Amino acids, peptides, and analogues	20190304JAP_CCSdatabase_final.csv
L-Proline	C5H9NO2	145742	C1C[C@H](NC1)C(=O)O	[M-H]	125.1	Organic acids and derivatives	Carboxylic acids and derivatives	Amino acids, peptides, and analogues	20190304JAP_CCSdatabase_final.csv
Pyroglutamate	C5H7NO3	7405	C1CC(=O)N[C@@H]1C(=O)O	[M-H]	124.6	Organic acids and derivatives	Carboxylic acids and derivatives	Amino acids, peptides, and analogues	20190304JAP_CCSdatabase_final.csv
Oxoproline	C5H7NO3	439685	C1CC(=O)N[C@H]1C(=O)O	[M-H]	124.6	Organic acids and derivatives	Carboxylic acids and derivatives	Amino acids, peptides, and analogues	20190304JAP_CCSdatabase_final.csv
1-Aminocyclopropanecarboxylate	C4H7NO2	535	C1CC1(C(=O)O)N	[M-H]	135.6	Organic acids and derivatives	Carboxylic acids and derivatives	Amino acids, peptides, and analogues	20190304JAP_CCSdatabase_final.csv
L-Pipecolate	C6H11NO2	439227	C1CCN[C@@H](C1)C(=O)O	[M-H]	128.9	Organic acids and derivatives	Carboxylic acids and derivatives	Amino acids, peptides, and analogues	20190304JAP_CCSdatabase_final.csv
DL-Pipecolate	C6H11NO2	849	C1CCNC(C1)C(=O)O	[M-H]	129.3	Organic acids and derivatives	Carboxylic acids and derivatives	Amino acids, peptides, and analogues	20190304JAP_CCSdatabase_final.csv
N-alpha-Acetyl-L-asparagine	C6H10N2O4	99715	CC(=O)N[C@@H](CC(=O)N)C(=O)O	[M-H]	137.4	Organic acids and derivatives	Carboxylic acids and derivatives	Amino acids, peptides, and analogues	20190304JAP_CCSdatabase_final.csv
N-Acetyl-L-aspartic Acid	C6H9NO5	65065	CC(=O)N[C@@H](CC(=O)O)C(=O)O	[M-H]	131.3	Organic acids and derivatives	Carboxylic acids and derivatives	Amino acids, peptides, and analogues	20190304JAP_CCSdatabase_final.csv
N-Acetylphenylalanine	C11H13NO3	74839	CC(=O)N[C@@H](CC1=CC=CC=C1)C(=O)O	[M-H]	147.1	Organic acids and derivatives	Carboxylic acids and derivatives	Amino acids, peptides, and analogues	20190304JAP_CCSdatabase_final.csv
N-Acetylglutamate	C7H11NO5	70914	CC(=O)N[C@@H](CCC(=O)O)C(=O)O	[M-H]	137	Organic acids and derivatives	Carboxylic acids and derivatives	Amino acids, peptides, and analogues	20190304JAP_CCSdatabase_final.csv
N-alpha-Acetyllysine	C8H16N2O3	92907	CC(=O)N[C@@H](CCCCN)C(=O)O	[M-H]	145.1	Organic acids and derivatives	Carboxylic acids and derivatives	Amino acids, peptides, and analogues	20190304JAP_CCSdatabase_final.csv
N-Acetylmethionine	C7H13NO3S	448580	CC(=O)N[C@@H](CCSC)C(=O)O	[M-H]	142.7	Organic acids and derivatives	Carboxylic acids and derivatives	Amino acids, peptides, and analogues	20190304JAP_CCSdatabase_final.csv
N-Acetyl-D-Tryptophan	C13H14N2O3	439917	CC(=O)N[C@H](CC1=CNC2=CC=CC=C21)C(=O)O	[M-H]	161.4	Organic acids and derivatives	Carboxylic acids and derivatives	Amino acids, peptides, and analogues	20190304JAP_CCSdatabase_final.csv
N-Acetylproline	C7H11NO3	17788000	CC(=O)N1CCCC1C(=O)[O-]	[M-H]	134.1	Organic acids and derivatives	Carboxylic acids and derivatives	Amino acids, peptides, and analogues	20190304JAP_CCSdatabase_final.csv
N-Acetyl-DL-tryptophan	C13H14N2O3	2002	CC(=O)NC(CC1=CNC2=CC=CC=C21)C(=O)O	[M-H]	158.6	Organic acids and derivatives	Carboxylic acids and derivatives	Amino acids, peptides, and analogues	20190304JAP_CCSdatabase_final.csv
N-Acetylserine	C5H9NO4	352294	CC(=O)NC(CO)C(=O)O	[M-H]	127.5	Organic acids and derivatives	Carboxylic acids and derivatives	Amino acids, peptides, and analogues	20190304JAP_CCSdatabase_final.csv
N1-Acetylspermine	C12H28N4O	25201943	CC(=O)NCCC[NH2+]CCCC[NH2+]CCC[NH3+]	[M+H]	158.1	Organic acids and derivatives	Carboxylic acids and derivatives	Carboxylic acid derivatives	20190304JAP_CCSdatabase_final.csv
4-Acetamidobutanoate	C6H11NO3	18189	CC(=O)NCCCC(=O)O	[M-H]	131.2	Organic acids and derivatives	Carboxylic acids and derivatives	Amino acids, peptides, and analogues	20190304JAP_CCSdatabase_final.csv
N-Acetylputrescine	C6H14N2O	122356	CC(=O)NCCCCN	[M+H]	128.4	Organic acids and derivatives	Carboximidic acids and derivatives	Carboximidic acids	20190304JAP_CCSdatabase_final.csv
O-Acetylserine	C5H9NO4	99478	CC(=O)OC[C@@H](C(=O)O)N	[M+H]	130.5	Organic acids and derivatives	Carboxylic acids and derivatives	Amino acids, peptides, and analogues	20190304JAP_CCSdatabase_final.csv
L-(+)-Lactic Acid	C3H6O3	612	CC(C(=O)O)O	[M-H]	151.9	Organic acids and derivatives	Carboxylic acids and derivatives	Amino acids, peptides, and analogues	20190304JAP_CCSdatabase_final.csv
2-Amino-2-methylpropanoate	C4H9NO2	6119	CC(C)(C(=O)O)N	[M-H]	129	Organic acids and derivatives	Carboxylic acids and derivatives	Amino acids, peptides, and analogues	20190304JAP_CCSdatabase_final.csv
D-tert-Leucine	C6H13NO2	6950339	CC(C)(C)[C@H](C(=O)[O-])[NH3+]	[M-H]	131.4	Organic acids and derivatives	Carboxylic acids and derivatives	Amino acids, peptides, and analogues	20190304JAP_CCSdatabase_final.csv
Val-Tyr-Val	C19H29N3O5	7015709	CC(C)[C@@H](C(=O)N[C@@H](CC1=CC=C(C=C1)O)C(=O)N[C@@H](C(C)C)C(=O)[O-])[NH3+]	[M-H]	185.2	Organic acids and derivatives	Carboxylic acids and derivatives	Amino acids, peptides, and analogues	20190304JAP_CCSdatabase_final.csv
L-Valine	C5H11NO2	6287	CC(C)[C@@H](C(=O)O)N	[M-H]	124.9	Organic acids and derivatives	Carboxylic acids and derivatives	Amino acids, peptides, and analogues	20190304JAP_CCSdatabase_final.csv
Isobutyrylamino Acetic Acid	C6H11NO3	10855600	CC(C)C(=O)NCC(=O)O	[M-H]	140.7	Organic acids and derivatives	Carboxylic acids and derivatives	Amino acids, peptides, and analogues	20190304JAP_CCSdatabase_final.csv
Substance P	C63H98N18O13S	36511	CC(C)C[C@@H](C(=O)N[C@@H](CCSC)C(=O)N)NC(=O)CNC(=O)[C@H](CC1=CC=CC=C1)NC(=O)[C@H](CC2=CC=CC=C2)NC(=O)[C@H](CCC(=O)N)NC(=O)[C@H](CCC(=O)N)NC(=O)[C@@H]3CCCN3C(=O)[C@H](CCCCN)NC(=O)[C@@H]4CCCN4C(=O)[C@H](CCCN=C(N)N)N	[M+H]	362	Organic acids and derivatives	Carboxylic acids and derivatives	Amino acids, peptides, and analogues	20190304JAP_CCSdatabase_final.csv
L-Leucine	C6H13NO2	6106	CC(C)C[C@@H](C(=O)O)N	[M-H]	131.8	Organic acids and derivatives	Carboxylic acids and derivatives	Amino acids, peptides, and analogues	20190304JAP_CCSdatabase_final.csv
Leucine Enkephalin	C28H37N5O7	461776	CC(C)C[C@@H](C(=O)O)NC(=O)[C@H](CC1=CC=CC=C1)NC(=O)CNC(=O)CNC(=O)[C@H](CC2=CC=C(C=C2)O)N	[M-H]	222.6	Organic acids and derivatives	Carboxylic acids and derivatives	Amino acids, peptides, and analogues	20190304JAP_CCSdatabase_final.csv
N-Acetylleucine	C8H15NO3	70912	CC(C)C[C@@H](C(=O)O)NC(=O)C	[M-H]	140.7	Organic acids and derivatives	Carboxylic acids and derivatives	Amino acids, peptides, and analogues	20190304JAP_CCSdatabase_final.csv
D-Leucine	C6H13NO2	439524	CC(C)C[C@H](C(=O)O)N	[M-H]	133.4	Organic acids and derivatives	Carboxylic acids and derivatives	Amino acids, peptides, and analogues	20190304JAP_CCSdatabase_final.csv
Imazapyr	C13H15N3O3	54738	CC(C)C1(C(=O)NC(=N1)C2=C(C=CC=N2)C(=O)O)C	[M-H]	164.4	Organic acids and derivatives	Carboxylic acids and derivatives	Amino acids, peptides, and analogues	20190304JAP_CCSdatabase_final.csv
DL-beta-Hydroxybutyric Acid Sodium Salt	C4H8O3	9379	CC(CC(=O)[O-])O.[Na+]	[M-H]	137.1	Organic acids and derivatives	Hydroxy acids and derivatives	Beta hydroxy acids and derivatives	20190304JAP_CCSdatabase_final.csv
3-Amino-2-methylpropanoicÃÂacid	C4H9NO2	64956	CC(CN)C(=O)O	[M+H]	124.2	Organic acids and derivatives	Carboxylic acids and derivatives	Amino acids, peptides, and analogues	20190304JAP_CCSdatabase_final.csv
Ophthalmate	C11H19N3O6	7018721	CC[C@@H](C(=O)NCC(=O)O)NC(=O)CC[C@@H](C(=O)O)N	[M-H]	160.8	Organic acids and derivatives	Carboxylic acids and derivatives	Amino acids, peptides, and analogues	20190304JAP_CCSdatabase_final.csv
L-allo-Isoleucine	C6H13NO2	99288	CC[C@@H](C)[C@@H](C(=O)O)N	[M-H]	133.4	Organic acids and derivatives	Carboxylic acids and derivatives	Amino acids, peptides, and analogues	20190304JAP_CCSdatabase_final.csv
D-Isoleucine	C6H13NO2	76551	CC[C@@H](C)[C@H](C(=O)O)N	[M-H]	132	Organic acids and derivatives	Carboxylic acids and derivatives	Amino acids, peptides, and analogues	20190304JAP_CCSdatabase_final.csv
Angiotensin I	C62H89N17O14	3081372	CC[C@H](C)[C@@H](C(=O)N[C@@H](CC1=CN=CN1)C(=O)N2CCC[C@H]2C(=O)N[C@@H](CC3=CC=CC=C3)C(=O)N[C@@H](CC4=CN=CN4)C(=O)N[C@@H](CC(C)C)C(=O)O)NC(=O)[C@H](CC5=CC=C(C=C5)O)NC(=O)[C@H](C(C)C)NC(=O)[C@H](CCCN=C(N)N)NC(=O)[C@H](CC(=O)O)N	[M+H]	356.5	Organic acids and derivatives	Carboxylic acids and derivatives	Amino acids, peptides, and analogues	20190304JAP_CCSdatabase_final.csv
Angiotensin II	C50H71N13O12	172198	CC[C@H](C)[C@@H](C(=O)N[C@@H](CC1=CN=CN1)C(=O)N2CCC[C@H]2C(=O)N[C@@H](CC3=CC=CC=C3)C(=O)O)NC(=O)[C@H](CC4=CC=C(C=C4)O)NC(=O)[C@H](C(C)C)NC(=O)[C@H](CCCN=C(N)N)NC(=O)[C@H](CC(=O)O)N	[M+H]	314	Organic acids and derivatives	Carboxylic acids and derivatives	Amino acids, peptides, and analogues	20190304JAP_CCSdatabase_final.csv
L-Isoleucine	C6H13NO2	6306	CC[C@H](C)[C@@H](C(=O)O)N	[M-H]	130.6	Organic acids and derivatives	Carboxylic acids and derivatives	Amino acids, peptides, and analogues	20190304JAP_CCSdatabase_final.csv
Oxytocin	C43H66N12O12S2	439302	CC[C@H](C)[C@H]1C(=O)N[C@H](C(=O)N[C@H](C(=O)N[C@@H](CSSC[C@@H](C(=O)N[C@H](C(=O)N1)CC2=CC=C(C=C2)O)N)C(=O)N3CCC[C@H]3C(=O)N[C@@H](CC(C)C)C(=O)NCC(=O)N)CC(=O)N)CCC(=O)N	[M-H]	297.9	Organic acids and derivatives	Carboxylic acids and derivatives	Amino acids, peptides, and analogues	20190304JAP_CCSdatabase_final.csv
2-Hydroxybutyrate	C4H8O3	3014346	CCC(C(=O)[O-])O.[Na+]	[M-H]	120.5	Organic acids and derivatives	Hydroxy acids and derivatives	Alpha hydroxy acids and derivatives	20190304JAP_CCSdatabase_final.csv
3-Methyl-2-oxovalerate	C6H10O3	47	CCC(C)C(=O)C(=O)O	[M-H]	127.3	Organic acids and derivatives	Keto acids and derivatives	Short-chain keto acids and derivatives	20190304JAP_CCSdatabase_final.csv
MIFAGIK (Tryptic Peptide)	C37H62N8O8S	14818979	CCC(C)C(C(=O)NC(CCCCN)C(=O)O)NC(=O)CNC(=O)C(C)NC(=O)C(CC1=CC=CC=C1)NC(=O)C(C(C)CC)NC(=O)C(CCSC)N	[M+H]	274.9	Organic acids and derivatives	Carboxylic acids and derivatives	Amino acids, peptides, and analogues	20190304JAP_CCSdatabase_final.csv
Norvaline	C5H11NO2	65098	CCC[C@@H](C(=O)O)N	[M-H]	142.5	Organic acids and derivatives	Carboxylic acids and derivatives	Amino acids, peptides, and analogues	20190304JAP_CCSdatabase_final.csv
2-Oxovaleric Acid	C5H8O3	74563	CCCC(=O)C(=O)O	[M-H]	173.8	Organic acids and derivatives	Keto acids and derivatives	Short-chain keto acids and derivatives	20190304JAP_CCSdatabase_final.csv
L-Norleucine	C6H13NO2	21236	CCCC[C@@H](C(=O)O)N	[M-H]	132.2	Organic acids and derivatives	Carboxylic acids and derivatives	Amino acids, peptides, and analogues	20190304JAP_CCSdatabase_final.csv
Leukotriene C4	C30H47N3O9S	5280493	CCCCC/C=C\C/C=C\C=C\C=C\[C@H]([C@H](CCCC(=O)O)O)SC[C@@H](C(=O)NCC(=O)O)NC(=O)CC[C@@H](C(=O)O)N	[M-H]	245.2	Organic acids and derivatives	Carboxylic acids and derivatives	Amino acids, peptides, and analogues	20190304JAP_CCSdatabase_final.csv
Daptomycin	C72H101N17O26	16129629	CCCCCCCCCC(=O)N[C@@H](CC1=CNC2=CC=CC=C21)C(=O)N[C@@H](CC(=O)N)C(=O)N[C@@H](CC(=O)O)C(=O)NC3C(OC(=O)[C@@H](NC(=O)[C@@H](NC(=O)[C@H](NC(=O)CNC(=O)[C@@H](NC(=O)[C@H](NC(=O)[C@@H](NC(=O)[C@@H](NC(=O)CNC3=O)CCCN)CC(=O)O)C)CC(=O)O)CO)C(C)CC(=O)O)CC(=O)C4=CC=CC=C4N)C	[M+H]	379.3	Organic acids and derivatives	Peptidomimetics	Depsipeptides	20190304JAP_CCSdatabase_final.csv
(S)-Hexyl-glutathione	C16H29N3O6S	97536	CCCCCCSC[C@@H](C(=O)NCC(=O)O)NC(=O)CC[C@@H](C(=O)O)N	[M-H]	188.9	Organic acids and derivatives	Carboxylic acids and derivatives	Amino acids, peptides, and analogues	20190304JAP_CCSdatabase_final.csv
3-Nitro-L-tyrosine	C9H10N2O5	91644	CCCOCCN(C1=C(C=CC=C1CC)CC)C(=O)CCl	[M-H]	149	Organic acids and derivatives	Carboxylic acids and derivatives	Amino acids, peptides, and analogues	20190304JAP_CCSdatabase_final.csv
N,N-Dimethylglycine Ethyl Ester	C6H13NO2	118412	CCOC(=O)CN(C)C	[M+H]	127.9	Organic acids and derivatives	Carboxylic acids and derivatives	Amino acids, peptides, and analogues	20190304JAP_CCSdatabase_final.csv
N,N-Dimethylarginine Dihydrochloride	C8H18N4O2	16219246	CN(C)C(=NCCC[C@@H](C(=O)O)N)N.Cl.Cl	[M+H]	144.4	Organic acids and derivatives	Carboxylic acids and derivatives	Amino acids, peptides, and analogues	20190304JAP_CCSdatabase_final.csv
N,N-Dimethylglycine	C4H9NO2	673	CN(C)CC(=O)O	[M+H]	123.1	Organic acids and derivatives	Carboxylic acids and derivatives	Amino acids, peptides, and analogues	20190304JAP_CCSdatabase_final.csv
Sodium Creatine Phosphate Dibasic Tetrahydrate	C4H10N3O5P	24802058	CN(CC(=O)O)/C(=N/P(=O)([O-])[O-])/N.O.O.O.O.[Na+].[Na+]	[M+H]	144.8	Organic acids and derivatives	Carboxylic acids and derivatives	Amino acids, peptides, and analogues	20190304JAP_CCSdatabase_final.csv
Creatine	C4H9N3O2	586	CN(CC(=O)O)C(=N)N	[M+H]	126	Organic acids and derivatives	Carboxylic acids and derivatives	Amino acids, peptides, and analogues	20190304JAP_CCSdatabase_final.csv
N-Methyl-L-glutamate	C6H11NO4	439377	CN[C@@H](CCC(=O)O)C(=O)O	[M-H]	124.5	Organic acids and derivatives	Carboxylic acids and derivatives	Amino acids, peptides, and analogues	20190304JAP_CCSdatabase_final.csv
N-Methylaspartate	C5H9NO4	22880	CN[C@H](CC(=O)O)C(=O)O	[M-H]	124.5	Organic acids and derivatives	Carboxylic acids and derivatives	Amino acids, peptides, and analogues	20190304JAP_CCSdatabase_final.csv
3-Methyl-L-histidine	C7H11N3O2	64969	CN1C=NC=C1C[C@@H](C(=O)O)N	[M-H]	141.1	Organic acids and derivatives	Carboxylic acids and derivatives	Amino acids, peptides, and analogues	20190304JAP_CCSdatabase_final.csv
Anserine	C10H16N4O3	6362	CN1C=NC=C1C[C@@H](C(=O)O)NC(=O)CCN	[M-H]	154.9	Organic acids and derivatives	Peptidomimetics	Hybrid peptides	20190304JAP_CCSdatabase_final.csv
Creatinine	C4H7N3O	588	CN1CC(=O)N=C1N	[M-H]	119.1	Organic acids and derivatives	Carboxylic acids and derivatives	Amino acids, peptides, and analogues	20190304JAP_CCSdatabase_final.csv
cis-Aconitic acid	C6H6O6	6429511	COC(=O)CC=C(C(=O)OC)C(=O)OC	[M-H]	131.9	Organic acids and derivatives	Carboxylic acids and derivatives	Tricarboxylic acids and derivatives	20190304JAP_CCSdatabase_final.csv
Methyl-4-aminobutyrate	C5H11NO2	25623	COC(=O)CCC[NH3+].[Cl-]	[M+H]	124.7	Organic acids and derivatives	Carboxylic acids and derivatives	Amino acids, peptides, and analogues	20190304JAP_CCSdatabase_final.csv
3-Methoxytyrosine	C10H13NO4	1670	COC1=C(C=CC(=C1)CC(C(=O)O)N)O	[M-H]	148.2	Organic acids and derivatives	Carboxylic acids and derivatives	Amino acids, peptides, and analogues	20190304JAP_CCSdatabase_final.csv
4,6-Dioxoheptanoic Acid	C7H10O4	160921	COC1=CC=C(C=C1)C2=CC(=O)C3=C(C(=C(C(=C3O2)OC)O)OC)O	[M-H]	131	Organic acids and derivatives	Keto acids and derivatives	Medium-chain keto acids and derivatives	20190304JAP_CCSdatabase_final.csv
Glufosinate-ammonium	C5H15N2O4P	53597	CP(=O)(CCC(C(=O)[O-])N)O.[NH4+]	[M-H]	135.4	Organic acids and derivatives	Carboxylic acids and derivatives	Amino acids, peptides, and analogues	20190304JAP_CCSdatabase_final.csv
Methionine Sulfoximine	C5H12N2O3S	89034	CS(=N)(=O)CC[C@@H](C(=O)O)N	[M-H]	136.4	Organic acids and derivatives	Carboxylic acids and derivatives	Amino acids, peptides, and analogues	20190304JAP_CCSdatabase_final.csv
L-Methionine	C5H11NO2S	6137	CSCC[C@@H](C(=O)O)N	[M-H]	140.5	Organic acids and derivatives	Carboxylic acids and derivatives	Amino acids, peptides, and analogues	20190304JAP_CCSdatabase_final.csv
N-Formyl-L-methionine	C6H11NO3S	439750	CSCC[C@@H](C(=O)O)NC=O	[M-H]	136.3	Organic acids and derivatives	Carboxylic acids and derivatives	Amino acids, peptides, and analogues	20190304JAP_CCSdatabase_final.csv
L-Cystine	C6H12N2O4S2	[Compound(67678), Compound(6992103)]	C([C@@H](C(=O)O)N)SSC[C@@H](C(=O)O)N	[M-H]	144.39	Organic acids and derivatives	Carboxylic acids and derivatives	Amino acids, peptides, and analogues	UnifiedCCSCompendium_20200812.csv
Trifluoroacetic Acid	CF3COOH	[Compound(71299604)]	C(=O)(C(F)(F)F)[O-].[NH2+]	[M-H]	108.93	Organic acids and derivatives	Carboxylic acids and derivatives	Alpha-halocarboxylic acids and derivatives	UnifiedCCSCompendium_20200812.csv
L-Arginine	C6H14N4O2	[Compound(6322), Compound(28782)]	C(C[C@@H](C(=O)O)N)CN=C(N)N	[M-H]	138.03	Organic acids and derivatives	Carboxylic acids and derivatives	Amino acids, peptides, and analogues	UnifiedCCSCompendium_20200812.csv
L-Glutamic Acid	C5H9NO4	[Compound(33032), Compound(44272391), Compound(88747398)]	C(CC(=O)O)[C@@H](C(=O)O)N	[M-H]	125.65	Organic acids and derivatives	Carboxylic acids and derivatives	Amino acids, peptides, and analogues	UnifiedCCSCompendium_20200812.csv
L-Lysine	C6H14N2O2	[Compound(5962), Compound(71774817), Compound(122198194)]	C(CCN)C[C@@H](C(=O)O)N	[M+H]	131.6	Organic acids and derivatives	Carboxylic acids and derivatives	Amino acids, peptides, and analogues	UnifiedCCSCompendium_20200812.csv
DL-Homocysteine	C4H9NO2S	[Compound(778), Compound(49791978)]	C(CS)C(C(=O)O)N	[M+H]	130.78	Organic acids and derivatives	Carboxylic acids and derivatives	Amino acids, peptides, and analogues	UnifiedCCSCompendium_20200812.csv
Betaine	C5H11NO2	[Compound(247), Compound(153685059)]	C[N+](C)(C)CC(=O)[O-]	[M+H]	121.3	Organic acids and derivatives	Carboxylic acids and derivatives	Amino acids, peptides, and analogues	UnifiedCCSCompendium_20200812.csv
L-Proline	C5H9NO2	[Compound(145742), Compound(6971047)]	C1C[C@H](NC1)C(=O)O	[M+H]	126.22	Organic acids and derivatives	Carboxylic acids and derivatives	Amino acids, peptides, and analogues	UnifiedCCSCompendium_20200812.csv
L-Leucine	C6H13NO2	[Compound(6106), Compound(7045798)]	CC(C)C[C@@H](C(=O)O)N	[M-H]	132.51	Organic acids and derivatives	Carboxylic acids and derivatives	Amino acids, peptides, and analogues	UnifiedCCSCompendium_20200812.csv
L-Methionine	C5H11NO2S	[Compound(6137), Compound(6992087)]	CSCC[C@@H](C(=O)O)N	[M+H]	134.08	Organic acids and derivatives	Carboxylic acids and derivatives	Amino acids, peptides, and analogues	UnifiedCCSCompendium_20200812.csv
5'-Deoxyadenosine	C10H13N5O3	439182	C[C@@H]1[C@H]([C@H]([C@@H](O1)N2C=NC3=C(N=CN=C32)N)O)O	[M-H]	154.9	Organoheterocyclic compounds	5'-deoxyribonucleosides		20190304JAP_CCSdatabase_final.csv
Deoxyadenosine	C10H13N5O3	13730	C1[C@@H]([C@H](O[C@H]1N2C=NC3=C(N=CN=C32)N)CO)O	[M-H]	155.4	Organoheterocyclic compounds	Purine nucleosides	Purine 2'-deoxyribonucleosides	20190304JAP_CCSdatabase_final.csv
Deoxyadenosine Triphosphate	C10H16N5O12P3	18601695	C1[C@@H]([C@H](O[C@H]1N2C=NC3=C(N=CN=C32)N)COP(=O)([O-])OP(=O)(O)OP(=O)(O)[O-])O.[Na+].[Na+]	[M-H]	186.4	Organoheterocyclic compounds	Purine nucleotides	Purine deoxyribonucleotides	20190304JAP_CCSdatabase_final.csv
2-Deoxyadenosine-5-monophosphate	C10H14N5O6P	12599	C1[C@@H]([C@H](O[C@H]1N2C=NC3=C(N=CN=C32)N)COP(=O)(O)O)O	[M-H]	168.8	Organoheterocyclic compounds	Purine nucleotides	Purine deoxyribonucleotides	20190304JAP_CCSdatabase_final.csv
2'-Deoxyguanosine-5'-diphosphate Trisodium Salt	C10H15N5O10P2	25245673	C1[C@@H]([C@H](O[C@H]1N2C=NC3=C2NC(=NC3=O)N)COP(=O)([O-])OP(=O)([O-])[O-])O	[M-H]	180.8	Organoheterocyclic compounds	Purine nucleotides	Purine deoxyribonucleotides	20190304JAP_CCSdatabase_final.csv
2'-Deoxyguanosine-5'-triphosphate Trisodium Salt	C10H16N5O13P3	65103	C1[C@@H]([C@H](O[C@H]1N2C=NC3=C2NC(=NC3=O)N)COP(=O)(O)OP(=O)(O)OP(=O)(O)O)O	[M-H]	191.9	Organoheterocyclic compounds	Purine nucleotides	Purine deoxyribonucleotides	20190304JAP_CCSdatabase_final.csv
Cyclic-GMP	C10H12N5O7P	16219426	C1[C@@H]2[C@H]([C@H]([C@@H](O2)N3C=NC4=C3NC(=NC4=O)N)O)OP(=O)(O1)[O-].[Na+]	[M-H]	167.8	Organoheterocyclic compounds	Purine nucleotides	Cyclic purine nucleotides	20190304JAP_CCSdatabase_final.csv
Adenosine	C10H13N5O4	60961	C1=NC(=C2C(=N1)N(C=N2)[C@H]3[C@@H]([C@@H]([C@H](O3)CO)O)O)N	[M-H]	157.7	Organoheterocyclic compounds	Purine nucleosides		20190304JAP_CCSdatabase_final.csv
Adenosine-5'-monophosphate	C10H14N5O7P	20712	C1=NC(=C2C(=N1)N(C=N2)[C@H]3[C@@H]([C@@H]([C@H](O3)COP(=O)([O-])[O-])O)O)N.[Na+].[Na+]	[M-H]	174.1	Organoheterocyclic compounds	Purine nucleotides	Purine ribonucleotides	20190304JAP_CCSdatabase_final.csv
(S)-Adenosylhomocysteine	C14H20N6O5S	439155	C1=NC(=C2C(=N1)N(C=N2)[C@H]3[C@@H]([C@@H]([C@H](O3)CSCC[C@@H](C(=O)O)N)O)O)N	[M-H]	186.4	Organoheterocyclic compounds	5'-deoxyribonucleosides	5'-deoxy-5'-thionucleosides	20190304JAP_CCSdatabase_final.csv
Adenosine-2',3'-Cyclic Phosphate	C10H12N5O6P	2024	C1=NC(=C2C(=N1)N(C=N2)C3C4C(C(O3)CO)OP(=O)(O4)O)N	[M-H]	169.4	Organoheterocyclic compounds	Purine nucleotides	Cyclic purine nucleotides	20190304JAP_CCSdatabase_final.csv
Inosine	C10H12N4O5	6021	C1=NC(=O)C2=C(N1)N(C=N2)[C@H]3[C@@H]([C@@H]([C@H](O3)CO)O)O	[M-H]	159.6	Organoheterocyclic compounds	Purine nucleosides		20190304JAP_CCSdatabase_final.csv
Inosine-5'-diphosphate	C10H14N4O11P2	7156952	C1=NC(=O)C2=C(N1)N(C=N2)[C@H]3[C@@H]([C@@H]([C@H](O3)COP(=O)([O-])OP(=O)([O-])[O-])O)O	[M+H]	186.5	Organoheterocyclic compounds	Purine nucleotides	Purine ribonucleotides	20190304JAP_CCSdatabase_final.csv
Inosine-5'-monophosphate	C10H13N4O8P	8582	C1=NC(=O)C2=C(N1)N(C=N2)[C@H]3[C@@H]([C@@H]([C@H](O3)COP(=O)(O)O)O)O	[M-H]	171.4	Organoheterocyclic compounds	Purine nucleotides	Purine ribonucleotides	20190304JAP_CCSdatabase_final.csv
Guanosine	C10H13N5O5	6802	C1=NC2=C(N1[C@H]3[C@@H]([C@@H]([C@H](O3)CO)O)O)NC(=NC2=O)N	[M-H]	163	Organoheterocyclic compounds	Purine nucleosides		20190304JAP_CCSdatabase_final.csv
Xanthosine	C10H12N4O6	64959	C1=NC2=C(N1[C@H]3[C@@H]([C@@H]([C@H](O3)CO)O)O)NC(=O)NC2=O	[M-H]	159.5	Organoheterocyclic compounds	Purine nucleosides		20190304JAP_CCSdatabase_final.csv
Guanosine-5'-monophosphate Disodium Salt Hydrate	C10H14N5O8P	21712	C1=NC2=C(N1[C@H]3[C@@H]([C@@H]([C@H](O3)COP(=O)([O-])[O-])O)O)NC(=NC2=O)N.[Na+].[Na+]	[M-H]	171.7	Organoheterocyclic compounds	Purine nucleotides	Purine ribonucleotides	20190304JAP_CCSdatabase_final.csv
Xanthosine-Monophosphate	C10H13N4O9P	10287649	C1=NC2=C(N1[C@H]3[C@@H]([C@@H]([C@H](O3)COP(=O)([O-])[O-])O)O)NC(=O)NC2=O.[Na+].[Na+]	[M-H]	166.2	Organoheterocyclic compounds	Purine nucleotides	Purine ribonucleotides	20190304JAP_CCSdatabase_final.csv
Guanosine Monophosphate	C10H14N5O8P	6804	C1=NC2=C(N1[C@H]3[C@@H]([C@@H]([C@H](O3)COP(=O)(O)O)O)O)NC(=NC2=O)N	[M-H]	169.4	Organoheterocyclic compounds	Purine nucleotides	Purine ribonucleotides	20190304JAP_CCSdatabase_final.csv
Guanosine Triphosphate	C10H16N5O14P3	44134758	C1=NC2=C(N1C3C(C(C(O3)COP(=O)(O)OP(=O)([O-])OP(=O)([O-])[O-])O)O)NC(=NC2=O)N.[Na+].[Na+].[Na+]	[M-H]	193.4	Organoheterocyclic compounds	Purine nucleotides	Purine ribonucleotides	20190304JAP_CCSdatabase_final.csv
Guanosine Diphosphate	C10H15N5O11P2	730	C1=NC2=C(N1C3C(C(C(O3)COP(=O)(O)OP(=O)(O)O)O)O)NC(=NC2=O)N	[M-H]	182.5	Organoheterocyclic compounds	Purine nucleotides	Purine ribonucleotides	20190304JAP_CCSdatabase_final.csv
1-Methylguanosine	C11H15N5O5	96373	CN1C(=O)C2=C(N=C1N)N(C=N2)[C@H]3[C@@H]([C@@H]([C@H](O3)CO)O)O	[M-H]	166.4	Organoheterocyclic compounds	Purine nucleosides		20190304JAP_CCSdatabase_final.csv
1-Methyladenosine	C11H15N5O4	27476	CN1C=NC2=C(C1=N)N=CN2[C@H]3[C@@H]([C@@H]([C@H](O3)CO)O)O	[M-H]	162.9	Organoheterocyclic compounds	Purine nucleotides		20190304JAP_CCSdatabase_final.csv
5'-Methylthioadenosine	C11H15N5O3S	439176	CSC[C@@H]1[C@H]([C@H]([C@@H](O1)N2C=NC3=C(N=CN=C32)N)O)O	[M-H]	168.3	Organoheterocyclic compounds	5'-deoxyribonucleosides	5'-deoxy-5'-thionucleosides	20190304JAP_CCSdatabase_final.csv
Myricetin	C15H10O8	5281672	C1=C(C=C(C(=C1O)O)O)C2=C(C(=O)C3=C(C=C(C=C3O2)O)O)O	[M+H]	192.7	Benzenoids	Flavonoids	Flavones	20190304JAP_CCSdatabase_final.csv
Kaempferol	C15H10O6	5280863	C1=CC(=CC=C1C2=C(C(=O)C3=C(C=C(C=C3O2)O)O)O)O	[M-H]	165.4	Benzenoids	Flavonoids	Flavones	20190304JAP_CCSdatabase_final.csv
Isorhamnetin	C16H12O7	5281654	COC1=C(C=CC(=C1)C2=C(C(=O)C3=C(C=C(C=C3O2)O)O)O)O	[M-H]	174	Benzenoids	Flavonoids	Flavones	20190304JAP_CCSdatabase_final.csv
5-7-dihydroxy-3-4-5-trimethoxyflavone	C18H16O7	5379265	COC1=CC(=CC(=C1OC)OC)C2=CC(=O)C3=C(C=C(C=C3O2)O)O	[M-H]	191	Benzenoids	Flavonoids	O-methylated flavonoids	20190304JAP_CCSdatabase_final.csv
Tangeritin	C20H20O7	68077	COC1=CC=C(C=C1)C2=CC(=O)C3=C(O2)C(=C(C(=C3OC)OC)OC)OC	[M+H]	186.7	Benzenoids	Flavonoids	O-methylated flavonoids	20190304JAP_CCSdatabase_final.csv
D-Aspartic Acid	C4H7NO4	424	C(C(C(=O)O)N)C(=O)O	[M-H]-	121.8514866	Organic acids and derivatives	Amino Acids		metabolitedata.csv
L-Ornithine	C5H12N2O2	6262	C(C[C@@H](C(=O)O)N)CN	[M+H]+	129.7939515	Organic acids and derivatives	Amino Acids		metabolitedata.csv
Homocysteine	C4H9NO2S	91552	C(CS)[C@@H](C(=O)O)N	[M+H]+	130.5312267	Organic acids and derivatives	Amino Acids		metabolitedata.csv
Phosphocreatine	C4H10N3O5P	9548602	CN(CC(=O)O)/C(=N/P(=O)(O)O)/N	[M+H]+	153.7666667	Organic acids and derivatives	Amino Acids		metabolitedata.csv
L-Anserine	C10H16N4O3	112072	CN1C=NC=C1C[C@@H](C(=O)O)NC(=O)CCN	[M+H]+	155.97	Organic acids and derivatives	Amino Acids		metabolitedata.csv
3-Methoxy-L-Tyrosine	C10H13NO4	9307	COC1=C(C=CC(=C1)C[C@@H](C(=O)O)N)O	[M+H]+	158.7333333	Organic acids and derivatives	Amino Acids		metabolitedata.csv
Adenosine 5' Monophosphate	C10H14N5O7P	6083	C1=NC(=C2C(=N1)N(C=N2)[C@H]3[C@@H]([C@@H]([C@H](O3)COP(=O)(O)O)O)O)N	[M+H]	173.3267021	Organic acids and derivatives	Nucleotides		metabolitedata.csv
2-Keto-3-deoxy-D-gluconic Acid	C6H10O6	194024	C([C@H]([C@@H](CO)O)O)C(=O)C(=O)O	[M-H]-	134.3181404	Organic acids and derivatives	Steroids		metabolitedata.csv
Glufosinate	C5H15N2O4P	4794	CP(=O)(CCC(C(=O)O)N)O	[M+H]	140.1493171	Organic acids and derivatives			metabolitedata.csv
Delphinidin	C15H11O7	128853	C1=C(C=C(C(=C1O)O)O)C2=[O+]C3=CC(=CC(=C3C=C2O)O)O	[M*]	170.3	Benzenoids	Flavonoids	Hydroxyflavonoids	20190304JAP_CCSdatabase_final.csv
Cyanidin	C15H11O6	128861	C1=CC(=C(C=C1C2=[O+]C3=CC(=CC(=C3C=C2O)O)O)O)O	[M*]	167.1	Benzenoids	Flavonoids	Hydroxyflavonoids	20190304JAP_CCSdatabase_final.csv
Malvidin	C17H15O7	159287	COC1=CC(=CC(=C1O)OC)C2=[O+]C3=CC(=CC(=C3C=C2O)O)O	[M*]	177.4	Benzenoids	Flavonoids	O-methylated flavonoids	20190304JAP_CCSdatabase_final.csv
Acacetin	C16H12O5	5280442	COC1=CC=C(C=C1)C2=CC(=O)C3=C(C=C(C=C3O2)O)O	[M-H]	172.3	Benzenoids	Flavonoids	O-methylated flavonoids	20190304JAP_CCSdatabase_final.csv
Spermidine	C7H19N3	1102	C(CCNCCCN)CN	[M+H]	131.3	Organic acids and derivatives	Organonitrogen compounds	Amines	20190304JAP_CCSdatabase_final.csv
Spermine	C10H26N4	1103	C(CCNCCCN)CNCCCN	[M+H]	148.6	Organic acids and derivatives	Organonitrogen compounds	Amines	20190304JAP_CCSdatabase_final.csv
Choline	C5H14NO	305	C[N+](C)(C)CCO	[M*]	118.7	Organic acids and derivatives	Organonitrogen compounds	Quaternary ammonium salts	20190304JAP_CCSdatabase_final.csv
Phosphorylcholine	C5H14NO4P	20968	C[N+](C)(C)CCOP(=O)([O-])[O-].[Cl-].[Ca+2]	[M+H]	136.7	Organic acids and derivatives	Organonitrogen compounds	Quaternary ammonium salts	20190304JAP_CCSdatabase_final.csv
Phosphocholine	C5H15NO4P	1014	C[N+](C)(C)CCOP(=O)(O)O	[M+H]	137.7	Organic acids and derivatives	Organonitrogen compounds	Quaternary ammonium salts	20190304JAP_CCSdatabase_final.csv
Histidinol	C6H11N3O	197743	C1=C(NC=N1)C[C@@H](CO)N.Cl.Cl	[M-H]	127.9	Organic acids and derivatives	Organonitrogen compounds	Amines	20190304JAP_CCSdatabase_final.csv
Acetylcholine	C7H16NO2	187	CC(=O)OCC[N+](C)(C)C	[M*]	129.2	Organic acids and derivatives	Organonitrogen compounds	Quaternary ammonium salts	20190304JAP_CCSdatabase_final.csv
3-Methylhistamine	C6H11N3	69520	CN1C=NC=C1CCN	[M+H]	123.8	Organic acids and derivatives	Organonitrogen compounds	Amines	20190304JAP_CCSdatabase_final.csv
Triethylphosphate	C6H15O4P	6535	CCOP(=O)(OCC)OCC	[M+H]+	132.63	Organic acids and derivatives	Organophosphorus		UACCSCEC_ac1c00142_si_002_TS-5.csv
Dibutyl sebacate	C18H34O4	7986	CCCCOC(=O)CCCCCCCCC(=O)OCCCC	[M+H]+	183.89	Organic acids and derivatives			UACCSCEC_ac1c00142_si_002_TS-5.csv
N-(3-Phenylpropionyl) Glycine	C11H13NO3	152323	C1=CC=C(C=C1)CCC(=O)NCC(=O)O	[M+H]+	149.4657949	Organic acids and derivatives	Amino Acids		metabolitedata.csv
tris(2-chloroethyl) phosphate	C6H12Cl3O4P	8295	C(CCl)OP(=O)(OCCCl)OCCCl	[M+H]+	151.31	Organic oxygen compounds	Organophosphorus		UACCSCEC_ac1c00142_si_002_TS-5.csv
Triisobutyl phosphate	C12H27O4P	31355	CC(C)COP(=O)(OCC(C)C)OCC(C)C	[M+H]+	165.44	Organic oxygen compounds	Organophosphorus		UACCSCEC_ac1c00142_si_002_TS-5.csv
Tris(2-chloroisopropyl)phosphate	C9H18Cl3O4P	26176	CC(CCl)OP(=O)(OC(C)CCl)OC(C)CCl	[M+H]+	161.66	Organic oxygen compounds	Organophosphorus		UACCSCEC_ac1c00142_si_002_TS-5.csv
Triamylphosphate	C15H33O4P	75665	CCCCCOP(=O)(OCCCCC)OCCCCC	[M+H]+	183.21	Organic oxygen compounds	Organophosphorus		UACCSCEC_ac1c00142_si_002_TS-5.csv
tris(2-butoxyethyl) phosphate	C18H39O7P	6540	CCCCOCCOP(=O)(OCCOCCCC)OCCOCCCC	[M+H]+	196.44	Organic oxygen compounds	Organophosphorus		UACCSCEC_ac1c00142_si_002_TS-5.csv
Tri-n-butyl phosphate	C12H27O4P	31357	CCCCOP(=O)(OCCCC)OCCCC	[M+H]+	166.73	Organic oxygen compounds	Organophosphorus		UACCSCEC_ac1c00142_si_002_TS-5.csv
Bis(2-chloroethyl) phosphate	C4H9Cl2O4P	76438	C(CCl)OP(=O)(O)OCCCl	[M+H]+	138.08	Organic oxygen compounds			UACCSCEC_ac1c00142_si_002_TS-5.csv
bis(2-butoxyethyl) 2-hydroxyethyl phosphate	C14H31O7P	132967161	CCCCOCCOP(=O)(OCCO)OCCOCCCC	[M+H]+	179.27	Organic oxygen compounds			UACCSCEC_ac1c00142_si_002_TS-5.csv
Di-n-butyl phosphate	C8H19PO4	7881	CCCCOP(=O)(O)OCCCC	[M-H]-	150.89	Organic oxygen compounds			UACCSCEC_ac1c00142_si_002_TS-5.csv
Norspermidine	C6H17N3	5942	C(CN)CNCCCN	[M+H]	127.6	Organic acids and derivatives	Organonitrogen compounds	Amines	20190304JAP_CCSdatabase_final.csv
Diethanolamine	C4H11NO2	8113	C(CO)NCCO	[M+H]	122.2	Organic acids and derivatives	Organonitrogen compounds	Amines	20190304JAP_CCSdatabase_final.csv
Histamine	C5H9N3	774	C1=C(NC=N1)CCN	[M+H]	120.4	Organic acids and derivatives	Organonitrogen compounds	Amines	20190304JAP_CCSdatabase_final.csv
1-Methylhistamine Dihydrochloride	C6H11N3	16219661	CN1C=C(N=C1)CCN.Cl	[M+H]	121.8	Organic acids and derivatives	Organonitrogen compounds	Amines	20190304JAP_CCSdatabase_final.csv
Mono(2-ethyl-5-oxohexyl) adipate	C14H24O5	148780	CCC(CCC(=O)C)COC(=O)CCCCC(=O)O	[M-H]-	165.29	Organic acids and derivatives			UACCSCEC_ac1c00142_si_002_TS-5.csv
Mono(2-ethyl-5-hydroxyhexyl) adipate	C14H26O5	154455	CCC(CCC(C)O)COC(=O)CCCCC(=O)O	[M-H]-	165.79	Organic acids and derivatives			UACCSCEC_ac1c00142_si_002_TS-5.csv
Mono(2-ethylhexyl) adipate	C14H26O4	20342	CCCCC(CC)COC(=O)CCCCC(=O)O	[M-H]-	166.76	Organic acids and derivatives			UACCSCEC_ac1c00142_si_002_TS-5.csv
Di(2-ethylhexyl) adipate	C22H42O4	7641	CCCCC(CC)COC(=O)CCCCC(=O)OCC(CC)CCCC	[M+H]+	209.38	Organic acids and derivatives			UACCSCEC_ac1c00142_si_002_TS-5.csv
tris(2,3-dibromopropyl)phosphate	C9H15Br6O4P	31356	C(C(CBr)Br)OP(=O)(OCC(CBr)Br)OCC(CBr)Br	[M+H]+	197.25	Organic acids and derivatives	Organophosphorus		UACCSCEC_ac1c00142_si_002_TS-5.csv
tris(1,3-dichloro-2-propyl)phosphate	C9H15Cl6O4P	26177	C(C(CCl)OP(=O)(OC(CCl)CCl)OC(CCl)CCl)Cl	[M+H]+	178.56	Organic acids and derivatives	Organophosphorus		UACCSCEC_ac1c00142_si_002_TS-5.csv
Bis(3,5,5-trimethylhexyl)phosphate	C18H39O4P	96179	CC(CCOP(=O)(O)OCCC(C)CC(C)(C)C)CC(C)(C)C	[M+H]+	202.09	Organic acids and derivatives	Organophosphorus		UACCSCEC_ac1c00142_si_002_TS-5.csv
tris(2-ethylhexyl)phosphate	C24H51O4P	6537	CCCCC(CC)COP(=O)(OCC(CC)CCCC)OCC(CC)CCCC	[M+H]+	219.15	Organic acids and derivatives	Organophosphorus		UACCSCEC_ac1c00142_si_002_TS-5.csv
bis(1,3-dichloro-2-propyl) phosphate	C6H11Cl4O4P	188119	C(C(CCl)OP(=O)(O)OC(CCl)CCl)Cl	[M+H]+	178.72	Organic acids and derivatives			UACCSCEC_ac1c00142_si_002_TS-5.csv
bis(1-chloro-2-propyl) 1-hydroxy-2-propyl phosphate	C9H19Cl2O5P	132967160	CC(CO)OP(=O)(OC(C)CCl)OC(C)CCl	[M+H]+	160.61	Organic acids and derivatives			UACCSCEC_ac1c00142_si_002_TS-5.csv
Bis(2-butoxyethyl) hydrogen phosphate	C12H27O6P	84299	CCCCOCCOP(=O)(O)OCCOCCCC	[M+H]+	171.77	Organic acids and derivatives			UACCSCEC_ac1c00142_si_002_TS-5.csv
Bis(2-butoxyethyl) 3?-hydroxy-2-butoxyethyl phosphate	C18H39O8P	134818028	CCCCOCCOP(=O)(OCCOCCCC)OCCOCCC(C)O	[M+H]+	195.45	Organic acids and derivatives			UACCSCEC_ac1c00142_si_002_TS-5.csv
Agmatine Sulfate	C5H14N4	199	C(CCN=C(N)N)CN	[M+H]	128.5	Organic acids and derivatives	Organonitrogen compounds	Guanidines	20190304JAP_CCSdatabase_final.csv
2-ethylhexyl phenyl phosphate	C14H23O4P	15591291	CCCCC(CC)COP(=O)(O)OC1=CC=CC=C1	[M-H]-	170.46	Organic acids and derivatives			UACCSCEC_ac1c00142_si_002_TS-5.csv
3-Methylcrotonyl-CoA	C26H42N7O17P3S	16219611	[Li].CC(=CC(=O)SCCNC(=O)CCNC(=O)C(C(C)(C)COP(=O)(O)OP(=O)(O)OCC1C(C(C(O1)N2C=NC3=C(N=CN=C32)N)O)OP(=O)(O)O)O)C	[M-H]	256.4	Lipids and lipid-like molecules	Fatty acyls	Fatty acyl thioesters	20190304JAP_CCSdatabase_final.csv
D-(+)-Turanose	C12H22O11	5460935	C([C@@H]1[C@H]([C@@H]([C@H]([C@H](O1)O[C@@H]([C@@H]([C@@H](CO)O)O)C(=O)CO)O)O)O)O	[M-H]	178.4	Lipids and lipid-like molecules	Fatty acyls	Fatty acyl glycosides	20190304JAP_CCSdatabase_final.csv
Maltulose Monohydrate	C12H22O11	67584262	C([C@@H]1[C@H]([C@@H]([C@H]([C@H](O1)O[C@H]([C@@H](CO)O)[C@@H](C(=O)CO)O)O)O)O)O.O	[M-H]	180	Lipids and lipid-like molecules	Fatty acyls	Fatty acyl glycosides	20190304JAP_CCSdatabase_final.csv
beta-Glycerophosphate	C3H9O6P	44828775	C(C(C[O-])OP(=O)(O)O)[O-].O.[Na+].[Na+]	[M-H]	126.5	Lipids and lipid-like molecules	Glycerophospholipids	Glycerophosphates	20190304JAP_CCSdatabase_final.csv
2-(beta-Glucosyl)glycerol	C9H18O8	70640512	C(C1[C@H]([C@@H](C([C@@H](O1)OC(CO)CO)O)O)O)O	[M-H]	156.7	Lipids and lipid-like molecules	Glycerolipids	Glycosylglycerols	20190304JAP_CCSdatabase_final.csv
Adipate	C6H10O4	200164	C(CCC(=O)[O-])CC(=O)[O-]	[M-H]	127.5	Lipids and lipid-like molecules	Fatty acyls	Fatty acids and conjugates	20190304JAP_CCSdatabase_final.csv
6-Carboxyhexanoate	C7H12O4	385	C(CCC(=O)O)CCC(=O)O	[M-H]	131.2	Lipids and lipid-like molecules	Fatty acyls	Fatty acids and conjugates	20190304JAP_CCSdatabase_final.csv
6-Aminocaproic Acid	C6H13NO2	564	C(CCC(=O)O)CCN	[M+H]	130.2	Lipids and lipid-like molecules	Fatty acyls	Fatty acids and conjugates	20190304JAP_CCSdatabase_final.csv
Suberate	C8H14O4	10457	C(CCCC(=O)O)CCC(=O)O	[M-H]	136	Lipids and lipid-like molecules	Fatty acyls	Fatty acids and conjugates	20190304JAP_CCSdatabase_final.csv
Azelate	C9H16O4	2266	C(CCCC(=O)O)CCCC(=O)O	[M-H]	140.1	Lipids and lipid-like molecules	Fatty acyls	Fatty acids and conjugates	20190304JAP_CCSdatabase_final.csv
Sebacate	C10H18O4	5192	C(CCCCC(=O)O)CCCC(=O)O	[M-H]	144.2	Lipids and lipid-like molecules	Fatty acyls	Fatty acids and conjugates	20190304JAP_CCSdatabase_final.csv
10-Hydroxydecanoate	C10H20O3	74300	C(CCCCC(=O)O)CCCCO	[M-H]	144.5	Lipids and lipid-like molecules	Fatty acyls	Fatty acids and conjugates	20190304JAP_CCSdatabase_final.csv
2-Methylmaleate	C5H6O4	643798	C/C(=C/C(=O)O)/C(=O)O	[M-H]	118.6	Lipids and lipid-like molecules	Fatty acyls	Fatty acids and conjugates	20190304JAP_CCSdatabase_final.csv
Mevalonate	C6H12O4	439230	C[C@@](CCO)(CC(=O)O)O	[M-H]	129	Lipids and lipid-like molecules	Fatty acyls	Fatty acids and conjugates	20190304JAP_CCSdatabase_final.csv
Thujone	C10H16O	261491	C[C@@H]1[C@H]2C[C@]2(CC1=O)C(C)C	[M+H]	140.9	Lipids and lipid-like molecules	Prenol lipids	Monoterpenoids	20190304JAP_CCSdatabase_final.csv
B-Cortol	C21H36O5	246164	C[C@]12CC[C@H](C[C@H]1CC[C@@H]3[C@@H]2[C@H](C[C@]4([C@H]3CC[C@@]4([C@@H](CO)O)O)C)O)O	[M-H]	202	Lipids and lipid-like molecules	Steroids and steroid derivatives	Hydroxysteroids	20190304JAP_CCSdatabase_final.csv
2,1-Hydroxypregnenolone	C21H32O3	150891	C[C@]12CC[C@H]3[C@H]([C@@H]1CC[C@@H]2C(=O)CO)CC=C4[C@@]3(CCC(C4)O)C	[M+H]	189.3	Lipids and lipid-like molecules	Steroids and steroid derivatives	21-hydroxysteroids	20190304JAP_CCSdatabase_final.csv
2-Methoxyestrone	C19H24O3	440624	C[C@]12CC[C@H]3[C@H]([C@@H]1CCC2=O)CCC4=CC(=C(C=C34)OC)O	[M-H]	183.9	Lipids and lipid-like molecules	Steroids and steroid derivatives	Estrane steroids	20190304JAP_CCSdatabase_final.csv
Cortisol	C21H30O5	5754	C[C@]12CCC(=O)C=C1CC[C@@H]3[C@@H]2[C@H](C[C@]4([C@H]3CC[C@@]4(C(=O)CO)O)C)O	[M-H]	192.1	Lipids and lipid-like molecules	Steroids and steroid derivatives	Hydroxysteroids	20190304JAP_CCSdatabase_final.csv
Corticosterone	C21H30O4	5753	C[C@]12CCC(=O)C=C1CC[C@@H]3[C@@H]2[C@H](C[C@]4([C@H]3CC[C@@H]4C(=O)CO)C)O	[M-H]	186.8	Lipids and lipid-like molecules	Steroids and steroid derivatives	Hydroxysteroids	20190304JAP_CCSdatabase_final.csv
Aldosterone	C21H28O5	5839	C[C@]12CCC(=O)C=C1CC[C@@H]3[C@@H]2[C@H](C[C@]4([C@H]3CC[C@@H]4C(=O)CO)C=O)O	[M-H]	187.7	Lipids and lipid-like molecules	Steroids and steroid derivatives	Hydroxysteroids	20190304JAP_CCSdatabase_final.csv
Cortisone	C21H28O5	222786	C[C@]12CCC(=O)C=C1CC[C@@H]3[C@@H]2C(=O)C[C@]4([C@H]3CC[C@@]4(C(=O)CO)O)C	[M-H]	191.4	Lipids and lipid-like molecules	Steroids and steroid derivatives	Hydroxysteroids	20190304JAP_CCSdatabase_final.csv
Cortexolone	C21H30O4	440707	C[C@]12CCC(=O)C=C1CC[C@@H]3[C@@H]2CC[C@]4([C@H]3CC[C@@]4(C(=O)CO)O)C	[M+H]	187.8	Lipids and lipid-like molecules	Steroids and steroid derivatives	Hydroxysteroids	20190304JAP_CCSdatabase_final.csv
Androstenedione	C19H26O2	6128	C[C@]12CCC(=O)C=C1CC[C@@H]3[C@@H]2CC[C@]4([C@H]3CCC4=O)C	[M+H]	182.8	Lipids and lipid-like molecules	Steroids and steroid derivatives	Androstane steroids	20190304JAP_CCSdatabase_final.csv
Sodium Deoxycholate	C24H40O4	91448	C[C@H](CCC(=O)[O-])[C@H]1CC[C@@H]2[C@@]1([C@H](C[C@H]3[C@H]2CC[C@H]4[C@@]3(CC[C@H](C4)O)C)O)C.[Na+]	[M-H]	202.1	Lipids and lipid-like molecules	Steroids and steroid derivatives	Bile acids, alcohols and derivatives	20190304JAP_CCSdatabase_final.csv
(S)-Glycodeoxycholic Acid	C26H43NO5	13037677	C[C@H](CCC(=O)NCC(=O)[O-])[C@H]1CC[C@@H]2[C@@]1([C@H](C[C@H]3[C@H]2CC[C@H]4[C@@]3(CC[C@H](C4)O)C)O)C.[Na+]	[M-H]	218.2	Lipids and lipid-like molecules	Steroids and steroid derivatives	Bile acids, alcohols and derivatives	20190304JAP_CCSdatabase_final.csv
Glycocholate	C26H43NO6	10140	C[C@H](CCC(=O)NCC(=O)O)[C@H]1CC[C@@H]2[C@@]1([C@H](C[C@H]3[C@H]2[C@@H](C[C@H]4[C@@]3(CC[C@H](C4)O)C)O)O)C	[M-H]	202.2	Lipids and lipid-like molecules	Steroids and steroid derivatives	Bile acids, alcohols and derivatives	20190304JAP_CCSdatabase_final.csv
(S)-Glycocholic Acid	C26H43NO6	24856164	C[C@H](CCC(=O)NCC(=O)O)[C@H]1CC[C@@H]2[C@@]1([C@H](C[C@H]3[C@H]2[C@@H](C[C@H]4[C@@]3(CC[C@H](C4)O)C)O)O)C.O	[M-H]	218.6	Lipids and lipid-like molecules	Steroids and steroid derivatives	Bile acids, alcohols and derivatives	20190304JAP_CCSdatabase_final.csv
(S)-Taurocholic Acid	C26H45NO7S	16218626	C[C@H](CCC(=O)NCCS(=O)(=O)[O-])[C@H]1CC[C@@H]2[C@@]1([C@H](C[C@H]3[C@H]2[C@@H](C[C@H]4[C@@]3(CC[C@H](C4)O)C)O)O)C.O.[Na+]	[M-H]	221.2	Lipids and lipid-like molecules	Steroids and steroid derivatives	Bile acids, alcohols and derivatives	20190304JAP_CCSdatabase_final.csv
(S)-Taurodeoxycholic Acid	C26H45NO6S	16219994	C[C@H](CCC(=O)NCCS(=O)(=O)[O-])[C@H]1CC[C@@H]2[C@@]1([C@H](C[C@H]3[C@H]2CC[C@H]4[C@@]3(CC[C@H](C4)O)C)O)C.O.[Na+]	[M-H]	221	Lipids and lipid-like molecules	Steroids and steroid derivatives	Bile acids, alcohols and derivatives	20190304JAP_CCSdatabase_final.csv
(S)-Taurochenodeoxycholic Acid	C26H45NO6S	54608447	C[C@H](CCC(=O)NCCS(=O)(=O)O)[C@H]1CC[C@@H]2[C@@]1(CC[C@H]3[C@H]2[C@@H](C[C@H]4[C@@]3(CC[C@H](C4)O)C)O)C.[Na+]	[M-H]	221	Lipids and lipid-like molecules	Steroids and steroid derivatives	Bile acids, alcohols and derivatives	20190304JAP_CCSdatabase_final.csv
Lithocholyltaurine	C26H45NO5S	54608445	C[C@H](CCC(=O)NCCS(=O)(=O)O)[C@H]1CC[C@@H]2[C@@]1(CC[C@H]3[C@H]2CC[C@H]4[C@@]3(CC[C@H](C4)O)C)C.[Na+]	[M-H]	206.5	Lipids and lipid-like molecules	Steroids and steroid derivatives	Bile acids, alcohols and derivatives	20190304JAP_CCSdatabase_final.csv
Cholate	C24H40O5	221493	C[C@H](CCC(=O)O)[C@H]1CC[C@@H]2[C@@]1([C@H](C[C@H]3[C@H]2[C@@H](C[C@H]4[C@@]3(CC[C@H](C4)O)C)O)O)C	[M-H]	203.1	Lipids and lipid-like molecules	Steroids and steroid derivatives	Bile acids, alcohols and derivatives	20190304JAP_CCSdatabase_final.csv
Ursocholic Acid	C24H40O5	122340	C[C@H](CCC(=O)O)[C@H]1CC[C@@H]2[C@@]1([C@H](C[C@H]3[C@H]2[C@H](C[C@H]4[C@@]3(CC[C@H](C4)O)C)O)O)C	[M-H]	203.3	Lipids and lipid-like molecules	Steroids and steroid derivatives	Bile acids, alcohols and derivatives	20190304JAP_CCSdatabase_final.csv
Deoxycholate	C24H40O4	222528	C[C@H](CCC(=O)O)[C@H]1CC[C@@H]2[C@@]1([C@H](C[C@H]3[C@H]2CC[C@H]4[C@@]3(CC[C@H](C4)O)C)O)C	[M-H]	202.1	Lipids and lipid-like molecules	Steroids and steroid derivatives	Bile acids, alcohols and derivatives	20190304JAP_CCSdatabase_final.csv
Hyocholic Acid	C24H40O5	92805	C[C@H](CCC(=O)O)[C@H]1CC[C@@H]2[C@@]1(CC[C@H]3[C@H]2[C@@H]([C@@H]([C@H]4[C@@]3(CC[C@H](C4)O)C)O)O)C	[M-H]	204.2	Lipids and lipid-like molecules	Steroids and steroid derivatives	Bile acids, alcohols and derivatives	20190304JAP_CCSdatabase_final.csv
alpha-Muricholic Acid	C24H40O5	5283852	C[C@H](CCC(=O)O)[C@H]1CC[C@@H]2[C@@]1(CC[C@H]3[C@H]2[C@@H]([C@H]([C@H]4[C@@]3(CC[C@H](C4)O)C)O)O)C	[M-H]	205.6	Lipids and lipid-like molecules	Steroids and steroid derivatives	Bile acids, alcohols and derivatives	20190304JAP_CCSdatabase_final.csv
(S)-Chenodeoxycholic Acid	C24H40O4	10133	C[C@H](CCC(=O)O)[C@H]1CC[C@@H]2[C@@]1(CC[C@H]3[C@H]2[C@@H](C[C@H]4[C@@]3(CC[C@H](C4)O)C)O)C	[M-H]	205.9	Lipids and lipid-like molecules	Steroids and steroid derivatives	Bile acids, alcohols and derivatives	20190304JAP_CCSdatabase_final.csv
beta-Muricholic Acid	C24H40O5	5283853	C[C@H](CCC(=O)O)[C@H]1CC[C@@H]2[C@@]1(CC[C@H]3[C@H]2[C@H]([C@H]([C@H]4[C@@]3(CC[C@H](C4)O)C)O)O)C	[M-H]	201.2	Lipids and lipid-like molecules	Steroids and steroid derivatives	Bile acids, alcohols and derivatives	20190304JAP_CCSdatabase_final.csv
Lithocholic Acid	C24H40O3	9903	C[C@H](CCC(=O)O)[C@H]1CC[C@@H]2[C@@]1(CC[C@H]3[C@H]2CC[C@H]4[C@@]3(CC[C@H](C4)O)C)C	[M-H]	201.4	Lipids and lipid-like molecules	Steroids and steroid derivatives	Bile acids, alcohols and derivatives	20190304JAP_CCSdatabase_final.csv
Glutarylcarnitine	C12H21NO6	71317118	C[N+](C)(C)C[C@@H](CC(=O)[O-])OC(=O)CCCC(=O)O	[M-H]	165.5	Lipids and lipid-like molecules	Fatty acyls	Fatty acid esters	20190304JAP_CCSdatabase_final.csv
Deoxycarnitine	C7H15NO2	134	C[N+](C)(C)CCCC(=O)O	[M+H]	129.6	Lipids and lipid-like molecules	Fatty acyls	Fatty acids and conjugates	20190304JAP_CCSdatabase_final.csv
Deoxycarnitine	C7H15NO2	22620	C[N+](C)(C)CCCC(=O)O.[Cl-]	[M+H]	129.7	Lipids and lipid-like molecules	Fatty acyls	Fatty acids and conjugates	20190304JAP_CCSdatabase_final.csv
Itaconate	C5H6O4	811	C=C(CC(=O)O)C(=O)O	[M-H]	119.1	Lipids and lipid-like molecules	Fatty acyls	Fatty acids and conjugates	20190304JAP_CCSdatabase_final.csv
3,5-Dibromo-1-tyrosine	C9H9Br2NO3	67532	C1=C(C=C(C(=C1Br)O)Br)C[C@@H](C(=O)O)N	[M-H]	155.1	Lipids and lipid-like molecules	Prenol lipids	Triterpenoids	20190304JAP_CCSdatabase_final.csv
1,2-Didecanoyl-sn-glycero-3-phosphocholine	C28H56NO8P	288439	C1=CC=C(C=C1)C2=C(N=NC(=N2)Cl)C3=CC=CC=C3	[M+H]	247.4	Lipids and lipid-like molecules	Glycerophospholipids	Glycerophosphocholines	20190304JAP_CCSdatabase_final.csv
Glycerol-3-phosphate	C3H9O6P	16219444	C1CCC(CC1)N.C1CCC(CC1)N.C([C@H](COP(=O)(O)O)O)O	[M-H]	127.4	Lipids and lipid-like molecules	Glycerophospholipids	Glycerophosphates	20190304JAP_CCSdatabase_final.csv
Geranyl Diphosphate	C10H20O7P2	445995	CC(=CCC/C(=C/COP(=O)(O)OP(=O)(O)O)/C)C	[M-H]	167.5	Lipids and lipid-like molecules	Prenol lipids	Isoprenoid phosphates	20190304JAP_CCSdatabase_final.csv
17-alpha-Hydroxyprogesterone	C21H30O3	6238	CC(=O)[C@]1(CC[C@@H]2[C@@]1(CC[C@H]3[C@H]2CCC4=CC(=O)CC[C@]34C)C)O	[M-H]	187	Lipids and lipid-like molecules	Steroids and steroid derivatives	Pregnane steroids	20190304JAP_CCSdatabase_final.csv
17alpha-Hydroxypregnenolone	C21H32O3	440573	CC(=O)[C@]1(CCC2[C@@]1(CC[C@H]3[C@H]2CC=C4[C@@]3(CC[C@@H](C4)O)C)C)O	[M+H]	189.2	Lipids and lipid-like molecules	Steroids and steroid derivatives	Pregnane steroids	20190304JAP_CCSdatabase_final.csv
Pregnenolone	C21H32O2	8955	CC(=O)[C@H]1CC[C@@H]2[C@@]1(CC[C@H]3[C@H]2CC=C4[C@@]3(CC[C@@H](C4)O)C)C	[M+H]	176.1	Lipids and lipid-like molecules	Steroids and steroid derivatives	Pregnane steroids	20190304JAP_CCSdatabase_final.csv
Pregnenolone Sulfate	C21H32O5S	105074	CC(=O)[C@H]1CC[C@@H]2[C@@]1(CC[C@H]3[C@H]2CC=C4[C@@]3(CC[C@@H](C4)OS(=O)(=O)O)C)C	[M-H]	206.2	Lipids and lipid-like molecules	Steroids and steroid derivatives	Sulfated steroids	20190304JAP_CCSdatabase_final.csv
Progesterone	C21H30O2	5994	CC(=O)[C@H]1CC[C@@H]2[C@@]1(CC[C@H]3[C@H]2CCC4=CC(=O)CC[C@]34C)C	[M+H]	185.5	Lipids and lipid-like molecules	Steroids and steroid derivatives	Pregnane steroids	20190304JAP_CCSdatabase_final.csv
O-Acetylcarnitine	C9H17NO4	1	CC(=O)OC(CC(=O)[O-])C[N+](C)(C)C	[M+H]	143.5	Lipids and lipid-like molecules	Fatty acyls	Fatty acid esters	20190304JAP_CCSdatabase_final.csv
Cortisol-21-acetate	C23H32O6	5744	CC(=O)OCC(=O)[C@]1(CC[C@@H]2[C@@]1(C[C@@H]([C@H]3[C@H]2CCC4=CC(=O)CC[C@]34C)O)C)O	[M-H]	196.5	Lipids and lipid-like molecules	Steroids and steroid derivatives	Hydroxysteroids	20190304JAP_CCSdatabase_final.csv
Deoxycorticosterone Acetate	C23H32O4	5952	CC(=O)OCC(=O)[C@H]1CC[C@@H]2[C@@]1(CC[C@H]3[C@H]2CCC4=CC(=O)CC[C@]34C)C	[M+H]	197.1	Lipids and lipid-like molecules	Steroids and steroid derivatives	Hydroxysteroids	20190304JAP_CCSdatabase_final.csv
Methyl Tetracosanoate	C25H50O2	210602	CC(C)(CN)C1=CC=CC=C1	[M+H]	186.3	Lipids and lipid-like molecules	Fatty acyls	Fatty acids and conjugates	20190304JAP_CCSdatabase_final.csv
Malonyl-CoA	C24H38N7O19P3S	644066	CC(C)(COP(=O)(O)OP(=O)(O)OC[C@@H]1[C@H]([C@H]([C@@H](O1)N2C=NC3=C(N=CN=C32)N)O)OP(=O)(O)O)[C@H](C(=O)NCCC(=O)NCCSC(=O)CC(=O)O)O	[M-H]	252.2	Lipids and lipid-like molecules	Fatty acyls	Fatty acyl thioesters	20190304JAP_CCSdatabase_final.csv
3-Hydroxy-3-methylglutaryl-CoA	C27H44N7O20P3S	16219482	CC(C)(COP(=O)(O)OP(=O)(O)OCC1C(C(C(O1)N2C=NC3=C(N=CN=C32)N)O)OP(=O)(O)O)C(C(=O)NCCC(=O)NCCSC(=O)CC(C)(CC(=O)O)O)O.[Na]	[M-H]	261.7	Lipids and lipid-like molecules	Fatty acyls	Fatty acyl thioesters	20190304JAP_CCSdatabase_final.csv
Citramalic Acid	C5H8O5	1081	CC(CC(=O)O)(C(=O)O)O	[M-H]	123.1	Lipids and lipid-like molecules	Fatty acyls	Fatty acids and conjugates	20190304JAP_CCSdatabase_final.csv
3-Hydroxymethylglutarate	C6H10O5	1662	CC(CC(=O)O)(CC(=O)O)O	[M-H]	126.9	Lipids and lipid-like molecules	Fatty acyls	Fatty acids and conjugates	20190304JAP_CCSdatabase_final.csv
Methylsuccinic Acid	C5H8O4	10349	CC(CC(=O)O)C(=O)O	[M-H]	123.9	Lipids and lipid-like molecules	Fatty acyls	Fatty acids and conjugates	20190304JAP_CCSdatabase_final.csv
3-Methyglutarate	C6H10O4	12284	CC(CC(=O)O)CC(=O)O	[M-H]	126.3	Lipids and lipid-like molecules	Fatty acyls	Fatty acids and conjugates	20190304JAP_CCSdatabase_final.csv
Glycochenodeoxycholate	C26H43NO5	27928	CC(CCC(=O)NCC(=O)[O-])C1CCC2C1(CCC3C2C(CC4C3(CCC(C4)O)C)O)C.[Na+]	[M-H]	200.6	Lipids and lipid-like molecules	Steroids and steroid derivatives	Bile acids, alcohols and derivatives	20190304JAP_CCSdatabase_final.csv
(S)-Glycolithocholic Acid	C26H43NO4	14849362	CC(CCC(=O)NCC(=O)[O-])C1CCC2C1(CCC3C2CCC4C3(CCC(C4)O)C)C.[Na+]	[M-H]	218.2	Lipids and lipid-like molecules	Steroids and steroid derivatives	Bile acids, alcohols and derivatives	20190304JAP_CCSdatabase_final.csv
2-Methylglutarate	C6H10O4	12046	CC(CCC(=O)O)C(=O)O	[M-H]	126.3	Lipids and lipid-like molecules	Fatty acyls	Fatty acids and conjugates	20190304JAP_CCSdatabase_final.csv
Sulfolithocholic Acid	C24H40O6S	4388803	CC(CCC(=O)O)C1CCC2C1(CCC3C2CCC4C3(CCC(C4)OS(=O)(=O)O)C)C	[M-H]	211.5	Lipids and lipid-like molecules	Steroids and steroid derivatives	Bile acids, alcohols and derivatives	20190304JAP_CCSdatabase_final.csv
Thromboxane B3	C20H32O6	6438711	CC/C=C/CC(/C=C/C1C(C(CC(O1)O)O)C/C=C/CCCC(=O)O)O	[M-H]	190.5	Lipids and lipid-like molecules	Fatty acyls	Eicosanoids	20190304JAP_CCSdatabase_final.csv
Docosahexaenoic Acid	C22H32O2	445580	CC/C=C\C/C=C\C/C=C\C/C=C\C/C=C\C/C=C\CCC(=O)O	[M-H]	190.5	Lipids and lipid-like molecules	Fatty acyls	Fatty acids and conjugates	20190304JAP_CCSdatabase_final.csv
alpha-Linolenic acid (PC18:3)	C18H30O2	5280934	CC/C=C\C/C=C\C/C=C\CCCCCCCC(=O)O	[M-H]	173.9	Lipids and lipid-like molecules	Fatty acyls	Lineolic acids and derivatives	20190304JAP_CCSdatabase_final.csv
Camphene	C10H16	6616	CC1(C2CCC(C2)C1=C)C	[M+H]	129.8	Lipids and lipid-like molecules	Prenol lipids	Monoterpenoids	20190304JAP_CCSdatabase_final.csv
Camphor	C10H16O	2537	CC1(C2CCC1(C(=O)C2)C)C	[M+H]	141.9	Lipids and lipid-like molecules	Prenol lipids	Monoterpenoids	20190304JAP_CCSdatabase_final.csv
Vitamin K2	C31H40O2	5282367	CC1=C(C(=O)C2=CC=CC=C2C1=O)C/C=C(\C)/CC/C=C(\C)/CC/C=C(\C)/CCC=C(C)C	[M+H]	197.4	Lipids and lipid-like molecules	Prenol lipids	Quinone and hydroquinone lipids	20190304JAP_CCSdatabase_final.csv
gamma,beta-Tocopherol	C28H48O2	92729	CC1=C(C=C2CC[C@@](OC2=C1C)(C)CCC[C@H](C)CCC[C@H](C)CCCC(C)C)O	[M-H]	207.9	Lipids and lipid-like molecules	Prenol lipids	Quinone and hydroquinone lipids	20190304JAP_CCSdatabase_final.csv
alpha-Tocopherol	C29H50O2	14985	CC1=C(C2=C(CC[C@@](O2)(C)CCC[C@H](C)CCC[C@H](C)CCCC(C)C)C(=C1O)C)C	[M-H]	208.9	Lipids and lipid-like molecules	Prenol lipids	Quinone and hydroquinone lipids	20190304JAP_CCSdatabase_final.csv
Abscisic Acid	C15H20O4	5280896	CC1=CC(=O)CC([C@]1(/C=C/C(=C\C(=O)O)/C)O)(C)C	[M-H]	173.8	Lipids and lipid-like molecules	Prenol lipids	Sesquiterpenoids	20190304JAP_CCSdatabase_final.csv
1-Stearoyl-2-oleoyl-sn-glycero-3-phosphoethanolamine	C41H80NO8P	2282158	CC1=CC2=C(C=C1)OC(=N2)C3=CC(=CC=C3)NC(=O)C4=C(C(=CC=C4)Cl)Cl	[M-H]	273.5	Lipids and lipid-like molecules	Glycerophospholipids	Glycerophosphoethanolamines	20190304JAP_CCSdatabase_final.csv
Thymine	C5H6N2O2	1135	CC1=CNC(=O)NC1=O	[M-H]	119.5	Lipids and lipid-like molecules	Fatty acyls	Fatty acids and conjugates	20190304JAP_CCSdatabase_final.csv
(S)-Ursodeoxycholic Acid	C24H40O4	4173	CC1=NC=C(N1CCO)[N+](=O)[O-]	[M-H]	200.5	Lipids and lipid-like molecules	Steroids and steroid derivatives	Bile acids, alcohols and derivatives	20190304JAP_CCSdatabase_final.csv
D-Desthiobin	C10H18N2O3	643	CC1C(NC(=O)N1)CCCCCC(=O)O	[M-H]	154.7	Lipids and lipid-like molecules	Fatty acyls	Fatty acids and conjugates	20190304JAP_CCSdatabase_final.csv
Resolvin D2	C22H32O5	53394040	CCC=CCC(C(C=CC=CC=CC=CC(CC=CCCC(=O)O)O)O)O	[M-H]	194.2	Lipids and lipid-like molecules	Fatty acyls	Fatty acids and conjugates	20190304JAP_CCSdatabase_final.csv
Resolvin D1	C22H32O5	53394122	CCC=CCC(C=CC=CC=CC=CC(C(CC=CCCC(=O)O)O)O)O	[M-H]	198.2	Lipids and lipid-like molecules	Fatty acyls	Fatty acids and conjugates	20190304JAP_CCSdatabase_final.csv
7(S)-Maresin-1	C22H32O4	53394130	CCC=CCC=CCC(C=CC=CC=CC(CC=CCCC(=O)O)O)O	[M-H]	192.8	Lipids and lipid-like molecules	Fatty acyls	Fatty acids and conjugates	20190304JAP_CCSdatabase_final.csv
omega-3-Arachidonic Acid	C20H32O2	3080584	CCC=CCC=CCC=CCC=CCCCCCCC(=O)O	[M-H]	186.7	Lipids and lipid-like molecules	Fatty acyls	Fatty acids and conjugates	20190304JAP_CCSdatabase_final.csv
1,2-Diarachidonoyl-sn-glycero-3-phosphoethanolamine	C45H74NO8P	6441301	CCCCC/C=C/C/C=C/C/C=C/C/C=C/CCCC(=O)OC[C@H](COP(=O)(O)OCCN)OC(=O)CCC/C=C/C/C=C/C/C=C/C/C=C/CCCCC	[M-H]	277.3	Lipids and lipid-like molecules	Glycerophospholipids	Glycerophosphoethanolamines	20190304JAP_CCSdatabase_final.csv
8(9)-EET	C20H32O3	5353364	CCCCC/C=C/C/C=C/CC1C(O1)C/C=C/CCCC(=O)O	[M-H]	184	Lipids and lipid-like molecules	Fatty acyls	Fatty acids and conjugates	20190304JAP_CCSdatabase_final.csv
11(12)-EET	C20H32O3	5353269	CCCCC/C=C/CC1C(O1)C/C=C/C/C=C/CCCC(=O)O	[M-H]	184.4	Lipids and lipid-like molecules	Fatty acyls	Eicosanoids	20190304JAP_CCSdatabase_final.csv
Arachidonic Acid (20:4)	C20H32O2	444899	CCCCC/C=C\C/C=C\C/C=C\C/C=C\CCCC(=O)O	[M-H]	183	Lipids and lipid-like molecules	Fatty acyls	Fatty acids and conjugates	20190304JAP_CCSdatabase_final.csv
Adrenic Acid	C22H32O2	5497181	CCCCC/C=C\C/C=C\C/C=C\C/C=C\CCCCCC(=O)O	[M-H]	190.3	Lipids and lipid-like molecules	Fatty acyls	Fatty acids and conjugates	20190304JAP_CCSdatabase_final.csv
5(S)-HETE	C20H32O3	5280733	CCCCC/C=C\C/C=C\C/C=C\C=C\[C@H](CCCC(=O)O)O	[M-H]	186.6	Lipids and lipid-like molecules	Fatty acyls	Eicosanoids	20190304JAP_CCSdatabase_final.csv
gamma-Linolenate	C18H30O2	5280933	CCCCC/C=C\C/C=C\C/C=C\CCCCC(=O)O	[M-H]	174.5	Lipids and lipid-like molecules	Fatty acyls	Lineolic acids and derivatives	20190304JAP_CCSdatabase_final.csv
Bishomo-gamma-linolenic Acid (20:3)	C20H34O2	5280581	CCCCC/C=C\C/C=C\C/C=C\CCCCCCC(=O)O	[M-H]	182	Lipids and lipid-like molecules	Fatty acyls	Fatty acids and conjugates	20190304JAP_CCSdatabase_final.csv
8(S)-HETE	C20H32O3	5283154	CCCCC/C=C\C/C=C\C=C\[C@H](C/C=C\CCCC(=O)O)O	[M-H]	184.4	Lipids and lipid-like molecules	Fatty acyls	Eicosanoids	20190304JAP_CCSdatabase_final.csv
Leukotriene D4	C25H40N2O6S	5280878	CCCCC/C=C\C/C=C\C=C\C=C\[C@H]([C@H](CCCC(=O)O)O)SC[C@@H](C(=O)NCC(=O)O)N	[M-H]	225.5	Lipids and lipid-like molecules	Fatty acyls	Eicosanoids	20190304JAP_CCSdatabase_final.csv
Leukotriene E4	C23H37NO5S	5280879	CCCCC/C=C\C/C=C\C=C\C=C\[C@H]([C@H](CCCC(=O)O)O)SC[C@@H](C(=O)O)N	[M-H]	213.2	Lipids and lipid-like molecules	Fatty acyls	Eicosanoids	20190304JAP_CCSdatabase_final.csv
Linoleic Acid (18:2)	C18H32O2	5280450	CCCCC/C=C\C/C=C\CCCCCCCC(=O)O	[M-H]	174.6	Lipids and lipid-like molecules	Fatty acyls	Lineolic acids and derivatives	20190304JAP_CCSdatabase_final.csv
Methyl Linoleate	C19H34O2	5284421	CCCCC/C=C\C/C=C\CCCCCCCC(=O)OC	[M-H]	182.6	Lipids and lipid-like molecules	Fatty acyls	Lineolic acids and derivatives	20190304JAP_CCSdatabase_final.csv
Eicosadienoic Acid (20:2)	C20H36O2	6439848	CCCCC/C=C\C/C=C\CCCCCCCCCC(=O)O	[M-H]	181.8	Lipids and lipid-like molecules	Fatty acyls	Fatty acids and conjugates	20190304JAP_CCSdatabase_final.csv
12(S)-HETE	C20H32O3	5283155	CCCCC/C=C\C[C@@H](/C=C/C=C\C/C=C\CCCC(=O)O)O	[M-H]	184.2	Lipids and lipid-like molecules	Fatty acyls	Eicosanoids	20190304JAP_CCSdatabase_final.csv
Leukotriene B4	C20H32O4	5280492	CCCCC/C=C\C[C@H](/C=C/C=C/C=C\[C@H](CCCC(=O)O)O)O	[M-H]	186.8	Lipids and lipid-like molecules	Fatty acyls	Eicosanoids	20190304JAP_CCSdatabase_final.csv
12(R)-HETE	C20H32O3	5283156	CCCCC/C=C\C[C@H](/C=C/C=C\C/C=C\CCCC(=O)O)O	[M-H]	183.5	Lipids and lipid-like molecules	Fatty acyls	Eicosanoids	20190304JAP_CCSdatabase_final.csv
9-HODE	C18H32O3	5282944	CCCCC/C=C\C=C\C(CCCCCCCC(=O)O)O	[M-H]	180	Lipids and lipid-like molecules	Fatty acyls	Lineolic acids and derivatives	20190304JAP_CCSdatabase_final.csv
Thromboxane B2	C20H34O6	5280890	CCCCC[C@@H](/C=C/[C@@H]1[C@H]([C@H](C[C@H](O1)O)O)C/C=C\CCCC(=O)O)O	[M-H]	193.8	Lipids and lipid-like molecules	Fatty acyls	Eicosanoids	20190304JAP_CCSdatabase_final.csv
Prostaglandin D2	C20H32O5	448457	CCCCC[C@@H](/C=C/[C@@H]1[C@H]([C@H](CC1=O)O)C/C=C\CCCC(=O)O)O	[M-H]	189.4	Lipids and lipid-like molecules	Fatty acyls	Eicosanoids	20190304JAP_CCSdatabase_final.csv
Prostaglandin F2alpha	C20H34O5	5280363	CCCCC[C@@H](/C=C/[C@H]1[C@@H](C[C@@H]([C@@H]1C/C=C\CCCC(=O)O)O)O)O	[M-H]	194.1	Lipids and lipid-like molecules	Fatty acyls	Eicosanoids	20190304JAP_CCSdatabase_final.csv
6-keto-Prostaglandin F1alpha	C20H34O6	5280888	CCCCC[C@@H](/C=C/[C@H]1[C@@H](C[C@@H]([C@@H]1CC(=O)CCCCC(=O)O)O)O)O	[M-H]	196	Lipids and lipid-like molecules	Fatty acyls	Eicosanoids	20190304JAP_CCSdatabase_final.csv
8-iso-Prostaglandin F2alpha	C20H34O5	5282263	CCCCC[C@@H](/C=C/[C@H]1[C@@H](C[C@@H]([C@H]1C/C=C\CCCC(=O)O)O)O)O	[M-H]	196.6	Lipids and lipid-like molecules	Fatty acyls	Eicosanoids	20190304JAP_CCSdatabase_final.csv
Prostaglandin I2 Sodium Salt	C20H32O5	5282410	CCCCC[C@@H](/C=C/[C@H]1[C@@H](C[C@H]2[C@@H]1C/C(=C/CCCC(=O)[O-])/O2)O)O.[Na+]	[M-H]	191.9	Lipids and lipid-like molecules	Fatty acyls	Eicosanoids	20190304JAP_CCSdatabase_final.csv
Prostaglandin H2	C20H32O5	445049	CCCCC[C@@H](/C=C/[C@H]1[C@H]2C[C@@H]([C@@H]1C/C=C\CCCC(=O)O)OO2)O	[M-H]	190.2	Lipids and lipid-like molecules	Fatty acyls	Eicosanoids	20190304JAP_CCSdatabase_final.csv
Prostaglandin G2	C20H32O6	5280883	CCCCC[C@@H](/C=C/[C@H]1[C@H]2C[C@@H]([C@@H]1C/C=C\CCCC(=O)O)OO2)OO	[M-H]	193.6	Lipids and lipid-like molecules	Fatty acyls	Eicosanoids	20190304JAP_CCSdatabase_final.csv
Lipoxin A4	C20H32O5	5280914	CCCCC[C@@H](/C=C/C=C\C=C\C=C\[C@H]([C@H](CCCC(=O)O)O)O)O	[M-H]	193.3	Lipids and lipid-like molecules	Fatty acyls	Eicosanoids	20190304JAP_CCSdatabase_final.csv
15(R)-Prostaglandin F2alpha	C20H34O5	5283046	CCCCC[C@H](/C=C/[C@H]1[C@@H](C[C@@H]([C@@H]1C/C=C\CCCC(=O)O)O)O)O	[M-H]	192.7	Lipids and lipid-like molecules	Fatty acyls	Eicosanoids	20190304JAP_CCSdatabase_final.csv
8-iso-15(R)-Prostaglandin F2alpha	C20H34O5	35022907	CCCCC[C@H](/C=C/[C@H]1[C@@H](C[C@@H]([C@H]1C/C=C\CCCC(=O)O)O)O)O	[M-H]	197.7	Lipids and lipid-like molecules	Fatty acyls	Eicosanoids	20190304JAP_CCSdatabase_final.csv
13-HODE	C18H32O3	5282948	CCCCCC(/C=C/C=C/CCCCCCCC(=O)O)O	[M-H]	182.5	Lipids and lipid-like molecules	Fatty acyls	Lineolic acids and derivatives	20190304JAP_CCSdatabase_final.csv
13-OxoODE	C18H30O3	6446027	CCCCCC(=O)/C=C/C=C\CCCCCCCC(=O)O	[M-H]	179.8	Lipids and lipid-like molecules	Fatty acyls	Lineolic acids and derivatives	20190304JAP_CCSdatabase_final.csv
1,2-Dihexanoyl-sn-glycero-3-phosphoethanolamine	C17H34NO8P	9546806	CCCCCC(=O)OC[C@H](COP(=O)(O)OCCN)OC(=O)CCCCC	[M-H]	201.8	Lipids and lipid-like molecules	Glycerophospholipids	Glycerophosphoethanolamines	20190304JAP_CCSdatabase_final.csv
Palmitoleic Acid (16:1)	C16H30O2	445638	CCCCCC/C=C\CCCCCCCC(=O)O	[M-H]	167.3	Lipids and lipid-like molecules	Fatty acyls	Fatty acids and conjugates	20190304JAP_CCSdatabase_final.csv
1,2-Dipalmitoleoyl-sn-glycero-3-phosphoethanolamine	C37H70NO8P	9546809	CCCCCC/C=C\CCCCCCCC(=O)OC[C@H](COP(=O)(O)OCCN)OC(=O)CCCCCCC/C=C\CCCCCC	[M-H]	289.5	Lipids and lipid-like molecules	Glycerophospholipids	Glycerophosphoethanolamines	20190304JAP_CCSdatabase_final.csv
9-OxoODE	C18H30O3	193923	CCCCCC=CC=CC(=O)CCCCCCCC(=O)O	[M-H]	180	Lipids and lipid-like molecules	Fatty acyls	Lineolic acids and derivatives	20190304JAP_CCSdatabase_final.csv
5-iPF2alpha-VI	C20H34O5	53394198	CCCCCC=CCC1C(CC(C1C=CC(CCCC(=O)O)O)O)O	[M-H]	194.3	Lipids and lipid-like molecules	Fatty acyls	Eicosanoids	20190304JAP_CCSdatabase_final.csv
14(15)-EET	C20H32O3	5283205	CCCCCC1C(O1)C/C=C\C/C=C\C/C=C\CCCC(=O)O	[M-H]	187	Lipids and lipid-like molecules	Fatty acyls	Fatty acids and conjugates	20190304JAP_CCSdatabase_final.csv
Elaidate	C18H34O2	637517	CCCCCCCC/C=C/CCCCCCCC(=O)O	[M-H]	175.9	Lipids and lipid-like molecules	Fatty acyls	Fatty acids and conjugates	20190304JAP_CCSdatabase_final.csv
PC (18:1/18:1) (del9-trans)	C44H84NO8P	5364680	CCCCCCCC/C=C/CCCCCCCC(=O)OCC(COP(=O)([O-])OCC[N+](C)(C)C)OC(=O)CCCCCCC/C=C/CCCCCCCC	[M+H]	293.3	Lipids and lipid-like molecules	Glycerophospholipids	Glycerophosphocholines	20190304JAP_CCSdatabase_final.csv
Oleic Acid (18:1)	C18H34O2	445639	CCCCCCCC/C=C\CCCCCCCC(=O)O	[M-H]	175.6	Lipids and lipid-like molecules	Fatty acyls	Fatty acids and conjugates	20190304JAP_CCSdatabase_final.csv
Carnitine 18:1(delta9-cis)	C25H47NO4	46907933	CCCCCCCC/C=C\CCCCCCCC(=O)O[C@H](CC(=O)[O-])C[N+](C)(C)C	[M+H]	217.3	Lipids and lipid-like molecules	Fatty acyls	Fatty acid esters	20190304JAP_CCSdatabase_final.csv
LysoPC (18:1)	C26H52NO7P	16081932	CCCCCCCC/C=C\CCCCCCCC(=O)OC[C@H](COP(=O)([O-])OCC[N+](C)(C)C)O	[M+H]	233.2	Lipids and lipid-like molecules	Glycerophospholipids	Glycerophosphocholines	20190304JAP_CCSdatabase_final.csv
PE (18:1/18:1) (del9-cis)	C41H78NO8P	9546757	CCCCCCCC/C=C\CCCCCCCC(=O)OC[C@H](COP(=O)(O)OCCN)OC(=O)CCCCCCC/C=C\CCCCCCCC	[M-H]	274	Lipids and lipid-like molecules	Glycerophospholipids	Glycerophosphoethanolamines	20190304JAP_CCSdatabase_final.csv
Oleoyl-glycerol	C21H40O4	5283468	CCCCCCCC/C=C\CCCCCCCC(=O)OCC(CO)O	[M+H]	202.9	Lipids and lipid-like molecules	Glycerolipids	Monoradylglycerols	20190304JAP_CCSdatabase_final.csv
cis-Gondoic Acid	C20H38O2	5282768	CCCCCCCC/C=C\CCCCCCCCCC(=O)O	[M-H]	184.1	Lipids and lipid-like molecules	Fatty acyls	Fatty acids and conjugates	20190304JAP_CCSdatabase_final.csv
Nervonate	C24H46O2	5281120	CCCCCCCC/C=C\CCCCCCCCCCCCCC(=O)O	[M-H]	197.3	Lipids and lipid-like molecules	Fatty acyls	Fatty acids and conjugates	20190304JAP_CCSdatabase_final.csv
1,2-Didecanoyl-sn-glycero-3-phosphoethanolamine	C25H50NO8P	9546803	CCCCCCCCCC(=O)OC[C@H](COP(=O)(O)OCCN)OC(=O)CCCCCCCCC	[M-H]	225.9	Lipids and lipid-like molecules	Glycerophospholipids	Glycerophosphoethanolamines	20190304JAP_CCSdatabase_final.csv
Petroselinate	C18H34O2	5281125	CCCCCCCCCCC/C=C\CCCCC(=O)O	[M-H]	175.5	Lipids and lipid-like molecules	Fatty acyls	Fatty acids and conjugates	20190304JAP_CCSdatabase_final.csv
Lauric Acid (12:0)	C12H24O2	3893	CCCCCCCCCCCC(=O)O	[M-H]	154.2	Lipids and lipid-like molecules	Fatty acyls	Fatty acids and conjugates	20190304JAP_CCSdatabase_final.csv
Lauroyl-L-carnitine	C19H37NO4	168381	CCCCCCCCCCCC(=O)O[C@H](CC(=O)[O-])C[N+](C)(C)C	[M+H]	199.5	Lipids and lipid-like molecules	Fatty acyls	Fatty acid esters	20190304JAP_CCSdatabase_final.csv
1,2-Dilauroyl-sn-glycero-3-phosphoethanolamine	C29H58NO8P	9546801	CCCCCCCCCCCC(=O)OC[C@H](COP(=O)(O)OCCN)OC(=O)CCCCCCCCCCC	[M-H]	238.5	Lipids and lipid-like molecules	Glycerophospholipids	Glycerophosphoethanolamines	20190304JAP_CCSdatabase_final.csv
D-glucosyl-beta1-1'-D-erythro-sphingosine	C24H47NO7	5280570	CCCCCCCCCCCCC/C=C/[C@H]([C@H](CO[C@H]1[C@@H]([C@H]([C@@H]([C@H](O1)CO)O)O)O)N)O	[M-H]	214	Lipids and lipid-like molecules	Sphingolipids	Glycosphingolipids	20190304JAP_CCSdatabase_final.csv
LysoPC (14:0/0:0)	C22H46NO7P	460604	CCCCCCCCCCCCCC(=O)OC[C@H](COP(=O)([O-])OCC[N+](C)(C)C)O	[M+H]	220.8	Lipids and lipid-like molecules	Glycerophospholipids	Glycerophosphocholines	20190304JAP_CCSdatabase_final.csv
1,2-Dimyristoyl-sn-glycero-3-phosphoethanolamine	C33H66NO8P	9852308	CCCCCCCCCCCCCC(=O)OC[C@H](COP(=O)(O)OCCN)OC(=O)CCCCCCCCCCCCC	[M-H]	250.8	Lipids and lipid-like molecules	Glycerophospholipids	Glycerophosphoethanolamines	20190304JAP_CCSdatabase_final.csv
1,2-Diacyl-sn-glycero-3-phosphocholine	C10H18NO8P	26197	CCCCCCCCCCCCCC(=O)OCC(COP(=O)([O-])OCC[N+](C)(C)C)OC(=O)CCCCCCCCCCCCC	[M+H]	188.4	Lipids and lipid-like molecules	Glycerophospholipids	Glycerophosphocholines	20190304JAP_CCSdatabase_final.csv
Pentadecanoic Acid (15:0)	C15H30O2	13849	CCCCCCCCCCCCCCC(=O)O	[M-H]	165	Lipids and lipid-like molecules	Fatty acyls	Fatty acids and conjugates	20190304JAP_CCSdatabase_final.csv
1,2-Dipentadecanoyl-sn-glycero-3-phosphoethanolamine	C35H70NO8P	9546807	CCCCCCCCCCCCCCC(=O)OC[C@H](COP(=O)(O)OCCN)OC(=O)CCCCCCCCCCCCCC	[M-H]	256.3	Lipids and lipid-like molecules	Glycerophospholipids	Glycerophosphoethanolamines	20190304JAP_CCSdatabase_final.csv
Palmitate	C16H32O2	985	CCCCCCCCCCCCCCCC(=O)O	[M-H]	168.7	Lipids and lipid-like molecules	Fatty acyls	Fatty acids and conjugates	20190304JAP_CCSdatabase_final.csv
Carnitine (16:0)	C23H45NO4	11953816	CCCCCCCCCCCCCCCC(=O)O[C@H](CC(=O)[O-])C[N+](C)(C)C	[M+H]	214.7	Lipids and lipid-like molecules	Fatty acyls	Fatty acid esters	20190304JAP_CCSdatabase_final.csv
PC (18:1(9Z)/16:0)	C42H82NO8P	24778933	CCCCCCCCCCCCCCCC(=O)O[C@H](COC(=O)CCCCCCC/C=C\CCCCCCCC)COP(=O)([O-])OCC[N+](C)(C)C	[M+H]	287.9	Lipids and lipid-like molecules	Glycerophospholipids	Glycerophosphocholines	20190304JAP_CCSdatabase_final.csv
Palmitoylcarnitine	C23H45NO4	363417	CCCCCCCCCCCCCCCC(=O)OC(CC(=O)O)C[N+](C)(C)C.[Cl-]	[M+H]	213.8	Lipids and lipid-like molecules	Fatty acyls	Fatty acid esters	20190304JAP_CCSdatabase_final.csv
16:0 Lyso PC	C24H50NO7P	460602	CCCCCCCCCCCCCCCC(=O)OC[C@H](COP(=O)([O-])OCC[N+](C)(C)C)O	[M+H]	231.4	Lipids and lipid-like molecules	Glycerophospholipids	Glycerophosphocholines	20190304JAP_CCSdatabase_final.csv
PC (16:0/2:0)	C26H52NO8P	16759367	CCCCCCCCCCCCCCCC(=O)OC[C@H](COP(=O)([O-])OCC[N+](C)(C)C)OC(=O)C	[M+H]	239.7	Lipids and lipid-like molecules	Glycerophospholipids	Glycerophosphocholines	20190304JAP_CCSdatabase_final.csv
1-Palmitoyl-2-oleoyl-sn-glycero-3-phosphoethanolamine	C39H76NO8P	5283496	CCCCCCCCCCCCCCCC(=O)OC[C@H](COP(=O)(O)OCCN)OC(=O)CCCCCCC/C=C\CCCCCCCC	[M-H]	267.5	Lipids and lipid-like molecules	Glycerophospholipids	Glycerophosphoethanolamines	20190304JAP_CCSdatabase_final.csv
1,2-Dipalmitoyl-sn-glycero-3-phosphoethanolamine	C37H74NO8P	445468	CCCCCCCCCCCCCCCC(=O)OC[C@H](COP(=O)(O)OCCN)OC(=O)CCCCCCCCCCCCCCC	[M-H]	262.5	Lipids and lipid-like molecules	Glycerophospholipids	Glycerophosphoethanolamines	20190304JAP_CCSdatabase_final.csv
Dipalmitoyl-Phosphoethanolamine	C37H74NO8P	65109	CCCCCCCCCCCCCCCC(=O)OCC(COP(=O)(O)OCCN)OC(=O)CCCCCCCCCCCCCCC	[M-H]	261.8	Lipids and lipid-like molecules	Glycerophospholipids	Glycerophosphoethanolamines	20190304JAP_CCSdatabase_final.csv
C17 Ceramide	C35H69NO3	44584335	CCCCCCCCCCCCCCCCC(=O)N[C@@H](CO)[C@@H](/C=C/CCCCCCCCCCCCC)O	[M-H]	235.6	Lipids and lipid-like molecules	Sphingolipids	Ceramides	20190304JAP_CCSdatabase_final.csv
FA (17:0)	C17H34O2	10465	CCCCCCCCCCCCCCCCC(=O)O	[M-H]	164.1	Lipids and lipid-like molecules	Fatty Acyls	Fatty acids and conjugates	20190304JAP_CCSdatabase_final.csv
1,2-Diheptadecanoyl-sn-glycero-3-phosphoethanolamine	C39H78NO8P	46891874	CCCCCCCCCCCCCCCCC(=O)OC[C@H](COP(=O)([O-])OCC[NH3+])OC(=O)CCCCCCCCCCCCCCCC	[M-H]	268.6	Lipids and lipid-like molecules	Glycerophospholipids	Glycerophosphoethanolamines	20190304JAP_CCSdatabase_final.csv
Stearic Acid (18:0)	C18H36O2	5281	CCCCCCCCCCCCCCCCCC(=O)O	[M-H]	177.1	Lipids and lipid-like molecules	Fatty acyls	Fatty acids and conjugates	20190304JAP_CCSdatabase_final.csv
2-18:0 Lyso PC	C26H54NO7P	6441487	CCCCCCCCCCCCCCCCCC(=O)OC[C@H](COP(=O)([O-])OCC[N+](C)(C)C)OC(=O)CCCCCCC/C=C\C/C=C\CCCCC	[M+H]	240.7	Lipids and lipid-like molecules	Glycerophospholipids	Glycerophosphocholines	20190304JAP_CCSdatabase_final.csv
1,2-Distearoyl-sn-glycero-3-phosphoethanolamine	C41H82NO8P	447078	CCCCCCCCCCCCCCCCCC(=O)OC[C@H](COP(=O)(O)OCCN)OC(=O)CCCCCCCCCCCCCCCCC	[M-H]	274.6	Lipids and lipid-like molecules	Glycerophospholipids	Glycerophosphoethanolamines	20190304JAP_CCSdatabase_final.csv
18:0 Lyso PC	C26H54NO7P	86556	CCCCCCCCCCCCCCCCCC(=O)OCC(COP(=O)([O-])OCC[N+](C)(C)C)O	[M+H]	238.8	Lipids and lipid-like molecules	Glycerophospholipids	Glycerophosphocholines	20190304JAP_CCSdatabase_final.csv
FA (19:0)	C19H38O2	12591	CCCCCCCCCCCCCCCCCCC(=O)O	[M+H]	196.5	Lipids and lipid-like molecules	Fatty Acyls	Fatty acids and conjugates	20190304JAP_CCSdatabase_final.csv
LysoPC (19:0)	C27H56NO7P	24779472	CCCCCCCCCCCCCCCCCCC(=O)OC[C@H](COP(=O)([O-])OCC[N+](C)(C)C)O	[M+H]	240.5	Lipids and lipid-like molecules	Glycerophospholipids	Glycerophosphocholines	20190304JAP_CCSdatabase_final.csv
Eicosanoic Acid (20:0)	C20H40O2	10467	CCCCCCCCCCCCCCCCCCCC(=O)O	[M-H]	185	Lipids and lipid-like molecules	Fatty acyls	Fatty acids and conjugates	20190304JAP_CCSdatabase_final.csv
LysoPC (20:0)	C28H58NO7P	24779473	CCCCCCCCCCCCCCCCCCCC(=O)OC[C@H](COP(=O)([O-])OCC[N+](C)(C)C)O	[M+H]	247	Lipids and lipid-like molecules	Glycerophospholipids	Glycerophosphocholines	20190304JAP_CCSdatabase_final.csv
Methyl Behenate	C23H46O2	13584	CCCCCCCCCCCCCCCCCCCCCC(=O)OC	[M-H]	155.6	Lipids and lipid-like molecules	Fatty acyls	Fatty acid esters	20190304JAP_CCSdatabase_final.csv
Tricosanoate	C23H46O2	17085	CCCCCCCCCCCCCCCCCCCCCCC(=O)O	[M-H]	196.7	Lipids and lipid-like molecules	Fatty acyls	Fatty acids and conjugates	20190304JAP_CCSdatabase_final.csv
Lignoceric Acid (24:0)	C24H48O2	11197	CCCCCCCCCCCCCCCCCCCCCCCC(=O)O	[M-H]	199.9	Lipids and lipid-like molecules	Fatty acyls	Fatty acids and conjugates	20190304JAP_CCSdatabase_final.csv
LysoPC (P-18:0)	C26H54NO6P	2733532	CCCCCCCCCCCCCCCCCCOC[C@H](COP(=O)([O-])OCC[N+](C)(C)C)O	[M+H]	235.5	Lipids and lipid-like molecules	Glycerophospholipids	Glycerophosphocholines	20190304JAP_CCSdatabase_final.csv
PC (O-18:0/2:0)	C28H58NO7P	2733535	CCCCCCCCCCCCCCCCCCOC[C@H](COP(=O)([O-])OCC[N+](C)(C)C)OC(=O)C	[M+H]	247.5	Lipids and lipid-like molecules	Glycerophospholipids	Glycerophosphocholines	20190304JAP_CCSdatabase_final.csv
Platelet-activating Factor	C26H54NO7P	108156	CCCCCCCCCCCCCCCCOC[C@H](COP(=O)([O-])OCC[N+](C)(C)C)OC(=O)C	[M-H]	230.8	Lipids and lipid-like molecules	Glycerophospholipids	Glycerophosphocholines	20190304JAP_CCSdatabase_final.csv
Secologanin	C17H24O10	161276	COC(=O)C1=CO[C@H]([C@@H]([C@@H]1CC=O)C=C)O[C@H]2[C@@H]([C@H]([C@@H]([C@H](O2)CO)O)O)O	[M-H]	190.9	Lipids and lipid-like molecules	Prenol lipids	Terpene glycosides	20190304JAP_CCSdatabase_final.csv
2-Hydroxy-4-(methylthio)butanoate	C5H10O3S	107344	CSCCC(C(=O)[O-])O.CSCCC(C(=O)[O-])O.[Ca+2]	[M-H]	167.3	Lipids and lipid-like molecules	Fatty acyls	Fatty acids and conjugates	20190304JAP_CCSdatabase_final.csv
alpha-Linolenic Acid (C18:3)	C18H30O2	[Compound(5280934)]	CC/C=C\C/C=C\C/C=C\CCCCCCCC(=O)O	[M-H]	174.88	Lipids and lipid-like molecules	Fatty acyls	Lineolic acids and derivatives	UnifiedCCSCompendium_20200812.csv
Palmitoleic Acid (C16:1)	C16H30O2	[Compound(445638)]	CCCCCC/C=C\CCCCCCCC(=O)O	[M-H]	167.95	Lipids and lipid-like molecules	Fatty acyls	Fatty acids and conjugates	UnifiedCCSCompendium_20200812.csv
Oleic Acid (C18:1)	C18H34O2	[Compound(445639)]	CCCCCCCC/C=C\CCCCCCCC(=O)O	[M-H]	176.46	Lipids and lipid-like molecules	Fatty acyls	Fatty acids and conjugates	UnifiedCCSCompendium_20200812.csv
11-Eicosenoic acid	C20H38O2	[Compound(5282768)]	CCCCCCCC/C=C\CCCCCCCCCC(=O)O	[M-H]	184.29	Lipids and lipid-like molecules	Fatty acyls	Fatty acids and conjugates	UnifiedCCSCompendium_20200812.csv
Pentadecanoic Acid (C15:0)	C15H30O2	[Compound(13849)]	CCCCCCCCCCCCCCC(=O)O	[M-H]	165.34	Lipids and lipid-like molecules	Fatty acyls	Fatty acids and conjugates	UnifiedCCSCompendium_20200812.csv
Heptadecanoic Acid (C17:0)	C17H34O2	[Compound(10465)]	CCCCCCCCCCCCCCCCC(=O)O	[M-H]	173.41	Lipids and lipid-like molecules	Fatty acyls	Fatty acids and conjugates	UnifiedCCSCompendium_20200812.csv
Stearic Acid (C18:0)	C18H36O2	[Compound(5281), Compound(139057051)]	CCCCCCCCCCCCCCCCCC(=O)O	[M-H]	177.66	Lipids and lipid-like molecules	Fatty acyls	Fatty acids and conjugates	UnifiedCCSCompendium_20200812.csv
Arachidic Acid (C20:0)	C20H40O2	[Compound(10467)]	CCCCCCCCCCCCCCCCCCCC(=O)O	[M-H]	186.17	Lipids and lipid-like molecules	Fatty acyls	Fatty acids and conjugates	UnifiedCCSCompendium_20200812.csv
Lignoceric Acid (C24:0)	C24H48O2	[Compound(11197)]	CCCCCCCCCCCCCCCCCCCCCCCC(=O)O	[M-H]	201.11	Lipids and lipid-like molecules	Fatty acyls	Fatty acids and conjugates	UnifiedCCSCompendium_20200812.csv
Rutin	C27H30O16	5280805	C[C@H]1[C@@H]([C@H]([C@H]([C@@H](O1)OC[C@@H]2[C@H]([C@@H]([C@H]([C@@H](O2)OC3=C(OC4=CC(=CC(=C4C3=O)O)O)C5=CC(=C(C=C5)O)O)O)O)O)O)O)O	[M-H]	234.7	Lipids and lipid-like molecules	Flavonoids	Flavonoid glycosides	20190304JAP_CCSdatabase_final.csv
14(S)-HDHA	C22H32O3	52921998	CC/C=C\C/C=C\C[C@@H](/C=C/C=C\C/C=C\C/C=C\CCC(=O)O)O	[M-H]-	190.2333333	Lipids and lipid-like molecules	Lipids		metabolitedata.csv
17(S)-HDHA	C22H32O3	11046191	CC/C=C\C[C@@H](/C=C/C=C\C/C=C\C/C=C\C/C=C\CCC(=O)O)O	[M-H]-	194.8417336	Lipids and lipid-like molecules	Lipids		metabolitedata.csv
8(9)-EET	C20H32O3	5283203	CCCCC/C=C\C/C=C\CC1C(O1)C/C=C\CCCC(=O)O	[M-H]-	184.6333333	Lipids and lipid-like molecules	Lipids		metabolitedata.csv
11(12)-EET	C20H32O3	5283204	CCCCC/C=C\CC1C(O1)C/C=C\C/C=C\CCCC(=O)O	[M-H]-	185	Lipids and lipid-like molecules	Lipids		metabolitedata.csv
Prostaglandin E2	C20H32O5	5280360	CCCCC[C@@H](/C=C/[C@H]1[C@@H](CC(=O)[C@@H]1C/C=C\CCCC(=O)O)O)O	[M-H]-	192.0601952	Lipids and lipid-like molecules	Lipids		metabolitedata.csv
13-HODE	C18H32O3	6443013	CCCCC[C@@H](/C=C/C=C\CCCCCCCC(=O)O)O	[M-H]-	183.1123551	Lipids and lipid-like molecules	Lipids		metabolitedata.csv
Thromboxane B2	C20H34O6	5942660	CCCCCC(/C=C/C1C(C(CC(O1)O)O)C/C=C/CCCC(=O)O)O	[M-H]-	194.4395835	Lipids and lipid-like molecules	Lipids		metabolitedata.csv
PC (16:1/16:1) (del9-cis)	C40H76NO8P	24778764	CCCCCC/C=C\CCCCCCCC(=O)OC[C@H](COP(=O)([O-])OCC[N+](C)(C)C)OC(=O)CCCCCCC/C=C\CCCCCC	[M+H]	280.1645842	Lipids and lipid-like molecules	Lipids		metabolitedata.csv
18:1 Lyso PC	C26H52NO7P	53480465	CCCCCC/C=C\CCCCCCCCCC(=O)OC[C@H](COP(=O)([O-])OCC[N+](C)(C)C)O	[M+H]	236.1	Lipids and lipid-like molecules			metabolitedata.csv
PG (18:1/18:1) (del9-trans)	C42H79O10P	9547127	CCCCCCCC/C=C/CCCCCCCC(=O)OC[C@H](COP(=O)(O)OC[C@H](CO)O)OC(=O)CCCCCCC/C=C/CCCCCCCC	[M+H]	294.8095511	Lipids and lipid-like molecules	Lipids		metabolitedata.csv
PE (18:1/18:1) (del9-trans)	C41H78NO8P	9546744	CCCCCCCC/C=C/CCCCCCCC(=O)OC[C@H](COP(=O)(O)OCCN)OC(=O)CCCCCCC/C=C/CCCCCCCC	[M+H]	284.0185229	Lipids and lipid-like molecules	Lipids		metabolitedata.csv
PC (18:1/18:1) (del9-cis)	C44H84NO8P	53478765	CCCCCCCC/C=C\CCCCCCCC(=O)OC[C@H](COP(=O)([O-])OCC[N+](C)(C)C)OC(=O)CCCCCCCCC/C=C\CCCCCC	[M+H]	296.4181516	Lipids and lipid-like molecules	Lipids		metabolitedata.csv
PE (18:1/18:1) (del9-cis)	C41H78NO8P	44251425	CCCCCCCC/C=C\CCCCCCCC(=O)OC[C@H](COP(=O)([O-])OCC[NH3+])OC(=O)CCCCCCC/C=C\CCCCCCCC	[M+H]	280.6	Lipids and lipid-like molecules	Lipids		metabolitedata.csv
PG (18:1/18:1) (del9-cis)	C42H79O10P	52927248	CCCCCCCC/C=C\CCCCCCCC(=O)OC[C@H](COP(=O)(O)OC[C@H](CO)O)OC(=O)CCCCCCC/C=C\CCCCCCCC	[M+H]	294.474426	Lipids and lipid-like molecules	Lipids		metabolitedata.csv
PC (11:0/11:0)	C30H60NO8P	10100010	CCCCCCCCCCC(=O)OCC(COP(=O)([O-])OCC[N+](C)(C)C)OC(=O)CCCCCCCCCC	[M+H]	257.0744648	Lipids and lipid-like molecules	Lipids		metabolitedata.csv
LPC 13:0	C21H44NO7P	24779450	CCCCCCCCCCCCC(=O)OC[C@H](COP(=O)([O-])OCC[N+](C)(C)C)O	[M+H]	220.7133914	Lipids and lipid-like molecules	Lipids		metabolitedata.csv
PG(17:0/17:0)	C40H79O10P	52927160	CCCCCCCCCCCCCCCCC(=O)OC[C@H](COP(=O)(O)OC[C@H](CO)O)OC(=O)CCCCCCCCCCCCCCCC	[M-H]-	277.4500709	Lipids and lipid-like molecules	Lipids		metabolitedata.csv
18:0 Lyso PC	C26H54NO7P	497299	CCCCCCCCCCCCCCCCCC(=O)OC[C@H](COP(=O)([O-])OCC[N+](C)(C)C)O	[M+H]	240.7	Lipids and lipid-like molecules			metabolitedata.csv
Glycolithocholic Acid (S)	C26H43NO7S	115245	C[C@H](CCC(=O)NCC(=O)O)[C@H]1CC[C@@H]2[C@@]1(CC[C@H]3[C@H]2CC[C@H]4[C@@]3(CC[C@H](C4)O)C)C	[M-H]-	218.9037158	Lipids and lipid-like molecules	Bile Acids		metabolitedata.csv
Taurocholic Acid (S)	C26H45NO10S2	14454428	C[C@H](CCC(=O)NCCS(=O)(=O)O)[C@H]1CC[C@@H]2[C@@]1([C@H](C[C@H]3[C@H]2[C@@H](C[C@H]4[C@@]3(CC[C@H](C4)OS(=O)(=O)O)C)O)O)C	[M-H]-	221.9868667	Lipids and lipid-like molecules	Bile Acids		metabolitedata.csv
Taurodeoxycholic Acid (S)	C26H45NO9S2	92042745	C[C@H](CCC(=O)NCCS(=O)(=O)O)[C@H]1CC[C@@H]2[C@@]1([C@H](C[C@H]3C2CC[C@H]4[C@@]3(CC[C@H](C4)O)C)O)C	[M-H]-	221.7857917	Lipids and lipid-like molecules	Bile Acids		metabolitedata.csv
Taurochenodeoxycholic Acid (S)	C26H45NO9S2	387316	C[C@H](CCC(=O)NCCS(=O)(=O)O)[C@H]1CC[C@@H]2[C@@]1(CC[C@H]3[C@H]2[C@@H](C[C@H]4[C@@]3(CC[C@H](C4)O)C)O)C	[M-H]-	221.7522792	Lipids and lipid-like molecules	Bile Acids		metabolitedata.csv
Cholic Acid (S)	C24H40O8S	459070	C[C@H](CCC(=O)O)[C@H]1CC[C@@H]2[C@@]1([C@H](C[C@H]3[C@H]2[C@@H](C[C@H]4[C@@]3(CC[C@H](C4)O)C)OS(=O)(=O)O)O)C	[M-H]-	211.0617885	Lipids and lipid-like molecules	Bile Acids		metabolitedata.csv
Chenodeoxycholic Acid (S)	C24H40O7S	21252312	C[C@H](CCC(=O)O)[C@H]1CC[C@@H]2[C@@]1(CC[C@H]3[C@H]2[C@@H](C[C@H]4[C@@]3(CC[C@H](C4)OS(=O)(=O)O)C)O)C	[M-H]-	206.5711121	Lipids and lipid-like molecules	Bile Acids		metabolitedata.csv
Ursodeoxycholic Acid (S)	C24H40O7S	31401	C[C@H](CCC(=O)O)[C@H]1CC[C@@H]2[C@@]1(CC[C@H]3[C@H]2[C@H](C[C@H]4[C@@]3(CC[C@H](C4)O)C)O)C	[M-H]-	208.9840128	Lipids and lipid-like molecules	Bile Acids		metabolitedata.csv
Sulfolithocholic Acid	C24H40O6S	451489	C[C@H](CCC(=O)O)[C@H]1CC[C@@H]2[C@@]1(CC[C@H]3[C@H]2CC[C@H]4[C@@]3(CC[C@H](C4)OS(=O)(=O)O)C)C	[M-H]-	212.2012138	Lipids and lipid-like molecules	Bile Acids		metabolitedata.csv
2'-Deoxyguanosine 5'-Monophosphate	C10H14N5O7P	65059	C1[C@@H]([C@H](O[C@H]1N2C=NC3=C2NC(=NC3=O)N)COP(=O)(O)O)O	[M+H]	178.9568038	Organoheterocyclic compounds	Nucleotides		metabolitedata.csv
ÃÂÃÂ-3 Arachidonic Acid	C20H32O2	11722594	CC/C=C\C/C=C\C/C=C\C/C=C\CCCCCCC(=O)O	[M+H]	178.6	Lipids and lipid-like molecules			metabolitedata.csv
7R Maresin-1	C22H32O4	60201795	CC/C=C\C/C=C\C[C@@H](/C=C\C=C\C=C\[C@@H](C/C=C\CCC(=O)O)O)O	[M-H]-	193.5333333	Lipids and lipid-like molecules			metabolitedata.csv
7S Maresin-1	C22H32O4	90000878	CC/C=C\C/C=C\C[C@H](/C=C\C=C/C=C/[C@H](C/C=C\CCC(=O)O)O)O	[M-H]-	193.5	Lipids and lipid-like molecules			metabolitedata.csv
Resolvin D1	C22H32O5	44251266	CC/C=C\C[C@@H](/C=C/C=C\C=C\C=C\[C@H]([C@H](C/C=C\CCC(=O)O)O)O)O	[M-H]-	198.8333333	Lipids and lipid-like molecules			metabolitedata.csv
Resolvin D2	C22H32O5	11383310	CC/C=C\C[C@@H]([C@@H](/C=C/C=C/C=C\C=C\[C@H](C/C=C\CCC(=O)O)O)O)O	[M-H]-	194.9	Lipids and lipid-like molecules			metabolitedata.csv
9-OxoODE	C18H30O3	9839084	CCCCC/C=C\C=C\C(=O)CCCCCCCC(=O)O	[M+H]	184.2	Lipids and lipid-like molecules			metabolitedata.csv
Prostaglandin I2	C20H31O5	5280427	CCCCC[C@@H](/C=C/[C@H]1[C@@H](C[C@H]2[C@@H]1CC(=CCCCC(=O)O)O2)O)O	[M+H]	201.3	Lipids and lipid-like molecules			metabolitedata.csv
ÃÂÃÂ³- + ÃÂÃÂ²-Tocopherol	C28H48O2	14986	CC1=C(C=C2CCC(OC2=C1C)(C)CCCC(C)CCCC(C)CCCC(C)C)O	[M+H]	212.2347263	Lipids and lipid-like molecules	Vitamins		metabolitedata.csv
2,1-Hydroxypregnenolone	C21H32O3	247020	C[C@]12CC[C@H]3[C@H]([C@@H]1CC[C@@H]2C(=O)CO)CC=C4[C@@]3(CC[C@@H](C4)O)C	[M+H]	190.5186198	Lipids and lipid-like molecules	Steroids		metabolitedata.csv
Testosterone	C19H28O2	5408	CC12CCC3C(C1CCC2O)CCC4=CC(=O)CCC34C	[M+H]	183.8161178	Lipids and lipid-like molecules	Steroids		metabolitedata.csv
L-Carnitine	C7H15NO3	5970	C[N+](C)(C)CC(CC(=O)O)O.[Cl-]	[M+H]	132.9	Organic acids and derivatives	Organonitrogen compounds	Quaternary ammonium salts	20190304JAP_CCSdatabase_final.csv
Mono(2-ethyl-5-carboxypentyl) adipate	C14H24O6	155898863	CCC(CCCC(=O)O)COC(=O)CCCCC(=O)O	[M-H]-	167.03	Organic acids and derivatives			UACCSCEC_ac1c00142_si_002_TS-5.csv
sn-Glycero-3-phosphocholine	C8H20NO6P	439285	C[N+](C)(C)CCOP(=O)(O)OC[C@@H](CO)O	[M+H]	157.1666667	Lipids and lipid-like molecules	Lipids		metabolitedata.csv
DG (12:0/12:0)	C27H52O5	151838	CCCCCCCCCCCC(=O)OC[C@H](CO)OC(=O)CCCCCCCCCCC	[M-H]-	211.7990637	Lipids and lipid-like molecules	Lipids		metabolitedata.csv
LPS (16:0/0:0)	C22H44NPO9	9547100	CCCCCCCCCCCCCCCC(=O)OC[C@H](COP(=O)(O)OC[C@@H](C(=O)O)N)O	[M+H]	222.791167	Lipids and lipid-like molecules	Lipids		metabolitedata.csv
Lyso PC(P-18:0)	C26H54NO6P	24779527	CCCCCCCCCCCCCCCC/C=C\OC[C@H](COP(=O)([O-])OCC[N+](C)(C)C)O	[M+H]	236.8	Lipids and lipid-like molecules			metabolitedata.csv
SM (d18:1/17:0)	C40H81N2O6P	46891763	CCCCCCCCCCCCCCCCC(=O)N[C@@H](COP(=O)([O-])OCC[N+](C)(C)C)[C@@H](/C=C/CCCCCCCCCCCCC)O	[M+H]	290.1177997	Lipids and lipid-like molecules	Lipids		metabolitedata.csv
Diisobutyl adipate	C14H26O4	8831	CC(C)COC(=O)CCCCC(=O)OCC(C)C	[M+H]+	167.82	Lipids and lipid-like molecules			UACCSCEC_ac1c00142_si_002_TS-5.csv
Glycochenodeoxycholic Acid (S)	C26H43NO8S	11954205	C[C@H](CCC(=O)NCC(=O)O)[C@H]1CC[C@@H]2[C@@]1(CC[C@H]3[C@H]2[C@@H](C[C@H]4[C@@]3(CC[C@H](C4)O)C)OS(=O)(=O)O)C	[M-H]-	218.8031783	Lipids and lipid-like molecules	Bile Acids		metabolitedata.csv
Cyclohexane-1,2-dicarboxylic mono carboxyisooctyl ester	C17H28O6	155898864	CC(CCCOC(=O)[C@@H]1CCCC[C@@H]1C(=O)O)CCCC(=O)O	[M-H]-	176.73	Lipids and lipid-like molecules			UACCSCEC_ac1c00142_si_002_TS-5.csv
Cyclohexane-1,2-dicarboxylic mono hydroxyisononyl ester	C17H30O5	155898868	CC(O)CCC(C)CCCOC(=O)[C@@H]1CCCC[C@@H]1C(=O)O	[M-H]-	175.32	Lipids and lipid-like molecules			UACCSCEC_ac1c00142_si_002_TS-5.csv
Mono-isononyl-cyclohexane-1,2-dicarboxylate	C17H30O4	155898865	CCCCC(C)CCCOC(=O)[C@@H]1CCCC[C@@H]1C(=O)O	[M-H]-	175.48	Lipids and lipid-like molecules			UACCSCEC_ac1c00142_si_002_TS-5.csv
Diisononyl hexahydrophthalate	C26H48O4	11524680	CC(C)CCCCCCOC(=O)C1CCCCC1C(=O)OCCCCCCC(C)C	[M+H]+	224.82	Lipids and lipid-like molecules			UACCSCEC_ac1c00142_si_002_TS-5.csv
Antiblaze V6	C13H24Cl6O8P2	92310	C(CCl)OP(=O)(OCCCl)OCC(COP(=O)(OCCCl)OCCCl)(CCl)CCl	[M+H]+	211.37	Lipids and lipid-like molecules			UACCSCEC_ac1c00142_si_002_TS-5.csv
Tetraheptylammonium	C28H60N	78073	CCCCCCC[N+](CCCCCCC)(CCCCCCC)CCCCCCC.[Br-]	[M*]	233.9	Lipids and lipid-like molecules	Organonitrogen compounds	Quaternary ammonium salts	20190304JAP_CCSdatabase_final.csv
Tetraoctylammonium	C32H68N	2734117	CCCCCCCC[N+](CCCCCCCC)(CCCCCCCC)CCCCCCCC.[Br-]	[M*]	254.8	Lipids and lipid-like molecules	Organonitrogen compounds	Quaternary ammonium salts	20190304JAP_CCSdatabase_final.csv
Tetradecylammonium	C40H84N	3014876	CCCCCCCCCC[N+](CCCCCCCCCC)(CCCCCCCCCC)CCCCCCCCCC.[Br-]	[M*]	290.5	Lipids and lipid-like molecules	Organonitrogen compounds	Quaternary ammonium salts	20190304JAP_CCSdatabase_final.csv
Tetradodecylammonium	C48H100N	3014871	CCCCCCCCCCCC[N+](CCCCCCCCCCCC)(CCCCCCCCCCCC)CCCCCCCCCCCC.[Br-]	[M*]	316.9	Lipids and lipid-like molecules	Organonitrogen compounds	Quaternary ammonium salts	20190304JAP_CCSdatabase_final.csv
Tetrahexadecylammonium	C64H132N	12073128	CCCCCCCCCCCCCCCC[N+](CCCCCCCCCCCCCCCC)(CCCCCCCCCCCCCCCC)CCCCCCCCCCCCCCCC.[Br-]	[M*]	353.8	Lipids and lipid-like molecules	Organonitrogen compounds	Quaternary ammonium salts	20190304JAP_CCSdatabase_final.csv
Tetraoctadecylammonium	C72H148N	3017419	CCCCCCCCCCCCCCCCCC[N+](CCCCCCCCCCCCCCCCCC)(CCCCCCCCCCCCCCCCCC)CCCCCCCCCCCCCCCCCC.[Br-]	[M*]	372.9	Lipids and lipid-like molecules	Organonitrogen compounds	Quaternary ammonium salts	20190304JAP_CCSdatabase_final.csv
Tributylammonium	C12H28N	14842790	CCCCN(CCCC)CCCC.CCCCN(CCCC)CCCC.CCCCN(CCCC)CCCC.CCCCN(CCCC)CCCC.OP(=O)(O)OP(=O)(O)O	[M+H]	150.4	Lipids and lipid-like molecules	Organonitrogen compounds	Amines	20190304JAP_CCSdatabase_final.csv
Naproxen	C14H14O3	156391	C[C@@H](C1=CC2=C(C=C1)C=C(C=C2)OC)C(=O)O	[M+H]	153.9	Benzenoids	Naphthalenes		20190304JAP_CCSdatabase_final.csv
Indaziflam	C16H20FN5	44146693	C[C@H]1CC2=C([C@@H]1NC3=NC(=NC(=N3)N)C(C)F)C=C(C=C2)C	[M-H]	180	Benzenoids	Indanes		20190304JAP_CCSdatabase_final.csv
6-Hydroxydopamine	C8H11NO3	160157	C1=C(C(=CC(=C1O)O)O)CCN.Cl	[M+H]	143.2	Benzenoids	Phenols	Benzenediols	20190304JAP_CCSdatabase_final.csv
4-Hydroxy-2',3,3',4',5,5'-hexachlorobiphenyl	C12H4Cl6O	178005	C1=C(C=C(C(=C1Cl)O)Cl)C2=CC(=C(C(=C2Cl)Cl)Cl)Cl	[M-H]	174.7	Benzenoids	Benzene and substituted derivatives	Biphenyls and derivatives	20190304JAP_CCSdatabase_final.csv
3-Hydroxyanthranilate	C7H7NO3	86	C1=CC(=C(C(=C1)O)N)C(=O)O	[M-H]	128.4	Benzenoids	Benzene and substituted derivatives	Benzoic acids and derivatives	20190304JAP_CCSdatabase_final.csv
2,3-Dihydroxybenzoate	C7H6O4	19	C1=CC(=C(C(=C1)O)O)C(=O)O	[M-H]	120.9	Benzenoids	Benzene and substituted derivatives	Benzoic acids and derivatives	20190304JAP_CCSdatabase_final.csv
4-Hydroxy-2',3,3',5,5',6'-hexachlorobiphenyl	C12H4Cl6O	178004	C1=CC(=C(C(=C1C2=CC(=C(C(=C2Cl)Cl)O)Cl)Cl)Cl)Cl	[M-H]	175.1	Benzenoids	Benzene and substituted derivatives	Biphenyls and derivatives	20190304JAP_CCSdatabase_final.csv
Noradrenaline	C8H11NO3	439260	C1=CC(=C(C=C1[C@H](CN)O)O)O	[M-H]	134.4	Benzenoids	Phenols	Benzenediols	20190304JAP_CCSdatabase_final.csv
6-Hydroxy-2,2',4,4'-tetrabromodiphenylether	C12H6Br4O2	3086109	C1=CC(=C(C=C1Br)Br)OC2=C(C=C(C=C2Br)Br)O	[M-H]	174.9	Benzenoids	Benzene and substituted derivatives	Biphenyls and derivatives	20190304JAP_CCSdatabase_final.csv
3-Amino-4-Hydroxybenzoate	C7H7NO3	65083	C1=CC(=C(C=C1C(=O)O)N)O	[M-H]	126.1	Benzenoids	Benzene and substituted derivatives	Benzoic acids and derivatives	20190304JAP_CCSdatabase_final.csv
3,4-Dihydroxybenzoate	C7H6O4	72	C1=CC(=C(C=C1C(=O)O)O)O	[M-H]	122.9	Benzenoids	Benzene and substituted derivatives	Benzoic acids and derivatives	20190304JAP_CCSdatabase_final.csv
3,4-Dihydroxymandelate	C8H8O5	85782	C1=CC(=C(C=C1C(C(=O)O)O)O)O	[M-H]	137.7	Benzenoids	Phenols	Benzenediols	20190304JAP_CCSdatabase_final.csv
4-Hydroxy-2',3,3',4',5'-pentachlorobiphenyl	C12H5Cl5O	644180	C1=CC(=C(C=C1C2=CC(=C(C(=C2Cl)Cl)Cl)Cl)Cl)O	[M-H]	169.4	Benzenoids	Benzene and substituted derivatives	Biphenyls and derivatives	20190304JAP_CCSdatabase_final.csv
Dopamine	C8H11NO2	681	C1=CC(=C(C=C1CCN)O)O	[M-H]	133.3	Benzenoids	Phenols	Benzenediols	20190304JAP_CCSdatabase_final.csv
2-Hydroxy-2',3',4',5,5'-pentachlorobiphenyl	C12H5Cl5O	119518	C1=CC(=C(C=C1Cl)C2=CC(=C(C(=C2Cl)Cl)Cl)Cl)O	[M-H]	166.3	Benzenoids	Benzene and substituted derivatives	Biphenyls and derivatives	20190304JAP_CCSdatabase_final.csv
2,5-Dihydrobenzoate	C7H6O4	3469	C1=CC(=C(C=C1O)C(=O)O)O	[M-H]	125	Benzenoids	Benzene and substituted derivatives	Benzoic acids and derivatives	20190304JAP_CCSdatabase_final.csv
Homogentisate	C8H8O4	780	C1=CC(=C(C=C1O)CC(=O)O)O	[M-H]	132.7	Benzenoids	Benzene and substituted derivatives	Phenylacetic acids	20190304JAP_CCSdatabase_final.csv
4-Hydroxy-2,2',4',6'-tetrachlorobiphenyl	C12H6Cl4O	153963	C1=CC(=C(C=C1O)Cl)C2=C(C=C(C=C2Cl)Cl)Cl	[M-H]	162.7	Benzenoids	Benzene and substituted derivatives	Biphenyls and derivatives	20190304JAP_CCSdatabase_final.csv
4-Hydroxy-2,2',5'-trichlorobiphenyl	C12H7Cl3O	119106	C1=CC(=C(C=C1O)Cl)C2=C(C=CC(=C2)Cl)Cl	[M-H]	158.4	Benzenoids	Benzene and substituted derivatives	Biphenyls and derivatives	20190304JAP_CCSdatabase_final.csv
3-Hydroxy-2',5'-dichlorobiphenyl	C12H8Cl2O	92346	C1=CC(=CC(=C1)O)C2=C(C=CC(=C2)Cl)Cl	[M-H]	154.9	Benzenoids	Benzene and substituted derivatives	Biphenyls and derivatives	20190304JAP_CCSdatabase_final.csv
3-Hydroxybenzyl Alcohol	C7H8O2	102	C1=CC(=CC(=C1)O)CO	[M-H]	123	Benzenoids	Benzene and substituted derivatives	Benzyl alcohols	20190304JAP_CCSdatabase_final.csv
4-Aminobenzoate	C7H7NO2	978	C1=CC(=CC=C1C(=O)O)N	[M+H]	127.3	Benzenoids	Benzene and substituted derivatives	Benzoic acids and derivatives	20190304JAP_CCSdatabase_final.csv
4-Hydroxybenzoate	C7H6O3	135	C1=CC(=CC=C1C(=O)O)O	[M-H]	121.6	Benzenoids	Benzene and substituted derivatives	Benzoic acids and derivatives	20190304JAP_CCSdatabase_final.csv
4-Hydroxy-2',3',5',6'-tetrachlorobiphenyl	C12H6Cl4O	181087	C1=CC(=CC=C1C2=C(C(=CC(=C2Cl)Cl)Cl)Cl)O	[M-H]	163.4	Benzenoids	Benzene and substituted derivatives	Biphenyls and derivatives	20190304JAP_CCSdatabase_final.csv
4-Hydroxy-2',4',6'-trichlorobiphenyl	C12H7Cl3O	105036	C1=CC(=CC=C1C2=C(C=C(C=C2Cl)Cl)Cl)O	[M-H]	159.3	Benzenoids	Benzene and substituted derivatives	Biphenyls and derivatives	20190304JAP_CCSdatabase_final.csv
4-Hydroxy-2',5'-dichlorobiphenyl	C12H8Cl2O	91653	C1=CC(=CC=C1C2=C(C=CC(=C2)Cl)Cl)O	[M-H]	152.6	Benzenoids	Benzene and substituted derivatives	Biphenyls and derivatives	20190304JAP_CCSdatabase_final.csv
4-Hydroxy-2',3',4',5'-tetrachlorobiphenyl	C12H6Cl4O	105101	C1=CC(=CC=C1C2=CC(=C(C(=C2Cl)Cl)Cl)Cl)O	[M-H]	163.1	Benzenoids	Benzene and substituted derivatives	Biphenyls and derivatives	20190304JAP_CCSdatabase_final.csv
Amentoflavone	C30H18O10	5281600	C1=CC(=CC=C1C2=CC(=O)C3=C(O2)C(=C(C=C3O)O)C4=C(C=CC(=C4)C5=CC(=O)C6=C(C=C(C=C6O5)O)O)O)O	[M-H]	216.5	Benzenoids	Benzene and substituted derivatives	Phenylpyruvic acid derivatives	20190304JAP_CCSdatabase_final.csv
4-Hydroxy-4'-chlorobiphenyl	C12H9ClO	91589	C1=CC(=CC=C1C2=CC=C(C=C2)Cl)O	[M-H]	147.8	Benzenoids	Benzene and substituted derivatives	Biphenyls and derivatives	20190304JAP_CCSdatabase_final.csv
4-Hydroxyphenylpyruvic Acid	C9H8O4	979	C1=CC(=CC=C1CC(=O)C(=O)O)O	[M-H]	147.1	Benzenoids	Benzene and substituted derivatives	Phenylpyruvic acid derivatives	20190304JAP_CCSdatabase_final.csv
4-Hydroxyphenylacetic Acid	C8H8O3	127	C1=CC(=CC=C1CC(=O)O)O	[M-H]	128.9	Benzenoids	Phenols	1-hydroxy-2-unsubstituted benzenoids	20190304JAP_CCSdatabase_final.csv
Tyramine	C8H11NO	5610	C1=CC(=CC=C1CCN)O	[M+H]	122.6	Benzenoids	Benzene and substituted derivatives	Phenethylamines	20190304JAP_CCSdatabase_final.csv
Tyrosol	C8H10O2	10393	C1=CC(=CC=C1CCO)O	[M-H]	138.2	Benzenoids	Phenols	Tyrosols and derivatives	20190304JAP_CCSdatabase_final.csv
Sulfanilamide	C6H8N2O2S	5333	C1=CC(=CC=C1N)S(=O)(=O)N	[M-H]	141.2	Benzenoids	Benzene and substituted derivatives	Benzenesulfonamides	20190304JAP_CCSdatabase_final.csv
Sulfaguanidine	C7H10N4O2S	5324	C1=CC(=CC=C1N)S(=O)(=O)N=C(N)N	[M-H]	146.6	Benzenoids	Benzene and substituted derivatives	Benzenesulfonamides	20190304JAP_CCSdatabase_final.csv
Hydroquinone	C6H6O2	785	C1=CC(=CC=C1O)O	[M-H]	118.7	Benzenoids	Phenols	Benzenediols	20190304JAP_CCSdatabase_final.csv
Sodium Salicylate	C7H6O3	5900	C1=CC=C(C(=C1)C(=O)[O-])O.[Na+]	[M-H]	122.9	Benzenoids	Benzene and substituted derivatives	Benzoic acids and derivatives	20190304JAP_CCSdatabase_final.csv
Salicylamide	C7H7NO2	5147	C1=CC=C(C(=C1)C(=O)N)O	[M-H]	121.5	Benzenoids	Phenols	1-hydroxy-4-unsubstituted benzenoids	20190304JAP_CCSdatabase_final.csv
2-Hydroxy Hippuric Acid	C9H9NO4	10253	C1=CC=C(C(=C1)C(=O)NCC(=O)O)O	[M-H]	137.5	Benzenoids	Benzene and substituted derivatives	Benzoic acids and derivatives	20190304JAP_CCSdatabase_final.csv
Anthranilate	C7H7NO2	227	C1=CC=C(C(=C1)C(=O)O)N	[M-H]	126.1	Benzenoids	Benzene and substituted derivatives	Benzoic acids and derivatives	20190304JAP_CCSdatabase_final.csv
Salicylate	C7H6O3	338	C1=CC=C(C(=C1)C(=O)O)O	[M-H]	120.2	Benzenoids	Benzene and substituted derivatives	Benzoic acids and derivatives	20190304JAP_CCSdatabase_final.csv
2-Hydroxy-2',5'-dichlorobiphenyl	C12H8Cl2O	92347	C1=CC=C(C(=C1)C2=C(C=CC(=C2)Cl)Cl)O	[M-H]	151.1	Benzenoids	Benzene and substituted derivatives	Biphenyls and derivatives	20190304JAP_CCSdatabase_final.csv
2-Hydroxyphenylacetate	C8H8O3	11970	C1=CC=C(C(=C1)CC(=O)O)O	[M-H]	130.7	Benzenoids	Benzene and substituted derivatives	Phenylacetic acids	20190304JAP_CCSdatabase_final.csv
1,2-Phenylenediamine	C6H8N2	7243	C1=CC=C(C(=C1)N)N	[M+H]	129.1	Benzenoids	Benzene and substituted derivatives	Aniline and substituted derivates	20190304JAP_CCSdatabase_final.csv
2-Aminophenol	C6H7NO	5801	C1=CC=C(C(=C1)N)O	[M-H]	118.3	Benzenoids	Benzene and substituted derivatives	Aniline and substituted anilines	20190304JAP_CCSdatabase_final.csv
Aniline-2-sulfonate	C6H7NO3S	6926	C1=CC=C(C(=C1)N)S(=O)(=O)O	[M-H]	131.9	Benzenoids	Benzene and substituted derivatives	Benzenesulfonic acids and derivatives	20190304JAP_CCSdatabase_final.csv
Pyrocatechol	C6H6O2	289	C1=CC=C(C(=C1)O)O	[M-H]	115.1	Benzenoids	Phenols	Benzenediols	20190304JAP_CCSdatabase_final.csv
Mandelate	C8H8O3	439616	C1=CC=C(C=C1)[C@@H](C(=O)O)O	[M-H]	130.6	Benzenoids	Benzene and substituted derivatives		20190304JAP_CCSdatabase_final.csv
Sodium Hippurate Hydrate	C9H9NO3	10773	C1=CC=C(C=C1)C(=O)NCC(=O)[O-].[Na+]	[M-H]	147.7	Benzenoids	Benzene and substituted derivatives	Benzoic acids and derivatives	20190304JAP_CCSdatabase_final.csv
Hippurate	C9H9NO3	464	C1=CC=C(C=C1)C(=O)NCC(=O)O	[M-H]	142.4	Benzenoids	Benzene and substituted derivatives	Benzoic acids and derivatives	20190304JAP_CCSdatabase_final.csv
4-Hydroxy-2-chlorobiphenyl	C12H9ClO	79688	C1=CC=C(C=C1)C2=C(C=C(C=C2)O)Cl	[M-H]	147	Benzenoids	Benzene and substituted derivatives	Biphenyls and derivatives	20190304JAP_CCSdatabase_final.csv
2-Hydroxy-5-chlorobiphenyl	C12H9ClO	11827	C1=CC=C(C=C1)C2=C(C=CC(=C2)Cl)O	[M-H]	143.5	Benzenoids	Benzene and substituted derivatives	Biphenyls and derivatives	20190304JAP_CCSdatabase_final.csv
4-Hydroxy-3,5-dichlorobiphenyl	C12H8Cl2O	70820	C1=CC=C(C=C1)C2=CC(=C(C(=C2)Cl)O)Cl	[M-H]	150.9	Benzenoids	Benzene and substituted derivatives	Biphenyls and derivatives	20190304JAP_CCSdatabase_final.csv
4-Hydroxy-3-chlorobiphenyl	C12H9ClO	7074	C1=CC=C(C=C1)C2=CC(=C(C=C2)O)Cl	[M-H]	146	Benzenoids	Benzene and substituted derivatives	Biphenyls and derivatives	20190304JAP_CCSdatabase_final.csv
12-Hydroxybenzo(a)pyrene	C20H12O	42030	C1=CC=C2C(=C1)C=C3C=CC4=C5C3=C2C=C(C5=CC=C4)O	[M-H]	162.5	Benzenoids	Pyrenes	Benzopyrenes	20190304JAP_CCSdatabase_final.csv
6-Hydroxychrysene	C18H12O	37766	C1=CC=C2C(=C1)C=CC3=C2C=C(C4=CC=CC=C34)O	[M-H]	157.3	Benzenoids	Phenanthrenes and derivatives	Chrysenes	20190304JAP_CCSdatabase_final.csv
Benz(j)aceanthrylene	C20H12	104987	C1=CC=C2C(=C1)C=CC3=C2C=C4C=CC=C5C4=C3C=C5	[M*]	150.9	Benzenoids	Pyrenes	Benzopyrenes	20190304JAP_CCSdatabase_final.csv
Chrysene	C18H12	9171	C1=CC=C2C(=C1)C=CC3=C2C=CC4=CC=CC=C43	[M*]	144.9	Benzenoids	Phenanthrenes and derivatives		20190304JAP_CCSdatabase_final.csv
Phenanthrene	C14H10	995	C1=CC=C2C(=C1)C=CC3=CC=CC=C32	[M*]	131.2	Benzenoids	Phenanthrenes and derivatives		20190304JAP_CCSdatabase_final.csv
Triphenylene	C18H12	9170	C1=CC=C2C(=C1)C3=CC=CC=C3C4=CC=CC=C24	[M*]	143.6	Benzenoids	Phenanthrenes and derivatives		20190304JAP_CCSdatabase_final.csv
Benzanthrone	C17H10O	6697	C1=CC=C2C(=C1)C3=CC=CC4=C3C(=CC=C4)C2=O	[M*]	142.9	Benzenoids	Anthracenes		20190304JAP_CCSdatabase_final.csv
Fluoranthene	C16H10	9154	C1=CC=C2C(=C1)C3=CC=CC4=C3C2=CC=C4	[M*]	136.7	Benzenoids	Naphthalenes		20190304JAP_CCSdatabase_final.csv
2,3-dihydroxynaphthalene	C10H8O2	7091	C1=CC=C2C=C(C(=CC2=C1)O)O	[M-H]	131.3	Benzenoids	Naphthalenes	Naphthols and derivatives	20190304JAP_CCSdatabase_final.csv
Anthracene	C14H10	8418	C1=CC=C2C=C3C=CC=CC3=CC2=C1	[M*]	132.3	Benzenoids	Anthracenes		20190304JAP_CCSdatabase_final.csv
Benzo(k)fluoranthene	C20H12	9158	C1=CC=C2C=C3C4=CC=CC5=C4C(=CC=C5)C3=CC2=C1	[M*]	151.2	Benzenoids	Pyrenes	Benzopyrenes	20190304JAP_CCSdatabase_final.csv
Naphthalene	C10H8	931	C1=CC=C2C=CC=CC2=C1	[M+H]	119.2	Benzenoids	Naphthalenes		20190304JAP_CCSdatabase_final.csv
Benzo(b)fluoranthene	C20H12	9153	C1=CC=C2C3=C4C(=CC=C3)C5=CC=CC=C5C4=CC2=C1	[M*]	150.2	Benzenoids	Pyrenes	Benzopyrenes	20190304JAP_CCSdatabase_final.csv
Benzo(a)pyrene	C20H12	2336	C1=CC=C2C3=C4C(=CC2=C1)C=CC5=C4C(=CC=C5)C=C3	[M*]	149.5	Benzenoids	Pyrenes	Benzopyrenes	20190304JAP_CCSdatabase_final.csv
Dibenzo(a,h)pyrene	C24H14	9108	C1=CC=C2C3=C4C(=CC2=C1)C=CC5=C4C(=CC6=CC=CC=C56)C=C3	[M+H]	164.6	Benzenoids	Pyrenes	Benzopyrenes	20190304JAP_CCSdatabase_final.csv
Juglone	C10H6O3	3806	C1=CC2=C(C(=O)C=CC2=O)C(=C1)O	[M-H]	130.8	Benzenoids	Naphthalenes	Naphthoquinones	20190304JAP_CCSdatabase_final.csv
2,6-Dihydroxynaphthalene	C10H8O2	93552	C1=CC2=C(C=CC(=C2)O)C=C1O	[M-H]	137	Benzenoids	Naphthalenes	Naphthols and derivatives	20190304JAP_CCSdatabase_final.csv
1,5-Dihydroxynaphthalene	C10H8O2	6749	C1=CC2=C(C=CC=C2O)C(=C1)O	[M-H]	133.2	Benzenoids	Naphthalenes	Naphthols and derivatives	20190304JAP_CCSdatabase_final.csv
Acenaphthenequinone	C12H6O2	6724	C1=CC2=C3C(=C1)C(=O)C(=O)C3=CC=C2	[M+H]	143.8	Benzenoids	Naphthalenes		20190304JAP_CCSdatabase_final.csv
Pyrene-4,5-dione	C16H8O2	160814	C1=CC2=C3C(=C1)C(=O)C(=O)C4=CC=CC(=C43)C=C2	[M+H]	142.6	Benzenoids	Pyrenes		20190304JAP_CCSdatabase_final.csv
Perinaphthenon	C13H8O	11050	C1=CC2=C3C(=C1)C=CC(=O)C3=CC=C2	[M+H]	133	Benzenoids	Naphthalenes	Phenylnaphthalenes	20190304JAP_CCSdatabase_final.csv
Acenaphthylene	C12H8	9161	C1=CC2=C3C(=C1)C=CC3=CC=C2	[M*]	123.3	Benzenoids	Naphthalenes		20190304JAP_CCSdatabase_final.csv
1-Hydroxypyrene	C16H10O	21387	C1=CC2=C3C(=C1)C=CC4=C(C=CC(=C43)C=C2)O	[M-H]	148	Benzenoids	Phenanthrenes and derivatives	Phenanthrols	20190304JAP_CCSdatabase_final.csv
7-hydroxybenzo(a)pyrene	C20H12O	37880	C1=CC2=C3C(=C1)C=CC4=C3C(=CC5=C4C=CC=C5O)C=C2	[M-H]	162.6	Benzenoids	Pyrenes	Benzopyrenes	20190304JAP_CCSdatabase_final.csv
Pyrene	C16H10	31423	C1=CC2=C3C(=C1)C=CC4=CC=CC(=C43)C=C2	[M*]	136.1	Benzenoids	Pyrenes		20190304JAP_CCSdatabase_final.csv
Perylene	C20H12	9142	C1=CC2=C3C(=C1)C4=CC=CC5=C4C(=CC=C5)C3=CC=C2	[M*]	149.6	Benzenoids	Phenanthrenes and derivatives		20190304JAP_CCSdatabase_final.csv
Benzo(g,h,i)perylene	C22H12	9117	C1=CC2=C3C(=C1)C4=CC=CC5=C4C6=C(C=C5)C=CC(=C36)C=C2	[M*]	154	Benzenoids	Pyrenes	Benzopyrenes	20190304JAP_CCSdatabase_final.csv
Coronene	C24H12	9115	C1=CC2=C3C4=C1C=CC5=C4C6=C(C=C5)C=CC7=C6C3=C(C=C2)C=C7	[M*]	159.9	Benzenoids	Pyrenes	Benzopyrenes	20190304JAP_CCSdatabase_final.csv
Fluorene	C13H10	6853	C1C2=CC=CC=C2C3=CC=CC=C31	[M*]	130.1	Benzenoids	Fluorenes		20190304JAP_CCSdatabase_final.csv
Acenaphthene	C12H10	6734	C1CC2=CC=CC3=C2C1=CC=C3	[M*]	127.7	Benzenoids	Naphthalenes		20190304JAP_CCSdatabase_final.csv
Acetaminophen	C8H9NO2	1983	CC(=O)NC1=CC=C(C=C1)O	[M-H]	132.7	Benzenoids	Phenols	1-hydroxy-2-unsubstituted benzenoids	20190304JAP_CCSdatabase_final.csv
Resorcinol Monoacetate	C8H8O3	5055	CC(=O)OC1=CC=CC(=C1)O	[M-H]	126.5	Benzenoids	Phenols	Benzenediols	20190304JAP_CCSdatabase_final.csv
Terfenadine	C32H41NO2	5405	CC(C)(C)C1=CC=C(C=C1)C(CCCN2CCC(CC2)C(C3=CC=CC=C3)(C4=CC=CC=C4)O)O	[M+H]	226.3	Benzenoids	Benzene and substituted derivatives	Diphenylmethanes	20190304JAP_CCSdatabase_final.csv
Verapamil	C27H38N2O4	2520	CC(C)C(CCCN(C)CCC1=CC(=C(C=C1)OC)OC)(C#N)C2=CC(=C(C=C2)OC)OC	[M+H]	203.4	Benzenoids	Benzene and substituted derivatives	Phenylbutylamines	20190304JAP_CCSdatabase_final.csv
9-Methylanthracene	C15H12	13068	CC1=C2C=CC=CC2=CC3=CC=CC=C13	[M*]	134.8	Benzenoids	Phenanthrenes and derivatives		20190304JAP_CCSdatabase_final.csv
4-Methylcatechol	C7H8O2	9958	CC1=CC(=C(C=C1)O)O	[M-H]	121.5	Benzenoids	Phenols	Benzenediols	20190304JAP_CCSdatabase_final.csv
Sulfisomidine	C12H14N4O2S	5343	CC1=CC(=NC(=N1)C)NS(=O)(=O)C2=CC=C(C=C2)N	[M-H]	170	Benzenoids	Benzene and substituted derivatives	Benzenesulfonamides	20190304JAP_CCSdatabase_final.csv
Sulfamethazine	C12H14N4O2S	5327	CC1=CC(=NC(=N1)NS(=O)(=O)C2=CC=C(C=C2)N)C	[M-H]	168.1	Benzenoids	Benzene and substituted derivatives	Benzenesulfonamides	20190304JAP_CCSdatabase_final.csv
N-Acetyl-sulfamethoxazole	C12H13N3O4S	65280	CC1=CC(=NO1)NS(=O)(=O)C2=CC=C(C=C2)NC(=O)C	[M-H]	171.5	Benzenoids	Benzene and substituted derivatives	Benzenesulfonamides	20190304JAP_CCSdatabase_final.csv
1,2-Dimethylnaphthalene	C12H12	11304	CC1=CC=C(C2=CC=CC=C12)C	[M*]	126.9	Benzenoids	Naphthalenes		20190304JAP_CCSdatabase_final.csv
2-Methylhippuric Acid	C10H11NO3	91637	CC1=CC=CC=C1C(=O)NCC(=O)O	[M-H]	153.1	Benzenoids	Benzene and substituted derivatives	Benzoic acids and derivatives	20190304JAP_CCSdatabase_final.csv
1-Methylnaphthalene	C11H10	7002	CC1=CC=CC2=CC=CC=C12	[M*]	122.1	Benzenoids	Naphthalenes		20190304JAP_CCSdatabase_final.csv
Emodin	C15H10O5	3220	CC1=CC2=C(C(=C1)O)C(=O)C3=C(C2=O)C=C(C=C3O)O	[M-H]	156.4	Benzenoids	Anthracenes	Anthraquinones	20190304JAP_CCSdatabase_final.csv
1,6-Dimethylnaphthalene	C12H12	11387	CC1=CC2=C(C=C1)C=C(C=C2)C	[M*]	126.3	Benzenoids	Naphthalenes		20190304JAP_CCSdatabase_final.csv
2,7-Dimethylnaphthalene	C12H12	11396	CC1=CC2=C(C=C1)C=CC(=C2)C	[M+H]	129.5	Benzenoids	Naphthalenes		20190304JAP_CCSdatabase_final.csv
3,6-Dimethylphenanthrene	C16H14	15304	CC1=CC2=C(C=C1)C=CC3=C2C=C(C=C3)C	[M*]	142.8	Benzenoids	Phenanthrenes and derivatives		20190304JAP_CCSdatabase_final.csv
2-Methylnaphthalene	C11H10	7055	CC1=CC2=CC=CC=C2C=C1	[M*]	121.8	Benzenoids	Naphthalenes		20190304JAP_CCSdatabase_final.csv
2,3-Dimethylanthracene	C16H14	69170	CC1=CC2=CC3=CC=CC=C3C=C2C=C1C	[M+H]	144.4	Benzenoids	Phenanthrenes and derivatives		20190304JAP_CCSdatabase_final.csv
Pendimethalin	C13H19N3O4	38479	CCC(CC)NC1=C(C=C(C(=C1[N+](=O)[O-])C)C)[N+](=O)[O-]	[M-H]	166.9	Benzenoids	Benzene and substituted derivatives	Aniline and substituted anilines	20190304JAP_CCSdatabase_final.csv
Metolachlor	C15H22ClNO2	4169	CCC1=CC=CC(=C1N(C(C)COC)C(=O)CCl)C	[M+H]	160.4	Benzenoids	Benzene and substituted derivatives	Anilides	20190304JAP_CCSdatabase_final.csv
Acetochlor	C14H20ClNO2	1988	CCC1=CC=CC(=C1N(COCC)C(=O)CCl)C	[M+H]	173.5	Benzenoids	Benzene and substituted derivatives	Phenylacetamides	20190304JAP_CCSdatabase_final.csv
Bis(2-ethylhexyl)phthalate	C24H38O4	8343	CCCCC(CC)COC(=O)C1=CC=CC=C1C(=O)OCC(CC)CCCC	[M+H]	212.2	Benzenoids	Benzene and substituted derivatives	Benzoic acids and derivatives	20190304JAP_CCSdatabase_final.csv
11-beta-Prostaglandin F2alpha	C20H34O5	5280886	CCCCC[C@@H](/C=C/[C@H]1[C@H](C[C@@H]([C@@H]1C/C=C\CCCC(=O)O)O)O)O	[M-H]	193.5	Benzenoids	Benzene and substituted derivatives	Diphenylethers	20190304JAP_CCSdatabase_final.csv
Monoethyl Phthalate	C10H10O4	75318	CCOC(=O)C1=CC=CC=C1C(=O)O	[M-H]	147.7	Benzenoids	Benzene and substituted derivatives	Benzoic acids and derivatives	20190304JAP_CCSdatabase_final.csv
Homovanillic Acid	C9H10O4	108965	CCOC(=O)CC1=CC(=C(C=C1)O)OC	[M-H]	140.3	Benzenoids	Phenols	Methoxyphenols	20190304JAP_CCSdatabase_final.csv
Diuron	C9H10Cl2N2O	3120	CN(C)C(=O)NC1=CC(=C(C=C1)Cl)Cl	[M-H]	149.4	Benzenoids	Benzene and substituted derivatives	N-phenylureas	20190304JAP_CCSdatabase_final.csv
Fluometuron	C10H11F3N2O	16562	CN(C)C(=O)NC1=CC=CC(=C1)C(F)(F)F	[M-H]	147.8	Benzenoids	Benzene and substituted derivatives	N-phenylureas	20190304JAP_CCSdatabase_final.csv
Epinephrine	C9H13NO3	5816	CNC[C@@H](C1=CC(=C(C=C1)O)O)O	[M-H]	140.3	Benzenoids	Phenols	Benzenediols	20190304JAP_CCSdatabase_final.csv
2',4'-Dihydroxyacetophenone	C8H8O3	134601	COC(=O)[C@H](CC1=CC=CC=C1)NC(=O)[C@H](CC(=O)O)N	[M-H]	126.6	Benzenoids	Benzene and substituted derivatives	Acetophenones	20190304JAP_CCSdatabase_final.csv
Methyleugenol	C11H14O2	7127	COC1=C(C=C(C=C1)CC=C)OC	[M-H]	133.2	Benzenoids	Benzene and substituted derivatives	Methoxybenzenes	20190304JAP_CCSdatabase_final.csv
3-Methoxy-4-hydroxymandelate	C9H10O5	1245	COC1=C(C=CC(=C1)C(C(=O)O)O)O	[M-H]	130.6	Benzenoids	Phenols	Methoxyphenols	20190304JAP_CCSdatabase_final.csv
Homovanillate	C9H10O4	1738	COC1=C(C=CC(=C1)CC(=O)O)O	[M-H]	136.3	Benzenoids	Phenols	Methoxyphenols	20190304JAP_CCSdatabase_final.csv
3-Methoxytyramine	C9H13NO2	1669	COC1=C(C=CC(=C1)CCN)O	[M+H]	146.9	Benzenoids	Phenols	Methoxyphenols	20190304JAP_CCSdatabase_final.csv
Sulfadimethoxine	C12H14N4O4S	5323	COC1=NC(=NC(=C1)NS(=O)(=O)C2=CC=C(C=C2)N)OC	[M-H]	171.3	Benzenoids	Benzene and substituted derivatives	Benzenesulfonamides	20190304JAP_CCSdatabase_final.csv
5-iPF2ÃÂÃÂ±-VI	C20H34O5	42607309	CCCCC/C=C\C[C@H]1[C@@H](C[C@@H]([C@H]1/C=C/C(CCCC(=O)O)O)O)O	[M-H]-	194.9666667	Benzenoids	Lipids		metabolitedata.csv
Monocyclohexyl phthalate	C14H16O4	165618	C1CCC(CC1)OC(=O)C2=CC=CC=C2C(=O)O	[M-H]-	159.72	Benzenoids			UACCSCEC_ac1c00142_si_002_TS-5.csv
Mono-iso-butyl phthalate	C12H14O4	92272	CC(C)COC(=O)C1=CC=CC=C1C(=O)O	[M-H]-	151.83	Benzenoids			UACCSCEC_ac1c00142_si_002_TS-5.csv
Mono-carboxy-isononyl phthalate	C18H24O6	145459124	CC(CCCCCCCC(=O)O)OC(=O)C1=CC=CC=C1C(=O)O	[M-H]-	177.47	Benzenoids			UACCSCEC_ac1c00142_si_002_TS-5.csv
Mono-hydroxy-isononyl phthalate	C17H24O5	102401880	CC(O)CCC(C)CCCOC(=O)C1=CC=CC=C1C(O)=O	[M-H]-	172.5	Benzenoids			UACCSCEC_ac1c00142_si_002_TS-5.csv
Mono(2-ethyl-5-oxohexyl)phthalate	C16H20O5	119096	CCC(CCC(=O)C)COC(=O)C1=CC=CC=C1C(=O)O	[M-H]-	168.35	Benzenoids			UACCSCEC_ac1c00142_si_002_TS-5.csv
Mono(2-ethyl-5-hydroxyhexyl) phthalate	C16H22O5	170295	CCC(CCC(C)O)COC(=O)C1=CC=CC=C1C(=O)O	[M-H]-	168.99	Benzenoids			UACCSCEC_ac1c00142_si_002_TS-5.csv
Mono-(2-ethyl-5-carboxypentyl) phthalate	C16H20O6	148386	CCC(CCCC(=O)O)COC(=O)C1=CC=CC=C1C(=O)O	[M-H]-	169.87	Benzenoids			UACCSCEC_ac1c00142_si_002_TS-5.csv
Mono-2-(propyl-6-oxoheptyl)-phthalate	C18H24O5	131668297	CCCC(CCCC(C)=O)COC(=O)c1ccccc1C(=O)O	[M-H]-	177.7	Benzenoids			UACCSCEC_ac1c00142_si_002_TS-5.csv
6-Hydroxy Monopropylheptylphthalate	C18H26O5	131668311	CCCC(CCCC(C)O)COC(=O)C1=CC=CC=C1C(=O)O	[M-H]-	178.62	Benzenoids			UACCSCEC_ac1c00142_si_002_TS-5.csv
Mono(2-propyl-6-carboxyhexyl) phthalate	C18H24O6	139036037	CCCC(CCCCC(=O)O)COC(=O)c1ccccc1C(=O)O	[M-H]-	179.64	Benzenoids			UACCSCEC_ac1c00142_si_002_TS-5.csv
Mono(2-ethylhexyl) phthalate	C16H22O4	20393	CCCCC(CC)COC(=O)C1=CC=CC=C1C(=O)O	[M-H]-	168.91	Benzenoids			UACCSCEC_ac1c00142_si_002_TS-5.csv
2,4-Di-(2-ethylhexyl) trimellitate	C25H38O6	14048412	CCCCC(CC)COC(=O)c1ccc(C(=O)O)c(C(=O)OCC(CC)CCCC)c1	[M+H]+	218.39	Benzenoids			UACCSCEC_ac1c00142_si_002_TS-5.csv
Mono-n-butyl phthalate	C12H14O4	8575	CCCCOC(=O)C1=CC=CC=C1C(=O)O	[M-H]-	151.11	Benzenoids			UACCSCEC_ac1c00142_si_002_TS-5.csv
Mono-methyl phthalate	C9H8O4	20392	COC(=O)C1=CC=CC=C1C(=O)O	[M-H]-	137.01	Benzenoids			UACCSCEC_ac1c00142_si_002_TS-5.csv
Decachlorobiphenyl (PCB 209)	C12Cl10	16318	C1(=C(C(=C(C(=C1Cl)Cl)Cl)Cl)Cl)C2=C(C(=C(C(=C2Cl)Cl)Cl)Cl)Cl	[M+H]	185.9	Benzenoids	PCBs		metabolitedata.csv
2,2',3,3',4,5,5',6,6'-Nonachlorobiphenyl (PCB-208)	C12H1Cl9	40484	C1=C(C(=C(C(=C1Cl)Cl)C2=C(C(=C(C(=C2Cl)Cl)Cl)Cl)Cl)Cl)Cl	[M+H]	182.07	Benzenoids	PCBs		metabolitedata.csv
2,2',3,3',5,5',6,6'-Octachlorobiphenyl (PCB-202)	C12H2Cl8	16495	C1=C(C(=C(C(=C1Cl)Cl)C2=C(C(=CC(=C2Cl)Cl)Cl)Cl)Cl)Cl	[M+H]	176.9	Benzenoids	PCBs		metabolitedata.csv
2,2',3,3',4,4',5,6,6'-Nonachlorobiphenyl (PCB-207)	C12H1Cl9	91648	C1=C(C(=C(C(=C1Cl)Cl)Cl)C2=C(C(=C(C(=C2Cl)Cl)Cl)Cl)Cl)Cl	[M+H]	181.7	Benzenoids	PCBs		metabolitedata.csv
2,2',3,3',4,4',5,5',6-Nonachlorobiphenyl (PCB-206)	C12H1Cl9	38411	C1=C(C(=C(C(=C1Cl)Cl)Cl)Cl)C2=C(C(=C(C(=C2Cl)Cl)Cl)Cl)Cl	[M+H]	183.47	Benzenoids	PCBs		metabolitedata.csv
2,2',3,3',4,4',5,5'-Octachlorobiphenyl (PCB-194)	C12H2Cl8	37251	C1=C(C(=C(C(=C1Cl)Cl)Cl)Cl)C2=CC(=C(C(=C2Cl)Cl)Cl)Cl	[M+H]	180.33	Benzenoids	PCBs		metabolitedata.csv
2,2',3,3',4,4',5,6-Octachlorobiphenyl (PCB-195)	C12H2Cl8	91722	C1=C(C=C(C(=C1Cl)Cl)Cl)C2=C(C(=C(C(=C2Cl)Cl)Cl)Cl)Cl	[M+H]	178.03	Benzenoids	PCBs		metabolitedata.csv
2,3,3',4',5,5',6-Heptachlorobiphenyl (PCB-193)	C12H3Cl7	633844	C1=C(C=C(C(=C1Cl)Cl)Cl)C2=C(C(=CC(=C2Cl)Cl)Cl)Cl	[M+H]	173.87	Benzenoids	PCBs		metabolitedata.csv
2,3,3',4,4',5,5'-Heptachlorobiphenyl (PCB-189)	C12H3Cl7	38306	C1=C(C=C(C(=C1Cl)Cl)Cl)C2=CC(=C(C(=C2Cl)Cl)Cl)Cl	[M+H]	173.93	Benzenoids	PCBs		metabolitedata.csv
2,3',4,4',5,5'-Hexachlorobiphenyl (PCB-167)	C12H4Cl6	40479	C1=C(C=C(C(=C1Cl)Cl)Cl)C2=CC(=C(C=C2Cl)Cl)Cl	[M+H]	167.83	Benzenoids	PCBs		metabolitedata.csv
2,2ÃÂ¢ÃÂÃÂ²,3,4,4ÃÂ¢ÃÂÃÂ²,5ÃÂ¢ÃÂÃÂ²-Hexachlorobiphenyl (PCB 138)	C12H4Cl6	37035	C1=CC(=C(C(=C1C2=CC(=C(C=C2Cl)Cl)Cl)Cl)Cl)Cl	[M+H]	168	Benzenoids	PCBs		metabolitedata.csv
2,3,3',4,4',5,6-Heptachlorobiphenyl (PCB-190)	C12H3Cl7	38857	C1=CC(=C(C=C1C2=C(C(=C(C(=C2Cl)Cl)Cl)Cl)Cl)Cl)Cl	[M+H]	173.33	Benzenoids	PCBs		metabolitedata.csv
2,3,3',4,4'-Pentachlorobiphenyl (PCB-105)	C12H5Cl5	36188	C1=CC(=C(C=C1C2=C(C(=C(C=C2)Cl)Cl)Cl)Cl)Cl	[M+H]	161.63	Benzenoids	PCBs		metabolitedata.csv
2,3,3',4,4',5-Hexachlorobiphenyl (PCB-156)	C12H4Cl6	38019	C1=CC(=C(C=C1C2=CC(=C(C(=C2Cl)Cl)Cl)Cl)Cl)Cl	[M+H]	168.23	Benzenoids	PCBs		metabolitedata.csv
2,4,5-Trichlorobiphenyl (PCB 29)	C12H7Cl3	27960	C1=CC(=CC=C1C2=C(C=CC(=C2)Cl)Cl)Cl	[M+H]	150.67	Benzenoids	PCBs		metabolitedata.csv
2,3,4,4',5-Pentachlorobiphenyl (PCB-114)	C12H5Cl5	53036	C1=CC(=CC=C1C2=CC(=C(C(=C2Cl)Cl)Cl)Cl)Cl	[M+H]	162.13	Benzenoids	PCBs		metabolitedata.csv
2,4,6-Trichlorobiphenyl (PCB-30)	C12H7Cl3	37247	C1=CC=C(C=C1)C2=C(C=C(C=C2Cl)Cl)Cl	[M+H]	150.1	Benzenoids	PCBs		metabolitedata.csv
Diisodecyl phthalate	C28H46O4	33599	CC(C)CCCCCCCOC(=O)C1=CC=CC=C1C(=O)OCCCCCCCC(C)C	[M+H]+	227.85	Benzenoids			UACCSCEC_ac1c00142_si_002_TS-5.csv
Diisononyl phthalate	C26H42O4	590836	CC(C)CCCCCCOC(=O)C1=CC=CC=C1C(=O)OCCCCCCC(C)C	[M+H]+	220.6	Benzenoids			UACCSCEC_ac1c00142_si_002_TS-5.csv
Indeno(1,2,3-cd)pyrene (I12)	C22H12	9131	C1=CC=C2C(=C1)C3=C4C2=CC5=CC=CC6=C5C4=C(C=C6)C=C3	[M+H]	159.653598	Benzenoids	PAHs		metabolitedata.csv
1,6-Dimethylnaphthalene (16D)	C12H12	11328	CC1=CC2=CC=CC(=C2C=C1)C	[M+H]	130.1290766	Benzenoids	PAHs		metabolitedata.csv
2-Methylanthracene (2ME)	C15H12	11936	CC1=CC2=CC3=CC=CC=C3C=C2C=C1	[M+H]	138.6077417	Benzenoids	PAHs		metabolitedata.csv
C60 Fullerene	C60	123591	C12=C3C4=C5C6=C1C7=C8C9=C1C%10=C%11C(=C29)C3=C2C3=C4C4=C5C5=C9C6=C7C6=C7C8=C1C1=C8C%10=C%10C%11=C2C2=C3C3=C4C4=C5C5=C%11C%12=C(C6=C95)C7=C1C1=C%12C5=C%11C4=C3C3=C5C(=C81)C%10=C23	[M*]	210.8	Benzenoids			20190304JAP_CCSdatabase_final.csv
Fullerene C70	C70	16131935	C12=C3C4=C5C6=C7C8=C9C%10=C%11C%12=C%13C%10=C%10C8=C5C1=C%10C1=C%13C5=C8C1=C2C1=C3C2=C3C%10=C%13C%14=C3C1=C8C1=C3C5=C%12C5=C8C%11=C%11C9=C7C7=C9C6=C4C2=C2C%10=C4C(=C29)C2=C6C(=C8C8=C9C6=C4C%13=C9C(=C%141)C3=C85)C%11=C27	[M*]	226.1	Benzenoids			20190304JAP_CCSdatabase_final.csv
Mono(2-ethyl-oxo-hexyl) trimelliate	C17H20O7	155898861	CCC(CCC(C)=O)COC(=O)c1cc(C(=O)O)ccc1C(=O)O	[M-H]-	178.84	Benzenoids			UACCSCEC_ac1c00142_si_002_TS-5.csv
Mono-1-(2-ethyl-5-carboxyhexyl)trimellitate	C17H20O8	155898866	CCC(CCCC(=O)O)COC(=O)c1cc(C(=O)O)ccc1C(=O)O	[M-H]-	180.56	Benzenoids			UACCSCEC_ac1c00142_si_002_TS-5.csv
Mono-1-[2(carboxymethyl)hexyl] trimellitate	C17H20O8	155898862	CCCCC(COC(=O)c1cc(C(=O)O)ccc1C(=O)O)CC(=O)O	[M-H]-	182.23	Benzenoids			UACCSCEC_ac1c00142_si_002_TS-5.csv
2,3',4',5-Tetrachlorobiphenyl (PCB-70)	C12H6Cl4	36186	C1=CC(=C(C=C1C2=C(C=CC(=C2)Cl)Cl)Cl)Cl	[M+H]	155.63	Benzenoids	PCBs		metabolitedata.csv
2,2',4,5',6-Pentachlorobiphenyl (PCB-103)	C12H5Cl5	63086	C1=CC(=C(C=C1Cl)C2=C(C=C(C=C2Cl)Cl)Cl)Cl	[M+H]	160.7	Benzenoids	PCBs		metabolitedata.csv
2,2',5,5'-Tetrachlorobiphenyl (PCB 52)	C12H6Cl4	37248	C1=CC(=C(C=C1Cl)C2=C(C=CC(=C2)Cl)Cl)Cl	[M+H]	156.7	Benzenoids	PCBs		metabolitedata.csv
2,2ÃÂ¢ÃÂÃÂ²,4,5,5ÃÂ¢ÃÂÃÂ²-Pentachlorobiphenyl (PCB 101)	C12H5Cl5	37807	C1=CC(=C(C=C1Cl)C2=CC(=C(C=C2Cl)Cl)Cl)Cl	[M+H]	162.6	Benzenoids	PCBs		metabolitedata.csv
2,4,4'-Trichlorobiphenyl (PCB-28)	C12H7Cl3	23448	C1=CC(=CC=C1C2=C(C=C(C=C2)Cl)Cl)Cl	[M+H]	149.67	Benzenoids	PCBs		metabolitedata.csv
TRI-N-HEXYLTRIMELLITATE	C27H42O6	73718	CCCCCCOC(=O)C1=CC(=C(C=C1)C(=O)OCCCCCC)C(=O)OCCCCCC	[M+H]+	236.57	Benzenoids			UACCSCEC_ac1c00142_si_002_TS-5.csv
Caffeate	C9H8O4	689043	C1=CC(=C(C=C1/C=C/C(=O)O)O)O	[M-H]	133.2	Benzenoids	Cinnamic acids and derivatives	Hydroxycinnamic acids and derivatives	20190304JAP_CCSdatabase_final.csv
Isoliquiritigenin	C15H12O4	638278	C1=CC(=CC=C1/C=C/C(=O)C2=C(C=C(C=C2)O)O)O	[M-H]	163.7	Benzenoids	Linear 1,3-diarylpropanoids	Chalcones and dihydrochalcones	20190304JAP_CCSdatabase_final.csv
Hydroxyphenyllactate	C9H10O4	9378	C1=CC(=CC=C1CC(C(=O)O)O)O	[M-H]	142.2	Benzenoids	Phenylpropanoic acids		20190304JAP_CCSdatabase_final.csv
3-(2-Hydroxyphenyl)propanoate	C9H10O3	873	C1=CC=C(C(=C1)CCC(=O)O)O	[M-H]	133.6	Benzenoids	Phenylpropanoic acids		20190304JAP_CCSdatabase_final.csv
Ferulate	C10H10O4	445858	COC1=C(C=CC(=C1)/C=C/C(=O)O)O	[M-H]	140.1	Benzenoids	Cinnamic acids and derivatives	Hydroxycinnamic acids and derivatives	20190304JAP_CCSdatabase_final.csv
3-Phenoxybenzoic acid	C13H10O3	19539	C1=CC=C(C=C1)OC2=CC=CC(=C2)C(=O)O	[M-H]-	155.84	Benzenoids			UACCSCEC_ac1c00142_si_002_TS-5.csv
4-n-Octylphenol	C14H22O	15730	CCCCCCCCC1=CC=C(C=C1)O	[M-H]-	160.03	Benzenoids			UACCSCEC_ac1c00142_si_002_TS-5.csv
4-Nonylphenol	C15H24O	1752	CCCCCCCCCC1=CC=C(C=C1)O	[M-H]-	161.07	Benzenoids			UACCSCEC_ac1c00142_si_002_TS-5.csv
Mono(2-ethyl-5-hydroxyhexyl) terephthalate	C16H22O5	155898867	CCC(CCC(C)O)COC(=O)c1ccc(C(=O)O)cc1	[M-H]-	185.08	Benzenoids			UACCSCEC_ac1c00142_si_002_TS-5.csv
Mono(2-ethyl-5-carboxypentyl) terephthalate	C16H20O6	145459123	CCC(CCCC(=O)O)COC(=O)C1=CC=C(C=C1)C(=O)O	[M-H]-	168.42	Benzenoids			UACCSCEC_ac1c00142_si_002_TS-5.csv
Mono(2-ethylhexyl) terephthalate	C16H22O4	154683	CCCCC(CC)COC(=O)C1=CC=C(C=C1)C(=O)O	[M-H]-	183.54	Benzenoids			UACCSCEC_ac1c00142_si_002_TS-5.csv
Decabromodiphenyl ether	C12Br10O	14410	C1(=C(C(=C(C(=C1Br)Br)Br)Br)Br)OC2=C(C(=C(C(=C2Br)Br)Br)Br)Br	[M+H]	205.23	Benzenoids	OH-PBDEs		metabolitedata.csv
2,2',3,4,4ÃÂ¢ÃÂÃÂ,5',6-Heptabromodiphenyl ether	C12H3Br7O	15509899	C1=C(C(=CC(=C1Br)Br)Br)OC2=C(C(=C(C=C2Br)Br)Br)Br	[M+H]	189.87	Benzenoids	OH-PBDEs		metabolitedata.csv
2,2',4,4ÃÂ¢ÃÂÃÂ,5,5'-Hexabromodiphenyl ether	C12H4Br6O	155166	C1=C(C(=CC(=C1Br)Br)Br)OC2=CC(=C(C=C2Br)Br)Br	[M+H]	183.53	Benzenoids	OH-PBDEs		metabolitedata.csv
2,2',4,4',5,6ÃÂ¢ÃÂÃÂ-Hexabromodiphenyl ether	C12H4Br6O	15509898	C1=C(C=C(C(=C1Br)OC2=CC(=C(C=C2Br)Br)Br)Br)Br	[M+H]	183.57	Benzenoids	OH-PBDEs		metabolitedata.csv
2,2',4,4ÃÂ¢ÃÂÃÂ,6-Pentabromodiphenyl ether	C12H5Br5O	154083	C1=CC(=C(C=C1Br)Br)OC2=C(C=C(C=C2Br)Br)Br	[M+H]	175.37	Benzenoids	OH-PBDEs		metabolitedata.csv
2,3',4,4'-Tetrabromodiphenyl ether	C12H6Br4O	15509893	C1=CC(=C(C=C1OC2=C(C=C(C=C2)Br)Br)Br)Br	[M+H]	170.3	Benzenoids	OH-PBDEs		metabolitedata.csv
3,3',4,4'-Tetrabromodiphenyl ether	C12H6Br4O	13283771	C1=CC(=C(C=C1OC2=CC(=C(C=C2)Br)Br)Br)Br	[M+H]	172.07	Benzenoids	OH-PBDEs		metabolitedata.csv
2,2',4-Tribromodiphenyl ether	C12H7Br3O	14274807	C1=CC=C(C(=C1)OC2=C(C=C(C=C2)Br)Br)Br	[M+H]	160.63	Benzenoids	OH-PBDEs		metabolitedata.csv
Carbocyclic Thromboxane A2	C22H36O3	1202	CCCCCC(C=CC1CC2CC(C2)C1CC=CCCCC(=O)O)O	[M-H]-	201.1	Benzenoids	Lipids		metabolitedata.csv
Isooctyl-2-phenoxyethyl terephthalate	C24H30O5	44152553	CC(C)CCCCCOC(=O)C1=CC=C(C=C1)C(=O)OCCOC2=CC=CC=C2	[M+H]+	218.61	Benzenoids			UACCSCEC_ac1c00142_si_002_TS-5.csv
3,3',4,4',5,5'-Hexachlorobiphenyl (PCB-169)	C12H4Cl6	36231	C1=C(C=C(C(=C1Cl)Cl)Cl)C2=CC(=C(C(=C2)Cl)Cl)Cl	[M+H]	169.97	Benzenoids	PCBs		metabolitedata.csv
3,3',4,4',5-Pentachlorobiphenyl (PCB-126)	C12H5Cl5	63090	C1=CC(=C(C=C1C2=CC(=C(C(=C2)Cl)Cl)Cl)Cl)Cl	[M+H]	164.43	Benzenoids	PCBs		metabolitedata.csv
3,3ÃÂ¢ÃÂÃÂ²,4,4ÃÂ¢ÃÂÃÂ²-Tetrachlorobiphenyl (PCB 77)	C12H6Cl4	36187	C1=CC(=C(C=C1C2=CC(=C(C=C2)Cl)Cl)Cl)Cl	[M+H]	156.8	Benzenoids	PCBs		metabolitedata.csv
3,4,4',5-Tetrachlorobiphenyl (PCB-81)	C12H6Cl4	51043	C1=CC(=CC=C1C2=CC(=C(C(=C2)Cl)Cl)Cl)Cl	[M+H]	158.57	Benzenoids	PCBs		metabolitedata.csv
1, 2-Dimethylnaphthalene (1DL)	C12H12	11317	CC1=C(C2=CC=CC=C2C=C1)C	[M+H]	130.9333769	Benzenoids	PAHs		metabolitedata.csv
4-t-Octylphenol	C14H22O	8814	CC(C)(C)CC(C)(C)C1=CC=C(C=C1)O	[M-H]-	156.73	Benzenoids			UACCSCEC_ac1c00142_si_002_TS-5.csv
4-Coumarate	C9H8O3	637542	C1=CC(=CC=C1/C=C/C(=O)O)O	[M-H]	131.3	Benzenoids	Cinnamic acids and derivatives	Hydroxycinnamic acids and derivatives	20190304JAP_CCSdatabase_final.csv
Cinnamic Acid	C9H8O2	444539	C1=CC=C(C=C1)/C=C/C(=O)O	[M+H]	144.4	Benzenoids	Cinnamic acids and derivatives	Cinnamic acids	20190304JAP_CCSdatabase_final.csv
Bisphenol Z	C18H20O2	232446	C1CCC(CC1)(C2=CC=C(C=C2)O)C3=CC=C(C=C3)O	[M-H]-	174.21	Benzenoids	Bisphenols		UACCSCEC_ac1c00142_si_002_TS-5.csv
trans-Cinnamaldehyde	C9H8O	637511	C1=CC=C(C=C1)/C=C/C=O	[M+H]	121.5	Benzenoids	Cinnamaldehydes		20190304JAP_CCSdatabase_final.csv
Bisphenol S	C12H10O4S	6626	C1=CC(=CC=C1O)S(=O)(=O)C2=CC=C(C=C2)O	[M-H]-	155.49	Benzenoids	Bisphenols		UACCSCEC_ac1c00142_si_002_TS-5.csv
Isodecyl diphenyl phosphate	C22H31O4P	34697	CC(C)CCCCCCCOP(=O)(OC1=CC=CC=C1)OC2=CC=CC=C2	[M+H]+	200.2	Benzenoids	Organophosphorus		UACCSCEC_ac1c00142_si_002_TS-5.csv
tri-m-tolyl phosphate	C21H21O4P	11232	CC1=CC(=CC=C1)OP(=O)(OC2=CC=CC(=C2)C)OC3=CC=CC(=C3)C	[M+H]+	188.56	Benzenoids	Organophosphorus		UACCSCEC_ac1c00142_si_002_TS-5.csv
Triclosan	C12H7Cl3O2	5564	C1=CC(=C(C=C1Cl)O)OC2=C(C=C(C=C2)Cl)Cl	[M-H]-	158.94	Benzenoids			UACCSCEC_ac1c00142_si_002_TS-5.csv
Galactarate	C6H10O8	3037582	[C@@H]([C@@H]([C@H](C(=O)O)O)O)([C@@H](C(=O)O)O)O	[M-H]	132.9	Organic oxygen compounds	Organooxygen compounds	Carbohydrates and carbohydrate conjugates	20190304JAP_CCSdatabase_final.csv
Galacturonate	C6H10O7	445929	[C@@H]1([C@H]([C@H](O[C@@H]([C@@H]1O)O)C(=O)O)O)O	[M-H]	131.4	Organic oxygen compounds	Organooxygen compounds	Carbohydrates and carbohydrate conjugates	20190304JAP_CCSdatabase_final.csv
D-(-)-Tartartic Acid	C4H6O6	439655	[C@H]([C@@H](C(=O)O)O)(C(=O)O)O	[M-H]	118.3	Organic oxygen compounds	Organooxygen compounds	Carbohydrates and carbohydrate conjugates	20190304JAP_CCSdatabase_final.csv
D-Xylose-5-phosphate Lithium Salt	C5H12O8P	129011240	[Li+].C([C@H]([C@@H]([C@H](C=O)O)O)O)OP(=O)(O)O	[M-H]	138.9	Organic oxygen compounds	Organooxygen compounds	Carbohydrates and carbohydrate conjugates	20190304JAP_CCSdatabase_final.csv
L-Ribonic Acid Lithium Salt	C5H11O6	6602426	C([C@@H]([C@@H]([C@H](C(=O)O)O)O)O)O	[M-H]	127.9	Organic oxygen compounds	Organooxygen compounds	Carbohydrates and carbohydrate conjugates	20190304JAP_CCSdatabase_final.csv
Arabitol	C5H12O5	439255	C([C@@H](C([C@H](CO)O)O)O)O	[M-H]	125.2	Organic oxygen compounds	Organooxygen compounds	Carbohydrates and carbohydrate conjugates	20190304JAP_CCSdatabase_final.csv
Lactulose	C12H22O11	11333	C([C@@H]1[C@@H]([C@@H]([C@H]([C@@H](O1)O[C@@H]2[C@H](O[C@@]([C@H]2O)(CO)O)CO)O)O)O)O	[M-H]	177.7	Organic oxygen compounds	Organooxygen compounds	Carbohydrates and carbohydrate conjugates	20190304JAP_CCSdatabase_final.csv
Lactose	C12H22O11	104938	C([C@@H]1[C@@H]([C@@H]([C@H]([C@@H](O1)O[C@@H]2[C@H](O[C@@H]([C@@H]([C@H]2O)O)O)CO)O)O)O)O.O	[M-H]	176.8	Organic oxygen compounds	Organooxygen compounds	Carbohydrates and carbohydrate conjugates	20190304JAP_CCSdatabase_final.csv
Stachyose	C24H42O21	439531	C([C@@H]1[C@@H]([C@@H]([C@H]([C@H](O1)OC[C@@H]2[C@@H]([C@@H]([C@H]([C@H](O2)OC[C@@H]3[C@H]([C@@H]([C@H]([C@H](O3)O[C@]4([C@H]([C@@H]([C@H](O4)CO)O)O)CO)O)O)O)O)O)O)O)O)O)O	[M-H]	223.8	Organic oxygen compounds	Organooxygen compounds	Carbohydrates and carbohydrate conjugates	20190304JAP_CCSdatabase_final.csv
D-(+)-Raffinose Pentahydrate	C18H32O16	439242	C([C@@H]1[C@@H]([C@@H]([C@H]([C@H](O1)OC[C@@H]2[C@H]([C@@H]([C@H]([C@H](O2)O[C@]3([C@H]([C@@H]([C@H](O3)CO)O)O)CO)O)O)O)O)O)O)O	[M-H]	197	Organic oxygen compounds	Organooxygen compounds	Carbohydrates and carbohydrate conjugates	20190304JAP_CCSdatabase_final.csv
Melibiose	C12H22O11	440658	C([C@@H]1[C@@H]([C@@H]([C@H]([C@H](O1)OC[C@@H]2[C@H]([C@@H]([C@H](C(O2)O)O)O)O)O)O)O)O	[M-H]	178	Organic oxygen compounds	Organooxygen compounds	Carbohydrates and carbohydrate conjugates	20190304JAP_CCSdatabase_final.csv
Galactose-1-phosphate	C6H13O9P	87916	C([C@@H]1[C@@H]([C@@H]([C@H]([C@H](O1)OP(=O)([O-])[O-])O)O)O)O.[K+].[K+]	[M-H]	148.2	Organic oxygen compounds	Organooxygen compounds	Carbohydrates and carbohydrate conjugates	20190304JAP_CCSdatabase_final.csv
D-(+)-Melezitose Hydrate	C18H32O16	126963632	C([C@@H]1[C@H]([C@@H]([C@@H]([C@H](O1)O[C@H]2[C@@H]([C@H](O[C@@]2(CO)O[C@@H]3[C@@H]([C@H]([C@@H]([C@H](O3)CO)O)O)O)CO)O)O)O)O)O.O	[M-H]	202.8	Organic oxygen compounds	Organooxygen compounds	Carbohydrates and carbohydrate conjugates	20190304JAP_CCSdatabase_final.csv
Mannose-6-phosphate	C6H13O9P	65127	C([C@@H]1[C@H]([C@@H]([C@@H](C(O1)O)O)O)O)OP(=O)(O)O	[M-H]	146.2	Organic oxygen compounds	Organooxygen compounds	Carbohydrates and carbohydrate conjugates	20190304JAP_CCSdatabase_final.csv
beta-D-Glucosamine	C6H13NO5	441477	C([C@@H]1[C@H]([C@@H]([C@H]([C@@H](O1)O)N)O)O)O	[M+H]	134.7	Organic oxygen compounds	Organooxygen compounds	Carbohydrates and carbohydrate conjugates	20190304JAP_CCSdatabase_final.csv
Glucosamine-6-sulfate	C6H13NO8S	72361	C([C@@H]1[C@H]([C@@H]([C@H]([C@@H](O1)O)N)O)O)OS(=O)(=O)O	[M-H]	149.5	Organic oxygen compounds	Organooxygen compounds	Carbohydrates and carbohydrate conjugates	20190304JAP_CCSdatabase_final.csv
Sophorose	C12H22O11	92797	C([C@@H]1[C@H]([C@@H]([C@H]([C@@H](O1)O[C@@H](C=O)[C@H]([C@@H]([C@@H](CO)O)O)O)O)O)O)O	[M-H]	186.5	Organic oxygen compounds	Organooxygen compounds	Carbohydrates and carbohydrate conjugates	20190304JAP_CCSdatabase_final.csv
Cellobiose	C12H22O11	10712	C([C@@H]1[C@H]([C@@H]([C@H]([C@@H](O1)O[C@@H]2[C@H](O[C@H]([C@@H]([C@H]2O)O)O)CO)O)O)O)O	[M-H]	179.7	Organic oxygen compounds	Organooxygen compounds	Carbohydrates and carbohydrate conjugates	20190304JAP_CCSdatabase_final.csv
Cellopentaose > 80%	C30H52O26	52940142	C([C@@H]1[C@H]([C@@H]([C@H]([C@@H](O1)O[C@@H]2[C@H](O[C@H]([C@@H]([C@H]2O)O)O[C@@H]3[C@H](O[C@H]([C@@H]([C@H]3O)O)O[C@@H]4[C@H](O[C@H]([C@@H]([C@H]4O)O)O[C@H]([C@@H](CO)O)[C@@H]([C@H](C=O)O)O)CO)CO)CO)O)O)O)O	[M-H]	246.4	Organic oxygen compounds	Organooxygen compounds	Carbohydrates and carbohydrate conjugates	20190304JAP_CCSdatabase_final.csv
beta-Gentiobiose	C12H22O11	441422	C([C@@H]1[C@H]([C@@H]([C@H]([C@@H](O1)OC[C@@H]2[C@H]([C@@H]([C@H]([C@@H](O2)O)O)O)O)O)O)O)O	[M-H]	180.2	Organic oxygen compounds	Organooxygen compounds	Carbohydrates and carbohydrate conjugates	20190304JAP_CCSdatabase_final.csv
D-(+)-Trehalose Dihydrate	C12H22O11	7427	C([C@@H]1[C@H]([C@@H]([C@H]([C@H](O1)O[C@@H]2[C@@H]([C@H]([C@@H]([C@H](O2)CO)O)O)O)O)O)O)O	[M-H]	169.9	Organic oxygen compounds	Organooxygen compounds	Carbohydrates and carbohydrate conjugates	20190304JAP_CCSdatabase_final.csv
Maltopentaose	C30H52O26	13489094	C([C@@H]1[C@H]([C@@H]([C@H]([C@H](O1)O[C@@H]2[C@H](O[C@@H]([C@@H]([C@H]2O)O)O[C@@H]3[C@H](O[C@@H]([C@@H]([C@H]3O)O)O[C@@H]4[C@H](O[C@@H]([C@@H]([C@H]4O)O)O[C@@H]5[C@H](O[C@@H]([C@@H]([C@H]5O)O)O)CO)CO)CO)CO)O)O)O)O	[M-H]	256.4	Organic oxygen compounds	Organooxygen compounds	Carbohydrates and carbohydrate conjugates	20190304JAP_CCSdatabase_final.csv
D-Maltose	C12H22O11	6255	C([C@@H]1[C@H]([C@@H]([C@H]([C@H](O1)O[C@@H]2[C@H](O[C@H]([C@@H]([C@H]2O)O)O)CO)O)O)O)O	[M-H]	190.9	Organic oxygen compounds	Organooxygen compounds	Carbohydrates and carbohydrate conjugates	20190304JAP_CCSdatabase_final.csv
Sucrose	C12H22O11	5988	C([C@@H]1[C@H]([C@@H]([C@H]([C@H](O1)O[C@]2([C@H]([C@@H]([C@H](O2)CO)O)O)CO)O)O)O)O	[M-H]	168.2	Organic oxygen compounds	Organooxygen compounds	Carbohydrates and carbohydrate conjugates	20190304JAP_CCSdatabase_final.csv
1-Kestose	C18H32O16	440080	C([C@@H]1[C@H]([C@@H]([C@H]([C@H](O1)O[C@]2([C@H]([C@@H]([C@H](O2)CO)O)O)CO[C@]3([C@H]([C@@H]([C@H](O3)CO)O)O)CO)O)O)O)O	[M-H]	204.1	Organic oxygen compounds	Organooxygen compounds	Carbohydrates and carbohydrate conjugates	20190304JAP_CCSdatabase_final.csv
Isomaltose	C12H22O11	439193	C([C@@H]1[C@H]([C@@H]([C@H]([C@H](O1)OC[C@@H]2[C@H]([C@@H]([C@H](C(O2)O)O)O)O)O)O)O)O	[M-H]	180.1	Organic oxygen compounds	Organooxygen compounds	Carbohydrates and carbohydrate conjugates	20190304JAP_CCSdatabase_final.csv
Palatinose	C12H22O11	52994241	C([C@@H]1[C@H]([C@@H]([C@H]([C@H](O1)OC[C@@H]2[C@H]([C@@H](C(O2)(CO)O)O)O)O)O)O)O.O	[M-H]	175.4	Organic oxygen compounds	Organooxygen compounds	Carbohydrates and carbohydrate conjugates	20190304JAP_CCSdatabase_final.csv
alpha-D-Glucose-1-phosphate Disodium Salt Hydrate	C6H13O9P	16213556	C([C@@H]1[C@H]([C@@H]([C@H]([C@H](O1)OP(=O)([O-])[O-])O)O)O)O.O.O.O.O.[Na+].[Na+]	[M-H]	149.4	Organic oxygen compounds	Organooxygen compounds	Carbohydrates and carbohydrate conjugates	20190304JAP_CCSdatabase_final.csv
D-Glucose-1-phosphate	C6H13O9P	65533	C([C@@H]1[C@H]([C@@H]([C@H]([C@H](O1)OP(=O)(O)O)O)O)O)O	[M-H]	150.5	Organic oxygen compounds	Organooxygen compounds	Carbohydrates and carbohydrate conjugates	20190304JAP_CCSdatabase_final.csv
D-(+)-Glucosamine	C6H13NO5		C([C@@H]1[C@H]([C@@H]([C@H](C(O1)O)N)O)O)O	[M+H]	138.3	Organic oxygen compounds	Organooxygen compounds	Carbohydrates and carbohydrate conjugates	20190304JAP_CCSdatabase_final.csv
D-Glucosamine-6-phosphate	C6H14NO8P	440997	C([C@@H]1[C@H]([C@@H]([C@H](C(O1)O)N)O)O)OP(=O)(O)O	[M-H]	150.3	Organic oxygen compounds	Organooxygen compounds	Carbohydrates and carbohydrate conjugates	20190304JAP_CCSdatabase_final.csv
D-Glucose-6-phosphate Potassium Salt	C6H13O9P	5958	C([C@@H]1[C@H]([C@@H]([C@H](C(O1)O)O)O)O)OP(=O)(O)O	[M-H]	146.7	Organic oxygen compounds	Organooxygen compounds	Carbohydrates and carbohydrate conjugates	20190304JAP_CCSdatabase_final.csv
Fructose-1-phosphate	C6H13O9P	439394	C([C@@H]1[C@H]([C@@H](C(O1)(COP(=O)(O)O)O)O)O)O	[M-H]	146.3	Organic oxygen compounds	Organooxygen compounds	Carbohydrates and carbohydrate conjugates	20190304JAP_CCSdatabase_final.csv
D-Sedoheptulose	C7H14O7	441483	C([C@@H]1[C@H]([C@H]([C@@H]([C@](O1)(CO)O)O)O)O)O	[M-H]	145	Organic oxygen compounds	Organooxygen compounds	Carbohydrates and carbohydrate conjugates	20190304JAP_CCSdatabase_final.csv
D-Ribose-5-phosphate Disodium Salt Dihydrate	C5H11O8P	16211858	C([C@@H]1[C@H]([C@H](C(O1)O)O)O)OP(=O)([O-])[O-].O.O.[Na+].[Na+]	[M-H]	141.2	Organic oxygen compounds	Organooxygen compounds	Carbohydrates and carbohydrate conjugates	20190304JAP_CCSdatabase_final.csv
Galactitol	C6H14O6	11850	C([C@H]([C@@H]([C@@H]([C@H](CO)O)O)O)O)O	[M-H]	130.8	Organic oxygen compounds	Organooxygen compounds	Carbohydrates and carbohydrate conjugates	20190304JAP_CCSdatabase_final.csv
D-Mannosamine	C6H13NO5	9899264	C([C@H]([C@H]([C@@H]([C@@H](C=O)N)O)O)O)O.Cl	[M+H]	138	Organic oxygen compounds	Organooxygen compounds	Carbohydrates and carbohydrate conjugates	20190304JAP_CCSdatabase_final.csv
Mannitol	C6H14O6	6251	C([C@H]([C@H]([C@@H]([C@@H](CO)O)O)O)O)O	[M-H]	131.9	Organic oxygen compounds	Organooxygen compounds	Carbohydrates and carbohydrate conjugates	20190304JAP_CCSdatabase_final.csv
Sodium Gluconate	C6H12O7	84687	C([C@H]([C@H]([C@@H]([C@H](C(=O)[O-])O)O)O)O)O.[Na+]	[M-H]	132.6	Organic oxygen compounds	Organooxygen compounds	Carbohydrates and carbohydrate conjugates	20190304JAP_CCSdatabase_final.csv
Glucosaminate	C6H13NO6	73563	C([C@H]([C@H]([C@@H]([C@H](C(=O)O)N)O)O)O)O	[M-H]	136.1	Organic oxygen compounds	Organooxygen compounds	Carbohydrates and carbohydrate conjugates	20190304JAP_CCSdatabase_final.csv
D-Gluconate	C6H12O7	10690	C([C@H]([C@H]([C@@H]([C@H](C(=O)O)O)O)O)O)O	[M-H]	133.2	Organic oxygen compounds	Organooxygen compounds	Carbohydrates and carbohydrate conjugates	20190304JAP_CCSdatabase_final.csv
6-Phosphogluconic Acid	C6H13O10P	91493	C([C@H]([C@H]([C@@H]([C@H](C(=O)O)O)O)O)O)OP(=O)(O)O	[M-H]	145.2	Organic oxygen compounds	Organooxygen compounds	Carbohydrates and carbohydrate conjugates	20190304JAP_CCSdatabase_final.csv
Sorbitol	C6H14O6	5780	C([C@H]([C@H]([C@@H]([C@H](CO)O)O)O)O)O	[M-H]	131.9	Organic oxygen compounds	Organooxygen compounds	Carbohydrates and carbohydrate conjugates	20190304JAP_CCSdatabase_final.csv
2-Keto-D-gluconic Acid Memicalcium Salt Hydrate	C6H9O7	16217552	C([C@H]([C@H]([C@@H](C(=O)C(=O)[O-])O)O)O)O.C([C@H]([C@H]([C@@H](C(=O)C(=O)[O-])O)O)O)O.O.[Ca+2]	[M-H]	133	Organic oxygen compounds	Organooxygen compounds	Carbohydrates and carbohydrate conjugates	20190304JAP_CCSdatabase_final.csv
D-Fructose-6-phosphate Disodium Salt Hydrate	C6H13O9P	22812950	C([C@H]([C@H]([C@@H](C(=O)CO)O)O)O)OP(=O)([O-])[O-].[Na+].[Na+]	[M-H]	146.1	Organic oxygen compounds	Organooxygen compounds	Carbohydrates and carbohydrate conjugates	20190304JAP_CCSdatabase_final.csv
D-Ribulose-5-phosphate Disodium Salt	C5H11O8P	15756092	C([C@H]([C@H](C(=O)CO)O)O)OP(=O)([O-])[O-].[Na+].[Na+]	[M-H]	140.4	Organic oxygen compounds	Organooxygen compounds	Carbohydrates and carbohydrate conjugates	20190304JAP_CCSdatabase_final.csv
D-(-)-3-Phosphoglycerate	C3H7O7P	16219906	C([C@H](C(=O)[O-])O)OP(=O)(O)[O-].[Na+].[Na+]	[M-H]	124.8	Organic oxygen compounds	Organooxygen compounds	Carbohydrates and carbohydrate conjugates	20190304JAP_CCSdatabase_final.csv
Glycerate	C3H6O4	439194	C([C@H](C(=O)O)O)O	[M-H]	112.8	Organic oxygen compounds	Organooxygen compounds	Carbohydrates and carbohydrate conjugates	20190304JAP_CCSdatabase_final.csv
Glucuronate	C6H10O7	24892836	C(=O)[C@@H]([C@H]([C@@H]([C@@H](C(=O)[O-])O)O)O)O.O.[Na+]	[M-H]	131.8	Organic oxygen compounds	Organooxygen compounds	Carbohydrates and carbohydrate conjugates	20190304JAP_CCSdatabase_final.csv
D-Glucuronic Acid	C6H10O7	65041	C(=O)[C@@H]([C@H]([C@@H]([C@@H](C(=O)O)O)O)O)O	[M-H]	133.8	Organic oxygen compounds	Organooxygen compounds	Carbohydrates and carbohydrate conjugates	20190304JAP_CCSdatabase_final.csv
D-Glycerate Calcium Salt Dihydrate	C3H6O4	16219408	C(C(C(=O)[O-])O)O.C(C(C(=O)[O-])O)O.O.O.[Ca+2]	[M-H]	112.8	Organic oxygen compounds	Organooxygen compounds	Carbohydrates and carbohydrate conjugates	20190304JAP_CCSdatabase_final.csv
2-Phospho-DL-glycerate	C3H7O7P	59	C(C(C(=O)O)OP(=O)(O)O)O	[M-H]	124.4	Organic oxygen compounds	Organooxygen compounds	Carbohydrates and carbohydrate conjugates	20190304JAP_CCSdatabase_final.csv
Saccharate	C6H10O8	54606561	C(C(C(C(=O)O)O)O)(C(C(=O)O)O)O.[K+]	[M-H]	133.4	Organic oxygen compounds	Organooxygen compounds	Carbohydrates and carbohydrate conjugates	20190304JAP_CCSdatabase_final.csv
Glucosamine-6-phosphate	C6H14NO8P	16219416	C(C(C(C(C(C=O)N)O)O)O)OP(=O)(O)O.[Na]	[M-H]	148.2	Organic oxygen compounds	Organooxygen compounds	Carbohydrates and carbohydrate conjugates	20190304JAP_CCSdatabase_final.csv
D-Ribose-5-phosphate	C5H11O8P	22646445	C(C(C(C(C=O)O)O)O)OP(=O)([O-])[O-].[Na+].[Na+]	[M-H]	139.4	Organic oxygen compounds	Organooxygen compounds	Carbohydrates and carbohydrate conjugates	20190304JAP_CCSdatabase_final.csv
D-Erythrose-4-phosphate Sodium Salt	C4H9O7P	74764317	C(C(C(C=O)O)O)OP(=O)(O)[O-].[Na+]	[M-H]	148.7	Organic oxygen compounds	Organooxygen compounds	Carbohydrates and carbohydrate conjugates	20190304JAP_CCSdatabase_final.csv
D-Glucose-6-phosphate Sodium Salt	C6H13O9P	16219431	C(C1C(C(C(C(O1)O)O)O)O)OP(=O)(O)O.[K]	[M-H]	146.7	Organic oxygen compounds	Organooxygen compounds	Carbohydrates and carbohydrate conjugates	20190304JAP_CCSdatabase_final.csv
Trehalose-6-phosphate Dipotassium Salt	C12H23O14P	75612980	C(C1C(C(C(C(O1)OC2C(C(C(C(O2)COP(=O)([O-])[O-])O)O)O)O)O)O)O.[K+].[K+]	[M-H]	180.9	Organic oxygen compounds	Organooxygen compounds	Carbohydrates and carbohydrate conjugates	20190304JAP_CCSdatabase_final.csv
Deoxycytidine Diphosphate	C9H15N3O10P2	71315445	C1[C@@H]([C@H](O[C@H]1N2C=CC(=NC2=O)N)COP(=O)([O-])OP(=O)([O-])[O-])O.[Na+].[Na+].[Na+]	[M-H]	174	Organic oxygen compounds	Organic oxoanionic compounds	Organic pyrophosphates	20190304JAP_CCSdatabase_final.csv
Shikimic Acid	C7H10O5	8742	C1[C@H]([C@@H]([C@@H](C=C1C(=O)O)O)O)O	[M-H]	137.7	Organic oxygen compounds	Organooxygen compounds	Alcohols and polyols	20190304JAP_CCSdatabase_final.csv
Xylobiose	C10H18O9	439538	C1[C@H]([C@@H]([C@H]([C@@H](O1)O[C@@H]2COC([C@@H]([C@H]2O)O)O)O)O)O	[M-H]	166.4	Organic oxygen compounds	Organooxygen compounds	Carbohydrates and carbohydrate conjugates	20190304JAP_CCSdatabase_final.csv
3-Dehydroshikimate	C7H8O5	439774	C1[C@H]([C@@H](C(=O)C=C1C(=O)O)O)O	[M-H]	132.2	Organic oxygen compounds	Organooxygen compounds	Alcohols and polyols	20190304JAP_CCSdatabase_final.csv
4-Hydroxybenzoate	C7H6O2	126	C1=CC(=CC=C1C=O)O	[M-H]	121.6	Organic oxygen compounds	Organooxygen compounds	Carbonyl compounds	20190304JAP_CCSdatabase_final.csv
L-Kynurenine	C10H12N2O3	161166	C1=CC=C(C(=C1)C(=O)C[C@@H](C(=O)O)N)N	[M+H]	149.8	Organic oxygen compounds	Organooxygen compounds	Carbonyl compounds	20190304JAP_CCSdatabase_final.csv
3-Hydroxybenzaldehyde	C7H6O2	6998	C1=CC=C(C(=C1)C=O)O	[M-H]	118.7	Organic oxygen compounds	Organooxygen compounds	Carbonyl compounds	20190304JAP_CCSdatabase_final.csv
Cytidine-3'-phosphate	C9H14N3O8P	66535	C1=CN(C(=O)N=C1N)[C@H]2[C@@H]([C@@H]([C@H](O2)CO)OP(=O)(O)O)O	[M-H]	169.8	Organic oxygen compounds	Organooxygen compounds	Carbohydrates and carbohydrate conjugates	20190304JAP_CCSdatabase_final.csv
Cytidine-5'-triphosphate	C9H16N3O14P3	16219084	C1=CN(C(=O)N=C1N)[C@H]2[C@@H]([C@@H]([C@H](O2)COP(=O)([O-])OP(=O)(O)OP(=O)(O)[O-])O)O.[Na+].[Na+]	[M-H]	185.6	Organic oxygen compounds	Organooxygen compounds	Carbohydrates and carbohydrate conjugates	20190304JAP_CCSdatabase_final.csv
2-Acetamindo-2-deoxy-beta-D-glycosylamine	C8H16N2O5	439454	CC(=O)N[C@@H]1[C@H]([C@@H]([C@H](O[C@H]1N)CO)O)O	[M-H]	155.3	Organic oxygen compounds	Organooxygen compounds	Carbohydrates and carbohydrate conjugates	20190304JAP_CCSdatabase_final.csv
N-Acetyl-D-glucosamine	C8H15NO6	24139	CC(=O)N[C@@H]1[C@H]([C@@H]([C@H](O[C@H]1O)CO)O)O	[M-H]	153.1	Organic oxygen compounds	Organooxygen compounds	Carbohydrates and carbohydrate conjugates	20190304JAP_CCSdatabase_final.csv
N-Acetylneuraminate	C11H19NO9	445063	CC(=O)N[C@@H]1[C@H](C[C@](O[C@H]1[C@@H]([C@@H](CO)O)O)(C(=O)O)O)O	[M-H]	158.4	Organic oxygen compounds	Organooxygen compounds	Carbohydrates and carbohydrate conjugates	20190304JAP_CCSdatabase_final.csv
Calcium Pantothenate	C18H32CaN2O10	443753	CC(C)(CO)[C@H](C(=O)NCCC(=O)[O-])O.CC(C)(CO)[C@H](C(=O)NCCC(=O)[O-])O.[Ca+2]	[M+H]	203	Organic oxygen compounds	Organooxygen compounds	Alcohols and polyols	20190304JAP_CCSdatabase_final.csv
Pantothenate	C9H17NO5	6613	CC(C)(CO)[C@H](C(=O)NCCC(=O)O)O	[M-H]	146.6	Organic oxygen compounds	Organooxygen compounds	Alcohols and polyols	20190304JAP_CCSdatabase_final.csv
Clarithromycin	C38H69NO13	84029	CC[C@@H]1[C@@]([C@@H]([C@H](C(=O)[C@@H](C[C@@]([C@@H]([C@H]([C@@H]([C@H](C(=O)O1)C)O[C@H]2C[C@@]([C@H]([C@@H](O2)C)O)(C)OC)C)O[C@H]3[C@@H]([C@H](C[C@H](O3)C)N(C)C)O)(C)OC)C)C)O)(C)O	[M+H]	266.7	Organic oxygen compounds	Organooxygen compounds	Carbohydrates and carbohydrate conjugates	20190304JAP_CCSdatabase_final.csv
6-Phosphogluconate	C6H13O10P	795540	CC1=CC(=CC=C1)OCC(=O)NC2=C(C=CC(=C2)Cl)C	[M-H]	143.7	Organic oxygen compounds	Organooxygen compounds	Carbohydrates and carbohydrate conjugates	20190304JAP_CCSdatabase_final.csv
D-Glucose-6-phosphate Sodium Salt	C6H13O9P	98867	COC1=CC=CC(=C1[N+](=O)[O-])C=O	[M-H]	149.4	Organic oxygen compounds	Organooxygen compounds	Carbohydrates and carbohydrate conjugates	20190304JAP_CCSdatabase_final.csv
Citicoline	C14H26N4O11P2	36605	C[N+](C)(C)CCOP(=O)([O-])OP(=O)([O-])OC[C@@H]1[C@H]([C@H]([C@@H](O1)N2C=CC(=NC2=O)N)O)O.[Na+]	[M-H]	205.9	Organic oxygen compounds	Pyrimidine nucleotides	Pyrimidine ribonucleotides	20190304JAP_CCSdatabase_final.csv
Cytidine-5'-diphosphocholine	C14H26N4O11P2	13804	C[N+](C)(C)CCOP(=O)([O-])OP(=O)(O)OC[C@@H]1[C@H]([C@H]([C@@H](O1)N2C=CC(=NC2=O)N)O)O	[M-H]	207.7	Organic oxygen compounds	Pyrimidine nucleotides	Pyrimidine ribonucleotides	20190304JAP_CCSdatabase_final.csv
Deoxycytidine	C9H13N3O4	13711	C1[C@@H]([C@H](O[C@H]1N2C=CC(=NC2=O)N)CO)O	[M-H]	149.1	Organic oxygen compounds	Pyrimidine nucleosides	Pyrimidine 2'-deoxyribonucleosides	20190304JAP_CCSdatabase_final.csv
2'-Deoxycytidine-5-monophosphate	C9H14N3O7P	13945	C1[C@@H]([C@H](O[C@H]1N2C=CC(=NC2=O)N)COP(=O)(O)O)O	[M-H]	163.7	Organic oxygen compounds	Pyrimidine nucleotides	Pyrimidine deoxyribonucleotides	20190304JAP_CCSdatabase_final.csv
Deoxyuridine Monophosphate	C9H13N2O8P	13957223	C1[C@@H]([C@H](O[C@H]1N2C=CC(=O)NC2=O)COP(=O)([O-])[O-])O.[Na+].[Na+]	[M-H]	159.2	Organic oxygen compounds	Pyrimidine nucleotides	Pyrimidine deoxyribonucleotides	20190304JAP_CCSdatabase_final.csv
Deoxyuridine Triphosphate	C9H15N2O14P3	65070	C1[C@@H]([C@H](O[C@H]1N2C=CC(=O)NC2=O)COP(=O)(O)OP(=O)(O)OP(=O)(O)O)O	[M-H]	178.5	Organic oxygen compounds	Pyrimidine nucleotides	Pyrimidine deoxyribonucleotides	20190304JAP_CCSdatabase_final.csv
Cyclic-AMP Sodium Salt Monohydrate	C10H12N5O6P	216877	C1[C@@H]2[C@H]([C@H]([C@@H](O2)N3C=NC4=C(N=CN=C43)N)O)OP(=O)(O1)[O-].[Na+]	[M-H]	171.9	Organic oxygen compounds	Purine nucleotides	Cyclic purine nucleotides	20190304JAP_CCSdatabase_final.csv
Cyclic-AMP	C10H12N5O6P	6076	C1[C@@H]2[C@H]([C@H]([C@@H](O2)N3C=NC4=C(N=CN=C43)N)O)OP(=O)(O1)O	[M-H]	171.9	Organic oxygen compounds	Purine nucleotides	Cyclic purine nucleotides	20190304JAP_CCSdatabase_final.csv
beta-Nicotinamide Adenine Dinucleotide	C21H27N7O14P2	5893	C1=CC(=C[N+](=C1)[C@H]2[C@@H]([C@@H]([C@H](O2)COP(=O)(O)OP(=O)(O)OC[C@@H]3[C@H]([C@H]([C@@H](O3)N4C=NC5=C(N=CN=C54)N)O)O)O)O)C(=O)N	[M-H]	225.2	Organoheterocyclic compounds	(5'->5')-dinucleotides		20190304JAP_CCSdatabase_final.csv
alpha-Nicotinamide Adenine Dinucleotide Sacchatomyces Cerevisiae	C21H27N7O14P2	925	C1=CC(=C[N+](=C1)C2C(C(C(O2)COP(=O)([O-])OP(=O)(O)OCC3C(C(C(O3)N4C=NC5=C(N=CN=C54)N)O)O)O)O)C(=O)N	[M-H]	226.4	Organoheterocyclic compounds	(5'->5')-dinucleotides		20190304JAP_CCSdatabase_final.csv
Cytidine	C9H13N3O5	6175	C1=CN(C(=O)N=C1N)[C@H]2[C@@H]([C@@H]([C@H](O2)CO)O)O	[M-H]	150	Organic oxygen compounds	Pyrimidine nucleosides		20190304JAP_CCSdatabase_final.csv
Cytidine-5'-monophosphate	C9H14N3O8P	6131	C1=CN(C(=O)N=C1N)[C@H]2[C@@H]([C@@H]([C@H](O2)COP(=O)(O)O)O)O	[M-H]	165.1	Organic oxygen compounds	Pyrimidine nucleotides	Pyrimidine ribonucleotides	20190304JAP_CCSdatabase_final.csv
Cytidine Diphosphate	C9H15N3O11P2	6132	C1=CN(C(=O)N=C1N)[C@H]2[C@@H]([C@@H]([C@H](O2)COP(=O)(O)OP(=O)(O)O)O)O	[M-H]	174.2	Organic oxygen compounds	Pyrimidine nucleotides	Pyrimidine ribonucleotides	20190304JAP_CCSdatabase_final.csv
Cytidine Diphosphate Ethanolamine	C11H20N4O11P2	123727	C1=CN(C(=O)N=C1N)[C@H]2[C@@H]([C@@H]([C@H](O2)COP(=O)(O)OP(=O)(O)OCCN)O)O	[M-H]	188.1	Organic oxygen compounds	Pyrimidine nucleotides	Pyrimidine ribonucleotides	20190304JAP_CCSdatabase_final.csv
Cytidine-2',3'-Cyclic Phosphate	C9H12N3O7P	417654	C1=CN(C(=O)N=C1N)C2C3C(C(O2)CO)OP(=O)(O3)O	[M-H]	164.6	Organic oxygen compounds	Pyrimidine nucleotides	Cyclic pyrimidine nucleotides	20190304JAP_CCSdatabase_final.csv
Uridine Diphosphogalactose	C15H24N2O17P2	56845789	C1=CN(C(=O)NC1=O)[C@@H]2[C@H]([C@H]([C@@H](O2)COP(=O)([O-])OP(=O)([O-])O[C@H]3[C@H]([C@@H]([C@@H]([C@@H](O3)CO)O)O)O)O)O.[Na+].[Na+]	[M-H]	207.3	Organic oxygen compounds	Pyrimidine nucleotides	Pyrimidine nucleotide sugars	20190304JAP_CCSdatabase_final.csv
Uridine	C9H12N2O6	6029	C1=CN(C(=O)NC1=O)[C@H]2[C@@H]([C@@H]([C@H](O2)CO)O)O	[M-H]	152	Organic oxygen compounds	Pyrimidine nucleosides		20190304JAP_CCSdatabase_final.csv
Uridine Diphosphate Glucuronic Acid	C15H22N2O18P2	16220076	C1=CN(C(=O)NC1=O)[C@H]2[C@@H]([C@@H]([C@H](O2)COP(=O)([O-])OP(=O)([O-])O[C@@H]3[C@@H]([C@H]([C@@H]([C@H](O3)C(=O)[O-])O)O)O)O)O.[Na+].[Na+].[Na+]	[M-H]	211.9	Organic oxygen compounds	Pyrimidine nucleotides	Pyrimidine nucleotide sugars	20190304JAP_CCSdatabase_final.csv
Uridine Triphosphate	C9H15N2O15P3	88265	C1=CN(C(=O)NC1=O)[C@H]2[C@@H]([C@@H]([C@H](O2)COP(=O)([O-])OP(=O)([O-])OP(=O)(O)[O-])O)O.[Na+].[Na+].[Na+]	[M-H]	180.1	Organic oxygen compounds	Pyrimidine nucleotides	Pyrimidine ribonucleotides	20190304JAP_CCSdatabase_final.csv
Uridine-5'-diphosphate	C9H14N2O12P2	11957711	C1=CN(C(=O)NC1=O)[C@H]2[C@@H]([C@@H]([C@H](O2)COP(=O)([O-])OP(=O)(O)[O-])O)O.[Na+].[Na+]	[M-H]	172.9	Organic oxygen compounds	Pyrimidine nucleotides	Pyrimidine ribonucleotides	20190304JAP_CCSdatabase_final.csv
Uridine-5'-Monophosphate	C9H13N2O9P	6030	C1=CN(C(=O)NC1=O)[C@H]2[C@@H]([C@@H]([C@H](O2)COP(=O)(O)O)O)O	[M-H]	162.3	Organic oxygen compounds	Pyrimidine nucleotides	Pyrimidine ribonucleotides	20190304JAP_CCSdatabase_final.csv
Uridine Diphosphate Glucose	C15H24N2O17P2	8629	C1=CN(C(=O)NC1=O)[C@H]2[C@@H]([C@@H]([C@H](O2)COP(=O)(O)OP(=O)(O)O[C@@H]3[C@@H]([C@H]([C@@H]([C@H](O3)CO)O)O)O)O)O	[M-H]	207.3	Organic oxygen compounds	Pyrimidine nucleotides	Pyrimidine nucleotide sugars	20190304JAP_CCSdatabase_final.csv
Uridine Triphosphate	C9H15N2O15P3	71308627	C1=CN(C(=O)NC1=O)[C@H]2[C@@H]([C@@H]([C@H](O2)COP(=O)(O)OP(=O)(O)OP(=O)(O)O)O)O.C(C(CO)(CO)N)O	[M-H]	180.1	Organic oxygen compounds	Pyrimidine nucleotides	Pyrimidine ribonucleotides	20190304JAP_CCSdatabase_final.csv
Adenosine-5'-diphosphoglucose Disodium Salt	C16H25N5O15P2	16218834	C1=NC(=C2C(=N1)N(C=N2)[C@H]3[C@@H]([C@@H]([C@H](O3)COP(=O)([O-])OP(=O)([O-])OC4[C@@H]([C@H]([C@@H]([C@H](O4)CO)O)O)O)O)O)N.[Na+].[Na+]	[M-H]	217.8	Organic oxygen compounds	Purine nucleotides	Purine nucleotide sugars	20190304JAP_CCSdatabase_final.csv
Adenosine-5'-diphosphate (From Bacterial Source)	C10H15N5O10P2	6022	C1=NC(=C2C(=N1)N(C=N2)[C@H]3[C@@H]([C@@H]([C@H](O3)COP(=O)(O)OP(=O)(O)O)O)O)N	[M-H]	184.8	Organic oxygen compounds	Purine nucleotides	Purine ribonucleotides	20190304JAP_CCSdatabase_final.csv
Adenosine-5'-triphosphate	C10H16N5O13P3	5957	C1=NC(=C2C(=N1)N(C=N2)[C@H]3[C@@H]([C@@H]([C@H](O3)COP(=O)(O)OP(=O)(O)OP(=O)(O)O)O)O)N	[M-H]	188.3	Organic oxygen compounds	Purine nucleotides	Purine ribonucleotides	20190304JAP_CCSdatabase_final.csv
Adenosine Diphosphate Ribose	C15H23N5O14P2	16218837	C1=NC(=C2C(=N1)N(C=N2)C3C(C(C(O3)COP(=O)(O)OP(=O)(O)OCC(C(C(C=O)O)O)O)O)O)N.[Na]	[M-H]	202.1	Organic oxygen compounds	Purine nucleotides	Purine nucleotide sugars	20190304JAP_CCSdatabase_final.csv
Inosine Triphosphate	C10H15N4O14P3	53486218	C1=NC(=O)C2=C(N1)N(C=N2)[C@H]3[C@@H]([C@@H]([C@H](O3)COP(=O)([O-])OP(=O)([O-])OP(=O)(O)[O-])O)O.[Na+].[Na+].[Na+]	[M-H]	189.2	Organic oxygen compounds	Purine nucleotides	Purine ribonucleotides	20190304JAP_CCSdatabase_final.csv
Uridine Diphosphate-N-Acetylglucosamine	C17H27N3O17P2	16069658	CC(=O)N[C@@H]1[C@H]([C@@H]([C@H](O[C@@H]1OP(=O)([O-])OP(=O)([O-])OC[C@@H]2[C@H]([C@H]([C@@H](O2)N3C=CC(=O)NC3=O)O)O)CO)O)O.[Na+].[Na+]	[M-H]	223.9	Organic oxygen compounds	Pyrimidine nucleotides	Pyrimidine nucleotide sugars	20190304JAP_CCSdatabase_final.csv
Uridine Diphosphate-N-Acetylgalactosamine	C17H27N3O17P2	16220073	CC(=O)N[C@@H]1[C@H]([C@H]([C@H](OC1OP(=O)([O-])OP(=O)([O-])OC[C@@H]2[C@H]([C@H](C(O2)N3C=CC(=O)NC3=O)O)O)CO)O)O.[Na+].[Na+]	[M-H]	223.9	Organic oxygen compounds	Pyrimidine nucleotides	Pyrimidine nucleotide sugars	20190304JAP_CCSdatabase_final.csv
5-Methylcytidine	C10H15N3O5	92918	CC1=CN(C(=O)N=C1N)[C@H]2[C@@H]([C@@H]([C@H](O2)CO)O)O	[M-H]	159.9	Organic oxygen compounds	Pyrimidine nucleosides		20190304JAP_CCSdatabase_final.csv
Thymidine-5'-monophosphate	C10H15N2O8P	153672	CC1=CN(C(=O)NC1=O)[C@H]2C[C@@H]([C@H](O2)COP(=O)([O-])[O-])O.[Na+].[Na+]	[M-H]	163.8	Organic oxygen compounds	Pyrimidine nucleotides	Pyrimidine deoxyribonucleotides	20190304JAP_CCSdatabase_final.csv
Deoxythymidine-diphosphate-D-Glucose	C16H26N2O16P2	71308773	CC1=CN(C(=O)NC1=O)[C@H]2C[C@@H]([C@H](O2)COP(=O)([O-])OP(=O)([O-])O[C@@H]3[C@@H]([C@H]([C@@H]([C@H](O3)CO)O)O)O)O.[Na+].[Na+]	[M-H]	209.5	Organic oxygen compounds	Pyrimidine nucleotides	Pyrimidine nucleotide sugars	20190304JAP_CCSdatabase_final.csv
Thymidine Monophosphate	C10H15N2O8P	9700	CC1=CN(C(=O)NC1=O)[C@H]2C[C@@H]([C@H](O2)COP(=O)(O)O)O	[M-H]	163.1	Organic oxygen compounds	Pyrimidine nucleotides	Pyrimidine deoxyribonucleotides	20190304JAP_CCSdatabase_final.csv
D-Lactose	C12H22O11	440995	C([C@@H]1[C@@H]([C@@H]([C@H]([C@@H](O1)O[C@@H]2[C@H](OC([C@@H]([C@H]2O)O)O)CO)O)O)O)O	[M-H]-	170.2333333	Organic oxygen compounds	Sugars		metabolitedata.csv
Mannohexaose	C36H62O31	71761996	C([C@@H]1[C@H]([C@@H]([C@@H]([C@@H](O1)O[C@@H]2[C@H](O[C@H]([C@H]([C@H]2O)O)O[C@@H]3[C@H](O[C@H]([C@H]([C@H]3O)O)O[C@@H]4[C@H](O[C@H]([C@H]([C@H]4O)O)O[C@@H]5[C@H](O[C@H]([C@H]([C@H]5O)O)O[C@@H]6[C@H](OC([C@H]([C@H]6O)O)O)CO)CO)CO)CO)CO)O)O)O)O	[M-H]-	277.2666667	Organic oxygen compounds	Sugars		metabolitedata.csv
Mannotetraose	C24H42O21	3082008	C([C@@H]1[C@H]([C@@H]([C@@H]([C@H](O1)O[C@H]2[C@@H]([C@H](O[C@@H]([C@H]2O[C@@H]3[C@H]([C@H]([C@@H]([C@H](O3)CO)O)O)O)O[C@@H]4[C@H]([C@H]([C@@H]([C@H](O4)CO)O)O)O)CO)O)O)O)O)O	[M-H]-	223.2603421	Organic oxygen compounds	Sugars		metabolitedata.csv
3-alpha,6-alpha-Mannopentaose	C30H52O26	71308662	C([C@@H]1[C@H]([C@@H]([C@@H]([C@H](O1)OC[C@@H]2[C@H]([C@@H]([C@@H]([C@H](O2)OC[C@H]([C@H]([C@@H]([C@@H](C=O)O)O[C@@H]3[C@H]([C@H]([C@@H]([C@H](O3)CO)O)O)O)O)O)O)O[C@@H]4[C@H]([C@H]([C@@H]([C@H](O4)CO)O)O)O)O)O)O)O)O	[M-H]-	252.1481258	Organic oxygen compounds	Sugars		metabolitedata.csv
Fructose 1,6 Bisphosphate	C6H14O12P2	10267	C([C@@H]1[C@H]([C@@H]([C@](O1)(COP(=O)(O)O)O)O)O)OP(=O)(O)O	[M-H]-	157.5087974	Organic oxygen compounds	Sugars		metabolitedata.csv
Cellopentaose	C30H52O26	440949	C([C@@H]1[C@H]([C@@H]([C@H]([C@@H](O1)O[C@@H]2[C@H](O[C@H]([C@@H]([C@H]2O)O)O[C@@H]3[C@H](O[C@H]([C@@H]([C@H]3O)O)O[C@@H]4[C@H](O[C@H]([C@@H]([C@H]4O)O)O[C@@H]5[C@H](O[C@H]([C@@H]([C@H]5O)O)O)CO)CO)CO)CO)O)O)O)O	[M-H]-	247.2888119	Organic oxygen compounds	Sugars		metabolitedata.csv
Cellohexaose	C36H62O31	440948	C([C@@H]1[C@H]([C@@H]([C@H]([C@@H](O1)O[C@@H]2[C@H](O[C@H]([C@@H]([C@H]2O)O)O[C@@H]3[C@H](O[C@H]([C@@H]([C@H]3O)O)O[C@@H]4[C@H](O[C@H]([C@@H]([C@H]4O)O)O[C@@H]5[C@H](O[C@H]([C@@H]([C@H]5O)O)O[C@@H]6[C@H](O[C@H]([C@@H]([C@H]6O)O)O)CO)CO)CO)CO)CO)O)O)O)O	[M-H]-	286.2	Organic oxygen compounds	Sugars		metabolitedata.csv
Cellotetraose	C24H42O21	439626	C([C@@H]1[C@H]([C@@H]([C@H]([C@@H](O1)O[C@@H]2[C@H](O[C@H]([C@@H]([C@H]2O)O)O[C@@H]3[C@H](O[C@H]([C@@H]([C@H]3O)O)O[C@@H]4[C@H](OC([C@@H]([C@H]4O)O)O)CO)CO)CO)O)O)O)O	[M-H]-	194.7411961	Organic oxygen compounds	Sugars		metabolitedata.csv
Cellotriose	C18H32O16	5287993	C([C@@H]1[C@H]([C@@H]([C@H]([C@@H](O1)O[C@@H]2[C@H](O[C@H]([C@@H]([C@H]2O)O)O[C@@H]3[C@H](OC([C@@H]([C@H]3O)O)O)CO)CO)O)O)O)O	[M-H]-	208.3807877	Organic oxygen compounds	Sugars		metabolitedata.csv
Cellobiose	C12H22O11	439178	C([C@@H]1[C@H]([C@@H]([C@H]([C@@H](O1)O[C@@H]2[C@H](OC([C@@H]([C@H]2O)O)O)CO)O)O)O)O	[M-H]-	167.864163	Organic oxygen compounds	Sugars		metabolitedata.csv
Trehalose 6-Phosphate	C12H23O14P	122336	C([C@@H]1[C@H]([C@@H]([C@H]([C@H](O1)O[C@@H]2[C@@H]([C@H]([C@@H]([C@H](O2)COP(=O)(O)O)O)O)O)O)O)O)O	[M-H]-	181.5372671	Organic oxygen compounds	Sugars		metabolitedata.csv
Maltotetraose	C24H42O21	446495	C([C@@H]1[C@H]([C@@H]([C@H]([C@H](O1)O[C@@H]2[C@H](O[C@@H]([C@@H]([C@H]2O)O)O[C@@H]3[C@H](O[C@@H]([C@@H]([C@H]3O)O)O[C@@H]4[C@H](O[C@@H]([C@@H]([C@H]4O)O)O)CO)CO)CO)O)O)O)O	[M-H]-	221.082029	Organic oxygen compounds	Sugars		metabolitedata.csv
Maltohexaose	C36H62O31	439606	C([C@@H]1[C@H]([C@@H]([C@H]([C@H](O1)O[C@@H]2[C@H](O[C@@H]([C@@H]([C@H]2O)O)O[C@@H]3[C@H](O[C@@H]([C@@H]([C@H]3O)O)O[C@@H]4[C@H](O[C@@H]([C@@H]([C@H]4O)O)O[C@@H]5[C@H](O[C@@H]([C@@H]([C@H]5O)O)O[C@@H]6[C@H](OC([C@@H]([C@H]6O)O)O)CO)CO)CO)CO)CO)O)O)O)O	[M-H]-	279.9666667	Organic oxygen compounds	Sugars		metabolitedata.csv
Maltotriose	C18H32O16	439586	C([C@@H]1[C@H]([C@@H]([C@H]([C@H](O1)O[C@@H]2[C@H](O[C@@H]([C@@H]([C@H]2O)O)O[C@@H]3[C@H](OC([C@@H]([C@H]3O)O)O)CO)CO)O)O)O)O	[M-H]-	213.005514	Organic oxygen compounds	Sugars		metabolitedata.csv
Melezitose	C18H32O16	92817	C([C@@H]1[C@H]([C@@H]([C@H]([C@H](O1)O[C@H]2[C@@H]([C@H](O[C@@]2(CO)O[C@@H]3[C@@H]([C@H]([C@@H]([C@H](O3)CO)O)O)O)CO)O)O)O)O)O	[M-H]-	203.5214737	Organic oxygen compounds	Sugars		metabolitedata.csv
Isomaltotriose	C18H32O16	439668	C([C@@H]1[C@H]([C@@H]([C@H]([C@H](O1)OC[C@@H]2[C@H]([C@@H]([C@H]([C@H](O2)OC[C@@H]3[C@H]([C@@H]([C@H](C(O3)O)O)O)O)O)O)O)O)O)O)O	[M-H]-	202.9182485	Organic oxygen compounds	Sugars		metabolitedata.csv
Palatinose	C12H22O11	439559	C([C@@H]1[C@H]([C@@H]([C@H]([C@H](O1)OC[C@@H]2[C@H]([C@@H](C(O2)(CO)O)O)O)O)O)O)O	[M-H]-	172.6	Organic oxygen compounds	Sugars		metabolitedata.csv
Fructose-6-phosphate	C6H13O9P	91746169	C([C@@H]1C([C@@H]([C@@](O1)(CO)O)O)O)OP(=O)(O)O	[M-H]-	148.024757	Organic oxygen compounds	Sugars		metabolitedata.csv
D-Xylulose 5-Phosphate	C5H11O8P	441187	C([C@H]([C@@H]([C@H](C=O)O)O)O)OP(=O)(O)O	[M-H]-	139.3	Organic oxygen compounds	Sugars		metabolitedata.csv
Fructose-1-phosphate	C6H13O9P	65246	C([C@H]([C@H]([C@@H](C(=O)COP(=O)(O)O)O)O)O)O	[M-H]-	146.8	Organic oxygen compounds	Sugars		metabolitedata.csv
D-Ribose 5-Phosphate	C5H11O8P	77982	C([C@H]([C@H]([C@H](C=O)O)O)O)OP(=O)(O)O	[M-H]-	141.6573801	Organic oxygen compounds	Sugars		metabolitedata.csv
D-Ribulose 5-Phosphate	C5H11O8P	439184	C([C@H]([C@H](C(=O)CO)O)O)OP(=O)(O)O	[M-H]-	140.8530798	Organic oxygen compounds	Sugars		metabolitedata.csv
D-Erythrose 4-Phosphate	C4H9O7P	122357	C([C@H]([C@H](C=O)O)O)OP(=O)(O)O	[M-H]-	149.1641823	Organic oxygen compounds	Sugars		metabolitedata.csv
Maltulose	C12H22O11	3872	C(C1C(C(C(C(O1)OC2C(OC(C2O)(CO)O)CO)O)O)O)O	[M-H]-	180.5989168	Organic oxygen compounds	Sugars		metabolitedata.csv
Lacto-N-Tetraose (LNT)	C26H45NO21	440993	CC(=O)N[C@@H]1[C@H]([C@@H]([C@H](O[C@H]1O[C@H]2[C@H]([C@H](O[C@H]([C@@H]2O)O[C@@H]3[C@H](OC([C@@H]([C@H]3O)O)O)CO)CO)O)CO)O)O[C@H]4[C@@H]([C@H]([C@H]([C@H](O4)CO)O)O)O	[M-H]-	240.8879224	Organic oxygen compounds	Sugars		metabolitedata.csv
Lacto-N-Neotetraose (LNnT)	C26H45NO21	9831622	CC(=O)N[C@@H]1[C@H]([C@@H]([C@H](O[C@H]1O[C@H]2[C@H]([C@H](O[C@H]([C@@H]2O)O[C@@H]3[C@H](OC([C@@H]([C@H]3O)O)O)CO)CO)O)CO)O[C@H]4[C@@H]([C@H]([C@H]([C@H](O4)CO)O)O)O)O	[M-H]-	254.7285891	Organic oxygen compounds	Sugars		metabolitedata.csv
Lacto-N-neohexaose (LNnH)	C40H68N2O31	46878594	CC(=O)N[C@@H]1[C@H]([C@@H]([C@H](O[C@H]1OC[C@@H]2[C@@H]([C@@H]([C@H]([C@@H](O2)O[C@@H]3[C@H](OC([C@@H]([C@H]3O)O)O)CO)O)O[C@H]4[C@@H]([C@H]([C@@H]([C@H](O4)CO)O[C@H]5[C@@H]([C@H]([C@H]([C@H](O5)CO)O)O)O)O)NC(=O)C)O)CO)O[C@H]6[C@@H]([C@H]([C@H]([C@H](O6)CO)O)O)O)O	[M-H]-	320.5	Organic oxygen compounds	Sugars		metabolitedata.csv
ÃÂÃÂ±-Nicotinamide Adenine Dinucleotide (ÃÂÃÂ±-NAD+)	C21H27N7O14P2	16219771	C1=CC(=C[N+](=C1)[C@@H]2[C@@H]([C@@H]([C@H](O2)COP(=O)([O-])OP(=O)(O)OC[C@@H]3[C@H]([C@H]([C@@H](O3)N4C=NC5=C(N=CN=C54)N)O)O)O)O)C(=O)N	[M+H]	241.9268102	Organic oxygen compounds	Nucleotides		metabolitedata.csv
Cytidine 5' Triphosphate	C9H16N3O14P3	6176	C1=CN(C(=O)N=C1N)[C@H]2[C@@H]([C@@H]([C@H](O2)COP(=O)(O)OP(=O)(O)OP(=O)(O)O)O)O	[M-H]-	192.1607328	Organic oxygen compounds	Nucleotides		metabolitedata.csv
Adenosine 5' Diphosphoglucose	C16H25N5O15P2	16500	C1=NC(=C2C(=N1)N(C=N2)[C@H]3[C@@H]([C@@H]([C@H](O3)COP(=O)(O)OP(=O)(O)O[C@@H]4[C@@H]([C@H]([C@@H]([C@H](O4)CO)O)O)O)O)O)N	[M+H]	218.3004906	Organic oxygen compounds	Nucleotides		metabolitedata.csv
Adenosine-5'-Diphosphoribose	C15H23N5O14P2	447048	C1=NC(=C2C(=N1)N(C=N2)[C@H]3[C@@H]([C@@H]([C@H](O3)COP(=O)(O)OP(=O)(O)OC[C@@H]4[C@H]([C@H]([C@H](O4)O)O)O)O)O)N	[M-H]-	205	Organic oxygen compounds	Nucleotides		metabolitedata.csv
Calcium Pantothenate	C18H32CaN2O10	11306073	CC(C)(CO)[C@H](C(=O)NCCC(=O)[O-])O.CC(C)(CO)[C@H](C(=O)NCCC(=O)[O-])O.[Ca+2]	[M+H]	204.2587489	Organic oxygen compounds	Vitamins		metabolitedata.csv
D-Glucosamine	C6H13NO5	439213	C([C@@H]1[C@H]([C@@H]([C@H](C(O1)O)N)O)O)O	[M+H]	135.5916158	Organic oxygen compounds			metabolitedata.csv
Xylitol	C5H12O5	6912	C([C@H](C([C@H](CO)O)O)O)O	[M-H]-	127.917251	Organic oxygen compounds	Phenolics		metabolitedata.csv
2-(ÃÂÃÂ²-Glucosyl)glycerol	C9H18O8	57369524	C(C1[C@@H](C(C([C@@H](O1)OC(CO)CO)O)O)O)O	[M-H]-	157.2666667	Organic oxygen compounds			metabolitedata.csv
Deoxyuridine	C9H12N2O5	13712	C1[C@@H]([C@H](O[C@H]1N2C=CC(=O)NC2=O)CO)O	[M-H]	150	Organic oxygen compounds	Pyrimidine nucleosides	Pyrimidine 2'-deoxyribonucleosides	20190304JAP_CCSdatabase_final.csv
Aicar	C9H15N4O8P	65110	C1=NC(=C(N1[C@H]2[C@@H]([C@@H]([C@H](O2)COP(=O)(O)O)O)O)N)C(=O)N	[M-H]	170.5	Organic oxygen compounds	Imidazole ribonucleosides and ribonucleotides	1-ribosyl-imidazolecarboxamides	20190304JAP_CCSdatabase_final.csv
Thymidine	C10H14N2O5	5789	CC1=CN(C(=O)NC1=O)[C@H]2C[C@@H]([C@H](O2)CO)O	[M-H]	154.2	Organic oxygen compounds	Pyrimidine nucleosides	Pyrimidine 2'-deoxyribonucleosides	20190304JAP_CCSdatabase_final.csv
Lacto-N-Fucopentaose 1 (LNFP 1)	C32H55NO25	16219579	C[C@H]1[C@H]([C@H]([C@@H]([C@@H](O1)O[C@@H]2[C@H]([C@H]([C@H](O[C@H]2O[C@@H]3[C@H]([C@@H](O[C@@H]([C@H]3O)CO)O[C@H]4[C@H]([C@H](O[C@H]([C@@H]4O)O[C@H]([C@@H](CO)O)[C@@H]([C@H](C=O)O)O)CO)O)NC(=O)C)CO)O)O)O)O)O	[M-H]-	275.8749829	Organic oxygen compounds	Sugars		metabolitedata.csv
Lacto-N-Fucopentaose 2 (LNFP 2)	C32H55NO25	168012	C[C@H]1[C@H]([C@H]([C@@H]([C@@H](O1)O[C@@H]2[C@H](O[C@H]([C@@H]([C@H]2O[C@H]3[C@@H]([C@H]([C@H]([C@H](O3)CO)O)O)O)NC(=O)C)O[C@H]4[C@H]([C@H](O[C@H]([C@@H]4O)O[C@H]([C@@H](CO)O)[C@@H]([C@H](C=O)O)O)CO)O)CO)O)O)O	[M-H]-	274.2663825	Organic oxygen compounds	Sugars		metabolitedata.csv
Lacto-N-hexaose(LNH)	C40H68N2O31	92132303	CC(=O)N[C@@H]1[C@H]([C@@H]([C@H](OC1OC[C@@H]2[C@H](C([C@H]([C@@H](O2)OC([C@@H](CO)O)[C@H]([C@H](C=O)O)O)O)O[C@H]3C([C@H]([C@@H]([C@H](O3)CO)O)OC4[C@@H]([C@H]([C@H]([C@H](O4)CO)O)O)O)NC(=O)C)O)CO)O[C@H]5[C@@H]([C@H]([C@H]([C@H](O5)CO)O)O)O)O	[M-H]-	317.6	Organic oxygen compounds	Sugars		metabolitedata.csv
Lacto-N-Fucopentaose 3 (LNFP 3)	C32H55NO25	3586141	CC1C(C(C(C(O1)OC2C(C(OC(C2OC3C(C(C(C(O3)CO)O)O)O)CO)OC4C(C(OC(C4O)OC(C(CO)O)C(C(C=O)O)O)CO)O)NC(=O)C)O)O)O	[M-H]-	271.2502566	Organic oxygen compounds	Sugars		metabolitedata.csv
Butyryl trihexyl citrate	C28H50O8	133914	CCCCCCOC(=O)CC(CC(=O)OCCCCCC)(C(=O)OCCCCCC)OC(=O)CCC	[M+H]+	240.45	Organic oxygen compounds			UACCSCEC_ac1c00142_si_002_TS-5.csv
Tributyl acetylcitrate	C20H34O8	6505	CCCCOC(=O)CC(CC(=O)OCCCC)(C(=O)OCCCC)OC(=O)C	[M+H]+	199.82	Organic oxygen compounds			UACCSCEC_ac1c00142_si_002_TS-5.csv
D-Sedoheptulose	C7H14O7	5459879	C([C@H]([C@H]([C@H]([C@@H](C(=O)CO)O)O)O)O)O	[M-H]-	145.5	Organic oxygen compounds	Sugars		metabolitedata.csv
10:2 Fluorotelomer unsaturated carboxylate	C12H2F20O2	138396354	C(=C(C(C(C(C(C(C(C(C(C(F)(F)F)(F)F)(F)F)(F)F)(F)F)(F)F)(F)F)(F)F)(F)F)F)C(=O)O	[M-H]-	189.84	Organic acids and derivatives	PFAS		UACCSCEC_ac1c00142_si_002_TS-5.csv
8:2 Fluorotelomer unsaturated carboxylate	C10H2F16O2	11733192	C(=C(C(C(C(C(C(C(C(F)(F)F)(F)F)(F)F)(F)F)(F)F)(F)F)(F)F)F)C(=O)O	[M-H]-	172.63	Organic acids and derivatives	PFAS		UACCSCEC_ac1c00142_si_002_TS-5.csv
Perfluoro-n-octadecanoic acid	C18HF35O2	167547	C(=O)(C(C(C(C(C(C(C(C(C(C(C(C(C(C(C(C(C(F)(F)F)(F)F)(F)F)(F)F)(F)F)(F)F)(F)F)(F)F)(F)F)(F)F)(F)F)(F)F)(F)F)(F)F)(F)F)(F)F)(F)F)O	[M-H]-	243.53	Organic acids and derivatives	PFAS		UACCSCEC_ac1c00142_si_002_TS-5.csv
Perfluoro-n-hexadecanoic acid	C16HF31O2	106027	C(=O)(C(C(C(C(C(C(C(C(C(C(C(C(C(C(C(F)(F)F)(F)F)(F)F)(F)F)(F)F)(F)F)(F)F)(F)F)(F)F)(F)F)(F)F)(F)F)(F)F)(F)F)(F)F)O	[M-H]-	227.34	Organic acids and derivatives	PFAS		UACCSCEC_ac1c00142_si_002_TS-5.csv
Perfluoro-n-tetradecanoic acid	C14HF27O2	67822	C(=O)(C(C(C(C(C(C(C(C(C(C(C(C(C(F)(F)F)(F)F)(F)F)(F)F)(F)F)(F)F)(F)F)(F)F)(F)F)(F)F)(F)F)(F)F)(F)F)O	[M-H]-	209.91	Organic acids and derivatives	PFAS		UACCSCEC_ac1c00142_si_002_TS-5.csv
Perfluoro-n-tridecanoic acid	C13HF25O2	3018355	C(=O)(C(C(C(C(C(C(C(C(C(C(C(C(F)(F)F)(F)F)(F)F)(F)F)(F)F)(F)F)(F)F)(F)F)(F)F)(F)F)(F)F)(F)F)O	[M-H]-	201.05	Organic acids and derivatives	PFAS		UACCSCEC_ac1c00142_si_002_TS-5.csv
Perfluoro-n-dodecanoic acid	C12HF23O2	67545	C(=O)(C(C(C(C(C(C(C(C(C(C(C(F)(F)F)(F)F)(F)F)(F)F)(F)F)(F)F)(F)F)(F)F)(F)F)(F)F)(F)F)O	[M-H]-	192.16	Organic acids and derivatives	PFAS		UACCSCEC_ac1c00142_si_002_TS-5.csv
Perfluoro-n-undecanoic acid	C11HF21O2	77222	C(=O)(C(C(C(C(C(C(C(C(C(C(F)(F)F)(F)F)(F)F)(F)F)(F)F)(F)F)(F)F)(F)F)(F)F)(F)F)O	[M-H]-	182.86	Organic acids and derivatives	PFAS		UACCSCEC_ac1c00142_si_002_TS-5.csv
Perfluoro-n-decanoic acid	C10HF19O2	9555	C(=O)(C(C(C(C(C(C(C(C(C(F)(F)F)(F)F)(F)F)(F)F)(F)F)(F)F)(F)F)(F)F)(F)F)O	[M-H]-	174.29	Organic acids and derivatives	PFAS		UACCSCEC_ac1c00142_si_002_TS-5.csv
Perfluoro-n-nonanoic acid	C9HF17O2	67821	C(=O)(C(C(C(C(C(C(C(C(F)(F)F)(F)F)(F)F)(F)F)(F)F)(F)F)(F)F)(F)F)O	[M-H]-	165.06	Organic acids and derivatives	PFAS		UACCSCEC_ac1c00142_si_002_TS-5.csv
Perfluoro-n-octanoic acid	C8HF15O2	9554	C(=O)(C(C(C(C(C(C(C(F)(F)F)(F)F)(F)F)(F)F)(F)F)(F)F)(F)F)O	[M-H]-	156.37	Organic acids and derivatives	PFAS		UACCSCEC_ac1c00142_si_002_TS-5.csv
Perfluoro-n-heptanoic acid	C7HF13O2	67818	C(=O)(C(C(C(C(C(C(F)(F)F)(F)F)(F)F)(F)F)(F)F)(F)F)O	[M-H]-	147.61	Organic acids and derivatives	PFAS		UACCSCEC_ac1c00142_si_002_TS-5.csv
4-(4-hydroxy-3-prop-2-enylphenyl)sulfonyl-2-prop-2-enylphenol	C18H18O4S	833466	C=CCC1=C(C=CC(=C1)S(=O)(=O)C2=CC(=C(C=C2)O)CC=C)O	[M-H]-	180	Benzenoids	Bisphenols		UACCSCEC_ac1c00142_si_002_TS-5.csv
Bisphenol C	C14H10Cl2O2	84677	C1=CC(=CC=C1C(=C(Cl)Cl)C2=CC=C(C=C2)O)O	[M-H]-	165.3	Benzenoids	Bisphenols		UACCSCEC_ac1c00142_si_002_TS-5.csv
Bisphenol AF	C15H10F6O2	73864	C1=CC(=CC=C1C(C2=CC=C(C=C2)O)(C(F)(F)F)C(F)(F)F)O	[M-H]-	166.06	Benzenoids	Bisphenols		UACCSCEC_ac1c00142_si_002_TS-5.csv
Bisphenol F	C13H12O2	12111	C1=CC(=CC=C1CC2=CC=C(C=C2)O)O	[M-H]-	155.05	Benzenoids	Bisphenols		UACCSCEC_ac1c00142_si_002_TS-5.csv
Bisphenol A	C15H16O2	6623	CC(C)(C1=CC=C(C=C1)O)C2=CC=C(C=C2)O	[M-H]-	163.5	Benzenoids	Bisphenols		UACCSCEC_ac1c00142_si_002_TS-5.csv
Bisphenol AP	C20H18O2	623849	CC(C1=CC=CC=C1)(C2=CC=C(C=C2)O)C3=CC=C(C=C3)O	[M-H]-	179.95	Benzenoids	Bisphenols		UACCSCEC_ac1c00142_si_002_TS-5.csv
tris(tert-butylphenyl) phosphate	C30H39O4P	3034371	CC(C)(C)C1=CC=CC=C1OP(=O)(OC2=CC=CC=C2C(C)(C)C)OC3=CC=CC=C3C(C)(C)C	[M+H]+	237.14	Benzenoids	Organophosphorus		UACCSCEC_ac1c00142_si_002_TS-5.csv
Bisphenol A bis(diphenyl phosphate)	C39H34O8P2	9874825	CC(C)(C1=CC=C(C=C1)OP(=O)(OC2=CC=CC=C2)OC3=CC=CC=C3)C4=CC=C(C=C4)OP(=O)(OC5=CC=CC=C5)OC6=CC=CC=C6	[M+H]+	246.33	Benzenoids	Organophosphorus		UACCSCEC_ac1c00142_si_002_TS-5.csv
tri-p-tolyl phosphate	C21H21O4P	6529	CC1=CC=C(C=C1)OP(=O)(OC2=CC=C(C=C2)C)OC3=CC=C(C=C3)C	[M+H]+	190.02	Benzenoids	Organophosphorus		UACCSCEC_ac1c00142_si_002_TS-5.csv
Diphenylcresyl phosphate	C19H17O4P	520263	CC1=CC=CC=C1OP(=O)(OC2=CC=CC=C2)OC3=CC=CC=C3	[M+H]+	180.48	Benzenoids	Organophosphorus		UACCSCEC_ac1c00142_si_002_TS-5.csv
tri-o-tolyl phosphate	C21H21O4P	6527	CC1=CC=CC=C1OP(=O)(OC2=CC=CC=C2C)OC3=CC=CC=C3C	[M+H]+	182.39	Benzenoids	Organophosphorus		UACCSCEC_ac1c00142_si_002_TS-5.csv
Sphinganine	C18H39NO2	91486	CCCCCCCCCCCCCCC[C@H]([C@H](CO)N)O	[M+H]	188.9	Organic oxygen compounds	Organonitrogen compounds	Amines	20190304JAP_CCSdatabase_final.csv
5-Hydroxy-2-ethylhexyl diphenyl phosphate	C20H27O5P	134818005	CC(O)CCC(CC)COP(=O)(Oc1ccccc1)Oc1ccccc1	[M+H]+	186.66	Organic oxygen compounds			UACCSCEC_ac1c00142_si_002_TS-5.csv
Di-O-cresylphosphate	C14H15O4P	92302	CC1=CC=CC=C1OP(=O)(O)OC2=CC=CC=C2C	[M+H]+	163.59	Organic oxygen compounds			UACCSCEC_ac1c00142_si_002_TS-5.csv
p-Nitrophenol	C6H5NO3	980	C1=CC(=CC=C1[N+](=O)[O-])O	[M-H]-	119.78	Organic oxygen compounds			UACCSCEC_ac1c00142_si_002_TS-5.csv
3,5-ditert-butyl-4-hydroxybenzaldehyde	C15H22O2	73219	CC(C)(C)C1=CC(=CC(=C1O)C(C)(C)C)C=O	[M+H]+	165.21	Organic oxygen compounds			UACCSCEC_ac1c00142_si_002_TS-5.csv
Diazinon	C12H21N2O3PS	3017	CCOP(=S)(OCC)OC1=NC(=NC(=C1)C)C(C)C	[M+H]+	173.15	Organic oxygen compounds			UACCSCEC_ac1c00142_si_002_TS-5.csv
D-Biotin	C10H16N2O3S	171548	C1[C@H]2[C@@H]([C@@H](S1)CCCCC(=O)O)NC(=O)N2	[M-H]	157.1	Organic oxygen compounds	Phenylpropanoic acids		20190304JAP_CCSdatabase_final.csv
Rosmarinate	C18H16O8	5281792	C1=CC(=C(C=C1C[C@H](C(=O)O)OC(=O)/C=C/C2=CC(=C(C=C2)O)O)O)O	[M-H]	172.6	Organic oxygen compounds	Cinnamic acids and derivatives	Hydroxycinnamic acids and derivatives	20190304JAP_CCSdatabase_final.csv
2-Aminobenzothiazole	C7H6N2S	8706	C1=CC=C2C(=C1)N=C(S2)N	[M+H]+	128.6	Organic oxygen compounds	Thiazoles		UACCSCEC_ac1c00142_si_002_TS-5.csv
2-(Methylthio)benzothiazole	C8H7NS2	11989	CSC1=NC2=CC=CC=C2S1	[M+H]+	131.32	Organic oxygen compounds	Thiazoles		UACCSCEC_ac1c00142_si_002_TS-5.csv
Anabasine	C10H14N2	2181	C1CCNC(C1)C2=CN=CC=C2	[M+H]	139.3	Organic oxygen compounds			20190304JAP_CCSdatabase_final.csv
L-Mimosine	C8H10N2O4	3862	C1=CN(C=C(C1=O)O)CC(C(=O)O)N	[M+H]+	143.4670556	Organic acids and derivatives	Amino Acids		metabolitedata.csv
4-Hydroxyphenyl phenyl phosphate	C12H11O5P	21410667	C1=CC=C(C=C1)OP(=O)(O)OC2=CC=C(C=C2)O	[M+H]+	162.44	Organic oxygen compounds			UACCSCEC_ac1c00142_si_002_TS-5.csv
Diphenyl hydrogen phosphate	C12H11O4P	13282	C1=CC=C(C=C1)OP(=O)(O)OC2=CC=CC=C2	[M+H]+	157.41	Organic oxygen compounds			UACCSCEC_ac1c00142_si_002_TS-5.csv
Para-hydroxy triphenyl phosphate	C18H15O5P	57058026	C1=CC=C(C=C1)OP(=O)(OC2=CC=CC=C2)OC3=CC=C(C=C3)O	[M-H]-	181.9	Organic oxygen compounds			UACCSCEC_ac1c00142_si_002_TS-5.csv
3-Hydroxyphenyl diphenyl phosphate	C18H15O5P	10925911	C1=CC=C(C=C1)OP(=O)(OC2=CC=CC=C2)OC3=CC=CC(=C3)O	[M+H]+	180.35	Organic oxygen compounds			UACCSCEC_ac1c00142_si_002_TS-5.csv
Resorcinol bis(diphenyl phosphate)	C30H24O8P2	93311	C1=CC=C(C=C1)OP(=O)(OC2=CC=CC=C2)OC3=CC(=CC=C3)OP(=O)(OC4=CC=CC=C4)OC5=CC=CC=C5	[M+H]+	228.77	Organic oxygen compounds	Organophosphorus		UACCSCEC_ac1c00142_si_002_TS-5.csv
triphenyl phosphate	C18H15O4P	8289	C1=CC=C(C=C1)OP(=O)(OC2=CC=CC=C2)OC3=CC=CC=C3	[M+H]+	174.74	Organic oxygen compounds	Organophosphorus		UACCSCEC_ac1c00142_si_002_TS-5.csv
L-Gulonolactone	C6H10O6	439373	C([C@@H]([C@@H]1[C@@H]([C@@H](C(=O)O1)O)O)O)O	[M-H]	129.9	Organoheterocyclic compounds	Lactones	Gamma butyrolactones	20190304JAP_CCSdatabase_final.csv
L-Ascorbic Acid	C6H8O6	54670067	C([C@@H]([C@@H]1C(=C(C(=O)O1)O)O)O)O	[M-H]	127.9	Organoheterocyclic compounds	Dihydrofurans	Furanones	20190304JAP_CCSdatabase_final.csv
Dehydro-L-(+)-ascorbic Acid Monomer	C6H6O6	440667	C([C@@H]([C@@H]1C(=O)C(=O)C(=O)O1)O)O	[M-H]	128.2	Organoheterocyclic compounds	Lactones	Gamma butyrolactones	20190304JAP_CCSdatabase_final.csv
Dihydrobiopterin	C9H13N5O3	119055	C[C@@H]([C@@H](C1=NC2=C(NC1)NC(=NC2=O)N)O)O	[M-H]	150.9	Organoheterocyclic compounds	Pteridines and derivatives	Pterins and derivatives	20190304JAP_CCSdatabase_final.csv
Sparfloxacin	C19H22F2N4O3	60464	C[C@@H]1CN(C[C@@H](N1)C)C2=C(C(=C3C(=C2F)N(C=C(C3=O)C(=O)O)C4CC4)N)F	[M+H]	190.2	Organoheterocyclic compounds	Quinolines and derivatives	Quinoline carboxylic acids	20190304JAP_CCSdatabase_final.csv
1-Methylnicotinamide	C7H9N2O	70495	C[N+]1=CC=CC(=C1)C(=O)N.[Cl-]	[M*]	126.1	Organoheterocyclic compounds	Pyridines and derivatives	Pyridinecarboxylic acids and derivatives	20190304JAP_CCSdatabase_final.csv
Picloram	C6H3Cl3N2O2	15965	C1(=C(C(=NC(=C1Cl)Cl)C(=O)O)Cl)N	[M-H]	136.4	Organoheterocyclic compounds	Pyridines and derivatives	Pyridinecarboxylic acids and derivatives	20190304JAP_CCSdatabase_final.csv
Allantoin	C4H6N4O3	204	C1(C(=O)NC(=O)N1)NC(=O)N	[M-H]	126.7	Organoheterocyclic compounds	Azoles	Imidazoles	20190304JAP_CCSdatabase_final.csv
Uracil-5-carboxylate	C5H4N2O4	90301	C1=C(C(=O)NC(=O)N1)C(=O)O	[M-H]	119.3	Organoheterocyclic compounds	Diazines	Pyrimidines and pyrimidine derivatives	20190304JAP_CCSdatabase_final.csv
5-Hydroxymethyluracil	C5H6N2O3	78168	C1=C(C(=O)NC(=O)N1)CO	[M-H]	124.1	Organoheterocyclic compounds	Diazines	Pyrimidines and pyrimidine derivatives	20190304JAP_CCSdatabase_final.csv
Cytosine	C4H5N3O	597	C1=C(NC(=O)N=C1)N	[M+H]	117.4	Organoheterocyclic compounds	Diazines	Pyrimidines and pyrimidine derivatives	20190304JAP_CCSdatabase_final.csv
Orotic Acid	C5H4N2O4	967	C1=C(NC(=O)NC1=O)C(=O)O	[M-H]	121.7	Organoheterocyclic compounds	Diazines	Pyrimidines and pyrimidine derivatives	20190304JAP_CCSdatabase_final.csv
Urocanate	C6H6N2O2	736715	C1=C(NC=N1)/C=C/C(=O)O	[M-H]	121.3	Organoheterocyclic compounds	Azoles	Imidazoles	20190304JAP_CCSdatabase_final.csv
4-Imidazoleacetate	C5H6N2O2	145685	C1=C(NC=N1)CC(=O)O.Cl	[M+H]	124	Organoheterocyclic compounds	Azoles	Imidazoles	20190304JAP_CCSdatabase_final.csv
Mangiferin	C19H18O11	5281647	C1=C2C(=CC(=C1O)O)OC3=C(C2=O)C(=C(C(=C3)O)[C@H]4[C@@H]([C@H]([C@@H]([C@H](O4)CO)O)O)O)O	[M-H]	195.1	Organoheterocyclic compounds	Benzopyrans	1-benzopyrans	20190304JAP_CCSdatabase_final.csv
Purine	C5H4N4	1044	C1=C2C(=NC=N1)N=CN2	[M-H]	114.6	Organoheterocyclic compounds	Imidazopyrimidines	Purines and purine derivatives	20190304JAP_CCSdatabase_final.csv
Quinolinic Acid	C7H5NO4	1066	C1=CC(=C(N=C1)C(=O)O)C(=O)O	[M-H]	128	Organoheterocyclic compounds	Pyridines and derivatives	Pyridinecarboxylic acids and derivatives	20190304JAP_CCSdatabase_final.csv
Fludioxonil	C12H6F2N2O2	86398	C1=CC(=C2C(=C1)OC(O2)(F)F)C3=CNC=C3C#N	[M-H]	147.8	Organoheterocyclic compounds	Benzodioxoles		20190304JAP_CCSdatabase_final.csv
Nicotinamide	C6H6N2O	936	C1=CC(=CN=C1)C(=O)N	[M+H]	126.7	Organoheterocyclic compounds	Pyridines and derivatives	Pyridinecarboxylic acids and derivatives	20190304JAP_CCSdatabase_final.csv
Nicotinate	C6H5NO2	938	C1=CC(=CN=C1)C(=O)O	[M-H]	121.3	Organoheterocyclic compounds	Pyridines and derivatives	Pyridinecarboxylic acids and derivatives	20190304JAP_CCSdatabase_final.csv
2,6-Dihydroxypyridine	C5H5NO2	69371	C1=CC(=O)NC(=C1)O	[M-H]	114.2	Organoheterocyclic compounds	Pyridines and derivatives	Hydropyridines	20190304JAP_CCSdatabase_final.csv
2-Hydroxypyridine	C5H5NO	8871	C1=CC(=O)NC=C1	[M+H]	115.5	Organoheterocyclic compounds	Pyridines and derivatives	Hydropyridines	20190304JAP_CCSdatabase_final.csv
6-Hydroxynicotinate	C6H5NO3	72924	C1=CC(=O)NC=C1C(=O)O	[M+H]	129.1	Organoheterocyclic compounds	Pyridinecarboxylic acids and derivatives	Pyridinecarboxylic acids	20190304JAP_CCSdatabase_final.csv
4-Quinolinecarboxylate	C10H7NO2	10243	C1=CC=C2C(=C1)C(=CC=N2)C(=O)O	[M-H]	134.6	Organoheterocyclic compounds	Quinolines and derivatives		20190304JAP_CCSdatabase_final.csv
L-Tryptophanamide	C11H13N3O	6452180	C1=CC=C2C(=C1)C(=CN2)C[C@@H](C(=O)N)N.Cl	[M-H]	143.5	Organoheterocyclic compounds	Indoles and derivatives	Tryptamines and derivatives	20190304JAP_CCSdatabase_final.csv
L-Tryptophan	C11H12N2O2	6305	C1=CC=C2C(=C1)C(=CN2)C[C@@H](C(=O)O)N	[M-H]	149.1	Organoheterocyclic compounds	Indoles and derivatives	Indolyl carboxylic acids and derivatives	20190304JAP_CCSdatabase_final.csv
D-Tryptophan	C11H12N2O2	9060	C1=CC=C2C(=C1)C(=CN2)C[C@H](C(=O)O)N	[M-H]	142.6	Organoheterocyclic compounds	Indoles and derivatives	Indolyl carboxylic acids and derivatives	20190304JAP_CCSdatabase_final.csv
Indole-3-pyruvate	C11H9NO3	803	C1=CC=C2C(=C1)C(=CN2)CC(=O)C(=O)O	[M-H]	137.8	Organoheterocyclic compounds	Indoles and derivatives	Indolyl carboxylic acids and derivatives	20190304JAP_CCSdatabase_final.csv
Indole-3-acetamide	C10H10N2O	397	C1=CC=C2C(=C1)C(=CN2)CC(=O)N	[M-H]	135.8	Organoheterocyclic compounds	Indoles and derivatives	Indoles	20190304JAP_CCSdatabase_final.csv
Indole-3-acetate	C10H9NO2	802	C1=CC=C2C(=C1)C(=CN2)CC(=O)O	[M+H]	136.4	Organoheterocyclic compounds	Indoles and derivatives	Indolyl carboxylic acids and derivatives	20190304JAP_CCSdatabase_final.csv
Indoleacetaldehyde	C10H9NO	71308323	C1=CC=C2C(=C1)C(=CN2)CC(O)S(=O)(=O)[O-].[Na+]	[M-H]	131	Organoheterocyclic compounds	Indoles and derivatives	Indoles	20190304JAP_CCSdatabase_final.csv
Tryptamine	C10H12N2	1150	C1=CC=C2C(=C1)C(=CN2)CCN	[M+H]	127.6	Organoheterocyclic compounds	Indoles and derivatives	Tryptamines and derivatives	20190304JAP_CCSdatabase_final.csv
Indole-3-ethanol	C10H11NO	10685	C1=CC=C2C(=C1)C(=CN2)CCO	[M-H]	133	Organoheterocyclic compounds	Indoles and derivatives	Indoles	20190304JAP_CCSdatabase_final.csv
Kynurenate	C10H7NO3	3845	C1=CC=C2C(=C1)C(=O)C=C(N2)C(=O)O	[M-H]	135.3	Organoheterocyclic compounds	Quinolines and derivatives	Quinoline carboxylic acids	20190304JAP_CCSdatabase_final.csv
Acridine	C13H9N	9215	C1=CC=C2C(=C1)C=C3C=CC=CC3=N2	[M*]	132	Organoheterocyclic compounds	Quinolines and derivatives	Acridines	20190304JAP_CCSdatabase_final.csv
2-Quinolinecarboxylate	C10H7NO2	7124	C1=CC=C2C(=C1)C=CC(=N2)C(=O)O	[M+H]	132.3	Organoheterocyclic compounds	Quinolines and derivatives	Quinoline carboxylic acids	20190304JAP_CCSdatabase_final.csv
Thiabendazole	C10H7N3S	5430	C1=CC=C2C(=C1)NC(=N2)C3=CSC=N3	[M-H]	144.1	Organoheterocyclic compounds	Benzimidazoles		20190304JAP_CCSdatabase_final.csv
5,12-Naphthacene Quinone	C18H10O2	14160	C1=CC=C2C=C3C(=CC2=C1)C(=O)C4=CC=CC=C4C3=O	[M+H]	155.7	Organoheterocyclic compounds	Quinolines and derivatives	Benzoquinolines	20190304JAP_CCSdatabase_final.csv
Xanthurenate	C10H7NO4	5699	C1=CC2=C(C(=C1)O)NC(=CC2=O)C(=O)O	[M-H]	134.6	Organoheterocyclic compounds	Quinolines and derivatives	Quinoline carboxylic acids	20190304JAP_CCSdatabase_final.csv
5-Hydroxy-L-tryptophan	C11H12N2O3	439280	C1=CC2=C(C=C1O)C(=CN2)C[C@@H](C(=O)O)N	[M-H]	147	Organoheterocyclic compounds	Indoles and derivatives	Tryptamines and derivatives	20190304JAP_CCSdatabase_final.csv
5-Hydroxyindoleacetate	C10H9NO3	1826	C1=CC2=C(C=C1O)C(=CN2)CC(=O)O	[M-H]	137.3	Organoheterocyclic compounds	Indoles and derivatives	Indolyl carboxylic acids and derivatives	20190304JAP_CCSdatabase_final.csv
Serotonin	C10H12N2O	5202	C1=CC2=C(C=C1O)C(=CN2)CCN	[M-H]	147.1	Organoheterocyclic compounds	Indoles and derivatives	Tryptamines and derivatives	20190304JAP_CCSdatabase_final.csv
Pterin	C6H5N5O	73000	C1=CN=C2C(=N1)C(=O)N=C(N2)N	[M-H]	128.7	Organoheterocyclic compounds	Pteridines and derivatives	Pterins and derivatives	20190304JAP_CCSdatabase_final.csv
Lumazine	C6H4N4O2	10250	C1=CN=C2C(=N1)C(=O)NC(=O)N2	[M-H]	126.6	Organoheterocyclic compounds	Pteridines and derivatives	Pterins and derivatives	20190304JAP_CCSdatabase_final.csv
Pyrrole-2-Carboxylate	C5H5NO2	12473	C1=CNC(=C1)C(=O)O	[M-H]	114.3	Organoheterocyclic compounds	Pyrroles	Pyrrole carboxylic acids and derivatives	20190304JAP_CCSdatabase_final.csv
Uracil	C4H4N2O2	1174	C1=CNC(=O)NC1=O	[M-H]	113.5	Organoheterocyclic compounds	Diazines	Pyrimidines and pyrimidine derivatives	20190304JAP_CCSdatabase_final.csv
3,4-Dihydroxypyridine	C5H5NO2	105085	C1=CNC=C(C1=O)O	[M+H]	125.9	Organoheterocyclic compounds	Pyridines and derivatives	Hydropyridines	20190304JAP_CCSdatabase_final.csv
Guanine	C5H5N5O	764	C1=NC2=C(N1)C(=O)N=C(N2)N	[M+H]	131	Organoheterocyclic compounds	Imidazopyrimidines	Purines and purine derivatives	20190304JAP_CCSdatabase_final.csv
Hypoxanthine	C5H4N4O	790	C1=NC2=C(N1)C(=O)N=CN2	[M-H]	121	Organoheterocyclic compounds	Imidazopyrimidines	Purines and purine derivatives	20190304JAP_CCSdatabase_final.csv
Xanthine	C5H4N4O2	1188	C1=NC2=C(N1)C(=O)NC(=O)N2	[M-H]	122.2	Organoheterocyclic compounds	Imidazopyrimidines	Purines and purine derivatives	20190304JAP_CCSdatabase_final.csv
Adenine	C5H5N5	190	C1=NC2=NC=NC(=C2N1)N	[M-H]	120.6	Organoheterocyclic compounds	Imidazopyrimidines	Purines and purine derivatives	20190304JAP_CCSdatabase_final.csv
Adenine Monochloride	C5H5N5	76219	C1=NC2=NC=NC(=C2N1)N.Cl	[M-H]	119.9	Organoheterocyclic compounds	Imidazopyrimidines	Purines and purine derivatives	20190304JAP_CCSdatabase_final.csv
Uric Acid	C5H4N4O3	1175	C12=C(NC(=O)N1)NC(=O)NC2=O	[M-H]	126.2	Organoheterocyclic compounds	Imidazopyrimidines	Purines and purine derivatives	20190304JAP_CCSdatabase_final.csv
Leucovorin Calcium	C20H21CaN7O7	15150	C1C(N(C2=C(N1)NC(=NC2=O)N)C=O)CNC3=CC=C(C=C3)C(=O)N[C@@H](CCC(=O)[O-])C(=O)[O-].[Ca+2]	[M-H]	201.7	Organoheterocyclic compounds	Pteridines and derivatives	Pterins and derivatives	20190304JAP_CCSdatabase_final.csv
N6-(delta2-Isopentenyl)-adenine	C10H13N5	92180	CC(=CCNC1=NC=NC2=C1NC=N2)C	[M-H]	150.8	Organoheterocyclic compounds	Imidazopyrimidines	Purines and purine derivatives	20190304JAP_CCSdatabase_final.csv
N-Acetylserotonin	C12H14N2O2	903	CC(=O)NCCC1=CNC2=C1C=C(C=C2)O	[M-H]	150.6	Organoheterocyclic compounds	Indoles and derivatives	Hydroxyindoles	20190304JAP_CCSdatabase_final.csv
Melatonin	C13H16N2O2	896	CC(=O)NCCC1=CNC2=C1C=C(C=C2)OC	[M-H]	155.9	Organoheterocyclic compounds	Indoles and derivatives	Indoles	20190304JAP_CCSdatabase_final.csv
Metribuzin	C8H14N4OS	30479	CC(C)(C)C1=NN=C(N(C1=O)N)SC	[M+H]	149.5	Organoheterocyclic compounds	Triazines		20190304JAP_CCSdatabase_final.csv
Indomethacin	C19H16ClNO4	3715	CC1=C(C2=C(N1C(=O)C3=CC=C(C=C3)Cl)C=CC(=C2)OC)CC(=O)O	[M+H]	182.4	Organoheterocyclic compounds	Indoles and derivatives	Benzoylindoles	20190304JAP_CCSdatabase_final.csv
5-Methylcytosine	C5H7N3O	65040	CC1=C(NC(=O)N=C1)N	[M+H]	121.1	Organoheterocyclic compounds	Diazines	Pyrimidines and pyrimidine derivatives	20190304JAP_CCSdatabase_final.csv
Thiamine	C12H17N4OS	1130	CC1=C(SC=[N+]1CC2=CN=C(N=C2N)C)CCO	[M*]	163	Organoheterocyclic compounds	Diazines	Pyrimidines and pyrimidine derivatives	20190304JAP_CCSdatabase_final.csv
Thiamine Monophosphate	C12H17N4O4PS	10761	CC1=C(SC=[N+]1CC2=CN=C(N=C2N)C)CCOP(=O)(O)O.[Cl-]	[M+H]	171.1	Organoheterocyclic compounds	Diazines	Pyrimidines and pyrimidine derivatives	20190304JAP_CCSdatabase_final.csv
Thiamine Pyrophosphate	C12H18N4O7P2S	1132	CC1=C(SC=[N+]1CC2=CN=C(N=C2N)C)CCOP(=O)(O)OP(=O)(O)O	[M-H]	178.1	Organoheterocyclic compounds	Diazines	Pyrimidines and pyrimidine derivatives	20190304JAP_CCSdatabase_final.csv
Riboflavin	C17H20N4O6	493570	CC1=CC2=C(C=C1C)N(C3=NC(=O)NC(=O)C3=N2)C[C@@H]([C@@H]([C@@H](CO)O)O)O	[M-H]	187.3	Organoheterocyclic compounds	Pteridines and derivatives	Alloxazines and isoalloxazines	20190304JAP_CCSdatabase_final.csv
Lumichrome	C12H10N4O2	506	CC1=CC2=C(C=C1C)N=C3C(=NC(=O)NC3=O)N2	[M-H]	155.6	Organoheterocyclic compounds	Pteridines and derivatives	Alloxazines and isoalloxazines	20190304JAP_CCSdatabase_final.csv
5,6-Dimethylbenzimidazole	C9H10N2	675	CC1=CC2=C(C=C1C)N=CN2	[M-H]	130	Organoheterocyclic compounds	Benzimidazoles		20190304JAP_CCSdatabase_final.csv
4-Pyridoxate	C8H9NO4	6723	CC1=NC=C(C(=C1O)C(=O)O)CO	[M-H]	130.9	Organoheterocyclic compounds	Pyridines and derivatives	Pyridinecarboxylic acids and derivatives	20190304JAP_CCSdatabase_final.csv
Pyridoxal	C8H9NO3	1050	CC1=NC=C(C(=C1O)C=O)CO	[M-H]	129.2	Organoheterocyclic compounds	Pyridines and derivatives	Pyridine carboxaldehydes	20190304JAP_CCSdatabase_final.csv
Pyridoxal-5'-phosphate Hydrate	C8H10NO6P	1051	CC1=NC=C(C(=C1O)C=O)COP(=O)(O)O	[M-H]	149.4	Organoheterocyclic compounds	Pyridines and derivatives	Pyridine carboxaldehydes	20190304JAP_CCSdatabase_final.csv
Pyridoxamine	C8H12N2O2	1052	CC1=NC=C(C(=C1O)CN)CO	[M-H]	136.4	Organoheterocyclic compounds	Pyridines and derivatives	Pyridoxamines	20190304JAP_CCSdatabase_final.csv
Pyridoxine	C8H11NO3	1054	CC1=NC=C(C(=C1O)CO)CO	[M-H]	134.7	Organoheterocyclic compounds	Pyridines and derivatives	Pyridoxines	20190304JAP_CCSdatabase_final.csv
Salsolinol	C10H13NO2	21577972	CC1C2=CC(=C(C=C2CC[NH2+]1)O)O	[M-H]	139.7	Organoheterocyclic compounds	Tetrahydroisoquinolines		20190304JAP_CCSdatabase_final.csv
3-Methyl-2-oxindole	C9H9NO	150923	CC1C2=CC=CC=C2NC1=O	[M+H]	130.8	Organoheterocyclic compounds	Indoles and derivatives	Indolines	20190304JAP_CCSdatabase_final.csv
Atrazine	C8H14ClN5	2256	CCNC1=NC(=NC(=N1)Cl)NC(C)C	[M+H]	149.8	Organoheterocyclic compounds	Triazines	1,3,5-triazines	20190304JAP_CCSdatabase_final.csv
Terbutryn	C10H19N5S	13450	CCNC1=NC(=NC(=N1)SC)NC(C)(C)C	[M+H]	160.2	Organoheterocyclic compounds	Triazines		20190304JAP_CCSdatabase_final.csv
Ethyl-3-indoleacetate	C12H13NO2	13067	CCOC(=O)CC1=CNC2=CC=CC=C21	[M-H]	145.8	Organoheterocyclic compounds	Indoles and derivatives	Indolyl carboxylic acids and derivatives	20190304JAP_CCSdatabase_final.csv
5-Methyltetrahydrofolic Acid	C20H25N7O6	444412	CN1[C@H](CNC2=C1C(=O)N=C(N2)N)CNC3=CC=C(C=C3)C(=O)N[C@@H](CCC(=O)O)C(=O)O	[M-H]	199.8	Organoheterocyclic compounds	Pteridines and derivatives	Pterins and derivatives	20190304JAP_CCSdatabase_final.csv
Halosulfuron-methyl	C13H15ClN6O7S	91763	CN1C(=C(C(=N1)Cl)C(=O)OC)S(=O)(=O)NC(=O)NC2=NC(=CC(=N2)OC)OC	[M-H]	194.7	Organoheterocyclic compounds	Azoles	Pyrazoles	20190304JAP_CCSdatabase_final.csv
Hexazinone	C12H20N4O2	39965	CN1C(=NC(=O)N(C1=O)C2CCCCC2)N(C)C	[M+H]	162.1	Organoheterocyclic compounds	Triazines		20190304JAP_CCSdatabase_final.csv
5-Methyltetrahydrofolate	C20H25N7O6	40114	CN1C(CNC2=C1C(=O)N=C(N2)N)CNC3=CC=C(C=C3)C(=O)NC(CCC(=O)[O-])C(=O)[O-].[Na+].[Na+]	[M-H]	197.8	Organoheterocyclic compounds	Pteridines and derivatives	Pterins and derivatives	20190304JAP_CCSdatabase_final.csv
3-Methyladenine	C6H7N5	1673	CN1C=NC(=C2C1=NC=N2)N	[M+H]	126.5	Organoheterocyclic compounds	Imidazopyrimidines	Purines and purine derivatives	20190304JAP_CCSdatabase_final.csv
1-Methyladenine	C6H7N5	135398646	CN1C=NC2=C(C1=N)NC=N2	[M-H]	130.5	Organoheterocyclic compounds	Imidazopyrimidines	Purines and purine derivatives	20190304JAP_CCSdatabase_final.csv
Paraxanthine	C7H8N4O2	4687	CN1C=NC2=C1C(=O)N(C(=O)N2)C	[M+H]	134.5	Organoheterocyclic compounds	Imidazopyrimidines	Purines and purine derivatives	20190304JAP_CCSdatabase_final.csv
Caffeine	C8H10N4O2	2519	CN1C=NC2=C1C(=O)N(C(=O)N2C)C	[M+H]	140.6	Organoheterocyclic compounds	Imidazopyrimidines	Purines and purine derivatives	20190304JAP_CCSdatabase_final.csv
7-Methylguanine	C6H7N5O	11361	CN1C=NC2=C1C(=O)N=C(N2)N	[M-H]	136.1	Organoheterocyclic compounds	Imidazopyrimidines	Purines and purine derivatives	20190304JAP_CCSdatabase_final.csv
Theobromine	C7H8N4O2	5429	CN1C=NC2=C1C(=O)NC(=O)N2C	[M+H]	131.1	Organoheterocyclic compounds	Imidazopyrimidines	Purines and purine derivatives	20190304JAP_CCSdatabase_final.csv
Theophylline	C7H8N4O2	2153	CN1C2=C(C(=O)N(C1=O)C)NC=N2	[M-H]	133.6	Organoheterocyclic compounds	Imidazopyrimidines	Purines and purine derivatives	20190304JAP_CCSdatabase_final.csv
N-Methyltryptamine	C11H14N2	6088	CNCCC1=CNC2=CC=CC=C21	[M+H]	142.8	Organoheterocyclic compounds	Indoles and derivatives	Tryptamines and derivatives	20190304JAP_CCSdatabase_final.csv
Indole-3-methyl Acetate	C11H11NO2	74706	COC(=O)CC1=CNC2=CC=CC=C21	[M-H]	141.4	Organoheterocyclic compounds	Indoles and derivatives	Indolyl carboxylic acids and derivatives	20190304JAP_CCSdatabase_final.csv
Myristicin	C11H12O3	4276	COC1=CC(=CC2=C1OCO2)CC=C	[M-H]	144.2	Organoheterocyclic compounds	Benzodioxoles		20190304JAP_CCSdatabase_final.csv
Thiopurine-(S)-methylether	C6H6N4S	5778	CSC1=NC=NC2=C1NC=N2	[M-H]	128	Organoheterocyclic compounds	Imidazopyrimidines	Purines and purine derivatives	20190304JAP_CCSdatabase_final.csv
Nicotinic Acid Adenine Dinucleotide Phosphate	C21H27N6O18P3	123953	C1=CC(=C[N+](=C1)[C@H]2[C@@H]([C@@H]([C@H](O2)COP(=O)(O)OP(=O)(O)OC[C@@H]3[C@H]([C@H]([C@@H](O3)N4C=NC5=C(N=CN=C54)N)OP(=O)(O)O)O)O)O)C(=O)O	[M-H]	230.5	Organoheterocyclic compounds	(5'->5')-dinucleotides		20190304JAP_CCSdatabase_final.csv
Nicotinamide Hypoxanthine Dinucleotide	C21H27N6O15P2	440334	C1=CC(=C[N+](=C1)[C@H]2[C@@H]([C@@H]([C@H](O2)COP(=O)(O)OP(=O)(O)OC[C@@H]3[C@H]([C@H]([C@@H](O3)N4C=NC5=C4NC=NC5=O)O)O)O)O)C(=O)N	[M+H]	221.4	Organoheterocyclic compounds	(5'->5')-dinucleotides		20190304JAP_CCSdatabase_final.csv
NADP	C21H28N7O17P3	18530242	C1=CC(=C[N+](=C1)C2C(C(C(O2)COP(=O)([O-])OP(=O)(O)OCC3C(C(C(O3)N4C=NC5=C(N=CN=C54)N)OP(=O)(O)[O-])O)O)O)C(=O)N.[Na+]	[M-H]	230.7	Organoheterocyclic compounds	(5'->5')-dinucleotides		20190304JAP_CCSdatabase_final.csv
Nicotinamide Hypoxanthine Dinucleotide	C21H26N6O15P2	71308718	C1=CC(=C[N+](=C1)C2C(C(C(O2)COP(=O)([O-])OP(=O)(O)OCC3C(C(C(O3)N4C=NC5=C4NC=NC5=O)O)O)O)O)C(=O)N.[Na]	[M-H]	217.7	Organoheterocyclic compounds	(5'->5')-dinucleotides		20190304JAP_CCSdatabase_final.csv
Guanosine Diphosphate Mannose	C16H25N5O16P2	71312088	C1=NC2=C(N1C3C(C(C(O3)COP(=O)([O-])OP(=O)([O-])OC4C(C(C(C(O4)CO)O)O)O)O)O)NC(=NC2=O)N.[Na+].[Na+]	[M-H]	208.8	Organoheterocyclic compounds	Pyrimidine nucleotides	Pyrimidine ribonucleotides	20190304JAP_CCSdatabase_final.csv
NADPH	C21H31N7O17P3	5884	C1C=CN(C=C1C(=O)N)[C@H]2[C@@H]([C@@H]([C@H](O2)COP(=O)(O)OP(=O)(O)OC[C@@H]3[C@H]([C@H]([C@@H](O3)N4C=NC5=C(N=CN=C54)N)OP(=O)(O)O)O)O)O	[M-H]	246.7	Organoheterocyclic compounds	(5'->5')-dinucleotides		20190304JAP_CCSdatabase_final.csv
Flavin Adenine Dinucleotide	C27H33N9O15P2	2734019	CC1=CC2=C(C=C1C)N(C3=NC(=O)NC(=O)C3=N2)C[C@@H]([C@@H]([C@@H](COP(=O)([O-])OP(=O)([O-])OC[C@@H]4[C@H]([C@H]([C@@H](O4)N5C=NC6=C(N=CN=C65)N)O)O)O)O)O.[Na+].[Na+]	[M-H]	238.5	Organoheterocyclic compounds	Flavin nucleotides		20190304JAP_CCSdatabase_final.csv
Riboflavin-5'-monophosphate Sodium Salt Hydrate 90%	C17H21N4O9P	89636	CC1=CC2=C(C=C1C)N(C3=NC(=O)NC(=O)C3=N2)C[C@@H]([C@@H]([C@@H](COP(=O)(O)[O-])O)O)O.[Na+]	[M-H]	200.1	Organoheterocyclic compounds	Flavin nucleotides		20190304JAP_CCSdatabase_final.csv
Tetracycline	C22H24N2O8	51580080	C[C@@]1([C@H]2C[C@H]3[C@@H](C(=O)C(=C([C@]3(C(=O)C2=C(C4=C1C=CC=C4O)O)O)[O-])C(=O)N)[NH+](C)C)O	[M-H]	200.2	Organoheterocyclic compounds	Tetracyclines		20190304JAP_CCSdatabase_final.csv
GDP-D-mannose	C16H25N5O16P2	18396	C1=NC2=C(N1[C@H]3[C@@H]([C@@H]([C@H](O3)COP(=O)(O)OP(=O)(O)O[C@@H]4[C@H]([C@H]([C@@H]([C@H](O4)CO)O)O)O)O)O)NC(=NC2=O)N	[M-H]-	212.0333333	Organoheterocyclic compounds	Sugars		metabolitedata.csv
Acetyl coenzyme A	C23H38N7O17P3S	444493	CC(=O)SCCNC(=O)CCNC(=O)[C@@H](C(C)(C)COP(=O)(O)OP(=O)(O)OC[C@@H]1[C@H]([C@H]([C@@H](O1)N2C=NC3=C(N=CN=C32)N)O)OP(=O)(O)O)O	[M+H]	249.8022836	Organoheterocyclic compounds	Lipids		metabolitedata.csv
Riboflavin 5'-Monophosphate	C17H21N4O9P	643976	CC1=CC2=C(C=C1C)N(C3=NC(=O)NC(=O)C3=N2)C[C@@H]([C@@H]([C@@H](COP(=O)(O)O)O)O)O	[M+H]	201.4772106	Organoheterocyclic compounds	Nucleotides		metabolitedata.csv
Flavin Adenine Dinucleotide	C27H33N9O15P2	643975	CC1=CC2=C(C=C1C)N(C3=NC(=O)NC(=O)C3=N2)C[C@@H]([C@@H]([C@@H](COP(=O)(O)OP(=O)(O)OC[C@@H]4[C@H]([C@H]([C@@H](O4)N5C=NC6=C(N=CN=C65)N)O)O)O)O)O	[M-H]-	259.2159142	Organoheterocyclic compounds	Nucleotides		metabolitedata.csv
Anthraquinone (AQU)	C14H8O2	6780	C1=CC=C2C(=C1)C(=O)C3=CC=CC=C3C2=O	[M+H]	141.8919677	Organoheterocyclic compounds	PAHs		metabolitedata.csv
Thiamine Monophosphate	C12H18N4O4PS+	1131	CC1=C(SC=[N+]1CC2=CN=C(N=C2N)C)CCOP(=O)(O)O	[M+H]	172.5333333	Organoheterocyclic compounds	Vitamins		metabolitedata.csv
Vitamin B12	C63H88CoN14O14P	24892734	CC1=CC2=C(C=C1C)N(C=N2)[C@@H]3[C@@H]([C@@H]([C@H](O3)CO)OP(=O)([O-])O[C@H](C)CNC(=O)CC[C@@]\4([C@H](C5[C@]6([C@@]([C@@H](C(=N6)/C(=C\7/[C@@]([C@@H](C(=N7)/C=C\8/C([C@@H](C(=N8)/C(=C4\[N-]5)/C)CCC(=O)N)(C)C)CCC(=O)N)(C)CC(=O)N)/C)CCC(=O)N)(C)CC(=O)N)C)CC(=O)N)C)O.[C-]#N.[Co+3]	[M+H]	338.7	Organoheterocyclic compounds	Vitamins		metabolitedata.csv
Reserpine	C33H40N2O9	5770	CO[C@H]1[C@@H](C[C@@H]2CN3CCC4=C([C@H]3C[C@@H]2[C@@H]1C(=O)OC)NC5=C4C=CC(=C5)OC)OC(=O)C6=CC(=C(C(=C6)OC)OC)OC	[M+H]	250.8	Organoheterocyclic compounds	Yohimbine alkaloids		20190304JAP_CCSdatabase_final.csv
Rifampicin	C43H58N4O12	5381226	C[C@H]1/C=C/C=C(\C(=O)NC\2=C(C3=C(C4=C(C(=C3O)C)O[C@@](C4=O)(O/C=C/[C@@H]([C@H]([C@H]([C@@H]([C@@H]([C@@H]([C@H]1O)C)O)C)OC(=O)C)C)OC)C)C(=O)/C2=C/NN5CCN(CC5)C)O)/C	[M+H]	287.13	Organoheterocyclic compounds			metabolitedata.csv
Leucovorin Calcium	C20H21CaN7O7	6006	C1C(N(C2=C(N1)NC(=NC2=O)N)C=O)CNC3=CC=C(C=C3)C(=O)N[C@@H](CCC(=O)O)C(=O)O	[M+H]	198.7962098	Organoheterocyclic compounds			metabolitedata.csv
Tetracycline	C22H24N2O8	54675776	C[C@@]1([C@H]2C[C@H]3[C@@H](C(=O)C(=C([C@]3(C(=O)C2=C(C4=C1C=CC=C4O)O)O)O)C(=O)N)N(C)C)O	[M+H]	198.4833333	Organoheterocyclic compounds			metabolitedata.csv
Astilbin	C21H22O11	119258	C[C@H]1[C@@H]([C@H]([C@H]([C@@H](O1)O[C@@H]2[C@H](OC3=CC(=CC(=C3C2=O)O)O)C4=CC(=C(C=C4)O)O)O)O)O	[M-H]	197.7	Organoheterocyclic compounds	Flavonoids	Flavonoid glycosides	20190304JAP_CCSdatabase_final.csv
Rotenone	C23H22O6	6758	CC(=C)[C@H]1CC2=C(O1)C=CC3=C2O[C@@H]4COC5=CC(=C(C=C5[C@@H]4C3=O)OC)OC	[M-H]	201.8	Organoheterocyclic compounds	Isoflavonoids	Isoflavans	20190304JAP_CCSdatabase_final.csv
Deoxyguanosine	C10H13N5O4	187790	C1[C@@H]([C@H](O[C@H]1N2C=NC3=C2NC(=NC3=O)N)CO)O	[M-H]	159.2	Organoheterocyclic compounds	Purine nucleosides	Purine 2'-deoxyribonucleosides	20190304JAP_CCSdatabase_final.csv
Perfluorodecylphosponic acid	C10H2F21O3P	85828788	C(C(C(C(C(C(F)(F)P(=O)(O)O)(F)F)(F)F)(F)F)(F)F)(C(C(C(C(F)(F)F)(F)F)(F)F)(F)F)(F)F	[M-H]-	188.25	Organic acids and derivatives	PFAS		UACCSCEC_ac1c00142_si_002_TS-5.csv
perfluorodecane sulfonic acid	C10HF21O3S	67636	C(C(C(C(C(C(F)(F)S(=O)(=O)O)(F)F)(F)F)(F)F)(F)F)(C(C(C(C(F)(F)F)(F)F)(F)F)(F)F)(F)F	[M-H]-	186.91	Organic acids and derivatives	PFAS		UACCSCEC_ac1c00142_si_002_TS-5.csv
Perfluorooctane sulfonamide	C8H2F17NO2S	69785	C(C(C(C(C(F)(F)S(=O)(=O)N)(F)F)(F)F)(F)F)(C(C(C(F)(F)F)(F)F)(F)F)(F)F	[M-H]-	170.13	Organic acids and derivatives	PFAS		UACCSCEC_ac1c00142_si_002_TS-5.csv
perfluorooctylsulfonic acid	C8HF17O3S	74483	C(C(C(C(C(F)(F)S(=O)(=O)O)(F)F)(F)F)(F)F)(C(C(C(F)(F)F)(F)F)(F)F)(F)F	[M-H]-	168.89	Organic acids and derivatives	PFAS		UACCSCEC_ac1c00142_si_002_TS-5.csv
6:2 chlorinated polyfluorinated ether sulfonate	C8HClF16O4S	22568738	C(C(C(C(F)(F)Cl)(F)F)(F)F)(C(C(OC(C(F)(F)S(=O)(=O)O)(F)F)(F)F)(F)F)(F)F	[M-H]-	170.98	Organic acids and derivatives	PFAS		UACCSCEC_ac1c00142_si_002_TS-5.csv
perfluorohexanesulfonic acid	C6HF13O3S	67734	C(C(C(C(F)(F)S(=O)(=O)O)(F)F)(F)F)(C(C(F)(F)F)(F)F)(F)F	[M-H]-	150.81	Organic acids and derivatives	PFAS		UACCSCEC_ac1c00142_si_002_TS-5.csv
N-ethylperfluorooctane sulfonamido acetic acid	C12H8F17NO4S	18134	CCN(CC(=O)O)S(=O)(=O)C(C(C(C(C(C(C(C(F)(F)F)(F)F)(F)F)(F)F)(F)F)(F)F)(F)F)(F)F	[M-H]-	196.81	Organic acids and derivatives	PFAS		UACCSCEC_ac1c00142_si_002_TS-5.csv
N-ethylperfluorooctanesulfonamide	C10H6F17NO2S	77797	CCNS(=O)(=O)C(C(C(C(C(C(C(C(F)(F)F)(F)F)(F)F)(F)F)(F)F)(F)F)(F)F)(F)F	[M-H]-	178.42	Organic acids and derivatives	PFAS		UACCSCEC_ac1c00142_si_002_TS-5.csv
N-methylperfluorooctane sulfonamido acetic acid	C11H6F17NO4S	22286931	CN(CC(=O)O)S(=O)(=O)C(C(C(C(C(C(C(C(F)(F)F)(F)F)(F)F)(F)F)(F)F)(F)F)(F)F)(F)F	[M-H]-	193.17	Organic acids and derivatives	PFAS		UACCSCEC_ac1c00142_si_002_TS-5.csv
N-Methylperfluorooctane sulfonamide	C9H4F17NO2S	3034468	CNS(=O)(=O)C(C(C(C(C(C(C(C(F)(F)F)(F)F)(F)F)(F)F)(F)F)(F)F)(F)F)(F)F	[M-H]-	173.97	Organic acids and derivatives	PFAS		UACCSCEC_ac1c00142_si_002_TS-5.csv
8-Chloroperfluorooctylphosponic acid	C8H2ClF16O3P	138395139	O=P(O)(O)C(F)(F)C(F)(F)C(F)(F)C(F)(F)C(F)(F)C(F)(F)C(F)(F)C(F)(F)Cl	[M-H]-	175.27	Organic acids and derivatives	PFAS		UACCSCEC_ac1c00142_si_002_TS-5.csv
6-Chloroperfluorohexylphosphonic acid	C6H2ClF12O3P	101545603	O=P(O)(O)C(F)(F)C(F)(F)C(F)(F)C(F)(F)C(F)(F)C(F)(F)Cl	[M-H]-	157.41	Organic acids and derivatives	PFAS		UACCSCEC_ac1c00142_si_002_TS-5.csv
Naringin	C27H32O14	442428	C[C@H]1[C@@H]([C@H]([C@H]([C@@H](O1)O[C@@H]2[C@H]([C@@H]([C@H](O[C@H]2OC3=CC(=C4C(=O)C[C@H](OC4=C3)C5=CC=C(C=C5)O)O)CO)O)O)O)O)O	[M-H]	216.6	Organoheterocyclic compounds	Flavonoids	Flavonoid glycosides	20190304JAP_CCSdatabase_final.csv
Catechin	C15H14O6	9064	C1[C@@H]([C@H](OC2=CC(=CC(=C21)O)O)C3=CC(=C(C=C3)O)O)O	[M-H]	159.4	Organoheterocyclic compounds	Flavonoids	Flavans	20190304JAP_CCSdatabase_final.csv
Eriodictyol	C15H12O6	440735	C1[C@H](OC2=CC(=CC(=C2C1=O)O)O)C3=CC(=C(C=C3)O)O	[M+H]	169.4	Organoheterocyclic compounds	Flavonoids	Flavans	20190304JAP_CCSdatabase_final.csv
Naringenin	C15H12O5	439246	C1[C@H](OC2=CC(=CC(=C2C1=O)O)O)C3=CC=C(C=C3)O	[M-H]	166.8	Organoheterocyclic compounds	Flavonoids	Flavans	20190304JAP_CCSdatabase_final.csv
Daidzein	C15H10O4	5281708	C1=CC(=CC=C1C2=COC3=C(C2=O)C=CC(=C3)O)O	[M-H]	161.8	Organoheterocyclic compounds	Isoflavonoids	Isoflav-2-enes	20190304JAP_CCSdatabase_final.csv
Genistein	C15H10O5	5280961	C1=CC(=CC=C1C2=COC3=CC(=CC(=C3C2=O)O)O)O	[M-H]	163.6	Organoheterocyclic compounds	Isoflavonoids	Isoflav-2-enes	20190304JAP_CCSdatabase_final.csv
Hesperetin	C16H14O6	72281	COC1=C(C=C(C=C1)[C@@H]2CC(=O)C3=C(C=C(C=C3O2)O)O)O	[M-H]	177.9	Organoheterocyclic compounds	Isoflavonoids	O-methylated isoflavonoids	20190304JAP_CCSdatabase_final.csv
Prunetin	C16H12O5	5281804	COC1=CC(=C2C(=C1)OC=C(C2=O)C3=CC=C(C=C3)O)O	[M-H]	174.6	Organoheterocyclic compounds	Flavonoids	O-methylated flavonoids	20190304JAP_CCSdatabase_final.csv
Pinostrobin	C16H14O4	4101463	COC1=CC(=C2C(=O)CC(OC2=C1)C3=CC=CC=C3)O	[M-H]	168.2	Organoheterocyclic compounds	Flavonoids	O-methylated flavonoids	20190304JAP_CCSdatabase_final.csv
Formononetin	C16H12O4	5280378	COC1=CC=C(C=C1)C2=COC3=C(C2=O)C=CC(=C3)O	[M-H]	168.5	Organoheterocyclic compounds	Isoflavonoids	O-methylated isoflavonoids	20190304JAP_CCSdatabase_final.csv
Biochanin A	C16H12O5	5280373	COC1=CC=C(C=C1)C2=COC3=CC(=CC(=C3C2=O)O)O	[M-H]	169.8	Organoheterocyclic compounds	Isoflavonoids	O-methylated isoflavonoids	20190304JAP_CCSdatabase_final.csv
Hexakis(1H,1H,9H-perfluorononyloxy) phosphazene	C54H18F96N3O6P3	45075663	C(C(C(C(C(C(C(C(C(F)F)(F)F)(F)F)(F)F)(F)F)(F)F)(F)F)(F)F)OP1(=NP(=NP(=N1)(OCC(C(C(C(C(C(C(C(F)F)(F)F)(F)F)(F)F)(F)F)(F)F)(F)F)(F)F)OCC(C(C(C(C(C(C(C(F)F)(F)F)(F)F)(F)F)(F)F)(F)F)(F)F)(F)F)(OCC(C(C(C(C(C(C(C(F)F)(F)F)(F)F)(F)F)(F)F)(F)F)(F)F)(F)F)OCC(C(C(C(C(C(C(C(F)F)(F)F)(F)F)(F)F)(F)F)(F)F)(F)F)(F)F)OCC(C(C(C(C(C(C(C(F)F)(F)F)(F)F)(F)F)(F)F)(F)F)(F)F)(F)F	[M+H]	441.2	Organoheterocyclic compounds	Organofluorides	Phosphazene and phosphazene derivatives	20190304JAP_CCSdatabase_final.csv
Hexakis(1H,1H,7H-perfluoroheptoxy)phosphazene	C42H18F72N3O6P3	2775073	C(C(C(C(C(C(C(F)F)(F)F)(F)F)(F)F)(F)F)(F)F)OP1(=NP(=NP(=N1)(OCC(C(C(C(C(C(F)F)(F)F)(F)F)(F)F)(F)F)(F)F)OCC(C(C(C(C(C(F)F)(F)F)(F)F)(F)F)(F)F)(F)F)(OCC(C(C(C(C(C(F)F)(F)F)(F)F)(F)F)(F)F)(F)F)OCC(C(C(C(C(C(F)F)(F)F)(F)F)(F)F)(F)F)(F)F)OCC(C(C(C(C(C(F)F)(F)F)(F)F)(F)F)(F)F)(F)F	[M+H]	382.7	Organoheterocyclic compounds	Organofluorides	Phosphazene and phosphazene derivatives	20190304JAP_CCSdatabase_final.csv
Hexakis(1H,1H,5H-octafluoropentoxy) phosphazene	C30H18F48N3O6P3	2775070	C(C(C(C(C(F)F)(F)F)(F)F)(F)F)OP1(=NP(=NP(=N1)(OCC(C(C(C(F)F)(F)F)(F)F)(F)F)OCC(C(C(C(F)F)(F)F)(F)F)(F)F)(OCC(C(C(C(F)F)(F)F)(F)F)(F)F)OCC(C(C(C(F)F)(F)F)(F)F)(F)F)OCC(C(C(C(F)F)(F)F)(F)F)(F)F	[M+H]	316.5	Organoheterocyclic compounds	Organofluorides	Phosphazene and phosphazene derivatives	20190304JAP_CCSdatabase_final.csv
Hexakis(1h,1h,9h-perfluorononyloxy) phosphazene	C54H18F96N3O6P3	[Compound(45075663)]	C(C(C(C(C(C(C(C(C(F)F)(F)F)(F)F)(F)F)(F)F)(F)F)(F)F)(F)F)OP1(=NP(=NP(=N1)(OCC(C(C(C(C(C(C(C(F)F)(F)F)(F)F)(F)F)(F)F)(F)F)(F)F)(F)F)OCC(C(C(C(C(C(C(C(F)F)(F)F)(F)F)(F)F)(F)F)(F)F)(F)F)(F)F)(OCC(C(C(C(C(C(C(C(F)F)(F)F)(F)F)(F)F)(F)F)(F)F)(F)F)(F)F)OCC(C(C(C(C(C(C(C(F)F)(F)F)(F)F)(F)F)(F)F)(F)F)(F)F)(F)F)OCC(C(C(C(C(C(C(C(F)F)(F)F)(F)F)(F)F)(F)F)(F)F)(F)F)(F)F	[M+H]	441.21	Organoheterocyclic compounds	Organofluorides	Phosphazene and phosphazene derivatives	UnifiedCCSCompendium_20200812.csv
Hexakis(1h,1h,7h-perfluoroheptoxy) phosphazene	C42H18F72N3O6P3	[Compound(2775073)]	C(C(C(C(C(C(C(F)F)(F)F)(F)F)(F)F)(F)F)(F)F)OP1(=NP(=NP(=N1)(OCC(C(C(C(C(C(F)F)(F)F)(F)F)(F)F)(F)F)(F)F)OCC(C(C(C(C(C(F)F)(F)F)(F)F)(F)F)(F)F)(F)F)(OCC(C(C(C(C(C(F)F)(F)F)(F)F)(F)F)(F)F)(F)F)OCC(C(C(C(C(C(F)F)(F)F)(F)F)(F)F)(F)F)(F)F)OCC(C(C(C(C(C(F)F)(F)F)(F)F)(F)F)(F)F)(F)F	[M+H]	383.03	Organoheterocyclic compounds	Organofluorides	Phosphazene and phosphazene derivatives	UnifiedCCSCompendium_20200812.csv
GalCer (d18:1/12:0)	C36H69NO8	6411284	CCCCCCCCCCCCC/C=C/[C@H]([C@H](CO[C@H]1C(C([C@@H](C(O1)CO)O)O)O)NC(=O)CCCCCCCCCCC)O	[M+H]	271.149719	Lipids and lipid-like molecules	Lipids		metabolitedata.csv
beta-Pseudouridine	C9H12N2O6	15047	C1=C(C(=O)NC(=O)N1)[C@H]2[C@@H]([C@@H]([C@H](O2)CO)O)O	[M-H]	150.3	Organoheterocyclic compounds	Nucleoside and nucleotide analogues		20190304JAP_CCSdatabase_final.csv
Nicotinamide Mononucleotide	C11H15N2O8P	14180	C1=CC(=C[N+](=C1)[C@H]2[C@@H]([C@@H]([C@H](O2)COP(=O)(O)[O-])O)O)C(=O)N	[M+H]	165.8	Organoheterocyclic compounds	Pyridine nucleotides	Nicotinamide nucleotides	20190304JAP_CCSdatabase_final.csv
Trigonelline	C7H7NO2	5570	C[N+]1=CC=CC(=C1)C(=O)[O-]	[M+H]	126.3666667	Organoheterocyclic compounds	Alkaloids		metabolitedata.csv
Trigonelline	C7H7NO2	134606	C[N+]1=CC=CC(=C1)C(=O)O.[Cl-]	[M+H]	124.1	Organoheterocyclic compounds			20190304JAP_CCSdatabase_final.csv
Naringenin	C15H12O5	932	C1C(OC2=CC(=CC(=C2C1=O)O)O)C3=CC=C(C=C3)O	[M+H]	167.9647005	Benzenoids	Phenolics		metabolitedata.csv
Pinostrobin	C16H14O4	73201	COC1=CC(=C2C(=O)C[C@H](OC2=C1)C3=CC=CC=C3)O	[M+H]	164.2448119	Benzenoids	Phenolics		metabolitedata.csv
Ampicillin	C16H19N3O4S	6249	CC1([C@@H](N2[C@H](S1)[C@@H](C2=O)NC(=O)[C@@H](C3=CC=CC=C3)N)C(=O)O)C	[M+H]	193.1666667	Organoheterocyclic compounds			metabolitedata.csv
perfluorobutanesulfonic acid	C4HF9O3S	67815	C(C(C(F)(F)S(=O)(=O)O)(F)F)(C(F)(F)F)(F)F	[M-H]-	133.28	Organic acids and derivatives	PFAS		UACCSCEC_ac1c00142_si_002_TS-5.csv
1H,1H,2H,2H-Perfluorododecanesulfonic acid	C12H5F21O3S	23136180	C(CS(=O)(=O)O)C(C(C(C(C(C(C(C(C(C(F)(F)F)(F)F)(F)F)(F)F)(F)F)(F)F)(F)F)(F)F)(F)F)(F)F	[M-H]-	204.21	Organic acids and derivatives	PFAS		UACCSCEC_ac1c00142_si_002_TS-5.csv
8:2 Fluorotelomer sulfonic acid	C10H5F17O3S	3016044	C(CS(=O)(=O)O)C(C(C(C(C(C(C(C(F)(F)F)(F)F)(F)F)(F)F)(F)F)(F)F)(F)F)(F)F	[M-H]-	186.39	Organic acids and derivatives	PFAS		UACCSCEC_ac1c00142_si_002_TS-5.csv
Sodium 1H,1H,2H,2H-perfluorooctane sulfonate	C8H5F13O3S	119688	C(CS(=O)(=O)O)C(C(C(C(C(C(F)(F)F)(F)F)(F)F)(F)F)(F)F)(F)F	[M-H]-	168.47	Organic acids and derivatives	PFAS		UACCSCEC_ac1c00142_si_002_TS-5.csv
Hexakis(2,2,3,3-tetrafluoropropoxy)phosphazene	C18H18F24N3O6P3	2775076	C(C(C(F)F)(F)F)OP1(=NP(=NP(=N1)(OCC(C(F)F)(F)F)OCC(C(F)F)(F)F)(OCC(C(F)F)(F)F)OCC(C(F)F)(F)F)OCC(C(F)F)(F)F	[M+H]	243.5	Organoheterocyclic compounds	Organofluorides	Phosphazene and phosphazene derivatives	20190304JAP_CCSdatabase_final.csv
Hexakis(2,2-difluoroethoxy)phosphazene	C12H18F12N3O6P3	44717242	C(C(F)F)OP1(=NP(=NP(=N1)(OCC(F)F)OCC(F)F)(OCC(F)F)OCC(F)F)OCC(F)F	[M+H]	202.8	Organoheterocyclic compounds	Organofluorides	Phosphazene and phosphazene derivatives	20190304JAP_CCSdatabase_final.csv
Bis (1H,1H,2H,2H-perflurodecyl) phosphate - 8:2 Fluorotelomer phosphate diester	C20H9F34O4P	3022253	C(COP(=O)(O)OCCC(C(C(C(C(C(C(C(F)(F)F)(F)F)(F)F)(F)F)(F)F)(F)F)(F)F)(F)F)C(C(C(C(C(C(C(C(F)(F)F)(F)F)(F)F)(F)F)(F)F)(F)F)(F)F)(F)F	[M-H]-	261.61	Organic acids and derivatives	PFAS		UACCSCEC_ac1c00142_si_002_TS-5.csv
Hexamethoxyphosphazene	C6H18N3O6P3	136772	COP1(=NP(=NP(=N1)(OC)OC)(OC)OC)OC	[M+H]	153.4	Organoheterocyclic compounds	Organofluorides	Phosphazene and phosphazene derivatives	20190304JAP_CCSdatabase_final.csv
Bisphenol P	C24H26O2	630355	CC(C)(C1=CC=C(C=C1)C(C)(C)C2=CC=C(C=C2)O)C3=CC=C(C=C3)O	[M-H]-	180.64	Benzenoids	Bisphenols		UACCSCEC_ac1c00142_si_002_TS-5.csv
Bisphenol B	C16H18O2	66166	CCC(C)(C1=CC=C(C=C1)O)C2=CC=C(C=C2)O	[M-H]-	167.17	Benzenoids	Bisphenols		UACCSCEC_ac1c00142_si_002_TS-5.csv
3,5,6-Trichloro-2-pyridinol	C5H2Cl3NO	23017	C1=C(C(=O)NC(=C1Cl)Cl)Cl	[M+H]+	130.45	Organoheterocyclic compounds			UACCSCEC_ac1c00142_si_002_TS-5.csv
4-Methylbenzotriazole	C7H7N3	122499	CC1=CC=CC2=NNN=C12	[M+H]+	126.79	Organoheterocyclic compounds	Triazoles		UACCSCEC_ac1c00142_si_002_TS-5.csv
5-methyl-1H-benzotriazole	C7H7N3	8705	CC1=CC2=NNN=C2C=C1	[M-H]-	124.64	Organoheterocyclic compounds	Triazoles		UACCSCEC_ac1c00142_si_002_TS-5.csv
5,6-Dimethylbenzotriazole	C8H9N3	77849	CC1=CC2=NNN=C2C=C1C	[M+H]+	131.25	Organoheterocyclic compounds	Triazoles		UACCSCEC_ac1c00142_si_002_TS-5.csv
Umbelliferone	C9H6O3	5281426	C1=CC(=CC2=C1C=CC(=O)O2)O	[M-H]	130.1	Organoheterocyclic compounds	Coumarins and derivatives	Hydroxycoumarins	20190304JAP_CCSdatabase_final.csv
2-Benzothiazolol	C7H5NOS	13625	C1=CC=C2C(=C1)NC(=O)S2	[M-H]-	123.75	Organoheterocyclic compounds	Thiazoles		UACCSCEC_ac1c00142_si_002_TS-5.csv
Adenosine-3',5'-Diphosphate	C10H15N5O10P2	81690	COC1=CC=CC=C1OCC(CO)(CO)CO	[M-H]	184.3	Organoheterocyclic compounds	Purine nucleotides	Purine ribonucleotides	20190304JAP_CCSdatabase_final.csv
4-((4-(Benzyloxy)phenyl)sulfonyl)phenol	C15H14O4S	2054598	C=CCOC1=CC=C(C=C1)S(=O)(=O)C2=CC=C(C=C2)O	[M-H]-	172.68	Benzenoids	Bisphenols		UACCSCEC_ac1c00142_si_002_TS-5.csv
4-((4-Isopropoxyphenyl)sulfonyl)phenol	C15H16O4S	9904141	CC(C)OC1=CC=C(C=C1)S(=O)(=O)C2=CC=C(C=C2)O	[M-H]-	174.81	Benzenoids	Bisphenols		UACCSCEC_ac1c00142_si_002_TS-5.csv
Benzotriazole	C6H5N3	7220	C1=CC2=NNN=C2C=C1	[M-H]-	118.3	Organoheterocyclic compounds	Triazoles		UACCSCEC_ac1c00142_si_002_TS-5.csv
5-Chlorobenzotriazole	C6H4ClN3	66760	C1=CC2=NNN=C2C=C1Cl	[M+H]+	131.88	Organoheterocyclic compounds	Triazoles		UACCSCEC_ac1c00142_si_002_TS-5.csv
Pyrazole	C3H4N2	1048	C1=CNN=C1	[M+H]	125.47	Organoheterocyclic compounds	Alkaloids		metabolitedata.csv
Coenzyme A	C21H36N7O16P3S	271338	CCCCCCCCCCCCCCCCCC(CCCCCCCCCCCCCCCC)CCCCCCCCCCCCCCCC	[M-H]	244.1	Lipids and lipid-like molecules	Purine nucleotides	Purine ribonucleotides	20190304JAP_CCSdatabase_final.csv
